# Supplementary material for: Exploring a link between the Middle Eocene Climatic Optimum and Neotethys continental arc flare-up
Source: Copernicus journal article supplement (doi:10.5194/cp-17-229-2021), 2021-01-18
Supplement: Supplementary file 1 [file S10_VU101B-A2c.xls]

## Sheet: Summary Table
	Relative Abundances			36Ar [fA]	%1s	37Ar [fA]	%1s	38Ar [fA]	%1s	39Ar [fA]	%1s	40Ar [fA]	%1s	40(r)/39(k)	± 2s	Age	± 2s	40Ar(r)	39Ar(k)	K/Ca	± 2s		Procedure Blanks		36Ar [fA]	1s	37Ar [fA]	1s	38Ar [fA]	1s	39Ar [fA]	1s	40Ar [fA]	1s		Sample Parameters		Sample	Material	Location	Analyst	Standard	%1s	J	%1s	MDF	%1s	Volume Ratio	Sensitivity
																(Ma)		(%)	(%)																							(in Ma)							(mol/volt)
	23_VU101B-A2	10		1.84725	1.03609	0.643854	4.64017	0.369734	0.873284	2.00331	0.409603	577.999	0.19953	13.2471	5.85014	73.1142	31.6521	4.59039	7.50565	1.33763	0.12462		23_VU101B-A2	10	0.0178861	0.0003709	0.006083	0.0001107	0.007755	0.0001319	0.0041062	0.0001439	5.27696	0.0497968		23_VU101B-A2	10	23_VU101B-A2	groundmass	AZ16M	Klaudia Kuiper	28.201	0.08	0.0030745	0.2	0.971118	0.2	1	1e-13
	24_VU101B-A2	12		0.115872	1.13303	0.790914	1.56972	0.0525793	1.25525	2.7224	0.213505	57.0676	0.114714	8.27849	0.295318	46.0323	1.62163	39.4846	10.2	1.47981	0.0468855		24_VU101B-A2	12	0.0178861	0.0003709	0.006083	0.0001107	0.007755	0.0001319	0.0041062	0.0001439	5.27696	0.0497968		24_VU101B-A2	12	24_VU101B-A2	groundmass	AZ16M	Klaudia Kuiper	28.201	0.08	0.0030745	0.2	0.971118	0.2	1	1e-13
	26_VU101B-A2	16		0.051645	1.40118	1.01188	1.65821	0.0357464	0.726563	2.12916	0.242646	31.865	0.0902885	7.76321	0.208783	43.2006	1.14823	51.8557	7.9763	0.904495	0.0303165		26_VU101B-A2	16	0.0191107	0.0001775	0.0067459	0.0001404	0.0079866	0.0001224	0.0054116	0.0001805	5.49142	0.0125634		26_VU101B-A2	16	26_VU101B-A2	groundmass	AZ16M	Klaudia Kuiper	28.201	0.08	0.0030745	0.2	0.971118	0.2	1	1e-13
	27_VU101B-A2	23	4	0.100029	1.53932	8.65714	1.15147	0.0791688	1.01078	4.89919	0.648946	65.4694	0.636605	7.41475	0.27161	41.2832	1.49532	55.4199	18.3375	0.243053	0.00642693		27_VU101B-A2	23	0.0191107	0.0001775	0.0067459	0.0001404	0.0079866	0.0001224	0.0054116	0.0001805	5.49142	0.0125634		27_VU101B-A2	23	27_VU101B-A2	groundmass	AZ16M	Klaudia Kuiper	28.201	0.08	0.0030745	0.2	0.971118	0.2	1	1e-13
	28_VU101B-A2	80	4	0.0531615	1.4349	2.75808	0.960299	0.0462496	0.994225	2.91001	0.493363	37.1546	0.457248	7.39223	0.208897	41.1592	1.15014	57.8601	10.8981	0.453398	0.00979127		28_VU101B-A2	80	0.0191107	0.0001775	0.0067459	0.0001404	0.0079866	0.0001224	0.0054116	0.0001805	5.49142	0.0125634		28_VU101B-A2	80	28_VU101B-A2	groundmass	AZ16M	Klaudia Kuiper	28.201	0.08	0.0030745	0.2	0.971118	0.2	1	1e-13
	31_VU101B-A2	12		1.71106	0.885235	1.01812	1.35474	0.357294	0.45462	3.54798	0.218137	543.311	0.0627902	9.17181	2.57473	50.9311	14.1004	5.9883	13.2932	1.49819	0.041116		31_VU101B-A2	12	0.0192581	0.0002984	0.0069299	0.0001397	0.0080857	0.0001355	0.0053998	0.0001856	5.5861	0.0155074		31_VU101B-A2	12	31_VU101B-A2	groundmass	AZ16M	Klaudia Kuiper	28.201	0.08	0.0030745	0.2	0.971118	0.2	1	1e-13
	32_VU101B-A2	16		0.157795	1.05546	0.988727	1.26658	0.065517	0.66135	3.1155	0.213461	71.111	0.0885907	7.72912	0.325035	43.0132	1.78775	33.8554	11.6726	1.35465	0.0347996		32_VU101B-A2	16	0.0192581	0.0002984	0.0069299	0.0001397	0.0080857	0.0001355	0.0053998	0.0001856	5.5861	0.0155074		32_VU101B-A2	16	32_VU101B-A2	groundmass	AZ16M	Klaudia Kuiper	28.201	0.08	0.0030745	0.2	0.971118	0.2	1	1e-13
	34_VU101B-A2	23	4	0.0901267	1.03131	2.69511	1.0327	0.0830241	0.668514	5.36995	0.215348	65.4468	0.0853602	7.21787	0.110444	40.199	0.608399	59.203	20.1167	0.856477	0.0180705		34_VU101B-A2	23	0.0182369	0.0002227	0.0064831	0.0001488	0.0077828	0.0001389	0.0053784	0.0002114	5.37042	0.0217505		34_VU101B-A2	23	34_VU101B-A2	groundmass	AZ16M	Klaudia Kuiper	28.201	0.08	0.0030745	0.2	0.971118	0.2	1	1e-13
			S	4.12694	0.595795	18.5638	0.616277	1.08931	0.354528	26.6975	0.149009	1449.42	0.0889235
	Information on Analysis and Constants Used in Calculations									Results		40(a)/36(a)	± 2s	40(r)/39(k)	± 2s	Age	± 2s	MSWD	39Ar(k)	K/Ca	± 2s
																(Ma)			(%,n)
	Sample = 23_VU101B-A2				Age Equations = Min et al. (2000)					Age Plateau				7.27413	0.1196	40.5089	0.677935	1.69435	49.3523	0.351071	0.249545
	Material = groundmass				Negative Intensities = Allowed										0.0164418		0.0167355	0.183719	3
	Location = AZ16M				Decay Constant 40K = 5.460 ± 0.053 E-10 1/a					Full External Error							1.08037	3	2σ Confidence Limit
	Analyst = Klaudia Kuiper				Decay Constant 39Ar = 2.940 ± 0.016 E-07 1/h					Analytical Error							0.658721	1.30167	Error Magnification
	Project = VU101				Decay Constant 37Ar = 8.230 ± 0.012 E-04 1/h
	Mass Discrimination Law = LIN				Decay Constant 36Cl = 2.257 ± 0.015 E-06 1/a					Total Fusion Age				8.19661	0.56224	45.5826	3.09334		8	0.618113	0.00783832
	Irradiation = VU101				Decay Activity 40K(EC,β⁺) = 3.310 ± 0.030 1/gs										0.0685942		0.0678622
	J = 0.00307450 ± 0.00000615				Decay Activity 40K(β⁻) = 27.890 ± 0.150 1/gs					Full External Error							3.23462
	FCs = 28.201 ± 0.023 Ma				Atmospheric Ratio 40/36(a) = 298.56 ± 0.31					Analytical Error							3.08809
	IGSN = Undefined				Atmospheric Ratio 38/36(a) = 0.1885 ± 0.0003
	Preferred Age = Undefined				Production Ratio 39/37(ca) = 0.000673 ± 0.000004					Normal Isochron		369.105	93.7504	6.05391	1.63232	33.7759	9.02448	0.451587	49.3523
	Classification = Undefined				Production Ratio 36/37(ca) = 0.000264 ± 0.000002								0.253994		0.26963		0.267187	0.501582	3
	Experiment Type = Undefined				Production Ratio 40/39(k) = 0.000860 ± 0.000070					Full External Error							9.05177	3.82843	2σ Confidence Limit
	Extraction Method = Undefined				Production Ratio 38/39(k) = 0.012110 ± 0.000030					Analytical Error							9.02349	1	Error Magnification
	Heating = 45 sec				Production Ratio 36/38(cl) = 262.80 ± 1.71												13		Number of Iterations
	Isolation = 5.00 min				Scaling Ratio K/Ca = 0.430												5.20557e-05		Convergence
	Instrument = HELIX				Abundance Ratio 40K/K = 1.1700 ± 0.0100 E-04
	Lithology = Undefined				Atomic Weight K = 39.0983 ± 0.0001 g					Inverse Isochron Clustered Points		369.47	94.2118	6.04809	1.62423	33.7437	8.97994	0.455466	49.3523
	Lat-Lon = Undefined - Undefined												0.254991		0.268553		0.266122	0.499751	3
	Feature = Undefined									Full External Error							9.00732	3.82843	2σ Confidence Limit
										Analytical Error							8.97895	1	Error Magnification
																	5		Number of Iterations
																	0.00020625		Convergence
																	0.0440379		Spreading Factor
[truncated: 39 more columns]

## Sheet: Hidden Data
Double Line Plot Age Plateau			Double Line Plot K/Ca Plateau			X-Y Plot Normal Isochron		X-Y Plot Inverse Isochron		Error Ellipses Normal Isochron		Error Ellipses Inverse Isochron
Ar39k%	Line 1	Line 2	Ar39k%	Line 1	Line 2	X-axis	Y-axis	X-axis	Y-axis	X-axis	Y-axis	X-axis	Y-axis
0	41.4621	104.766	0	1.21301	1.46225	1.08435	312.924	0.00346521	0.00319566			0.00346855	0.00326308
7.50565	41.4621	104.766	7.50565	1.21301	1.46225	23.5327	493.375	0.0476974	0.00202685			0.00347657	0.00326038
7.50565	47.6539	44.4106	7.50565	1.52669	1.43292	41.4279	620.173	0.0668005	0.00161245			0.00348381	0.00325327
17.7056	47.6539	44.4106	17.7056	1.52669	1.43292	50.0635	669.769	0.0747475	0.00149305			0.00348978	0.00324224
17.7056	42.0524	44.3489	17.7056	0.874178	0.934811	55.4641	708.563	0.0782769	0.00141131			0.00349408	0.00322802
25.6819	42.0524	44.3489	25.6819	0.874178	0.934811	2.07348	317.578	0.00652906	0.00314884			0.00349641	0.00321161
25.6819	42.7786	39.7879	25.6819	0.24948	0.236626	19.7724	451.384	0.0438041	0.00221541			0.00349662	0.0031941
44.0194	42.7786	39.7879	44.0194	0.24948	0.236626	60.0363	731.894	0.0820286	0.00136632			0.00349468	0.00317671
44.0194	40.0091	42.3093	44.0194	0.443607	0.463189							0.00349074	0.0031606
54.9175	40.0091	42.3093	54.9175	0.443607	0.463189							0.00348506	0.00314688
54.9175	65.0315	36.8307	54.9175	1.5393	1.45707							0.00347802	0.00313649
68.2107	65.0315	36.8307	68.2107	1.5393	1.45707							0.00347011	0.00313013
68.2107	41.2254	44.8009	68.2107	1.31985	1.38945							0.00346187	0.00312823
79.8833	41.2254	44.8009	79.8833	1.31985	1.38945							0.00345386	0.00313093
79.8833	40.8074	39.5906	79.8833	0.874548	0.838407							0.00344662	0.00313805
100	40.8074	39.5906	100	0.874548	0.838407							0.00344064	0.00314908
												0.00343634	0.00316329
												0.00343401	0.00317971
												0.00343381	0.00319721
												0.00343574	0.00321461
												0.00343968	0.00323072
												0.00344537	0.00324444
												0.0034524	0.00325483
												0.00346031	0.00326119
												0.00346855	0.00326308
												0.0479286	0.00202915
												0.0479209	0.00201711
												0.0478979	0.00200574
												0.0478612	0.00199581
												0.0478134	0.001988
												0.0477577	0.00198283
												0.0476978	0.00198066
												0.047638	0.00198164
												0.0475822	0.00198571
												0.0475342	0.00199257
												0.0474974	0.00200177
												0.0474741	0.00201269
												0.0474661	0.00202456
												0.0474739	0.0020366
												0.0474969	0.00204796
												0.0475336	0.0020579
												0.0475814	0.00206571
												0.0476371	0.00207088
												0.0476969	0.00207304
												0.0477568	0.00207206
												0.0478126	0.002068
												0.0478606	0.00206114
												0.0478974	0.00205193
												0.0479206	0.00204102
												0.0479286	0.00202915
												0.0671465	0.00161349
												0.0671347	0.00160167
												0.0671002	0.00159059
												0.0670452	0.00158101
												0.0669736	0.00157356
												0.0668902	0.00156877
												0.0668006	0.00156695
												0.0667111	0.00156823
												0.0666276	0.00157253
												0.0665559	0.00157955
												0.0665009	0.00158881
												0.0664663	0.00159968
												0.0664545	0.00161142
												0.0664663	0.00162323
												0.0665008	0.00163431
												0.0665557	0.0016439
												0.0666274	0.00165134
												0.0667108	0.00165614
												0.0668004	0.00165796
												0.0668899	0.00165667
												0.0669734	0.00165238
												0.0670451	0.00164536
												0.0671001	0.0016361
												0.0671347	0.00162523
												0.0671465	0.00161349
												0.0761074	0.00150638
												0.0760611	0.00149325
												0.0759254	0.00148011
												0.0757094	0.00146785
												0.0754278	0.00145731
												0.0750999	0.0014492
												0.074748	0.00144409
												0.074396	0.00144231
												0.074068	0.00144399
												0.0737862	0.00144901
												0.07357	0.00145703
												0.0734341	0.00146751
												0.0733876	0.00147973
												0.0734338	0.00149286
												0.0735696	0.001506
												0.0737856	0.00151826
												0.0740671	0.0015288
												0.0743951	0.0015369
												0.074747	0.00154202
												0.075099	0.0015438
												0.075427	0.00154212
												0.0757087	0.0015371
												0.0759249	0.00152907
												0.0760609	0.00151859
												0.0761074	0.00150638
												0.0793303	0.00142009
												0.0792945	0.00140889
												0.0791894	0.00139784
												0.079022	0.00138772
												0.0788039	0.0013792
												0.0785499	0.00137287
												0.0782772	0.00136917
												0.0780045	0.00136833
												0.0777504	0.00137042
												0.0775322	0.0013753
												0.0773647	0.00138263
												0.0772594	0.00139191
												0.0772234	0.00140252
												0.0772592	0.00141373
												0.0773643	0.00142477
												0.0775317	0.00143489
												0.0777498	0.00144341
												0.0780039	0.00144974
												0.0782765	0.00145345
												0.0785492	0.00145429
												0.0788033	0.00145219
												0.0790215	0.00144732
												0.079189	0.00143999
												0.0792944	0.0014307
												0.0793303	0.00142009
												0.00652987	0.00320473
												0.00653751	0.00320272
												0.00654458	0.00319703
												0.00655059	0.00318806
												0.00655513	0.00317641
												0.0065579	0.00316289
												0.0065587	0.00314841
												0.00655748	0.00313396
												0.00655432	0.00312052
												0.00654945	0.00310901
												0.00654318	0.00310021
												0.00653595	0.00309473
												0.00652826	0.00309294
												0.00652061	0.00309496
												0.00651355	0.00310064
												0.00650754	0.00310961
												0.00650299	0.00312126
												0.00650023	0.00313478
												0.00649943	0.00314926
												0.00650065	0.00316372
												0.0065038	0.00317716
												0.00650868	0.00318866
												0.00651494	0.00319746
												0.00652217	0.00320294
												0.00652987	0.00320473
												0.0440066	0.002217
												0.0439998	0.00220479
												0.0439796	0.0021933
												0.0439475	0.00218331
												0.0439056	0.00217552
												0.0438568	0.00217044
												0.0438044	0.00216843
												0.043752	0.00216962
												0.0437031	0.00217393
												0.0436611	0.00218107
												0.0436289	0.00219054
												0.0436085	0.00220172
												0.0436016	0.00221382
												0.0436084	0.00222603
												0.0436285	0.00223752
												0.0436606	0.00224751
												0.0437025	0.0022553
												0.0437513	0.00226038
												0.0438037	0.00226239
												0.0438561	0.0022612
												0.043905	0.00225689
												0.043947	0.00224976
												0.0439793	0.00224028
												0.0439996	0.00222911
												0.0440066	0.002217
												0.0824088	0.00136718
												0.0823959	0.00135978
												0.0823579	0.00135282
												0.0822975	0.00134678
												0.0822188	0.00134208
												0.0821271	0.00133902
												0.0820287	0.00133783
												0.0819303	0.00133858
												0.0818386	0.00134121
												0.0817599	0.00134556
												0.0816995	0.00135133
												0.0816615	0.00135811
												0.0816485	0.00136545
												0.0816614	0.00137286
												0.0816994	0.00137982
												0.0817598	0.00138585
												0.0818385	0.00139056
												0.0819302	0.00139361
												0.0820286	0.00139481
												0.082127	0.00139406
												0.0822187	0.00139142
												0.0822974	0.00138708
												0.0823578	0.00138131
												0.0823958	0.00137453
												0.0824088	0.00136718
