# Supplementary material for: Exploring a link between the Middle Eocene Climatic Optimum and Neotethys continental arc flare-up
Source: Copernicus journal article supplement (doi:10.5194/cp-17-229-2021), 2021-01-18
Supplement: Supplementary file 2 [file S11_VU101B-A2da.xls]

## Sheet: Summary Table
	Relative Abundances			36Ar [fA]	%1s	37Ar [fA]	%1s	38Ar [fA]	%1s	39Ar [fA]	%1s	40Ar [fA]	%1s	40(r)/39(k)	± 2s	Age	± 2s	40Ar(r)	39Ar(k)	K/Ca	± 2s		Procedure Blanks		36Ar [fA]	1s	37Ar [fA]	1s	38Ar [fA]	1s	39Ar [fA]	1s	40Ar [fA]	1s		Sample Parameters		Sample	Material	Location	Analyst	Standard	%1s	J	%1s	MDF	%1s	Volume Ratio	Sensitivity
																(Ma)		(%)	(%)																							(in Ma)							(mol/volt)
	002_VU101B-A2A	10		0.0182173	2.44304	0.318914	12.2232	0.00600551	3.18122	0.561647	2.1078	4.82837	0.214038	-1.04364	0.477358	-5.88619	2.69665	-12.1353	0.345621	0.756994	0.187791		002_VU101B-A2A	10	0.0191354	0.0001691	0.0065816	0.0001176	0.0052959	0.0001056	-1.29872	0.0096043	5.70665	0.005986		002_VU101B-A2A	10	002_VU101B-A2a	groundmass	AZ16M	Klaudia Kuiper	28.201	0.08	0.0030745	0.1	0.974435	0.17	1	1e-13
	003_VU101B-A2A	15		0.16877	0.89808	0.54203	5.9083	0.0433634	0.813913	1.48684	0.856991	55.7927	0.0411895	3.66377	0.616911	20.5152	3.43509	9.76136	0.915085	1.17924	0.140806		003_VU101B-A2A	15	0.0191354	0.0001691	0.0065816	0.0001176	0.0052959	0.0001056	-1.29872	0.0096043	5.70665	0.005986		003_VU101B-A2A	15	003_VU101B-A2a	groundmass	AZ16M	Klaudia Kuiper	28.201	0.08	0.0030745	0.1	0.974435	0.17	1	1e-13
	005_VU101B-A2A	20	4	2.15216	0.746062	2.44302	1.83026	0.491954	0.420649	8.68293	0.197375	704.653	0.0300968	7.17526	1.1165	39.9642	6.15121	8.83987	5.34425	1.52801	0.0562574		005_VU101B-A2A	20	0.0230306	0.000168	0.0082027	0.0001011	0.0080205	0.0001147	-0.761559	0.003736	5.55897	0.0044283		005_VU101B-A2A	20	005_VU101B-A2a	groundmass	AZ16M	Klaudia Kuiper	28.201	0.08	0.0030745	0.1	0.974435	0.17	1	1e-13
	006_VU101B-A2A	25	4	5.78682	0.739967	8.34506	1.37372	1.43751	0.384818	33.3261	0.175617	1945.61	0.0335186	6.55832	0.776233	36.5621	4.28451	11.2318	20.5123	1.71692	0.0475555		006_VU101B-A2A	25	0.0230306	0.000168	0.0082027	0.0001011	0.0080205	0.0001147	-0.761559	0.003736	5.55897	0.0044283		006_VU101B-A2A	25	006_VU101B-A2a	groundmass	AZ16M	Klaudia Kuiper	28.201	0.08	0.0030745	0.1	0.974435	0.17	1	1e-13
	008_VU101B-A2A	30	4	2.08329	0.740962	7.73703	1.14048	0.724035	0.393405	30.2823	0.177091	829.104	0.0293846	6.86001	0.308791	38.2266	1.70286	25.0513	18.6388	1.68271	0.0388419		008_VU101B-A2A	30	0.0247912	0.0002365	0.0083076	0.0001003	0.0088024	0.0001225	-0.755072	0.0037343	5.92556	0.0040735		008_VU101B-A2A	30	008_VU101B-A2a	groundmass	AZ16M	Klaudia Kuiper	28.201	0.08	0.0030745	0.1	0.974435	0.17	1	1e-13
	009_VU101B-A2A	35	4	0.500926	0.788361	6.52779	1.19029	0.329676	0.488568	21.2104	0.175512	294.236	0.0312307	6.84597	0.115031	38.1492	0.634379	49.3399	13.0546	1.39689	0.0336138		009_VU101B-A2A	35	0.0247912	0.0002365	0.0083076	0.0001003	0.0088024	0.0001225	-0.755072	0.0037343	5.92556	0.0040735		009_VU101B-A2A	35	009_VU101B-A2a	groundmass	AZ16M	Klaudia Kuiper	28.201	0.08	0.0030745	0.1	0.974435	0.17	1	1e-13
	011_VU101B-A2A	40	4	0.280329	0.81636	6.333	1.3072	0.257218	0.489653	18.252	0.178013	207.406	0.0350268	6.80602	0.079683	37.9288	0.439491	59.8798	11.2334	1.23899	0.0326914		011_VU101B-A2A	40	0.0230491	0.0002447	0.0082355	8.9e-05	0.0084009	0.000133	-0.750925	0.0043696	5.66583	0.0051987		011_VU101B-A2A	40	011_VU101B-A2a	groundmass	AZ16M	Klaudia Kuiper	28.201	0.08	0.0030745	0.1	0.974435	0.17	1	1e-13
	012_VU101B-A2A	50	4	0.296017	0.783685	6.77422	1.44726	0.292288	0.410108	20.964	0.177207	221.299	0.0312022	6.36637	0.0706922	35.5024	0.39042	60.2966	12.9028	1.33042	0.0387971		012_VU101B-A2A	50	0.0230491	0.0002447	0.0082355	8.9e-05	0.0084009	0.000133	-0.750925	0.0043696	5.66583	0.0051987		012_VU101B-A2A	50	012_VU101B-A2a	groundmass	AZ16M	Klaudia Kuiper	28.201	0.08	0.0030745	0.1	0.974435	0.17	1	1e-13
	014_VU101B-A2A	65	4	0.266577	0.858529	9.33307	1.18902	0.267419	0.483397	19.3137	0.174578	203.837	0.0355935	6.47246	0.0751711	36.0882	0.415023	61.3071	11.8858	0.889546	0.0213806		014_VU101B-A2A	65	0.0223665	0.0002125	0.0080557	8.44e-05	0.0079317	0.0001004	-0.761585	0.0029055	5.46866	0.0060639		014_VU101B-A2A	65	014_VU101B-A2a	groundmass	AZ16M	Klaudia Kuiper	28.201	0.08	0.0030745	0.1	0.974435	0.17	1	1e-13
	015_VU101B-A2A	80	4	0.00996011	3.2716	0.969813	3.16145	0.0204287	1.36697	1.6579	0.440428	14.2523	0.0850238	6.8509	0.132911	38.1764	0.732969	79.6617	1.02021	0.734798	0.0469095		015_VU101B-A2A	80	0.0223665	0.0002125	0.0080557	8.44e-05	0.0079317	0.0001004	-0.761585	0.0029055	5.46866	0.0060639		015_VU101B-A2A	80	015_VU101B-A2a	groundmass	AZ16M	Klaudia Kuiper	28.201	0.08	0.0030745	0.1	0.974435	0.17	1	1e-13
	017_VU101B-A2A	100	4	0.0529846	1.09415	3.41502	1.55377	0.0867213	0.580209	6.73933	0.201669	60.2084	0.038033	6.62795	0.0585359	36.9464	0.323028	74.1636	4.14736	0.84829	0.0265821		017_VU101B-A2A	100	0.0223665	0.0002125	0.0080557	8.44e-05	0.0079317	0.0001004	-0.761585	0.0029055	5.46866	0.0060639		017_VU101B-A2A	100	017_VU101B-A2a	groundmass	AZ16M	Klaudia Kuiper	28.201	0.08	0.0030745	0.1	0.974435	0.17	1	1e-13
			S	11.616	0.418575	52.739	0.479857	3.95662	0.180099	162.477	0.0676848	4541.23	0.0164002
	Information on Analysis and Constants Used in Calculations									Results		40(a)/36(a)	± 2s	40(r)/39(k)	± 2s	Age	± 2s	MSWD	39Ar(k)	K/Ca	± 2s
																(Ma)			(%,n)
	Sample = 002_VU101B-A2A				Age Equations = Min et al. (2000)					Age Plateau Error Mean				6.6074	0.123784	36.8331	0.687023	14.8866	98.7393	1.1449	0.226033
	Material = groundmass				Negative Intensities = Allowed										0.0187342		0.0186523	5.10283e-22	9
	Location = AZ16M				Decay Constant 40K = 5.460 ± 0.053 E-10 1/a					Full External Error							1.02855	2	2σ Confidence Limit
	Analyst = Klaudia Kuiper				Decay Constant 39Ar = 2.940 ± 0.016 E-07 1/h					Analytical Error							0.683141	3.85831	Error Magnification
	Project = VU101				Decay Constant 37Ar = 8.230 ± 0.012 E-04 1/h
	Mass Discrimination Law = LIN				Decay Constant 36Cl = 2.257 ± 0.015 E-06 1/a					Total Fusion Age				6.63104	0.180932	36.9635	1.00113		11	1.32445	0.0128368
	Irradiation = VU101				Decay Activity 40K(EC,β⁺) = 3.310 ± 0.030 1/gs										0.0272856		0.0270844
	J = 0.00307450 ± 0.00000307				Decay Activity 40K(β⁻) = 27.890 ± 0.150 1/gs					Full External Error							1.26187
	FCs = 28.201 ± 0.023 Ma				Atmospheric Ratio 40/36(a) = 298.56 ± 0.31					Analytical Error							0.998456
	IGSN = Undefined				Atmospheric Ratio 38/36(a) = 0.1885 ± 0.0003
	Preferred Age = Undefined				Production Ratio 39/37(ca) = 0.000673 ± 0.000004					Normal Isochron Error Chron		301.405	10.8813	6.54955	0.198519	36.5137	1.09816	16.4344	98.7393
	Classification = Undefined				Production Ratio 36/37(ca) = 0.000264 ± 0.000002								0.0361019		0.0303103		0.0300752	8.24324e-22	9
	Experiment Type = Undefined				Production Ratio 40/39(k) = 0.000860 ± 0.000070					Full External Error							1.33485	2.06904	2σ Confidence Limit
	Extraction Method = Undefined				Production Ratio 38/39(k) = 0.012110 ± 0.000030					Analytical Error							1.09578	4.05394	Error Magnification
	Heating = 45 sec				Production Ratio 36/38(cl) = 262.80 ± 1.71												32		Number of Iterations
	Isolation = 5.00 min				Scaling Ratio K/Ca = 0.430												6.42017e-05		Convergence
	Instrument = HELIX				Abundance Ratio 40K/K = 1.1700 ± 0.0100 E-04
	Lithology = Undefined				Atomic Weight K = 39.0983 ± 0.0001 g					Inverse Isochron Error Chron		301.322	10.9057	6.57112	0.197457	36.6328	1.09226	16.6161	98.7393
	Lat-Lon = Undefined - Undefined												0.036193		0.0300492		0.0298163	4.48381e-22	9
	Feature = Undefined									Full External Error							1.3314	2.06904	2σ Confidence Limit
										Analytical Error							1.08984	4.07629	Error Magnification
																	3		Number of Iterations
																	7.40552e-06		Convergence
																	0.683219		Spreading Factor
[truncated: 39 more columns]

## Sheet: Hidden Data
Double Line Plot Age Plateau			Double Line Plot K/Ca Plateau			X-Y Plot Normal Isochron		X-Y Plot Inverse Isochron		Error Ellipses Normal Isochron		Error Ellipses Inverse Isochron
Ar39k%	Line 1	Line 2	Ar39k%	Line 1	Line 2	X-axis	Y-axis	X-axis	Y-axis	X-axis	Y-axis	X-axis	Y-axis
0	-8.58284	-3.18954	0	0.569203	0.944785	30.9617	266.247	0.11629	0.00375591			0.121219	0.00375754
0.345621	-8.58284	-3.18954	0.345621	0.569203	0.944785	8.81519	330.857	0.0266435	0.00302246			0.121051	0.00370957
0.345621	23.9503	17.0801	0.345621	1.32005	1.03844	4.03497	327.512	0.0123201	0.00305332			0.120559	0.00366476
1.26071	23.9503	17.0801	1.26071	1.32005	1.03844	5.76019	336.337	0.0171262	0.00297321			0.119775	0.00362617
1.26071	33.813	46.1155	1.26071	1.47175	1.58427	14.5476	398.357	0.036519	0.00251031			0.118754	0.00359641
6.60495	33.813	46.1155	6.60495	1.47175	1.58427	42.4798	589.375	0.072076	0.00169671			0.117565	0.00357753
6.60495	40.8466	32.2776	6.60495	1.76448	1.66937	65.4845	744.249	0.0879874	0.00134364			0.11629	0.0035708
27.1172	40.8466	32.2776	27.1172	1.76448	1.66937	71.2352	752.07	0.0947189	0.00132966			0.115014	0.00357669
27.1172	36.5237	39.9294	27.1172	1.64386	1.72155	73.1028	771.715	0.0947277	0.00129582			0.113825	0.00359479
45.756	36.5237	39.9294	45.756	1.64386	1.72155	170.778	1468.55	0.116291	0.000680946			0.112804	0.00362387
45.756	38.7835	37.5148	45.756	1.4305	1.36327	129.352	1155.9	0.111906	0.000865129			0.112021	0.00366195
58.8105	38.7835	37.5148	58.8105	1.4305	1.36327							0.111528	0.00370643
58.8105	37.4893	38.3683	58.8105	1.2063	1.27168							0.11136	0.00375428
70.0439	37.4893	38.3683	70.0439	1.2063	1.27168							0.111528	0.00380225
70.0439	35.8928	35.1119	70.0439	1.36922	1.29162							0.112021	0.00384706
82.9467	35.8928	35.1119	82.9467	1.36922	1.29162							0.112804	0.00388565
82.9467	35.6731	36.5032	82.9467	0.868166	0.910927							0.113825	0.00391541
94.8324	35.6731	36.5032	94.8324	0.868166	0.910927							0.115014	0.00393429
94.8324	38.9093	37.4434	94.8324	0.781707	0.687888							0.116289	0.00394102
95.8526	38.9093	37.4434	95.8526	0.781707	0.687888							0.117565	0.00393514
95.8526	36.6234	37.2695	95.8526	0.821708	0.874872							0.118754	0.00391703
100	36.6234	37.2695	100	0.821708	0.874872							0.119775	0.00388795
												0.120558	0.00384987
												0.121051	0.00380539
												0.121219	0.00375754
												0.0271008	0.00302258
												0.0270852	0.00300849
												0.0270396	0.00299536
												0.0269669	0.00298408
												0.0268722	0.00297541
												0.0267619	0.00296995
												0.0266435	0.00296806
												0.0265252	0.00296989
												0.0264149	0.00297529
												0.0263202	0.00298391
												0.0262475	0.00299515
												0.0262018	0.00300826
												0.0261862	0.00302233
												0.0262018	0.00303642
												0.0262475	0.00304955
												0.0263201	0.00306083
												0.0264149	0.0030695
												0.0265251	0.00307496
												0.0266435	0.00307685
												0.0267619	0.00307503
												0.0268722	0.00306962
												0.0269669	0.003061
												0.0270396	0.00304976
												0.0270852	0.00303665
												0.0271008	0.00302258
												0.0123692	0.00305529
												0.012368	0.00304343
												0.0123636	0.00303224
												0.0123561	0.00302249
												0.0123462	0.00301484
												0.0123346	0.00300982
												0.0123219	0.00300776
												0.0123091	0.0030088
												0.0122971	0.00301288
												0.0122866	0.00301971
												0.0122784	0.00302884
												0.012273	0.00303963
												0.0122709	0.00305136
												0.0122721	0.00306322
												0.0122766	0.00307441
												0.012284	0.00308416
												0.0122939	0.0030918
												0.0123056	0.00309683
												0.0123183	0.00309889
												0.012331	0.00309785
												0.0123431	0.00309377
												0.0123536	0.00308693
												0.0123617	0.00307781
												0.0123671	0.00306701
												0.0123692	0.00305529
												0.0171875	0.00297398
												0.0171855	0.00296255
												0.0171795	0.00295185
												0.0171699	0.0029426
												0.0171573	0.00293544
												0.0171426	0.00293085
												0.0171268	0.00292915
												0.0171109	0.00293045
												0.0170961	0.00293467
												0.0170833	0.00294151
												0.0170735	0.00295051
												0.0170672	0.00296106
												0.017065	0.00297243
												0.0170669	0.00298386
												0.0170729	0.00299457
												0.0170825	0.00300381
												0.0170951	0.00301097
												0.0171098	0.00301556
												0.0171257	0.00301726
												0.0171415	0.00301596
												0.0171564	0.00301175
												0.0171691	0.00300491
												0.017179	0.00299591
												0.0171852	0.00298536
												0.0171875	0.00297398
												0.0366502	0.00251058
												0.0366457	0.00250092
												0.0366326	0.00249191
												0.0366118	0.00248415
												0.0365847	0.00247817
												0.0365531	0.00247439
												0.0365191	0.00247305
												0.0364852	0.00247425
												0.0364535	0.00247791
												0.0364264	0.00248378
												0.0364055	0.00249145
												0.0363924	0.00250041
												0.0363879	0.00251005
												0.0363924	0.0025197
												0.0364054	0.00252872
												0.0364263	0.00253648
												0.0364534	0.00254246
												0.036485	0.00254624
												0.036519	0.00254758
												0.0365529	0.00254638
												0.0365845	0.00254272
												0.0366117	0.00253685
												0.0366326	0.00252917
												0.0366457	0.00252021
												0.0366502	0.00251058
												0.072333	0.0016969
												0.0723242	0.00168994
												0.0722986	0.00168344
												0.0722577	0.00167785
												0.0722045	0.00167354
												0.0721425	0.00167081
												0.072076	0.00166985
												0.0720095	0.00167071
												0.0719475	0.00167335
												0.0718942	0.00167758
												0.0718534	0.00168312
												0.0718277	0.00168958
												0.0718189	0.00169652
												0.0718277	0.00170348
												0.0718534	0.00170998
												0.0718942	0.00171558
												0.0719474	0.00171988
												0.0720094	0.00172261
												0.0720759	0.00172358
												0.0721425	0.00172271
												0.0722045	0.00172007
												0.0722577	0.00171584
												0.0722985	0.00171031
												0.0723242	0.00170385
												0.072333	0.0016969
												0.0883067	0.00134382
												0.0882958	0.0013381
												0.0882639	0.00133275
												0.0882132	0.00132815
												0.0881471	0.0013246
												0.08807	0.00132235
												0.0879874	0.00132155
												0.0879047	0.00132225
												0.0878277	0.00132442
												0.0877616	0.00132789
												0.0877108	0.00133243
												0.0876789	0.00133774
												0.087668	0.00134345
												0.0876789	0.00134918
												0.0877108	0.00135452
												0.0877616	0.00135913
												0.0878277	0.00136268
												0.0879047	0.00136493
												0.0879874	0.00136573
												0.08807	0.00136502
												0.088147	0.00136286
												0.0882132	0.00135939
												0.0882639	0.00135484
												0.0882958	0.00134953
												0.0883067	0.00134382
												0.0950598	0.00132981
												0.0950482	0.00132437
												0.0950141	0.0013193
												0.0949599	0.00131493
												0.0948893	0.00131156
												0.0948071	0.00130943
												0.0947189	0.00130868
												0.0946306	0.00130936
												0.0945484	0.00131142
												0.0944778	0.00131472
												0.0944236	0.00131905
												0.0943895	0.00132409
												0.0943779	0.00132952
												0.0943895	0.00133496
												0.0944236	0.00134003
												0.0944778	0.0013444
												0.0945484	0.00134777
												0.0946306	0.0013499
												0.0947188	0.00135065
												0.0948071	0.00134997
												0.0948893	0.00134791
												0.0949599	0.00134461
												0.0950141	0.00134028
												0.0950482	0.00133524
												0.0950598	0.00132981
												0.0950654	0.001296
												0.0950539	0.00129018
												0.0950201	0.00128474
												0.0949665	0.00128005
												0.0948966	0.00127644
												0.0948151	0.00127415
												0.0947277	0.00127334
												0.0946403	0.00127406
												0.0945589	0.00127626
												0.094489	0.00127979
												0.0944353	0.00128442
												0.0944016	0.00128982
												0.0943901	0.00129563
												0.0944016	0.00130145
												0.0944353	0.00130689
												0.0944889	0.00131158
												0.0945589	0.00131519
												0.0946403	0.00131748
												0.0947277	0.00131829
												0.0948151	0.00131758
												0.0948965	0.00131537
												0.0949665	0.00131184
												0.0950201	0.00130721
												0.0950539	0.00130181
												0.0950654	0.001296
												0.117335	0.000681166
												0.117299	0.000669315
												0.117195	0.000658256
												0.117029	0.000648744
												0.116813	0.000641426
												0.116561	0.000636802
												0.116291	0.000635186
												0.116021	0.000636688
												0.115769	0.000641207
												0.115553	0.000648433
												0.115387	0.000657875
												0.115283	0.00066889
												0.115247	0.000680726
												0.115283	0.000692577
												0.115387	0.000703635
												0.115553	0.000713147
												0.115769	0.000720465
												0.116021	0.00072509
												0.116291	0.000726706
												0.116561	0.000725203
												0.116813	0.000720685
												0.117029	0.000713458
												0.117195	0.000704016
												0.117299	0.000693002
												0.117335	0.000681166
												0.112365	0.000865251
												0.11235	0.000860258
												0.112304	0.000855596
												0.112231	0.000851585
												0.112136	0.000848496
												0.112025	0.000846541
												0.111906	0.000845852
												0.111787	0.000846477
												0.111676	0.000848374
												0.111581	0.000851412
												0.111508	0.000855385
												0.111462	0.000860022
												0.111447	0.000865007
												0.111462	0.00087
												0.111508	0.000874661
												0.111581	0.000878673
												0.111676	0.000881762
												0.111787	0.000883717
												0.111906	0.000884406
												0.112025	0.000883781
												0.112136	0.000881884
												0.112231	0.000878846
												0.112304	0.000874873
												0.11235	0.000870236
												0.112365	0.000865251
