# Supplementary material for: Exploring a link between the Middle Eocene Climatic Optimum and Neotethys continental arc flare-up
Source: Copernicus journal article supplement (doi:10.5194/cp-17-229-2021), 2021-01-18
Supplement: Supplementary file 3 [file S12_VU101B-A2db.xls]

## Sheet: Summary Table
	Relative Abundances			36Ar [fA]	%1s	37Ar [fA]	%1s	38Ar [fA]	%1s	39Ar [fA]	%1s	40Ar [fA]	%1s	40(r)/39(k)	± 1s	Age	± 1s	40Ar(r)	39Ar(k)	K/Ca	± 1s		Procedure Blanks		36Ar [fA]	1s	37Ar [fA]	1s	38Ar [fA]	1s	39Ar [fA]	1s	40Ar [fA]	1s		Sample Parameters		Sample	Material	Location	Analyst	Standard	%1s	J	%1s	MDF	%1s	Volume Ratio	Sensitivity
																(Ma)		(%)	(%)																							(in Ma)							(mol/volt)
	028_VU101B-A2B	10		0.0122878	3.1006	0.0475666	61.9786	0.00206317	10.5794	0.0142348	54.0357	3.55586	0.249988	-7.67867	9.05144	-43.7573	52.2017	-3.06701	0.0681611	0.128393	0.105676		028_VU101B-A2B	10	0.0207215	0.0002726	0.0080213	8.65e-05	0.0075953	0.0001246	-0.772371	0.0056739	5.25295	0.0047343		028_VU101B-A2B	10	028_VU101B-A2b	groundmass	AZ16M	Klaudia Kuiper	28.201	0.08	0.0030745	0.1	0.974435	0.17	1	1e-13
	029_VU101B-A2B	12		0.0208215	2.60829	0.0220298	185.019	0.00344554	6.15014	0.0173607	45.605	6.27307	0.147695	3.36328	9.49701	18.8412	52.9298	0.929991	0.0832451	0.338575	0.645211		029_VU101B-A2B	12	0.0207215	0.0002726	0.0080213	8.65e-05	0.0075953	0.0001246	-0.772371	0.0056739	5.25295	0.0047343		029_VU101B-A2B	12	029_VU101B-A2b	groundmass	AZ16M	Klaudia Kuiper	28.201	0.08	0.0030745	0.1	0.974435	0.17	1	1e-13
	030_VU101B-A2B	14		0.0339222	1.53781	0.119516	33.4373	0.00663541	3.62424	0.0329748	20.8637	10.2302	0.0969438	3.39833	4.8089	19.0366	26.7986	1.0927	0.157864	0.118349	0.0466764		030_VU101B-A2B	14	0.0207215	0.0002726	0.0080213	8.65e-05	0.0075953	0.0001246	-0.772371	0.0056739	5.25295	0.0047343		030_VU101B-A2B	14	030_VU101B-A2b	groundmass	AZ16M	Klaudia Kuiper	28.201	0.08	0.0030745	0.1	0.974435	0.17	1	1e-13
	032_VU101B-A2B	15		0.0633072	1.33397	0.0279368	114.915	0.0120843	2.08641	0.0390081	19.5145	19.3402	0.0712979	11.3189	6.86192	62.6519	37.3391	2.28186	0.187115	0.600119	0.699508		032_VU101B-A2B	15	0.0216432	0.000188	0.008221	0.0001239	0.0078621	0.0001263	-0.73662	0.0056612	5.48512	0.0052507		032_VU101B-A2B	15	032_VU101B-A2b	groundmass	AZ16M	Klaudia Kuiper	28.201	0.08	0.0030745	0.1	0.974435	0.17	1	1e-13
	033_VU101B-A2B	16		0.0744857	1.05856	-0.00366024	937.652	0.015088	2.46294	0.100848	7.79362	23.4117	0.0751627	11.6295	2.52067	64.3415	13.7035	5.00966	0.483994	-11.8477	111.095		033_VU101B-A2B	16	0.0216432	0.000188	0.008221	0.0001239	0.0078621	0.0001263	-0.73662	0.0056612	5.48512	0.0052507		033_VU101B-A2B	16	033_VU101B-A2b	groundmass	AZ16M	Klaudia Kuiper	28.201	0.08	0.0030745	0.1	0.974435	0.17	1	1e-13
	034_VU101B-A2B	17	4	0.113158	0.934489	-0.00681561	678.892	0.0232759	1.20234	0.199677	4.21797	35.1709	0.0444197	6.93933	1.61954	38.664	8.92895	3.93979	0.958299	-12.598	85.5286		034_VU101B-A2B	17	0.0216432	0.000188	0.008221	0.0001239	0.0078621	0.0001263	-0.73662	0.0056612	5.48512	0.0052507		034_VU101B-A2B	17	034_VU101B-A2b	groundmass	AZ16M	Klaudia Kuiper	28.201	0.08	0.0030745	0.1	0.974435	0.17	1	1e-13
	036_VU101B-A2B	18	4	0.162143	0.847247	0.169516	25.4399	0.0340973	0.97921	0.363253	2.06469	50.6047	0.0408371	6.08148	1.14629	33.9283	6.33616	4.36406	1.74275	0.921151	0.235111		036_VU101B-A2B	18	0.0201702	0.0002407	0.0079522	0.0001351	0.0073772	0.00011	-0.773845	0.0036907	5.16851	0.0051671		036_VU101B-A2B	18	036_VU101B-A2b	groundmass	AZ16M	Klaudia Kuiper	28.201	0.08	0.0030745	0.1	0.974435	0.17	1	1e-13
	037_VU101B-A2B	19	4	0.338964	0.780173	0.217866	16.6461	0.0695925	0.701056	0.599245	1.16685	105.365	0.0500912	6.97877	1.33495	38.8814	7.35908	3.96807	2.87515	1.18243	0.197313		037_VU101B-A2B	19	0.0201702	0.0002407	0.0079522	0.0001351	0.0073772	0.00011	-0.773845	0.0036907	5.16851	0.0051671		037_VU101B-A2B	19	037_VU101B-A2b	groundmass	AZ16M	Klaudia Kuiper	28.201	0.08	0.0030745	0.1	0.974435	0.17	1	1e-13
	038_VU101B-A2B	20	4	0.39557	0.769313	0.282608	13.2508	0.0812367	0.719476	0.715654	1.18887	122.588	0.0342522	6.30162	1.28499	35.1447	7.09812	3.67783	3.4336	1.08861	0.144829		038_VU101B-A2B	20	0.0201702	0.0002407	0.0079522	0.0001351	0.0073772	0.00011	-0.773845	0.0036907	5.16851	0.0051671		038_VU101B-A2B	20	038_VU101B-A2b	groundmass	AZ16M	Klaudia Kuiper	28.201	0.08	0.0030745	0.1	0.974435	0.17	1	1e-13
	040_VU101B-A2B	21	4	0.833237	0.753628	0.418628	10.6631	0.16571	0.495696	1.13365	0.691567	257.006	0.0321431	7.29428	1.67222	40.6199	9.20955	3.2167	5.43919	1.16416	0.124396		040_VU101B-A2B	21	0.021575	0.0002182	0.0078896	0.0001103	0.0074321	9.52e-05	-0.769873	0.004582	5.20918	0.0052716		040_VU101B-A2B	21	040_VU101B-A2b	groundmass	AZ16M	Klaudia Kuiper	28.201	0.08	0.0030745	0.1	0.974435	0.17	1	1e-13
	041_VU101B-A2B	23	4	1.6199	0.74852	0.669784	6.14071	0.320069	0.47991	1.90682	0.431688	498.293	0.0314084	7.71549	1.91924	42.9382	10.5566	2.95179	9.14891	1.22388	0.0753408		041_VU101B-A2B	23	0.021575	0.0002182	0.0078896	0.0001103	0.0074321	9.52e-05	-0.769873	0.004582	5.20918	0.0052716		041_VU101B-A2B	23	041_VU101B-A2b	groundmass	AZ16M	Klaudia Kuiper	28.201	0.08	0.0030745	0.1	0.974435	0.17	1	1e-13
	042_VU101B-A2B	25	4	2.53747	0.752154	1.31365	2.5285	0.506129	0.373934	3.4621	0.278931	783.489	0.0383324	7.51235	1.66436	41.8205	9.16029	3.31873	16.6108	1.13296	0.0288209		042_VU101B-A2B	25	0.021575	0.0002182	0.0078896	0.0001103	0.0074321	9.52e-05	-0.769873	0.004582	5.20918	0.0052716		042_VU101B-A2B	25	042_VU101B-A2b	groundmass	AZ16M	Klaudia Kuiper	28.201	0.08	0.0030745	0.1	0.974435	0.17	1	1e-13
	044_VU101B-A2B	28	4	2.29988	0.741332	1.88869	2.44335	0.485157	0.412197	5.62993	0.203232	728.741	0.0307436	7.5029	0.914215	41.7684	5.03178	5.7951	27.0127	1.28148	0.0314194		044_VU101B-A2B	28	0.0208701	0.0001213	0.0080134	8.63e-05	0.0075828	0.0001329	-0.776398	0.0033144	5.32056	0.0052778		044_VU101B-A2B	28	044_VU101B-A2b	groundmass	AZ16M	Klaudia Kuiper	28.201	0.08	0.0030745	0.1	0.974435	0.17	1	1e-13
	045_VU101B-A2B	31	4	1.55582	0.751394	2.26466	1.91033	0.358948	0.434929	6.62736	0.247887	512.008	0.0355167	7.19553	0.532789	40.0759	2.93515	9.31166	31.7983	1.25807	0.0242349		045_VU101B-A2B	31	0.0208701	0.0001213	0.0080134	8.63e-05	0.0075828	0.0001329	-0.776398	0.0033144	5.32056	0.0052778		045_VU101B-A2B	31	045_VU101B-A2b	groundmass	AZ16M	Klaudia Kuiper	28.201	0.08	0.0030745	0.1	0.974435	0.17	1	1e-13
			S	10.061	0.314215	7.43198	1.98862	2.08353	0.180695	20.8421	0.163459	3156.08	0.0145462
	Information on Analysis and Constants Used in Calculations									Results		40(a)/36(a)	± 1s	40(r)/39(k)	± 1s	Age	± 1s	MSWD	39Ar(k)	K/Ca	± 1s
																(Ma)			(%,n)
	Sample = 028_VU101B-A2B				Age Equations = Min et al. (2000)					Age Plateau Overestimated Error				7.07706	0.353146	39.4232	1.94658	0.199186	99.0196	1.22159	0.0230755
	Material = groundmass				Negative Intensities = Allowed										0.0499001		0.0493765	0.991044	9
	Location = AZ16M				Decay Constant 40K = 5.460 ± 0.053 E-10 1/a					Full External Error							1.98917	1.5	1σ Confidence Limit
	Analyst = Klaudia Kuiper				Decay Constant 39Ar = 2.940 ± 0.016 E-07 1/h					Analytical Error							1.94619	1	Error Magnification
	Project = VU101				Decay Constant 37Ar = 8.230 ± 0.012 E-04 1/h
	Mass Discrimination Law = LIN				Decay Constant 36Cl = 2.257 ± 0.015 E-06 1/a					Total Fusion Age				7.33518	0.457986	40.8451	2.52232		14	1.2056	0.0240556
	Irradiation = VU101				Decay Activity 40K(EC,β⁺) = 3.310 ± 0.030 1/gs										0.0624368		0.0617532
	J = 0.00307450 ± 0.00000307				Decay Activity 40K(β⁻) = 27.890 ± 0.150 1/gs					Full External Error							2.55772
	FCs = 28.201 ± 0.023 Ma				Atmospheric Ratio 40/36(a) = 298.56 ± 0.31					Analytical Error							2.522
	IGSN = Undefined				Atmospheric Ratio 38/36(a) = 0.1885 ± 0.0003
	Preferred Age = Undefined				Production Ratio 39/37(ca) = 0.000673 ± 0.000004					Normal Isochron Overestimated Error		298.448	1.89985	7.12023	0.852872	39.661	4.69972	0.232213	99.0196
	Classification = Undefined				Production Ratio 36/37(ca) = 0.000264 ± 0.000002								0.00636576		0.119782		0.118497	0.977645	9
	Experiment Type = Undefined				Production Ratio 40/39(k) = 0.000860 ± 0.000070					Full External Error							4.71774	1.53452	1σ Confidence Limit
	Extraction Method = Undefined				Production Ratio 38/39(k) = 0.012110 ± 0.000030					Analytical Error							4.69956	1	Error Magnification
	Heating = 45 sec				Production Ratio 36/38(cl) = 262.80 ± 1.71												3		Number of Iterations
	Isolation = 5.00 min				Scaling Ratio K/Ca = 0.430												3.20394e-05		Convergence
	Instrument = HELIX				Abundance Ratio 40K/K = 1.1700 ± 0.0100 E-04
	Lithology = Undefined				Atomic Weight K = 39.0983 ± 0.0001 g					Inverse Isochron Overestimated Error		298.456	1.89752	7.12081	0.841183	39.6643	4.63531	0.230542	99.0196
	Lat-Lon = Undefined - Undefined												0.0063578		0.11813		0.116864	0.978107	9
	Feature = Undefined									Full External Error							4.65357	1.53452	1σ Confidence Limit
										Analytical Error							4.63514	1	Error Magnification
																	2		Number of Iterations
																	0.000185245		Convergence
																	0.0649071		Spreading Factor
[truncated: 39 more columns]

## Sheet: Hidden Data
Double Line Plot Age Plateau			Double Line Plot K/Ca Plateau			X-Y Plot Normal Isochron		X-Y Plot Inverse Isochron		Error Ellipses Normal Isochron		Error Ellipses Inverse Isochron
Ar39k%	Line 1	Line 2	Ar39k%	Line 1	Line 2	X-axis	Y-axis	X-axis	Y-axis	X-axis	Y-axis	X-axis	Y-axis
0	-95.959	8.44434	0	0.0227169	0.234069	1.15703	289.676	0.00399421	0.00345214			0.0061574	0.00345218
0.0681611	-95.959	8.44434	0.0681611	0.0227169	0.234069	0.83331	301.363	0.00276514	0.00331826			0.0060837	0.00342435
0.0681611	71.7711	-34.0886	0.0681611	0.983786	-0.306636	0.970601	301.858	0.00321542	0.00331281			0.00586759	0.00339841
0.151406	71.7711	-34.0886	0.151406	0.983786	-0.306636	0.615946	305.532	0.00201598	0.00327298			0.00552382	0.00337614
0.151406	-7.76206	45.8352	0.151406	0.0716724	0.165025	1.35394	314.306	0.00430771	0.00318162			0.00507581	0.00335905
0.30927	-7.76206	45.8352	0.30927	0.0716724	0.165025	1.7646	310.805	0.00567751	0.00321745			0.00455409	0.0033483
0.30927	99.9911	25.3128	0.30927	1.29963	-0.099389	2.24024	312.184	0.00717603	0.00320324			0.00399421	0.00334462
0.496385	99.9911	25.3128	0.496385	1.29963	-0.099389	1.76774	310.897	0.00568595	0.0032165			0.00343434	0.00334827
0.496385	50.6379	78.045	0.496385	-122.942	99.2468	1.80903	309.96	0.00583634	0.00322622			0.00291262	0.00335901
0.980379	50.6379	78.045	0.980379	-122.942	99.2468	1.36038	308.483	0.00440991	0.00324167			0.0024646	0.00337608
0.980379	47.5929	29.735	0.980379	72.9306	-98.1267	1.17698	307.641	0.00382581	0.00325054			0.00212083	0.00339835
1.93868	47.5929	29.735	1.93868	72.9306	-98.1267	1.36423	308.809	0.00441771	0.00323825			0.00190473	0.00342427
1.93868	27.5921	40.2645	1.93868	0.68604	1.15626	2.4479	316.926	0.00772387	0.00315531			0.00183102	0.0034521
3.68143	27.5921	40.2645	3.68143	0.68604	1.15626	4.26039	329.216	0.012941	0.00303752			0.00190473	0.00347993
3.68143	46.2405	31.5223	3.68143	1.37975	0.985121							0.00212083	0.00350586
6.55658	46.2405	31.5223	6.55658	1.37975	0.985121							0.0024646	0.00352813
6.55658	28.0466	42.2429	6.55658	0.943779	1.23344							0.00291261	0.00354523
9.99018	28.0466	42.2429	9.99018	0.943779	1.23344							0.00343433	0.00355598
9.99018	49.8294	31.4103	9.99018	1.28856	1.03976							0.00399421	0.00355965
15.4294	49.8294	31.4103	15.4294	1.28856	1.03976							0.00455408	0.003556
15.4294	32.3815	53.4948	15.4294	1.14854	1.29923							0.0050758	0.00354527
24.5783	32.3815	53.4948	24.5783	1.14854	1.29923							0.00552382	0.00352819
24.5783	50.9808	32.6602	24.5783	1.16178	1.10414							0.00586759	0.00350593
41.1891	50.9808	32.6602	41.1891	1.16178	1.10414							0.00608369	0.00348
41.1891	36.7367	46.8002	41.1891	1.25006	1.3129							0.0061574	0.00345218
68.2017	36.7367	46.8002	68.2017	1.25006	1.3129
68.2017	43.0111	37.1408	68.2017	1.28231	1.23384							0.00402728	0.00331828
100	43.0111	37.1408	100	1.28231	1.23384							0.00398427	0.00329583
												0.00385818	0.00327491
												0.00365761	0.00325695
												0.00339621	0.00324316
												0.00309181	0.00323449
												0.00276514	0.00323153
												0.00243848	0.00323448
												0.00213407	0.00324314
												0.00187268	0.00325692
												0.0016721	0.00327488
												0.00154601	0.0032958
												0.00150301	0.00331825
												0.00154601	0.00334069
												0.0016721	0.00336161
												0.00187267	0.00337958
												0.00213407	0.00339336
												0.00243847	0.00340203
												0.00276514	0.00340499
												0.0030918	0.00340204
												0.00339621	0.00339338
												0.0036576	0.0033796
												0.00385818	0.00336164
												0.00398427	0.00334072
												0.00402728	0.00331828
												0.00388793	0.00331283
												0.00386501	0.0032996
												0.00379783	0.00328727
												0.00369095	0.00327669
												0.00355167	0.00326856
												0.00338948	0.00326345
												0.00321542	0.00326171
												0.00304136	0.00326345
												0.00287917	0.00326855
												0.00273989	0.00327666
												0.00263301	0.00328725
												0.00256583	0.00329957
												0.00254291	0.0033128
												0.00256583	0.00332602
												0.00263301	0.00333835
												0.00273988	0.00334894
												0.00287916	0.00335706
												0.00304136	0.00336217
												0.00321542	0.00336391
												0.00338948	0.00336218
												0.00355167	0.00335708
												0.00369095	0.00334896
												0.00379783	0.00333838
												0.00386501	0.00332605
												0.00388793	0.00331283
												0.00240958	0.00327299
												0.00239617	0.00326167
												0.00235685	0.00325112
												0.0022943	0.00324207
												0.00221278	0.00323511
												0.00211785	0.00323074
												0.00201598	0.00322925
												0.00191411	0.00323074
												0.00181918	0.00323511
												0.00173766	0.00324205
												0.00167511	0.00325111
												0.00163579	0.00326165
												0.00162238	0.00327297
												0.00163579	0.00328429
												0.00167511	0.00329484
												0.00173766	0.0033039
												0.00181918	0.00331085
												0.00191411	0.00331522
												0.00201598	0.00331671
												0.00211785	0.00331522
												0.00221278	0.00331086
												0.0022943	0.00330391
												0.00235685	0.00329485
												0.00239617	0.00328431
												0.00240958	0.00327299
												0.00464345	0.00318164
												0.00463201	0.0031729
												0.00459847	0.00316475
												0.00454512	0.00315776
												0.00447558	0.00315239
												0.00439461	0.00314901
												0.00430772	0.00314785
												0.00422082	0.00314899
												0.00413985	0.00315236
												0.00407031	0.00315772
												0.00401696	0.00316471
												0.00398342	0.00317285
												0.00397198	0.00318159
												0.00398342	0.00319033
												0.00401696	0.00319848
												0.00407031	0.00320548
												0.00413984	0.00321085
												0.00422082	0.00321423
												0.00430771	0.00321538
												0.00439461	0.00321424
												0.00447558	0.00321087
												0.00454511	0.00320551
												0.00459847	0.00319852
												0.00463201	0.00319038
												0.00464345	0.00318164
												0.00591699	0.00321747
												0.00590883	0.00320967
												0.00588491	0.00320241
												0.00584685	0.00319618
												0.00579725	0.00319139
												0.00573949	0.00318838
												0.00567751	0.00318735
												0.00561552	0.00318837
												0.00555777	0.00319137
												0.00550817	0.00319615
												0.00547011	0.00320239
												0.00544618	0.00320964
												0.00543802	0.00321743
												0.00544618	0.00322523
												0.0054701	0.00323249
												0.00550816	0.00323872
												0.00555776	0.00324351
												0.00561552	0.00324652
												0.0056775	0.00324755
												0.00573949	0.00324653
												0.00579725	0.00324353
												0.00584685	0.00323875
												0.0058849	0.00323251
												0.00590883	0.00322526
												0.00591699	0.00321747
												0.00732427	0.00320327
												0.00731922	0.00319623
												0.00730441	0.00318967
												0.00728086	0.00318404
												0.00725016	0.00317971
												0.0072144	0.00317699
												0.00717604	0.00317606
												0.00713767	0.00317698
												0.00710192	0.00317969
												0.00707121	0.003184
												0.00704765	0.00318963
												0.00703284	0.00319618
												0.00702779	0.00320321
												0.00703284	0.00321025
												0.00704765	0.00321681
												0.00707121	0.00322244
												0.00710191	0.00322676
												0.00713766	0.00322949
												0.00717603	0.00323042
												0.00721439	0.0032295
												0.00725015	0.00322679
												0.00728085	0.00322248
												0.00730441	0.00321685
												0.00731922	0.0032103
												0.00732427	0.00320327
												0.00575237	0.00321658
												0.00575012	0.00321007
												0.00574349	0.003204
												0.00573294	0.00319878
												0.00571919	0.00319476
												0.00570317	0.00319223
												0.00568598	0.00319135
												0.00566878	0.00319219
												0.00565276	0.00319468
												0.005639	0.00319866
												0.00562844	0.00320386
												0.00562179	0.00320992
												0.00561952	0.00321642
												0.00562178	0.00322293
												0.00562841	0.00322901
												0.00563896	0.00323423
												0.00565271	0.00323824
												0.00566873	0.00324078
												0.00568592	0.00324165
												0.00570311	0.00324082
												0.00571913	0.00323832
												0.00573289	0.00323434
												0.00574346	0.00322915
												0.0057501	0.00322309
												0.00575237	0.00321658
												0.00590578	0.00322626
												0.00590342	0.00321983
												0.00589648	0.00321383
												0.00588545	0.00320868
												0.00587107	0.00320472
												0.00585433	0.00320223
												0.00583636	0.00320138
												0.00581839	0.00320221
												0.00580164	0.00320469
												0.00578726	0.00320863
												0.00577622	0.00321377
												0.00576928	0.00321976
												0.00576691	0.00322619
												0.00576927	0.00323262
												0.00577621	0.00323862
												0.00578724	0.00324377
												0.00580162	0.00324773
												0.00581836	0.00325022
												0.00583633	0.00325107
												0.0058543	0.00325024
												0.00587105	0.00324776
												0.00588543	0.00324382
												0.00589647	0.00323868
												0.00590341	0.00323269
												0.00590578	0.00322626
												0.00444045	0.0032418
												0.00443943	0.00323547
												0.00443641	0.00322956
												0.00443158	0.00322447
												0.00442527	0.00322056
												0.00441792	0.00321808
												0.00441002	0.00321721
												0.00440211	0.00321801
												0.00439473	0.00322042
												0.00438839	0.00322428
												0.00438351	0.00322933
												0.00438044	0.00323521
												0.00437937	0.00324153
												0.00438038	0.00324787
												0.00438341	0.00325378
												0.00438824	0.00325887
												0.00439455	0.00326278
												0.0044019	0.00326526
												0.0044098	0.00326612
												0.00441771	0.00326533
												0.00442508	0.00326292
												0.00443142	0.00325906
												0.0044363	0.00325401
												0.00443938	0.00324813
												0.00444045	0.0032418
												0.0038259	0.0032749
												0.00383019	0.00327405
												0.00383417	0.0032716
												0.00383759	0.00326772
												0.0038402	0.00326266
												0.00384183	0.00325678
												0.00384237	0.00325048
												0.00384178	0.00324418
												0.00384011	0.00323831
												0.00383745	0.00323328
												0.00383401	0.00322942
												0.00383	0.003227
												0.00382571	0.00322619
												0.00382143	0.00322703
												0.00381745	0.00322948
												0.00381403	0.00323337
												0.00381142	0.00323842
												0.00380979	0.0032443
												0.00380925	0.00325061
												0.00380983	0.00325691
												0.00381151	0.00326278
												0.00381416	0.00326781
												0.00381761	0.00327167
												0.00382161	0.00327408
												0.0038259	0.0032749
												0.00441783	0.00326264
												0.00442104	0.0032618
												0.00442403	0.00325935
												0.00442659	0.00325546
												0.00442854	0.0032504
												0.00442976	0.00324451
												0.00443015	0.00323819
												0.0044297	0.00323188
												0.00442843	0.00322601
												0.00442643	0.00322096
												0.00442383	0.0032171
												0.00442082	0.00321468
												0.00441759	0.00321386
												0.00441438	0.00321471
												0.00441139	0.00321716
												0.00440883	0.00322105
												0.00440688	0.00322611
												0.00440566	0.003232
												0.00440527	0.00323831
												0.00440572	0.00324462
												0.00440699	0.0032505
												0.004409	0.00325554
												0.00441159	0.00325941
												0.0044146	0.00326183
												0.00441783	0.00326264
												0.00772405	0.00317872
												0.00772815	0.00317789
												0.00773197	0.00317552
												0.00773523	0.00317178
												0.00773771	0.00316691
												0.00773925	0.00316125
												0.00773975	0.00315518
												0.00773916	0.00314913
												0.00773753	0.00314349
												0.00773497	0.00313866
												0.00773165	0.00313497
												0.0077278	0.00313266
												0.00772369	0.00313189
												0.00771958	0.00313272
												0.00771577	0.00313509
												0.00771251	0.00313884
												0.00771003	0.00314371
												0.00770848	0.00314937
												0.00770799	0.00315543
												0.00770858	0.00316149
												0.00771021	0.00316712
												0.00771277	0.00317195
												0.00771609	0.00317565
												0.00771994	0.00317796
												0.00772405	0.00317872
												0.0129735	0.00303783
												0.0129724	0.0030319
												0.0129692	0.00302636
												0.0129641	0.00302157
												0.0129574	0.00301788
												0.0129496	0.00301552
												0.0129413	0.00301467
												0.0129329	0.00301537
												0.012925	0.00301758
												0.0129183	0.00302114
												0.0129131	0.00302583
												0.0129098	0.00303131
												0.0129086	0.00303722
												0.0129097	0.00304314
												0.0129129	0.00304869
												0.012918	0.00305347
												0.0129246	0.00305716
												0.0129324	0.00305952
												0.0129408	0.00306038
												0.0129492	0.00305968
												0.0129571	0.00305747
												0.0129638	0.0030539
												0.012969	0.00304921
												0.0129723	0.00304373
												0.0129735	0.00303783
