# Supplementary material for: Exploring a link between the Middle Eocene Climatic Optimum and Neotethys continental arc flare-up
Source: Copernicus journal article supplement (doi:10.5194/cp-17-229-2021), 2021-01-18
Supplement: Supplementary file 4 [file S13_VU101B-A2f.xls]

## Sheet: Summary Table
	Relative Abundances			36Ar [fA]	%1s	37Ar [fA]	%1s	38Ar [fA]	%1s	39Ar [fA]	%1s	40Ar [fA]	%1s	40(r)/39(k)	± 2s	Age	± 2s	40Ar(r)	39Ar(k)	K/Ca	± 2s		Procedure Blanks		36Ar [fA]	1s	37Ar [fA]	1s	38Ar [fA]	1s	39Ar [fA]	1s	40Ar [fA]	1s		Sample Parameters		Sample	Material	Location	Analyst	Standard	%1s	J	%1s	MDF	%1s	Volume Ratio	Sensitivity
																(Ma)		(%)	(%)																							(in Ma)							(mol/volt)
	01A_VU101B-A2C_1_1	10		0.0801752	0.90726	1.5862	5.44771	0.0192674	1.18573	0.0628058	16.7741	22.2297	0.113005	-25.623	11.2837	-150.287	68.9754	-7.11625	0.0566759	0.0167365	0.00599596		01A_VU101B-A2C_1_1	10	0.0143301	0.0001206	0.0085802	7.22e-05	0.0066492	8.88e-05	-0.0611978	0.01027	3.95223	0.0122873		01A_VU101B-A2C_1_1	10	01a_VU101B-A2c_1	groundmass	AZ16M	Klaudia Kuiper	28.201	0.08	0.0030745	0.1	0.977051	0.17	1	1e-13
	01B_VU101B-A2C_1_1	15		0.134528	0.846013	1.5954	5.56138	0.0327023	0.978319	0.062821	16.77	38.9153	0.105704	-18.1807	12.7777	-105.35	76.2138	-2.88475	0.0566842	0.0166424	0.00597308		01B_VU101B-A2C_1_1	15	0.0143301	0.0001206	0.0085802	7.22e-05	0.0066492	8.88e-05	-0.0611978	0.01027	3.95223	0.0122873		01B_VU101B-A2C_1_1	15	01b_VU101B-A2c_1	groundmass	AZ16M	Klaudia Kuiper	28.201	0.08	0.0030745	0.1	0.977051	0.17	1	1e-13
	01C_VU101B-A2C_1_1	20		0.0945179	1.19763	2.0033	4.913	0.030151	1.41065	0.0628058	16.7741	29.7066	0.196237	26.7988	14.4895	145.005	75.3754	5.5442	0.0564183	0.0131916	0.00470481		01C_VU101B-A2C_1_1	20	0.0143301	0.0001206	0.0085802	7.22e-05	0.0066492	8.88e-05	-0.0611978	0.01027	3.95223	0.0122873		01C_VU101B-A2C_1_1	20	01c_VU101B-A2c_1	groundmass	AZ16M	Klaudia Kuiper	28.201	0.08	0.0030745	0.1	0.977051	0.17	1	1e-13
	02_VU101B-A2C_1	23		0.0867316	1.04027	0.586061	20.5602	0.032645	1.06762	1.25204	0.230812	34.4298	0.102129	6.85541	0.437615	38.2012	2.41331	24.9218	1.14901	0.918348	0.377652		02_VU101B-A2C_1	23	0.0181067	0.0002662	0.010928	0.0001021	0.0104969	0.000126	0.0127695	0.0002764	3.72976	0.0236798		02_VU101B-A2C_1	23	02_VU101B-A2c	groundmass	AZ16M	Klaudia Kuiper	28.201	0.08	0.0030745	0.1	0.977051	0.17	1	1e-13
	03_VU101B-A2C_1	26.5		0.0952538	0.874159	1.00334	11.7007	0.0476266	0.799484	2.52581	0.192726	46.8137	0.0800725	7.30719	0.202597	40.691	1.11574	39.415	2.31808	1.08219	0.253284		03_VU101B-A2C_1	26.5	0.0181067	0.0002662	0.010928	0.0001021	0.0104969	0.000126	0.0127695	0.0002764	3.72976	0.0236798		03_VU101B-A2C_1	26.5	03_VU101B-A2c	groundmass	AZ16M	Klaudia Kuiper	28.201	0.08	0.0030745	0.1	0.977051	0.17	1	1e-13
	04_VU101B-A2C_1	30		0.0743746	0.872818	1.5306	7.06385	0.0633401	0.685373	4.31345	0.202269	54.3705	0.379015	7.48585	0.13513	41.6746	0.743784	59.3744	3.95882	1.21151	0.171229		04_VU101B-A2C_1	30	0.0181067	0.0002662	0.010928	0.0001021	0.0104969	0.000126	0.0127695	0.0002764	3.72976	0.0236798		04_VU101B-A2C_1	30	04_VU101B-A2c	groundmass	AZ16M	Klaudia Kuiper	28.201	0.08	0.0030745	0.1	0.977051	0.17	1	1e-13
	06_VU101B-A2C_1	35		0.0630874	1.02993	1.98963	7.12488	0.0921736	0.688846	6.8703	0.182017	73.6707	0.119964	8.00503	0.0688828	44.5301	0.378555	74.6379	6.30573	1.48452	0.21161		06_VU101B-A2C_1	35	0.0349484	0.0001859	0.0109449	0.0001233	0.0111802	0.000102	0.0124622	0.0001914	4.8554	0.0733349		06_VU101B-A2C_1	35	06_VU101B-A2c	groundmass	AZ16M	Klaudia Kuiper	28.201	0.08	0.0030745	0.1	0.977051	0.17	1	1e-13
	07_VU101B-A2C_1	40	4	0.0755167	1.12024	2.75109	4.13728	0.106375	0.466734	7.93338	0.175141	83.513	0.0988219	7.71311	0.0725197	42.9251	0.398892	73.2542	7.28117	1.23971	0.102673		07_VU101B-A2C_1	40	0.0349484	0.0001859	0.0109449	0.0001233	0.0111802	0.000102	0.0124622	0.0001914	4.8554	0.0733349		07_VU101B-A2C_1	40	07_VU101B-A2c	groundmass	AZ16M	Klaudia Kuiper	28.201	0.08	0.0030745	0.1	0.977051	0.17	1	1e-13
	08_VU101B-A2C_1	50	4	0.10228	0.997478	4.83366	2.70103	0.174834	0.549982	13.7413	0.180604	133.589	0.0731297	7.52813	0.0541448	41.9073	0.297987	77.4176	12.6116	1.22213	0.0661676		08_VU101B-A2C_1	50	0.0349484	0.0001859	0.0109449	0.0001233	0.0111802	0.000102	0.0124622	0.0001914	4.8554	0.0733349		08_VU101B-A2C_1	50	08_VU101B-A2c	groundmass	AZ16M	Klaudia Kuiper	28.201	0.08	0.0030745	0.1	0.977051	0.17	1	1e-13
	10_VU101B-A2C_1	65	4	0.0877422	1.01429	7.34884	1.7597	0.251121	0.461517	20.8191	0.176828	179.354	0.0589875	7.38533	0.038018	41.1212	0.209323	85.7071	19.1074	1.21789	0.0430784		10_VU101B-A2C_1	65	0.0349484	0.0001859	0.0109449	0.0001233	0.0111802	0.000102	0.0124622	0.0001914	4.8554	0.0733349		10_VU101B-A2C_1	65	10_VU101B-A2c	groundmass	AZ16M	Klaudia Kuiper	28.201	0.08	0.0030745	0.1	0.977051	0.17	1	1e-13
	13_VU101B-A2C_1	120	4	0.0440343	1.32223	5.2862	2.80779	0.187017	0.533908	16.261	0.178236	128.727	0.145235	7.13414	0.0404744	39.7377	0.223016	90.0999	14.9244	1.32245	0.0744127		13_VU101B-A2C_1	120	0.0188438	0.000259	0.0114257	0.0001669	0.0123659	0.0001151	0.014295	0.0003109	3.82553	0.007206		13_VU101B-A2C_1	120	13_VU101B-A2c	groundmass	AZ16M	Klaudia Kuiper	28.201	0.08	0.0030745	0.1	0.977051	0.17	1	1e-13
	14_VU101B-A2C_1	150	4	0.0516984	1.15037	12.0934	1.67386	0.398626	0.39649	35.056	0.172595	263.438	0.0554998	7.10248	0.0278451	39.5632	0.153443	94.4913	32.174	1.24618	0.04194		14_VU101B-A2C_1	150	0.0188438	0.000259	0.0114257	0.0001669	0.0123659	0.0001151	0.014295	0.0003109	3.82553	0.007206		14_VU101B-A2C_1	150	14_VU101B-A2c	groundmass	AZ16M	Klaudia Kuiper	28.201	0.08	0.0030745	0.1	0.977051	0.17	1	1e-13
			S	0.98994	0.297921	42.6077	1.03599	1.43588	0.18691	108.961	0.0782123	1088.76	0.0346738
	Information on Analysis and Constants Used in Calculations									Results		40(a)/36(a)	± 2s	40(r)/39(k)	± 2s	Age	± 2s	MSWD	39Ar(k)	K/Ca	± 2s
																(Ma)			(%,n)
	Sample = 01A_VU101B-A2C_1				Age Equations = Min et al. (2000)					Age Plateau Error Mean				7.25499	0.192737	40.4034	1.06461	116.022	86.0986	1.24148	0.0313365
	Material = groundmass				Negative Intensities = Allowed										0.0265661		0.0263494	3.9086e-99	5
	Location = AZ16M				Decay Constant 40K = 5.460 ± 0.053 E-10 1/a					Full External Error							1.35548	2.41421	2σ Confidence Limit
	Analyst = Klaudia Kuiper				Decay Constant 39Ar = 2.940 ± 0.016 E-07 1/h					Analytical Error							1.0616	10.7714	Error Magnification
	Project = VU101				Decay Constant 37Ar = 8.230 ± 0.012 E-04 1/h
	Mass Discrimination Law = LIN				Decay Constant 36Cl = 2.257 ± 0.015 E-06 1/a					Total Fusion Age				7.31162	0.0210599	40.7154	0.141197		12	1.09935	0.0228431
	Irradiation = VU101				Decay Activity 40K(EC,β⁺) = 3.310 ± 0.030 1/gs										0.00288033		0.0034679
	J = 0.00307450 ± 0.00000307				Decay Activity 40K(β⁻) = 27.890 ± 0.150 1/gs					Full External Error							0.857147
	FCs = 28.201 ± 0.023 Ma				Atmospheric Ratio 40/36(a) = 298.56 ± 0.31					Analytical Error							0.115979
	IGSN = Undefined				Atmospheric Ratio 38/36(a) = 0.1885 ± 0.0003
	Preferred Age = Undefined				Production Ratio 39/37(ca) = 0.000673 ± 0.000004					Normal Isochron Error Chron		376.856	22.3149	6.98868	0.0870061	38.936	0.485767	7.11555	86.0986
	Classification = Undefined				Production Ratio 36/37(ca) = 0.000264 ± 0.000002								0.0592133		0.0124496		0.012476	8.91902e-05	5
	Experiment Type = Undefined				Production Ratio 40/39(k) = 0.000860 ± 0.000070					Full External Error							0.943461	2.63299	2σ Confidence Limit
	Extraction Method = Undefined				Production Ratio 38/39(k) = 0.012110 ± 0.000030					Analytical Error							0.479617	2.6675	Error Magnification
	Heating = 45 sec				Production Ratio 36/38(cl) = 262.80 ± 1.71												1		Number of Iterations
	Isolation = 5.00 min				Scaling Ratio K/Ca = 0.430												6.91302e-06		Convergence
	Instrument = HELIX				Abundance Ratio 40K/K = 1.1700 ± 0.0100 E-04
	Lithology = Undefined				Atomic Weight K = 39.0983 ± 0.0001 g					Inverse Isochron Error Chron		377.058	22.5006	6.99045	0.0876434	38.9458	0.489237	7.18254	86.0986
	Lat-Lon = Undefined - Undefined												0.0596741		0.0125376		0.012562	8.10109e-05	5
	Feature = Undefined									Full External Error							0.945424	2.63299	2σ Confidence Limit
										Analytical Error							0.483128	2.68003	Error Magnification
																	2		Number of Iterations
																	0.000135636		Convergence
																	0.266153		Spreading Factor
[truncated: 39 more columns]

## Sheet: Hidden Data
Double Line Plot Age Plateau			Double Line Plot K/Ca Plateau			X-Y Plot Normal Isochron		X-Y Plot Inverse Isochron		Error Ellipses Normal Isochron		Error Ellipses Inverse Isochron
Ar39k%	Line 1	Line 2	Ar39k%	Line 1	Line 2	X-axis	Y-axis	X-axis	Y-axis	X-axis	Y-axis	X-axis	Y-axis
0	-219.263	-81.3117	0	0.0107405	0.0227324	0.774103	278.725	0.0027773	0.00358776			0.00372518	0.00358782
0.0566759	-219.263	-81.3117	0.0566759	0.0107405	0.0227324	0.460445	290.189	0.00158671	0.00344603			0.00369288	0.00357074
0.0566759	-29.1359	-181.563	0.0566759	0.0226155	0.0106693	0.653923	316.084	0.00206882	0.00316371			0.00359819	0.00355482
0.11336	-29.1359	-181.563	0.11336	0.0226155	0.0106693	14.4571	397.669	0.0363546	0.00251465			0.00344755	0.00354115
0.11336	69.6297	220.381	0.11336	0.00848684	0.0178965	26.5834	492.81	0.0539425	0.00202918			0.00325124	0.00353065
0.169778	69.6297	220.381	0.169778	0.00848684	0.0178965	58.2992	734.98	0.0793209	0.00136058			0.00302263	0.00352405
0.169778	40.6145	35.7879	0.169778	1.296	0.540695	109.794	1177.47	0.0932462	0.000849281			0.0027773	0.00352179
1.31879	40.6145	35.7879	1.31879	1.296	0.540695	106.05	1116.54	0.0949814	0.000895627			0.00253197	0.00352402
1.31879	39.5752	41.8067	1.31879	0.82891	1.33548	136.014	1322.49	0.102847	0.000756147			0.00230336	0.0035306
3.63687	39.5752	41.8067	3.63687	0.82891	1.33548	242.583	2090.11	0.116062	0.000478443			0.00210705	0.00354107
3.63687	42.4184	40.9308	3.63687	1.38274	1.04028	381.285	3018.7	0.126308	0.000331269			0.00195641	0.00355473
7.59569	42.4184	40.9308	7.59569	1.38274	1.04028	722.55	5430.46	0.133055	0.000184147			0.00186172	0.00357064
7.59569	44.1515	44.9086	7.59569	1.27291	1.69614							0.00182942	0.00358771
13.9014	44.1515	44.9086	13.9014	1.27291	1.69614							0.00186172	0.00360479
13.9014	43.3239	42.5262	13.9014	1.34239	1.13704							0.00195641	0.00362071
21.1826	43.3239	42.5262	21.1826	1.34239	1.13704							0.00210704	0.00363438
21.1826	41.6093	42.2053	21.1826	1.15596	1.2883							0.00230336	0.00364487
33.7941	41.6093	42.2053	33.7941	1.15596	1.2883							0.00253197	0.00365148
33.7941	41.3306	40.9119	33.7941	1.26097	1.17481							0.00277729	0.00365374
52.9016	41.3306	40.9119	52.9016	1.26097	1.17481							0.00302262	0.00365151
52.9016	39.5147	39.9607	52.9016	1.24803	1.39686							0.00325123	0.00364493
67.826	39.5147	39.9607	67.826	1.24803	1.39686							0.00344755	0.00363445
67.826	39.7167	39.4098	67.826	1.28812	1.20424							0.00359818	0.0036208
100	39.7167	39.4098	100	1.28812	1.20424							0.00369288	0.00360489
												0.00372518	0.00358782
												0.00212817	0.00344608
												0.00210972	0.00343082
												0.00205563	0.00341659
												0.00196958	0.00340438
												0.00185744	0.003395
												0.00172685	0.0033891
												0.00158671	0.00338708
												0.00144658	0.00338907
												0.00131599	0.00339495
												0.00120385	0.00340431
												0.0011178	0.00341651
												0.0010637	0.00343073
												0.00104525	0.00344599
												0.0010637	0.00346125
												0.00111779	0.00347547
												0.00120384	0.00348769
												0.00131598	0.00349707
												0.00144657	0.00350297
												0.0015867	0.00350499
												0.00172684	0.00350299
												0.00185743	0.00349711
												0.00196957	0.00348775
												0.00205562	0.00347555
												0.00210971	0.00346134
												0.00212817	0.00344608
												0.00277816	0.00316386
												0.002754	0.00314386
												0.00268314	0.00312522
												0.00257041	0.0031092
												0.00242351	0.0030969
												0.00225243	0.00308915
												0.00206884	0.00308648
												0.00188525	0.00308907
												0.00171417	0.00309675
												0.00156726	0.003109
												0.00145453	0.00312497
												0.00138366	0.00314358
												0.00135949	0.00316357
												0.00138365	0.00318356
												0.00145451	0.00320221
												0.00156723	0.00321822
												0.00171414	0.00323053
												0.00188522	0.00323828
												0.00206881	0.00324095
												0.0022524	0.00323835
												0.00242348	0.00323067
												0.00257039	0.00321843
												0.00268312	0.00320245
												0.00275399	0.00318384
												0.00277816	0.00316386
												0.0365383	0.00251691
												0.0365322	0.00250321
												0.036514	0.00249029
												0.0364849	0.00247902
												0.036447	0.00247019
												0.0364028	0.00246438
												0.0363553	0.002462
												0.0363077	0.00246321
												0.0362634	0.00246793
												0.0362253	0.00247582
												0.0361959	0.00248637
												0.0361774	0.00249884
												0.036171	0.00251239
												0.0361771	0.00252609
												0.0361953	0.00253901
												0.0362243	0.00255028
												0.0362623	0.00255911
												0.0363065	0.00256492
												0.036354	0.0025673
												0.0364015	0.00256609
												0.0364459	0.00256138
												0.036484	0.00255348
												0.0365133	0.00254293
												0.0365318	0.00253046
												0.0365383	0.00251691
												0.0541678	0.00203046
												0.0541602	0.00202117
												0.0541377	0.00201242
												0.0541019	0.00200482
												0.0540553	0.00199888
												0.054001	0.001995
												0.0539427	0.00199345
												0.0538844	0.00199434
												0.0538301	0.0019976
												0.0537834	0.00200301
												0.0537476	0.00201021
												0.053725	0.0020187
												0.0537173	0.0020279
												0.0537249	0.00203719
												0.0537474	0.00204593
												0.0537831	0.00205354
												0.0538297	0.00205948
												0.053884	0.00206336
												0.0539423	0.0020649
												0.0540006	0.00206402
												0.054055	0.00206076
												0.0541017	0.00205534
												0.0541375	0.00204815
												0.05416	0.00203966
												0.0541678	0.00203046
												0.0800025	0.00136969
												0.0799794	0.00136307
												0.0799113	0.00135628
												0.0798031	0.00134978
												0.079662	0.00134402
												0.0794976	0.00133938
												0.0793212	0.00133619
												0.0791448	0.00133467
												0.0789804	0.00133491
												0.0788391	0.00133689
												0.0787307	0.0013405
												0.0786626	0.00134547
												0.0786393	0.00135147
												0.0786624	0.00135809
												0.0787304	0.00136489
												0.0788387	0.00137138
												0.0789798	0.00137715
												0.0791442	0.00138178
												0.0793206	0.00138497
												0.079497	0.0013865
												0.0796614	0.00138626
												0.0798026	0.00138427
												0.079911	0.00138067
												0.0799792	0.00137569
												0.0800025	0.00136969
												0.0936528	0.000850405
												0.0936389	0.000845772
												0.0935983	0.000841378
												0.0935337	0.000837523
												0.0934495	0.00083447
												0.0933515	0.000832425
												0.0932462	0.000831529
												0.093141	0.000831844
												0.0930429	0.000833346
												0.0929587	0.000835934
												0.092894	0.000839433
												0.0928534	0.000843602
												0.0928395	0.000848158
												0.0928534	0.000852791
												0.092894	0.000857185
												0.0929586	0.00086104
												0.0930428	0.000864093
												0.0931409	0.000866138
												0.0932461	0.000867034
												0.0933514	0.000866719
												0.0934494	0.000865217
												0.0935337	0.000862629
												0.0935983	0.00085913
												0.0936389	0.000854961
												0.0936528	0.000850405
												0.0953635	0.0008965
												0.0953505	0.000891207
												0.0953123	0.000886216
												0.0952516	0.000881867
												0.0951725	0.000878455
												0.0950803	0.000876213
												0.0949814	0.000875295
												0.0948825	0.000875762
												0.0947904	0.000877582
												0.0947112	0.000880633
												0.0946505	0.000884705
												0.0946123	0.000889522
												0.0945993	0.000894755
												0.0946123	0.000900047
												0.0946505	0.000905038
												0.0947112	0.000909388
												0.0947903	0.0009128
												0.0948824	0.000915041
												0.0949813	0.00091596
												0.0950802	0.000915493
												0.0951724	0.000913672
												0.0952515	0.000910621
												0.0953123	0.000906549
												0.0953504	0.000901732
												0.0953635	0.0008965
												0.103248	0.000756562
												0.103234	0.000752583
												0.103194	0.000748847
												0.10313	0.000745609
												0.103047	0.000743088
												0.102951	0.000741457
												0.102847	0.000740828
												0.102743	0.000741242
												0.102646	0.000742672
												0.102563	0.000745021
												0.1025	0.000748127
												0.10246	0.00075178
												0.102446	0.000755731
												0.10246	0.00075971
												0.1025	0.000763446
												0.102563	0.000766685
												0.102646	0.000769205
												0.102743	0.000770836
												0.102847	0.000771466
												0.102951	0.000771051
												0.103047	0.000769621
												0.10313	0.000767273
												0.103194	0.000764166
												0.103234	0.000760513
												0.103248	0.000756562
												0.116495	0.000478621
												0.11648	0.000476041
												0.116437	0.000473624
												0.116368	0.000471535
												0.116278	0.000469917
												0.116174	0.00046888
												0.116062	0.000468495
												0.11595	0.000468788
												0.115846	0.000469738
												0.115756	0.000471282
												0.115687	0.000473314
												0.115644	0.000475695
												0.115629	0.000478264
												0.115644	0.000480845
												0.115687	0.000483262
												0.115756	0.00048535
												0.115846	0.000486968
												0.11595	0.000488005
												0.116062	0.00048839
												0.116174	0.000488098
												0.116278	0.000487147
												0.116368	0.000485603
												0.116437	0.000483571
												0.11648	0.00048119
												0.116495	0.000478621
												0.126889	0.000331877
												0.126869	0.000329501
												0.126811	0.000327246
												0.126718	0.000325265
												0.126598	0.000323693
												0.126458	0.000322637
												0.126308	0.00032217
												0.126157	0.000322322
												0.126017	0.000323085
												0.125897	0.000324405
												0.125805	0.000326193
												0.125747	0.000328326
												0.125727	0.000330661
												0.125747	0.000333036
												0.125805	0.000335292
												0.125897	0.000337273
												0.126017	0.000338845
												0.126157	0.0003399
												0.126308	0.000340368
												0.126458	0.000340215
												0.126598	0.000339453
												0.126718	0.000338133
												0.126811	0.000336345
												0.126869	0.000334211
												0.126889	0.000331877
												0.133538	0.000184209
												0.133521	0.000183032
												0.133473	0.00018193
												0.133396	0.00018098
												0.133296	0.000180246
												0.13318	0.000179777
												0.133055	0.000179606
												0.13293	0.000179744
												0.132814	0.000180183
												0.132714	0.000180892
												0.132637	0.000181822
												0.132589	0.000182911
												0.132573	0.000184084
												0.132589	0.000185261
												0.132637	0.000186363
												0.132714	0.000187313
												0.132814	0.000188048
												0.13293	0.000188516
												0.133055	0.000188687
												0.13318	0.000188549
												0.133296	0.00018811
												0.133396	0.000187401
												0.133473	0.000186471
												0.133521	0.000185382
												0.133538	0.000184209
