# Supplementary material for: Exploring a link between the Middle Eocene Climatic Optimum and Neotethys continental arc flare-up
Source: Copernicus journal article supplement (doi:10.5194/cp-17-229-2021), 2021-01-18
Supplement: Supplementary file 5 [file S14_VU101B-A3c.xls]

## Sheet: Summary Table
	Relative Abundances			36Ar [fA]	%1s	37Ar [fA]	%1s	38Ar [fA]	%1s	39Ar [fA]	%1s	40Ar [fA]	%1s	40(r)/39(k)	± 2s	Age	± 2s	40Ar(r)	39Ar(k)	K/Ca	± 2s		Procedure Blanks		36Ar [fA]	1s	37Ar [fA]	1s	38Ar [fA]	1s	39Ar [fA]	1s	40Ar [fA]	1s		Sample Parameters		Sample	Material	Location	Analyst	Standard	%1s	J	%1s	MDF	%1s	Volume Ratio	Sensitivity
																(Ma)		(%)	(%)																							(in Ma)							(mol/volt)
	36_VU101B-A3	20		0.00227193	14.2839	0.0148034	54.6766	0.000315629	57.768	-0.000629225	37.7122	0.291539	9.01353	603.269	547.188	1923.61	1079.78	-132.264	-0.0132724	-0.0185668	0.0245432		36_VU101B-A3	20	0.0182369	0.0002227	0.0064831	0.0001488	0.0077828	0.0001389	0.0053784	0.0002114	5.37042	0.0217505		36_VU101B-A3	20	36_VU101B-A3	plagioclase	AZ16A	Klaudia Kuiper	28.201	0.08	0.0030819	0.1	0.971118	0.2	1	1e-13
	38_VU101B-A3	80	4	0.0423309	1.63584	18.0147	1.01555	0.0487902	0.96531	3.42038	0.500464	36.5701	0.499482	7.43749	0.178706	41.5069	0.986097	69.3157	70.7706	0.0813532	0.0018434		38_VU101B-A3	80	0.0199891	0.0002334	0.006831	0.0001203	0.0077434	0.0001111	0.004644	0.0001389	5.59454	0.0341447		38_VU101B-A3	80	38_VU101B-A3	plagioclase	AZ16A	Klaudia Kuiper	28.201	0.08	0.0030819	0.1	0.971118	0.2	1	1e-13
	39_VU101B-A3	20		-1.24347e-05	3066.97	-0.000350794	1553.5	0.000346194	43.9693	0.000288476	64.9765	0.0463035	79.5859	173.247	859.03	783.486	3160.34	108.023	0.00599496	-0.353902	11.0053		39_VU101B-A3	20	0.0199891	0.0002334	0.006831	0.0001203	0.0077434	0.0001111	0.004644	0.0001389	5.59454	0.0341447		39_VU101B-A3	20	39_VU101B-A3	plagioclase	AZ16A	Klaudia Kuiper	28.201	0.08	0.0030819	0.1	0.971118	0.2	1	1e-13
	40_VU101B-A3	80	4	0.00169101	21.1144	6.26436	0.867008	0.0175999	1.35222	1.41223	0.221207	10.7692	0.369711	7.6398	0.165326	42.623	0.911707	99.886	29.2367	0.0966492	0.00172993		40_VU101B-A3	80	0.0199891	0.0002334	0.006831	0.0001203	0.0077434	0.0001111	0.004644	0.0001389	5.59454	0.0341447		40_VU101B-A3	80	40_VU101B-A3	plagioclase	AZ16A	Klaudia Kuiper	28.201	0.08	0.0030819	0.1	0.971118	0.2	1	1e-13
			S	0.0462814	2.00112	24.2935	0.786585	0.0670519	0.863037	4.83227	0.360144	47.6772	0.403444
	Information on Analysis and Constants Used in Calculations									Results		40(a)/36(a)	± 2s	40(r)/39(k)	± 2s	Age	± 2s	MSWD	39Ar(k)	K/Ca	± 2s
																(Ma)			(%,n)
	Sample = 36_VU101B-A3				Age Equations = Min et al. (2000)					Age Plateau				7.5465	0.201706	42.1084	1.11576	2.7625	100.007	0.0894864	0.0152652
	Material = plagioclase				Negative Intensities = Allowed										0.0267285		0.0264972	0.0964973	2
	Location = AZ16A				Decay Constant 40K = 5.460 ± 0.053 E-10 1/a					Full External Error							1.41738	3.82843	2σ Confidence Limit
	Analyst = Klaudia Kuiper				Decay Constant 39Ar = 2.940 ± 0.016 E-07 1/h					Analytical Error							1.11264	1.66208	Error Magnification
	Project = VU101				Decay Constant 37Ar = 8.230 ± 0.012 E-04 1/h
	Mass Discrimination Law = LIN				Decay Constant 36Cl = 2.257 ± 0.015 E-06 1/a					Total Fusion Age				7.4275	0.150093	41.4518	0.832279		4	0.0852428	0.00147577
	Irradiation = VU101				Decay Activity 40K(EC,β⁺) = 3.310 ± 0.030 1/gs										0.0202077		0.0200782
	J = 0.00308190 ± 0.00000308				Decay Activity 40K(β⁻) = 27.890 ± 0.150 1/gs					Full External Error							1.19721
	FCs = 28.201 ± 0.023 Ma				Atmospheric Ratio 40/36(a) = 298.56 ± 0.31					Analytical Error							0.828232
	IGSN = Undefined				Atmospheric Ratio 38/36(a) = 0.1885 ± 0.0003
	Preferred Age = Undefined				Production Ratio 39/37(ca) = 0.000673 ± 0.000004					Normal Isochron Cannot Calculate
	Classification = Undefined				Production Ratio 36/37(ca) = 0.000264 ± 0.000002
	Experiment Type = Undefined				Production Ratio 40/39(k) = 0.000860 ± 0.000070
	Extraction Method = Undefined				Production Ratio 38/39(k) = 0.012110 ± 0.000030
	Heating = 45 sec				Production Ratio 36/38(cl) = 262.80 ± 1.71
	Isolation = 5.00 min				Scaling Ratio K/Ca = 0.430
	Instrument = HELIX				Abundance Ratio 40K/K = 1.1700 ± 0.0100 E-04
	Lithology = Undefined				Atomic Weight K = 39.0983 ± 0.0001 g					Inverse Isochron Cannot Calculate
	Lat-Lon = Undefined - Undefined
	Feature = Undefined
[truncated: 39 more columns]

## Sheet: Hidden Data
Double Line Plot Age Plateau			Double Line Plot K/Ca Plateau			X-Y Plot Normal Isochron		X-Y Plot Inverse Isochron		Error Ellipses Normal Isochron		Error Ellipses Inverse Isochron
Ar39k%	Line 1	Line 2	Ar39k%	Line 1	Line 2	X-axis	Y-axis	X-axis	Y-axis	X-axis	Y-axis	X-axis	Y-axis
0	843.833	3003.4	0	-0.0431099	0.00597643	-0.281826	128.543	-0.00219245	0.00777947			-0.00184548	0.0104017
-0.0132724	843.833	3003.4	-0.0132724	-0.0431099	0.00597643	90.7056	973.182	0.0932052	0.00102756			-0.00143303	0.0102562
-0.0132724	42.493	40.5208	-0.0132724	0.0831966	0.0795098	-23.2008	-3720.91	0.00623525	-0.000268751			-0.00107234	0.00994194
70.7574	42.493	40.5208	70.7574	0.0831966	0.0795098	37998.7	290601	0.130759	3.44114e-06			-0.000787975	0.0094803
70.7574	-2376.85	3943.82	70.7574	-11.3592	10.6514							-0.000599326	0.00890275
70.7633	-2376.85	3943.82	70.7633	-11.3592	10.6514							-0.000519246	0.00824864
70.7633	43.5347	41.7113	70.7633	0.0983791	0.0949193							-0.000553193	0.00756257
100	43.5347	41.7113	100	0.0983791	0.0949193							-0.000698852	0.00689127
												-0.000946298	0.00628051
												-0.00127867	0.00577189
												-0.00167331	0.00540009
												-0.00210333	0.00519044
												-0.00253942	0.00515723
												-0.00295187	0.00530272
												-0.00331257	0.005617
												-0.00359693	0.00607864
												-0.00378558	0.00665619
												-0.00386566	0.0073103
												-0.00383172	0.00799637
												-0.00368606	0.00866767
												-0.00343861	0.00927843
												-0.00310624	0.00978705
												-0.0027116	0.0101588
												-0.00228158	0.0103685
												-0.00184548	0.0104017
												0.0945257	0.0010348
												0.0944808	0.00102454
												0.0943489	0.00101449
												0.0941391	0.00100532
												0.0938656	0.000997672
												0.0935472	0.000992059
												0.0932054	0.000988866
												0.0928637	0.000988309
												0.0925452	0.000990427
												0.0922717	0.000995075
												0.0920618	0.00100194
												0.0919298	0.00101054
												0.0918847	0.00102031
												0.0919297	0.00103057
												0.0920616	0.00104063
												0.0922714	0.00104979
												0.0925448	0.00105744
												0.0928633	0.00106306
												0.093205	0.00106625
												0.0935468	0.00106681
												0.0938653	0.00106469
												0.0941388	0.00106004
												0.0943487	0.00105318
												0.0944806	0.00104457
												0.0945257	0.0010348
												0.00688498	0.0162019
												0.0101739	0.01551
												0.0131943	0.0137429
												0.0157405	0.0110209
												0.017639	0.00752952
												0.0187603	0.00350671
												0.019028	-0.000773393
												0.0184239	-0.0050191
												0.0169892	-0.00894109
												0.0148217	-0.0122721
												0.012069	-0.014785
												0.00891868	-0.0163087
												0.00558553	-0.0167394
												0.00229666	-0.0160475
												-0.0007238	-0.0142804
												-0.00327001	-0.0115584
												-0.00516846	-0.00806703
												-0.00628976	-0.00404422
												-0.0065575	0.000235883
												-0.00595344	0.00448159
												-0.00451874	0.00840358
												-0.00235117	0.0117346
												0.000401549	0.0142475
												0.00355182	0.0157712
												0.00688497	0.0162019
												0.131887	3.46304e-06
												0.131848	-1.37229e-05
												0.131736	-2.97392e-05
												0.131556	-4.34943e-05
												0.131323	-5.40508e-05
												0.131051	-6.06893e-05
												0.130759	-6.29575e-05
												0.130467	-6.07007e-05
												0.130195	-5.40727e-05
												0.129962	-4.35253e-05
												0.129782	-2.97772e-05
												0.12967	-1.37653e-05
												0.129631	3.41922e-06
												0.12967	2.06052e-05
												0.129782	3.66215e-05
												0.129962	5.03766e-05
												0.130195	6.09331e-05
												0.130467	6.75716e-05
												0.130759	6.98398e-05
												0.131051	6.7583e-05
												0.131323	6.0955e-05
												0.131556	5.04076e-05
												0.131736	3.66595e-05
												0.131848	2.06476e-05
												0.131887	3.4631e-06
