# Supplementary material for: Exploring a link between the Middle Eocene Climatic Optimum and Neotethys continental arc flare-up
Source: Copernicus journal article supplement (doi:10.5194/cp-17-229-2021), 2021-01-18
Supplement: Supplementary file 6 [file S15_VU101B-A3da.xls]

## Sheet: Summary Table
	Relative Abundances			36Ar [fA]	%1s	37Ar [fA]	%1s	38Ar [fA]	%1s	39Ar [fA]	%1s	40Ar [fA]	%1s	40(r)/39(k)	± 1s	Age	± 1s	40Ar(r)	39Ar(k)	K/Ca	± 1s		Procedure Blanks		36Ar [fA]	1s	37Ar [fA]	1s	38Ar [fA]	1s	39Ar [fA]	1s	40Ar [fA]	1s		Sample Parameters		Sample	Material	Location	Analyst	Standard	%1s	J	%1s	MDF	%1s	Volume Ratio	Sensitivity
																(Ma)		(%)	(%)																							(in Ma)							(mol/volt)
	058_VU101B-A3A	10		0.00141813	25.5358	1.12195	4.36258	0.00182415	11.2643	0.127205	5.91581	1.33479	0.618027	7.90615	0.978604	44.0912	5.39229	74.8977	0.0658313	0.0484633	0.00357608		058_VU101B-A3A	10	0.0199813	0.0001779	0.0077513	0.0001073	0.0073563	0.0001172	-0.759133	0.0034104	4.99303	0.0045678		058_VU101B-A3A	10	058_VU101B-A3a	plagioclase	AZ16A	Klaudia Kuiper	28.201	0.08	0.0030819	0.1	0.974435	0.17	1	1e-13
	059_VU101B-A3A	15		0.0186884	2.10003	26.2451	1.05692	0.039878	0.807599	3.32542	0.252151	26.8942	0.0582758	7.06835	0.0407368	39.4689	0.225035	86.9346	1.72206	0.0541944	0.000589048		059_VU101B-A3A	15	0.0199813	0.0001779	0.0077513	0.0001073	0.0073563	0.0001172	-0.759133	0.0034104	4.99303	0.0045678		059_VU101B-A3A	15	059_VU101B-A3a	plagioclase	AZ16A	Klaudia Kuiper	28.201	0.08	0.0030819	0.1	0.974435	0.17	1	1e-13
	060_VU101B-A3A	20	4	0.0381073	1.40772	74.9461	0.966558	0.116726	0.540464	9.93182	0.194121	74.847	0.0362973	7.02011	0.0225033	39.2024	0.124329	92.6803	5.14438	0.0566941	0.000559044		060_VU101B-A3A	20	0.0199813	0.0001779	0.0077513	0.0001073	0.0073563	0.0001172	-0.759133	0.0034104	4.99303	0.0045678		060_VU101B-A3A	20	060_VU101B-A3a	plagioclase	AZ16A	Klaudia Kuiper	28.201	0.08	0.0030819	0.1	0.974435	0.17	1	1e-13
	062_VU101B-A3A	25	4	0.0617764	1.07565	110.651	0.944556	0.192229	0.547942	16.3347	0.179204	123.267	0.0384604	6.98211	0.018797	38.9925	0.103864	92.1013	8.46529	0.0631888	0.000607605		062_VU101B-A3A	25	0.0202247	0.000236	0.0082662	6.65e-05	0.0071203	0.0001152	-0.776559	0.0045174	4.77273	0.0039008		062_VU101B-A3A	25	062_VU101B-A3a	plagioclase	AZ16A	Klaudia Kuiper	28.201	0.08	0.0030819	0.1	0.974435	0.17	1	1e-13
	063_VU101B-A3A	30	4	0.0433799	1.21183	121.153	0.948895	0.232928	0.466661	20.2626	0.179983	145.295	0.0313015	7.0301	0.0160131	39.2576	0.0884685	97.6464	10.5066	0.0716273	0.00069189		063_VU101B-A3A	30	0.0202247	0.000236	0.0082662	6.65e-05	0.0071203	0.0001152	-0.776559	0.0045174	4.77273	0.0039008		063_VU101B-A3A	30	063_VU101B-A3a	plagioclase	AZ16A	Klaudia Kuiper	28.201	0.08	0.0030819	0.1	0.974435	0.17	1	1e-13
	064_VU101B-A3A	40	4	0.0644712	1.25658	167.322	0.944646	0.377803	0.427459	32.9846	0.175253	236.129	0.0311065	6.99806	0.0152199	39.0806	0.0840944	97.4215	17.1136	0.0844773	0.000811727		064_VU101B-A3A	40	0.0202247	0.000236	0.0082662	6.65e-05	0.0071203	0.0001152	-0.776559	0.0045174	4.77273	0.0039008		064_VU101B-A3A	40	064_VU101B-A3a	plagioclase	AZ16A	Klaudia Kuiper	28.201	0.08	0.0030819	0.1	0.974435	0.17	1	1e-13
	066_VU101B-A3A	50	4	0.0479519	1.13471	134.26	0.943917	0.312694	0.494353	27.3702	0.175959	193.864	0.0375935	6.96875	0.0146157	38.9186	0.0807629	98.0617	14.2023	0.0873701	0.000839007		066_VU101B-A3A	50	0.0191663	0.0002051	0.0080493	6.26e-05	0.0072996	8.21e-05	-0.698407	0.0031961	5.0212	0.0045779		066_VU101B-A3A	50	066_VU101B-A3a	plagioclase	AZ16A	Klaudia Kuiper	28.201	0.08	0.0030819	0.1	0.974435	0.17	1	1e-13
	067_VU101B-A3A	65	4	0.0451796	1.23767	117.252	0.949164	0.27236	0.527816	23.8736	0.178739	170.349	0.0378786	6.97976	0.0152685	38.9795	0.0843674	97.4949	12.3879	0.0872626	0.000842925		067_VU101B-A3A	65	0.0191663	0.0002051	0.0080493	6.26e-05	0.0072996	8.21e-05	-0.698407	0.0031961	5.0212	0.0045779		067_VU101B-A3A	65	067_VU101B-A3a	plagioclase	AZ16A	Klaudia Kuiper	28.201	0.08	0.0030819	0.1	0.974435	0.17	1	1e-13
	068_VU101B-A3A	80	4	0.0441909	1.28729	96.5844	0.981051	0.220527	0.474642	19.1816	0.181692	138.958	0.0367298	6.97618	0.0164239	38.9597	0.0907527	95.9719	9.95236	0.0851084	0.000849257		068_VU101B-A3A	80	0.0191663	0.0002051	0.0080493	6.26e-05	0.0072996	8.21e-05	-0.698407	0.0031961	5.0212	0.0045779		068_VU101B-A3A	80	068_VU101B-A3a	plagioclase	AZ16A	Klaudia Kuiper	28.201	0.08	0.0030819	0.1	0.974435	0.17	1	1e-13
	070_VU101B-A3A	100	4	0.00273458	11.7901	7.43144	1.13608	0.018045	1.86204	1.57043	0.440057	11.2242	0.095033	7.02185	0.0693709	39.212	0.383267	97.9327	0.814983	0.0905792	0.00110402		070_VU101B-A3A	100	0.0175361	9.37e-05	0.0077345	9.93e-05	0.0059281	9.63e-05	-0.773378	0.0027697	4.61676	0.0038765		070_VU101B-A3A	100	070_VU101B-A3a	plagioclase	AZ16A	Klaudia Kuiper	28.201	0.08	0.0030819	0.1	0.974435	0.17	1	1e-13
	071_VU101B-A3A	130	4	0.0281443	1.34399	89.5375	0.966689	0.217447	0.432521	19.1198	0.179395	134.194	0.0342597	6.96935	0.0147218	38.9219	0.0813494	98.9852	9.92264	0.0915325	0.000900042		071_VU101B-A3A	130	0.0175361	9.37e-05	0.0077345	9.93e-05	0.0059281	9.63e-05	-0.773378	0.0027697	4.61676	0.0038765		071_VU101B-A3A	130	071_VU101B-A3a	plagioclase	AZ16A	Klaudia Kuiper	28.201	0.08	0.0030819	0.1	0.974435	0.17	1	1e-13
	072_VU101B-A3A	170		0.0291631	1.92942	88.914	0.958719	0.213541	0.476015	18.6959	0.178436	131.111	0.035626	6.94331	0.0161521	38.7781	0.0892598	98.6921	9.70218	0.0901264	0.000878998		072_VU101B-A3A	170	0.0175361	9.37e-05	0.0077345	9.93e-05	0.0059281	9.63e-05	-0.773378	0.0027697	4.61676	0.0038765		072_VU101B-A3A	170	072_VU101B-A3a	plagioclase	AZ16A	Klaudia Kuiper	28.201	0.08	0.0030819	0.1	0.974435	0.17	1	1e-13
			S	0.425206	0.436394	1035.42	0.316535	2.216	0.162864	192.778	0.0607584	1387.47	0.0118981
	Information on Analysis and Constants Used in Calculations									Results		40(a)/36(a)	± 1s	40(r)/39(k)	± 1s	Age	± 1s	MSWD	39Ar(k)	K/Ca	± 1s
																(Ma)			(%,n)
	Sample = 058_VU101B-A3A				Age Equations = Min et al. (2000)					Age Plateau Error Mean				6.9882	0.00753675	39.0261	0.0567907	1.73371	88.5099	0.0749246	0.00463887
	Material = plagioclase				Negative Intensities = Allowed										0.0010785		0.0014552	0.0852271	9
	Location = AZ16A				Decay Constant 40K = 5.460 ± 0.053 E-10 1/a					Full External Error							0.409284	1.5	1σ Confidence Limit
	Analyst = Klaudia Kuiper				Decay Constant 39Ar = 2.940 ± 0.016 E-07 1/h					Analytical Error							0.041644	1.3167	Error Magnification
	Project = VU101				Decay Constant 37Ar = 8.230 ± 0.012 E-04 1/h
	Mass Discrimination Law = LIN				Decay Constant 36Cl = 2.257 ± 0.015 E-06 1/a					Total Fusion Age				6.98645	0.00546336	39.0164	0.0490054		12	0.0797695	0.000257144
	Irradiation = VU101				Decay Activity 40K(EC,β⁺) = 3.310 ± 0.030 1/gs										0.000781994		0.00125602
	J = 0.00308190 ± 0.00000308				Decay Activity 40K(β⁻) = 27.890 ± 0.150 1/gs					Full External Error							0.408178
	FCs = 28.201 ± 0.023 Ma				Atmospheric Ratio 40/36(a) = 298.56 ± 0.31					Analytical Error							0.0301877
	IGSN = Undefined				Atmospheric Ratio 38/36(a) = 0.1885 ± 0.0003
	Preferred Age = Undefined				Production Ratio 39/37(ca) = 0.000673 ± 0.000004					Normal Isochron Error Chron		317.786	14.3842	6.96776	0.0136849	38.9132	0.0848576	1.7675	88.5099
	Classification = Undefined				Production Ratio 36/37(ca) = 0.000264 ± 0.000002								0.0452637		0.00196403		0.00218069	0.0889555	9
	Experiment Type = Undefined				Production Ratio 40/39(k) = 0.000860 ± 0.000070					Full External Error							0.412974	1.53452	1σ Confidence Limit
	Extraction Method = Undefined				Production Ratio 38/39(k) = 0.012110 ± 0.000030					Analytical Error							0.0756199	1.32947	Error Magnification
	Heating = 45 sec				Production Ratio 36/38(cl) = 262.80 ± 1.71												1		Number of Iterations
	Isolation = 5.00 min				Scaling Ratio K/Ca = 0.430												9.0063e-06		Convergence
	Instrument = HELIX				Abundance Ratio 40K/K = 1.1700 ± 0.0100 E-04
	Lithology = Undefined				Atomic Weight K = 39.0983 ± 0.0001 g					Inverse Isochron Error Chron		308.934	14.5846	6.98021	0.0137851	38.9819	0.0853793	1.8527	88.5099
	Lat-Lon = Undefined - Undefined												0.0472096		0.00197489		0.00219023	0.0728701	9
	Feature = Undefined									Full External Error							0.413775	1.53452	1σ Confidence Limit
										Analytical Error							0.0761709	1.36114	Error Magnification
																	3		Number of Iterations
																	7.51373e-05		Convergence
																	0.0706492		Spreading Factor
[truncated: 39 more columns]

## Sheet: Hidden Data
Double Line Plot Age Plateau			Double Line Plot K/Ca Plateau			X-Y Plot Normal Isochron		X-Y Plot Inverse Isochron		Error Ellipses Normal Isochron		Error Ellipses Inverse Isochron
Ar39k%	Line 1	Line 2	Ar39k%	Line 1	Line 2	X-axis	Y-axis	X-axis	Y-axis	X-axis	Y-axis	X-axis	Y-axis
0	38.6989	49.4835	0	0.0448872	0.0520394	112.71	1189.66	0.0947412	0.000840575			0.10041	0.000841113
0.0658313	38.6989	49.4835	0.0658313	0.0448872	0.0520394	281.279	2286.74	0.123004	0.000437305			0.100217	0.000770813
0.0658313	39.6939	39.2439	0.0658313	0.0547835	0.0536054	539.331	4084.72	0.132036	0.000244815			0.0996503	0.000705267
1.78789	39.6939	39.2439	1.78789	0.0547835	0.0536054	499.322	3784.88	0.131925	0.000264209			0.0987495	0.000648941
1.78789	39.0781	39.3267	1.78789	0.056135	0.0572531	1770.98	12748.7	0.138914	7.84394e-05			0.0975755	0.000605676
6.93228	39.0781	39.3267	6.93228	0.056135	0.0572531	1619.46	11631.6	0.139229	8.59725e-05			0.0962084	0.000578418
6.93228	39.0963	38.8886	6.93228	0.0637964	0.0625812	2181.12	15498.3	0.140733	6.45233e-05			0.0947412	0.000569026
15.3976	39.0963	38.8886	15.3976	0.0637964	0.0625812	1672.74	11973.9	0.139699	8.35151e-05			0.0932741	0.00057814
15.3976	39.1691	39.3461	15.3976	0.0709354	0.0723192	1022.68	7432.96	0.137587	0.000134536			0.0919069	0.000605138
25.9041	39.1691	39.3461	25.9041	0.0709354	0.0723192	2025.98	14524.7	0.139485	6.88483e-05			0.0907329	0.000648181
25.9041	39.1647	38.9965	25.9041	0.0852891	0.0836656	4229.4	29774.7	0.142047	3.35856e-05			0.0898321	0.000704335
43.0177	39.1647	38.9965	43.0177	0.0852891	0.0836656	3275.36	23040.4	0.142157	4.3402e-05			0.0892658	0.000769773
43.0177	38.8379	38.9994	43.0177	0.0865311	0.0882091							0.0890726	0.000840037
57.22	38.8379	38.9994	57.22	0.0865311	0.0882091							0.0892658	0.000910337
57.22	39.0638	38.8951	57.22	0.0881055	0.0864197							0.0898321	0.000975883
69.6078	39.0638	38.8951	69.6078	0.0881055	0.0864197							0.0907329	0.00103221
69.6078	38.8689	39.0504	69.6078	0.0842591	0.0859576							0.0919069	0.00107547
79.5602	38.8689	39.0504	79.5602	0.0842591	0.0859576							0.093274	0.00110273
79.5602	39.5953	38.8288	79.5602	0.0916832	0.0894752							0.0947412	0.00111212
80.3752	39.5953	38.8288	80.3752	0.0916832	0.0894752							0.0962083	0.00110301
80.3752	38.8406	39.0033	80.3752	0.0906324	0.0924325							0.0975755	0.00107601
90.2978	38.8406	39.0033	90.2978	0.0906324	0.0924325							0.0987495	0.00103297
90.2978	38.8673	38.6888	90.2978	0.0910054	0.0892474							0.0996503	0.000976816
100	38.8673	38.6888	100	0.0910054	0.0892474							0.100217	0.000911377
												0.10041	0.000841113
												0.123324	0.000437362
												0.123314	0.000433493
												0.123282	0.000429884
												0.123231	0.000426781
												0.123164	0.000424395
												0.123087	0.000422889
												0.123004	0.000422365
												0.122922	0.000422859
												0.122844	0.000424338
												0.122778	0.0004267
												0.122727	0.000429785
												0.122695	0.000433383
												0.122684	0.000437247
												0.122695	0.000441116
												0.122727	0.000444725
												0.122778	0.000447828
												0.122844	0.000450214
												0.122922	0.00045172
												0.123004	0.000452244
												0.123087	0.00045175
												0.123164	0.000450271
												0.123231	0.000447909
												0.123282	0.000444824
												0.123314	0.000441227
												0.123324	0.000437362
												0.132298	0.000244831
												0.132289	0.000242813
												0.132263	0.000240931
												0.132222	0.000239314
												0.132167	0.000238071
												0.132104	0.000237288
												0.132036	0.000237019
												0.131968	0.00023728
												0.131905	0.000238055
												0.131851	0.000239291
												0.131809	0.000240903
												0.131783	0.000242781
												0.131774	0.000244799
												0.131783	0.000246817
												0.131809	0.000248699
												0.131851	0.000250316
												0.131905	0.000251558
												0.131968	0.000252341
												0.132036	0.000252611
												0.132104	0.00025235
												0.132167	0.000251575
												0.132222	0.000250339
												0.132263	0.000248727
												0.132289	0.000246848
												0.132298	0.000244831
												0.132168	0.00026423
												0.13216	0.000262668
												0.132136	0.000261211
												0.132097	0.000259959
												0.132047	0.000258996
												0.131988	0.000258388
												0.131925	0.000258177
												0.131863	0.000258377
												0.131804	0.000258974
												0.131754	0.000259929
												0.131715	0.000261175
												0.131691	0.000262627
												0.131682	0.000264188
												0.131691	0.00026575
												0.131715	0.000267207
												0.131754	0.00026846
												0.131804	0.000269423
												0.131863	0.00027003
												0.131925	0.000270241
												0.131988	0.000270041
												0.132047	0.000269444
												0.132097	0.00026849
												0.132136	0.000267244
												0.13216	0.000265791
												0.132168	0.00026423
												0.139169	7.84436e-05
												0.13916	7.73022e-05
												0.139135	7.62382e-05
												0.139094	7.53243e-05
												0.139042	7.46227e-05
												0.13898	7.41812e-05
												0.138914	7.40298e-05
												0.138848	7.4179e-05
												0.138787	7.46185e-05
												0.138734	7.53184e-05
												0.138694	7.6231e-05
												0.138668	7.72941e-05
												0.138659	7.84352e-05
												0.138668	7.95766e-05
												0.138694	8.06405e-05
												0.138734	8.15544e-05
												0.138787	8.22561e-05
												0.138848	8.26976e-05
												0.138914	8.28489e-05
												0.13898	8.26998e-05
												0.139042	8.22603e-05
												0.139094	8.15604e-05
												0.139135	8.06478e-05
												0.13916	7.95847e-05
												0.139169	7.84436e-05
												0.139478	8.59771e-05
												0.139469	8.4931e-05
												0.139444	8.39559e-05
												0.139405	8.31181e-05
												0.139353	8.24749e-05
												0.139293	8.20701e-05
												0.139229	8.19312e-05
												0.139164	8.20677e-05
												0.139104	8.24703e-05
												0.139053	8.31116e-05
												0.139013	8.39478e-05
												0.138989	8.4922e-05
												0.13898	8.59678e-05
												0.138989	8.70139e-05
												0.139013	8.79891e-05
												0.139053	8.88268e-05
												0.139104	8.947e-05
												0.139164	8.98749e-05
												0.139229	9.00138e-05
												0.139293	8.98773e-05
												0.139353	8.94747e-05
												0.139405	8.88334e-05
												0.139444	8.79972e-05
												0.139469	8.70229e-05
												0.139478	8.59771e-05
												0.140987	6.45284e-05
												0.140979	6.36231e-05
												0.140953	6.27792e-05
												0.140913	6.20542e-05
												0.14086	6.14974e-05
												0.140799	6.11468e-05
												0.140733	6.10264e-05
												0.140668	6.11442e-05
												0.140606	6.14924e-05
												0.140554	6.2047e-05
												0.140513	6.27705e-05
												0.140488	6.36134e-05
												0.140479	6.45183e-05
												0.140488	6.54235e-05
												0.140513	6.62674e-05
												0.140554	6.69924e-05
												0.140606	6.75492e-05
												0.140668	6.78998e-05
												0.140733	6.80202e-05
												0.140799	6.79024e-05
												0.14086	6.75543e-05
												0.140913	6.69996e-05
												0.140953	6.62762e-05
												0.140979	6.54333e-05
												0.140987	6.45284e-05
												0.139955	8.35216e-05
												0.139946	8.25154e-05
												0.139921	8.15774e-05
												0.13988	8.07713e-05
												0.139827	8.01523e-05
												0.139765	7.97624e-05
												0.139699	7.96283e-05
												0.139633	7.97591e-05
												0.139571	8.01458e-05
												0.139518	8.07621e-05
												0.139477	8.1566e-05
												0.139452	8.25028e-05
												0.139443	8.35085e-05
												0.139452	8.45147e-05
												0.139477	8.54528e-05
												0.139518	8.62588e-05
												0.139571	8.68778e-05
												0.139633	8.72677e-05
												0.139699	8.74018e-05
												0.139765	8.72711e-05
												0.139827	8.68844e-05
												0.13988	8.62681e-05
												0.139921	8.54641e-05
												0.139946	8.45274e-05
												0.139955	8.35216e-05
												0.137843	0.000134546
												0.137834	0.000133348
												0.137809	0.000132232
												0.137768	0.000131273
												0.137715	0.000130536
												0.137653	0.000130072
												0.137587	0.000129911
												0.137521	0.000130066
												0.137459	0.000130526
												0.137406	0.000131259
												0.137366	0.000132215
												0.13734	0.00013333
												0.137331	0.000134526
												0.13734	0.000135723
												0.137366	0.00013684
												0.137406	0.000137799
												0.137459	0.000138536
												0.137521	0.000139
												0.137587	0.000139161
												0.137653	0.000139005
												0.137715	0.000138546
												0.137768	0.000137813
												0.137809	0.000136857
												0.137834	0.000135742
												0.137843	0.000134546
												0.140115	6.88621e-05
												0.140094	6.14029e-05
												0.140031	5.44512e-05
												0.139931	4.84805e-05
												0.1398	4.38979e-05
												0.139648	4.10156e-05
												0.139485	4.00301e-05
												0.139322	4.10085e-05
												0.13917	4.38841e-05
												0.13904	4.8461e-05
												0.13894	5.44272e-05
												0.138877	6.13763e-05
												0.138855	6.88345e-05
												0.138877	7.62937e-05
												0.13894	8.32454e-05
												0.13904	8.92161e-05
												0.13917	9.37987e-05
												0.139322	9.6681e-05
												0.139485	9.76665e-05
												0.139648	9.66881e-05
												0.1398	9.38125e-05
												0.139931	8.92356e-05
												0.140031	8.32694e-05
												0.140094	7.63204e-05
												0.140115	6.88621e-05
												0.142307	3.35877e-05
												0.142298	3.26866e-05
												0.142272	3.18468e-05
												0.142231	3.11255e-05
												0.142177	3.05718e-05
												0.142114	3.02235e-05
												0.142047	3.01044e-05
												0.141979	3.02224e-05
												0.141917	3.05697e-05
												0.141863	3.11225e-05
												0.141821	3.18431e-05
												0.141795	3.26825e-05
												0.141786	3.35834e-05
												0.141795	3.44845e-05
												0.141821	3.53243e-05
												0.141863	3.60456e-05
												0.141917	3.65993e-05
												0.141979	3.69476e-05
												0.142047	3.70667e-05
												0.142114	3.69487e-05
												0.142177	3.66014e-05
												0.142231	3.60487e-05
												0.142272	3.5328e-05
												0.142298	3.44886e-05
												0.142307	3.35877e-05
												0.142417	4.34051e-05
												0.142408	4.21723e-05
												0.142382	4.10233e-05
												0.142341	4.00365e-05
												0.142287	3.9279e-05
												0.142224	3.88025e-05
												0.142157	3.86394e-05
												0.14209	3.88009e-05
												0.142027	3.9276e-05
												0.141974	4.00322e-05
												0.141932	4.10181e-05
												0.141907	4.21665e-05
												0.141898	4.3399e-05
												0.141907	4.46318e-05
												0.141932	4.57808e-05
												0.141974	4.67676e-05
												0.142027	4.75251e-05
												0.14209	4.80016e-05
												0.142157	4.81647e-05
												0.142224	4.80032e-05
												0.142287	4.75281e-05
												0.142341	4.67719e-05
												0.142382	4.5786e-05
												0.142408	4.46376e-05
												0.142417	4.34051e-05
