# Supplementary material for: Exploring a link between the Middle Eocene Climatic Optimum and Neotethys continental arc flare-up
Source: Copernicus journal article supplement (doi:10.5194/cp-17-229-2021), 2021-01-18
Supplement: Supplementary file 7 [file S16_VU101B-A3db.xls]

## Sheet: Summary Table
	Relative Abundances			36Ar [fA]	%1s	37Ar [fA]	%1s	38Ar [fA]	%1s	39Ar [fA]	%1s	40Ar [fA]	%1s	40(r)/39(k)	± 2s	Age	± 2s	40Ar(r)	39Ar(k)	K/Ca	± 2s		Procedure Blanks		36Ar [fA]	1s	37Ar [fA]	1s	38Ar [fA]	1s	39Ar [fA]	1s	40Ar [fA]	1s		Sample Parameters		Sample	Material	Location	Analyst	Standard	%1s	J	%1s	MDF	%1s	Volume Ratio	Sensitivity
																(Ma)		(%)	(%)																							(in Ma)							(mol/volt)
	079_VU101B-A3B	15	4	0.0422265	1.28124	96.7327	0.947248	0.195262	0.556495	16.9989	0.181878	122.928	0.0324435	6.9642	0.0337571	38.8935	0.186537	95.9348	8.36939	0.0752749	0.00145234		079_VU101B-A3B	15	0.0174629	0.0001375	0.0075399	0.0001011	0.0058513	5.62e-05	-0.781183	0.004368	4.68429	0.0040868		079_VU101B-A3B	15	079_VU101B-A3b	plagioclase	AZ16A	Klaudia Kuiper	28.201	0.08	0.0030819	0.1	0.974435	0.17	1	1e-13
	080_VU101B-A3B	25	4	0.112579	0.927388	283.281	0.941097	0.615522	0.387536	53.6683	0.173515	384.817	0.0303123	6.98401	0.0289373	39.0029	0.159894	97.0559	26.4308	0.0811752	0.00155382		080_VU101B-A3B	25	0.0174629	0.0001375	0.0075399	0.0001011	0.0058513	5.62e-05	-0.781183	0.004368	4.68429	0.0040868		080_VU101B-A3B	25	080_VU101B-A3b	plagioclase	AZ16A	Klaudia Kuiper	28.201	0.08	0.0030819	0.1	0.974435	0.17	1	1e-13
	081_VU101B-A3B	30	4	0.0427964	1.40651	120.432	0.954245	0.27543	0.493959	24.149	0.181104	169.961	0.0335151	6.92439	0.0310036	38.6735	0.171342	98.0551	11.8954	0.0859339	0.00166952		081_VU101B-A3B	30	0.0174629	0.0001375	0.0075399	0.0001011	0.0058513	5.62e-05	-0.781183	0.004368	4.68429	0.0040868		081_VU101B-A3B	30	081_VU101B-A3b	plagioclase	AZ16A	Klaudia Kuiper	28.201	0.08	0.0030819	0.1	0.974435	0.17	1	1e-13
	083_VU101B-A3B	35	4	0.0281092	1.58061	78.4965	0.975373	0.186366	0.478809	16.385	0.181042	115.651	0.0341332	6.94534	0.031658	38.7893	0.174948	98.0811	8.072	0.0894666	0.00177528		083_VU101B-A3B	35	0.0185357	0.0001589	0.0078621	0.0001211	0.0064467	9.42e-05	-0.776073	0.00525	4.71271	0.0057105		083_VU101B-A3B	35	083_VU101B-A3b	plagioclase	AZ16A	Klaudia Kuiper	28.201	0.08	0.0030819	0.1	0.974435	0.17	1	1e-13
	084_VU101B-A3B	40	4	0.0245484	1.64277	71.5907	0.964028	0.176173	0.494231	15.4779	0.182423	109.19	0.0378534	6.96642	0.0315317	38.9058	0.174239	98.4434	7.62599	0.0926765	0.00181877		084_VU101B-A3B	40	0.0185357	0.0001589	0.0078621	0.0001211	0.0064467	9.42e-05	-0.776073	0.00525	4.71271	0.0057105		084_VU101B-A3B	40	084_VU101B-A3b	plagioclase	AZ16A	Klaudia Kuiper	28.201	0.08	0.0030819	0.1	0.974435	0.17	1	1e-13
	085_VU101B-A3B	45	4	0.0181149	2.50283	49.4585	0.992193	0.123691	0.700179	10.8468	0.189476	76.437	0.0405471	6.92818	0.0377626	38.6944	0.208694	98.0122	5.34446	0.0940141	0.00189953		085_VU101B-A3B	45	0.0185357	0.0001589	0.0078621	0.0001211	0.0064467	9.42e-05	-0.776073	0.00525	4.71271	0.0057105		085_VU101B-A3B	45	085_VU101B-A3b	plagioclase	AZ16A	Klaudia Kuiper	28.201	0.08	0.0030819	0.1	0.974435	0.17	1	1e-13
	087_VU101B-A3B	50	4	0.0172584	2.1943	48.441	1.03342	0.117638	0.663884	10.3713	0.199931	73.0487	0.0384035	6.93559	0.0369157	38.7354	0.204008	98.1609	5.10982	0.0917746	0.00193224		087_VU101B-A3B	50	0.0185351	0.0002238	0.0078207	0.0001106	0.0062318	8.48e-05	-0.767839	0.0042339	4.69306	0.0049467		087_VU101B-A3B	50	087_VU101B-A3b	plagioclase	AZ16A	Klaudia Kuiper	28.201	0.08	0.0030819	0.1	0.974435	0.17	1	1e-13
	088_VU101B-A3B	55	4	0.014379	2.39373	41.5468	0.988666	0.101898	0.623795	8.90316	0.193039	62.7685	0.0378064	6.95676	0.0369682	38.8524	0.204285	98.3656	4.38649	0.0918562	0.00185083		088_VU101B-A3B	55	0.0185351	0.0002238	0.0078207	0.0001106	0.0062318	8.48e-05	-0.767839	0.0042339	4.69306	0.0049467		088_VU101B-A3B	55	088_VU101B-A3b	plagioclase	AZ16A	Klaudia Kuiper	28.201	0.08	0.0030819	0.1	0.974435	0.17	1	1e-13
	089_VU101B-A3B	60	4	0.0155009	2.73981	44.0168	1.03992	0.105969	0.673501	9.32339	0.187868	65.6115	0.0410745	6.93422	0.0393042	38.7278	0.217209	98.2221	4.59336	0.0907908	0.00191907		089_VU101B-A3B	60	0.0185351	0.0002238	0.0078207	0.0001106	0.0062318	8.48e-05	-0.767839	0.0042339	4.69306	0.0049467		089_VU101B-A3B	60	089_VU101B-A3b	plagioclase	AZ16A	Klaudia Kuiper	28.201	0.08	0.0030819	0.1	0.974435	0.17	1	1e-13
	091_VU101B-A3B	65	4	0.0089946	4.26648	26.0401	1.13078	0.0629837	0.729778	5.59701	0.220481	39.3019	0.0445376	6.92971	0.0525115	38.7029	0.290201	98.3773	2.75761	0.0921342	0.00212316		091_VU101B-A3B	65	0.0185615	0.000137	0.0081844	9.08e-05	0.0063227	7.98e-05	-0.768066	0.0035917	4.69937	0.0030203		091_VU101B-A3B	65	091_VU101B-A3b	plagioclase	AZ16A	Klaudia Kuiper	28.201	0.08	0.0030819	0.1	0.974435	0.17	1	1e-13
	092_VU101B-A3B	70	4	0.00966307	2.65853	28.9329	1.04835	0.0671492	0.727666	5.88292	0.225076	41.4808	0.0492548	6.97052	0.0426119	38.9284	0.235463	98.5305	2.89795	0.0871425	0.00186904		092_VU101B-A3B	70	0.0185615	0.000137	0.0081844	9.08e-05	0.0063227	7.98e-05	-0.768066	0.0035917	4.69937	0.0030203		092_VU101B-A3B	70	092_VU101B-A3b	plagioclase	AZ16A	Klaudia Kuiper	28.201	0.08	0.0030819	0.1	0.974435	0.17	1	1e-13
	094_VU101B-A3B	110	4	0.00608973	4.69621	20.3142	1.15911	0.0492226	1.00369	4.41165	0.239406	30.8993	0.0528606	6.9756	0.0527128	38.9565	0.291273	99.2855	2.17366	0.0930941	0.00220398		094_VU101B-A3B	110	0.0184808	0.0001314	0.008	0.0001116	0.0062495	8.04e-05	-0.776761	0.0040366	4.61935	0.0041941		094_VU101B-A3B	110	094_VU101B-A3b	plagioclase	AZ16A	Klaudia Kuiper	28.201	0.08	0.0030819	0.1	0.974435	0.17	1	1e-13
	095_VU101B-A3B	150	4	0.0330314	1.2738	105.746	0.950049	0.238175	0.41797	20.9984	0.17755	147.65	0.036149	6.98157	0.0295387	38.9895	0.163218	98.9536	10.3431	0.0850976	0.00164513		095_VU101B-A3B	150	0.0184808	0.0001314	0.008	0.0001116	0.0062495	8.04e-05	-0.776761	0.0040366	4.61935	0.0041941		095_VU101B-A3B	150	095_VU101B-A3b	plagioclase	AZ16A	Klaudia Kuiper	28.201	0.08	0.0030819	0.1	0.974435	0.17	1	1e-13
			S	0.373291	0.481078	1015.03	0.347526	2.31548	0.162942	203.014	0.0632753	1439.75	0.0117431
	Information on Analysis and Constants Used in Calculations									Results		40(a)/36(a)	± 2s	40(r)/39(k)	± 2s	Age	± 2s	MSWD	39Ar(k)	K/Ca	± 2s
																(Ma)			(%,n)
	Sample = 079_VU101B-A3B				Age Equations = Min et al. (2000)					Age Plateau				6.95546	0.0122583	38.8452	0.102459	1.55512	100	0.0873809	0.00334316
	Material = plagioclase				Negative Intensities = Allowed										0.0017624		0.00263763	0.0970337	13
	Location = AZ16A				Decay Constant 40K = 5.460 ± 0.053 E-10 1/a					Full External Error							0.813402	1.8165	2σ Confidence Limit
	Analyst = Klaudia Kuiper				Decay Constant 39Ar = 2.940 ± 0.016 E-07 1/h					Analytical Error							0.0677393	1.24704	Error Magnification
	Project = VU101				Decay Constant 37Ar = 8.230 ± 0.012 E-04 1/h
	Mass Discrimination Law = LIN				Decay Constant 36Cl = 2.257 ± 0.015 E-06 1/a					Total Fusion Age				6.95953	0.010954	38.8677	0.0978779		13	0.085714	0.000605621
	Irradiation = VU101				Decay Activity 40K(EC,β⁺) = 3.310 ± 0.030 1/gs										0.00157396		0.00251823
	J = 0.00308190 ± 0.00000308				Decay Activity 40K(β⁻) = 27.890 ± 0.150 1/gs					Full External Error							0.813298
	FCs = 28.201 ± 0.023 Ma				Atmospheric Ratio 40/36(a) = 298.56 ± 0.31					Analytical Error							0.0605313
	IGSN = Undefined				Atmospheric Ratio 38/36(a) = 0.1885 ± 0.0003
	Preferred Age = Undefined				Production Ratio 39/37(ca) = 0.000673 ± 0.000004					Normal Isochron Error Chron		233.703	82.3561	6.98834	0.0410172	39.0269	0.239435	3.12296	100
	Classification = Undefined				Production Ratio 36/37(ca) = 0.000264 ± 0.000002								0.352397		0.00586937		0.00613513	0.000316664	13
	Experiment Type = Undefined				Production Ratio 40/39(k) = 0.000860 ± 0.000070					Full External Error							0.845287	1.8528	2σ Confidence Limit
	Extraction Method = Undefined				Production Ratio 38/39(k) = 0.012110 ± 0.000030					Analytical Error							0.226639	1.76719	Error Magnification
	Heating = 45 sec				Production Ratio 36/38(cl) = 262.80 ± 1.71												1		Number of Iterations
	Isolation = 5.00 min				Scaling Ratio K/Ca = 0.430												1.56446e-05		Convergence
	Instrument = HELIX				Abundance Ratio 40K/K = 1.1700 ± 0.0100 E-04
	Lithology = Undefined				Atomic Weight K = 39.0983 ± 0.0001 g					Inverse Isochron Clustered Points		320.342	62.8564	6.94547	0.0325771	38.79	0.19571	1.6266	100
	Lat-Lon = Undefined - Undefined												0.196217		0.00469041		0.00504536	0.0841059	13
	Feature = Undefined									Full External Error							0.829213	1.8528	2σ Confidence Limit
										Analytical Error							0.180027	1.27538	Error Magnification
																	4		Number of Iterations
																	4.79098e-05		Convergence
																	0.0318094		Spreading Factor
[truncated: 39 more columns]

## Sheet: Hidden Data
Double Line Plot Age Plateau			Double Line Plot K/Ca Plateau			X-Y Plot Normal Isochron		X-Y Plot Inverse Isochron		Error Ellipses Normal Isochron		Error Ellipses Inverse Isochron
Ar39k%	Line 1	Line 2	Ar39k%	Line 1	Line 2	X-axis	Y-axis	X-axis	Y-axis	X-axis	Y-axis	X-axis	Y-axis
0	38.707	39.08	0	0.0738226	0.0767273	1014.66	7364.89	0.13777	0.000135779			0.138282	0.000135795
8.36939	38.707	39.08	8.36939	0.0738226	0.0767273	1415.03	10181.1	0.138985	9.82211e-05			0.138264	0.000133205
8.36939	39.1628	38.843	8.36939	0.0827291	0.0796214	2187.54	15446	0.141626	6.47419e-05			0.138213	0.000130791
34.8002	39.1628	38.843	34.8002	0.0827291	0.0796214	2211.18	15655.9	0.141236	6.38736e-05			0.138132	0.000128717
34.8002	38.5021	38.8448	34.8002	0.0842644	0.0876034	2731.67	19328.6	0.141328	5.17369e-05			0.138026	0.000127124
46.6956	38.5021	38.8448	46.6956	0.0842644	0.0876034	2137.93	15110.6	0.141486	6.61789e-05			0.137903	0.000126121
46.6956	38.9642	38.6143	46.6956	0.0912419	0.0876914	2312.95	16340.2	0.141549	6.11986e-05			0.13777	0.000125776
54.7676	38.9642	38.6143	54.7676	0.0912419	0.0876914	2602.22	18401.5	0.141413	5.43433e-05			0.137638	0.000126113
54.7676	38.7315	39.08	54.7676	0.0908578	0.0944953	2395.03	16906.2	0.141666	5.91499e-05			0.137515	0.000127108
62.3936	38.7315	39.08	62.3936	0.0908578	0.0944953	2631.8	18536.2	0.141982	5.39486e-05			0.137409	0.000128695
62.3936	38.9031	38.4857	62.3936	0.0959136	0.0921145	2895.82	20483.9	0.14137	4.88188e-05			0.137328	0.000130764
67.738	38.9031	38.4857	67.738	0.0959136	0.0921145	6051.23	42509.5	0.14235	2.35242e-05			0.137277	0.000133175
67.738	38.5314	38.9394	67.738	0.0898424	0.0937069	4091.71	28865.1	0.141753	3.46439e-05			0.137259	0.000135764
72.8478	38.5314	38.9394	72.8478	0.0898424	0.0937069							0.137277	0.000138354
72.8478	39.0566	38.6481	72.8478	0.0937071	0.0900054							0.137328	0.000140768
77.2343	39.0566	38.6481	77.2343	0.0937071	0.0900054							0.137409	0.000142842
77.2343	38.5106	38.945	77.2343	0.0888717	0.0927099							0.137515	0.000144435
81.8277	38.5106	38.945	81.8277	0.0888717	0.0927099							0.137638	0.000145438
81.8277	38.9931	38.4127	81.8277	0.0942573	0.090011							0.13777	0.000145783
84.5853	38.9931	38.4127	84.5853	0.0942573	0.090011							0.137903	0.000145446
84.5853	38.6929	39.1639	84.5853	0.0852735	0.0890116							0.138026	0.00014445
87.4832	38.6929	39.1639	87.4832	0.0852735	0.0890116							0.138132	0.000142864
87.4832	39.2477	38.6652	87.4832	0.0952981	0.0908902							0.138213	0.000140794
89.6569	39.2477	38.6652	89.6569	0.0952981	0.0908902							0.138264	0.000138383
89.6569	38.8263	39.1527	89.6569	0.0834525	0.0867427							0.138282	0.000135795
100	38.8263	39.1527	100	0.0834525	0.0867427
												0.139477	9.82313e-05
												0.13946	9.64187e-05
												0.139411	9.4729e-05
												0.139333	9.32772e-05
												0.139231	9.21624e-05
												0.139113	9.14604e-05
												0.138985	9.12192e-05
												0.138858	9.14551e-05
												0.13874	9.21521e-05
												0.138638	9.32628e-05
												0.13856	9.47113e-05
												0.138511	9.6399e-05
												0.138494	9.82108e-05
												0.138511	0.000100023
												0.13856	0.000101713
												0.138638	0.000103165
												0.13874	0.00010428
												0.138858	0.000104982
												0.138985	0.000105223
												0.139113	0.000104987
												0.139231	0.00010429
												0.139333	0.000103179
												0.139411	0.000101731
												0.13946	0.000100043
												0.139477	9.82313e-05
												0.142149	6.47497e-05
												0.142131	6.26047e-05
												0.142079	6.06053e-05
												0.141996	5.88878e-05
												0.141887	5.75693e-05
												0.141761	5.67395e-05
												0.141626	5.64551e-05
												0.14149	5.67355e-05
												0.141364	5.75614e-05
												0.141255	5.88767e-05
												0.141172	6.05917e-05
												0.14112	6.25895e-05
												0.141102	6.4734e-05
												0.14112	6.6879e-05
												0.141172	6.88784e-05
												0.141255	7.05959e-05
												0.141364	7.19144e-05
												0.14149	7.27442e-05
												0.141626	7.30286e-05
												0.141761	7.27482e-05
												0.141887	7.19223e-05
												0.141996	7.0607e-05
												0.142079	6.8892e-05
												0.142131	6.68942e-05
												0.142149	6.47497e-05
												0.141758	6.38816e-05
												0.14174	6.16171e-05
												0.141688	5.95064e-05
												0.141605	5.76933e-05
												0.141497	5.63013e-05
												0.141371	5.54254e-05
												0.141236	5.51252e-05
												0.141101	5.54212e-05
												0.140975	5.62932e-05
												0.140866	5.76818e-05
												0.140783	5.94924e-05
												0.140731	6.16015e-05
												0.140714	6.38655e-05
												0.140731	6.613e-05
												0.140783	6.82408e-05
												0.140866	7.00539e-05
												0.140975	7.14458e-05
												0.141101	7.23217e-05
												0.141236	7.26219e-05
												0.141371	7.23259e-05
												0.141497	7.14539e-05
												0.141605	7.00653e-05
												0.141688	6.82547e-05
												0.14174	6.61456e-05
												0.141758	6.38816e-05
												0.141857	5.17449e-05
												0.141839	4.95695e-05
												0.141786	4.75418e-05
												0.141702	4.58e-05
												0.141593	4.44628e-05
												0.141465	4.36213e-05
												0.141328	4.33329e-05
												0.141192	4.36172e-05
												0.141064	4.44548e-05
												0.140955	4.57888e-05
												0.140871	4.7528e-05
												0.140818	4.95541e-05
												0.1408	5.1729e-05
												0.140818	5.39044e-05
												0.140871	5.59321e-05
												0.140955	5.76739e-05
												0.141064	5.90111e-05
												0.141192	5.98525e-05
												0.141328	6.0141e-05
												0.141465	5.98567e-05
												0.141593	5.9019e-05
												0.141702	5.76851e-05
												0.141786	5.59458e-05
												0.141839	5.39197e-05
												0.141857	5.17449e-05
												0.142036	6.61901e-05
												0.142017	6.29463e-05
												0.141963	5.99228e-05
												0.141875	5.73256e-05
												0.141761	5.53318e-05
												0.141629	5.40772e-05
												0.141486	5.36473e-05
												0.141344	5.40714e-05
												0.141211	5.53206e-05
												0.141097	5.73098e-05
												0.14101	5.99034e-05
												0.140955	6.29247e-05
												0.140936	6.61677e-05
												0.140955	6.94115e-05
												0.14101	7.2435e-05
												0.141097	7.50322e-05
												0.141211	7.7026e-05
												0.141344	7.82807e-05
												0.141486	7.87106e-05
												0.141629	7.82865e-05
												0.141761	7.70373e-05
												0.141875	7.50481e-05
												0.141963	7.24545e-05
												0.142017	6.94332e-05
												0.142036	6.61901e-05
												0.142128	6.12075e-05
												0.142108	5.8306e-05
												0.14205	5.56016e-05
												0.141958	5.32786e-05
												0.141838	5.14954e-05
												0.141699	5.03734e-05
												0.141549	4.99892e-05
												0.1414	5.03689e-05
												0.14126	5.14865e-05
												0.14114	5.32661e-05
												0.141049	5.55862e-05
												0.140991	5.82889e-05
												0.140971	6.11898e-05
												0.140991	6.40913e-05
												0.141049	6.67957e-05
												0.14114	6.91186e-05
												0.14126	7.09019e-05
												0.1414	7.20238e-05
												0.141549	7.24081e-05
												0.141699	7.20284e-05
												0.141838	7.09107e-05
												0.141958	6.91312e-05
												0.14205	6.6811e-05
												0.142108	6.41084e-05
												0.142128	6.12075e-05
												0.141971	5.43511e-05
												0.141952	5.13187e-05
												0.141896	4.84923e-05
												0.141808	4.60647e-05
												0.141692	4.42012e-05
												0.141557	4.3029e-05
												0.141413	4.26277e-05
												0.141268	4.30249e-05
												0.141134	4.41934e-05
												0.141018	4.60535e-05
												0.14093	4.84787e-05
												0.140874	5.13034e-05
												0.140855	5.43354e-05
												0.140874	5.73678e-05
												0.14093	6.01942e-05
												0.141018	6.26218e-05
												0.141134	6.44853e-05
												0.141268	6.56576e-05
												0.141413	6.60588e-05
												0.141557	6.56617e-05
												0.141692	6.44932e-05
												0.141808	6.2633e-05
												0.141896	6.02079e-05
												0.141952	5.73831e-05
												0.141971	5.43512e-05
												0.142212	5.91603e-05
												0.142194	5.56268e-05
												0.142139	5.23334e-05
												0.142052	4.95046e-05
												0.141939	4.7333e-05
												0.141807	4.59668e-05
												0.141666	4.5499e-05
												0.141524	4.59614e-05
												0.141392	4.73227e-05
												0.141279	4.94899e-05
												0.141192	5.23155e-05
												0.141138	5.56068e-05
												0.141119	5.91396e-05
												0.141138	6.2673e-05
												0.141192	6.59664e-05
												0.141279	6.87953e-05
												0.141392	7.09668e-05
												0.141524	7.2333e-05
												0.141666	7.28009e-05
												0.141807	7.23384e-05
												0.141939	7.09772e-05
												0.142052	6.88099e-05
												0.142139	6.59844e-05
												0.142194	6.26931e-05
												0.142212	5.91603e-05
												0.142623	5.39581e-05
												0.142601	4.87677e-05
												0.142537	4.39303e-05
												0.142435	3.97757e-05
												0.142302	3.65869e-05
												0.142148	3.45814e-05
												0.141982	3.38956e-05
												0.141816	3.45764e-05
												0.141662	3.65774e-05
												0.141529	3.97623e-05
												0.141427	4.39139e-05
												0.141363	4.87493e-05
												0.141341	5.39391e-05
												0.141363	5.91295e-05
												0.141427	6.39668e-05
												0.141529	6.81215e-05
												0.141662	7.13102e-05
												0.141816	7.33158e-05
												0.141982	7.40016e-05
												0.142148	7.33207e-05
												0.142302	7.13197e-05
												0.142435	6.81349e-05
												0.142537	6.39833e-05
												0.142601	5.91479e-05
												0.142623	5.39581e-05
												0.142024	4.8829e-05
												0.142002	4.54154e-05
												0.141936	4.22336e-05
												0.141833	3.95007e-05
												0.141697	3.74027e-05
												0.14154	3.60828e-05
												0.14137	3.56307e-05
												0.141201	3.60774e-05
												0.141044	3.73925e-05
												0.140908	3.94862e-05
												0.140804	4.22159e-05
												0.140739	4.53956e-05
												0.140717	4.88085e-05
												0.140739	5.22222e-05
												0.140804	5.54039e-05
												0.140908	5.81369e-05
												0.141044	6.02349e-05
												0.141201	6.15548e-05
												0.14137	6.20069e-05
												0.14154	6.15601e-05
												0.141697	6.02451e-05
												0.141833	5.81514e-05
												0.141936	5.54217e-05
												0.142002	5.2242e-05
												0.142024	4.88291e-05
												0.14305	2.35295e-05
												0.143026	1.85923e-05
												0.142956	1.39912e-05
												0.142845	1.00397e-05
												0.1427	7.00716e-06
												0.142531	5.10024e-06
												0.14235	4.44888e-06
												0.142169	5.09746e-06
												0.142	7.0018e-06
												0.141855	1.00321e-05
												0.141744	1.39819e-05
												0.141674	1.85819e-05
												0.14165	2.35188e-05
												0.141674	2.8456e-05
												0.141744	3.30572e-05
												0.141855	3.70086e-05
												0.142	4.00412e-05
												0.142169	4.19481e-05
												0.14235	4.25995e-05
												0.142531	4.19509e-05
												0.1427	4.00465e-05
												0.142845	3.70162e-05
												0.142956	3.30665e-05
												0.143026	2.84664e-05
												0.14305	2.35295e-05
												0.142268	3.46489e-05
												0.142251	3.27957e-05
												0.142199	3.10684e-05
												0.142117	2.95848e-05
												0.14201	2.8446e-05
												0.141886	2.77296e-05
												0.141753	2.74843e-05
												0.141619	2.7727e-05
												0.141495	2.8441e-05
												0.141388	2.95778e-05
												0.141306	3.10598e-05
												0.141255	3.27861e-05
												0.141237	3.46389e-05
												0.141255	3.64921e-05
												0.141306	3.82194e-05
												0.141388	3.9703e-05
												0.141495	4.08418e-05
												0.141619	4.15583e-05
												0.141753	4.18035e-05
												0.141886	4.15608e-05
												0.14201	4.08468e-05
												0.142117	3.971e-05
												0.142199	3.8228e-05
												0.142251	3.65018e-05
												0.142268	3.46489e-05
