# Supplementary material for: Exploring a link between the Middle Eocene Climatic Optimum and Neotethys continental arc flare-up
Source: Copernicus journal article supplement (doi:10.5194/cp-17-229-2021), 2021-01-18
Supplement: Supplementary file 8 [file S17_VU101B-A4e.xls]

## Sheet: Summary Table
	Relative Abundances			36Ar [fA]	%1s	37Ar [fA]	%1s	38Ar [fA]	%1s	39Ar [fA]	%1s	40Ar [fA]	%1s	40(r)/39(k)	± 2s	Age	± 2s	40Ar(r)	39Ar(k)	K/Ca	± 2s		Procedure Blanks		36Ar [fA]	1s	37Ar [fA]	1s	38Ar [fA]	1s	39Ar [fA]	1s	40Ar [fA]	1s		Sample Parameters		Sample	Material	Location	Analyst	Standard	%1s	J	%1s	MDF	%1s	Volume Ratio	Sensitivity
																(Ma)		(%)	(%)																							(in Ma)							(mol/volt)
	064_VU101B-A8	0		0.00627517	5.48832	3.96056	1.72582	0.038952	0.698236	3.26613	0.236556	23.3167	0.0445633	6.66546	0.0708593	37.0159	0.389556	93.2917	13.0857	0.354316	0.0123442		064_VU101B-A8	0	0.0169004	0.0001768	0.0092704	0.0001006	0.0068585	0.0001052	-0.0041592	0.0038692	3.76818	0.0060283		064_VU101B-A8	0	064_VU101B-A8	glass	X1.14B	Klaudia Kuiper	28.201	0.08	0.003063	0.1	0.973769	0.1	1	1e-13
	060_VU101B-A8	0	4	0.00457735	5.55515	5.01078	1.67166	0.0244624	1.21951	2.06505	0.370887	16.9033	0.0659271	7.72664	0.0942579	42.8405	0.516546	94.2411	8.26684	0.176923	0.00605941		060_VU101B-A8	0	0.0156329	0.0001928	0.0092643	8.49e-05	0.0062903	0.0001062	-0.0057881	0.0043164	3.7628	0.0055113		060_VU101B-A8	0	060_VU101B-A8	glass	X1.14B	Klaudia Kuiper	28.201	0.08	0.003063	0.1	0.973769	0.1	1	1e-13
	055_VU101B-A8	0	4	0.00598987	6.75268	6.56147	2.08038	0.0286122	0.974661	2.40158	0.303506	19.7963	0.0408633	7.72709	0.111779	42.843	0.612566	93.5684	9.61206	0.157096	0.00660584		055_VU101B-A8	0	0.0145418	0.0001569	0.0088255	8.11e-05	0.005795	9.5e-05	0.0017759	0.0039224	3.64997	0.0037305		055_VU101B-A8	0	055_VU101B-A8	glass	X1.14B	Klaudia Kuiper	28.201	0.08	0.003063	0.1	0.973769	0.1	1	1e-13
	061_VU101B-A8	0	4	0.0065074	6.08377	4.12924	1.38852	0.0350521	1.01252	2.95102	0.279898	24.5995	0.0444056	7.79433	0.0916748	43.2115	0.502289	93.4148	11.8218	0.307016	0.0086978		061_VU101B-A8	0	0.0156329	0.0001928	0.0092643	8.49e-05	0.0062903	0.0001062	-0.0057881	0.0043164	3.7628	0.0055113		061_VU101B-A8	0	061_VU101B-A8	glass	X1.14B	Klaudia Kuiper	28.201	0.08	0.003063	0.1	0.973769	0.1	1	1e-13
	059_VU101B-A8	0	4	0.00665396	3.97222	8.52525	1.24065	0.049557	0.81128	4.21998	0.204156	34.1879	0.0420059	7.79966	0.049863	43.2406	0.273196	96.144	16.8981	0.212559	0.00534538		059_VU101B-A8	0	0.0156329	0.0001928	0.0092643	8.49e-05	0.0062903	0.0001062	-0.0057881	0.0043164	3.7628	0.0055113		059_VU101B-A8	0	059_VU101B-A8	glass	X1.14B	Klaudia Kuiper	28.201	0.08	0.003063	0.1	0.973769	0.1	1	1e-13
	056_VU101B-A8	0	4	0.0137218	2.3423	6.53154	1.44206	0.0392703	0.932371	3.17627	0.285297	28.3469	0.0464628	7.80681	0.0758394	43.2798	0.41551	87.3542	12.7185	0.208818	0.00613963		056_VU101B-A8	0	0.0145418	0.0001569	0.0088255	8.11e-05	0.005795	9.5e-05	0.0017759	0.0039224	3.64997	0.0037305		056_VU101B-A8	0	056_VU101B-A8	glass	X1.14B	Klaudia Kuiper	28.201	0.08	0.003063	0.1	0.973769	0.1	1	1e-13
	052_VU101B-A8	0	4	0.00710201	3.52731	2.29319	2.5795	0.0111485	1.36111	0.835754	0.932728	8.45892	0.102649	7.81406	0.23253	43.3196	1.27396	77.0616	3.34499	0.156424	0.00858315		052_VU101B-A8	0	0.0142914	0.000155	0.0089253	0.0001024	0.0058659	9.95e-05	-0.0082187	0.0037837	3.55947	0.0051895		052_VU101B-A8	0	052_VU101B-A8	glass	X1.14B	Klaudia Kuiper	28.201	0.08	0.003063	0.1	0.973769	0.1	1	1e-13
	057_VU101B-A8	0	4	0.00600797	4.53953	7.56256	1.23632	0.033812	0.983983	2.84156	0.233607	23.4965	0.0473439	7.86062	0.0688967	43.5746	0.377412	94.8924	11.3736	0.161279	0.00405868		057_VU101B-A8	0	0.0145418	0.0001569	0.0088255	8.11e-05	0.005795	9.5e-05	0.0017759	0.0039224	3.64997	0.0037305		057_VU101B-A8	0	057_VU101B-A8	glass	X1.14B	Klaudia Kuiper	28.201	0.08	0.003063	0.1	0.973769	0.1	1	1e-13
	053_VU101B-A8	0		0.00471732	7.48155	4.29262	1.58738	0.019342	1.32945	1.59185	0.341125	14.2253	0.0847061	8.27823	0.145179	45.8608	0.794288	92.4681	6.37138	0.15917	0.00516903		053_VU101B-A8	0	0.0142914	0.000155	0.0089253	0.0001024	0.0058659	9.95e-05	-0.0082187	0.0037837	3.55947	0.0051895		053_VU101B-A8	0	053_VU101B-A8	glass	X1.14B	Klaudia Kuiper	28.201	0.08	0.003063	0.1	0.973769	0.1	1	1e-13
	063_VU101B-A8	0		0.000519989	56.8018	3.79324	1.73899	0.0183379	1.3021	1.62537	0.337875	13.5758	0.0762579	8.45326	0.12367	46.8182	0.676257	101.048	6.50712	0.183962	0.00651817		063_VU101B-A8	0	0.0169004	0.0001768	0.0092704	0.0001006	0.0068585	0.0001052	-0.0041592	0.0038692	3.76818	0.0060283		063_VU101B-A8	0	063_VU101B-A8	glass	X1.14B	Klaudia Kuiper	28.201	0.08	0.003063	0.1	0.973769	0.1	1	1e-13
			S	0.0620728	1.63158	52.6605	0.519713	0.298547	0.321149	24.9746	0.0947982	206.907	0.0170748
	Information on Analysis and Constants Used in Calculations									Results		40(a)/36(a)	± 2s	40(r)/39(k)	± 2s	Age	± 2s	MSWD	39Ar(k)	K/Ca	± 2s
																(Ma)			(%,n)
	Sample = 064_VU101B-A8				Age Equations = Min et al. (2000)					Age Plateau				7.79938	0.0329649	43.2391	0.199813	1.21362	74.0358	0.18762	0.0317895
	Material = glass				Negative Intensities = Allowed										0.00422661		0.00462112	0.295578	7
	Location = X1.14B				Decay Constant 40K = 5.460 ± 0.053 E-10 1/a					Full External Error							0.91934	2.1547	2σ Confidence Limit
	Analyst = Klaudia Kuiper				Decay Constant 39Ar = 2.940 ± 0.016 E-07 1/h					Analytical Error							0.180613	1.10164	Error Magnification
	Project = VU101				Decay Constant 37Ar = 8.230 ± 0.012 E-04 1/h
	Mass Discrimination Law = LIN				Decay Constant 36Cl = 2.257 ± 0.015 E-06 1/a					Total Fusion Age				7.71895	0.0285401	42.7984	0.177823		10	0.203641	0.00215172
	Irradiation = VU101				Decay Activity 40K(EC,β⁺) = 3.310 ± 0.030 1/gs										0.00369741		0.00415491
	J = 0.00306300 ± 0.00000306				Decay Activity 40K(β⁻) = 27.890 ± 0.150 1/gs					Full External Error							0.905923
	FCs = 28.201 ± 0.023 Ma				Atmospheric Ratio 40/36(a) = 298.56 ± 0.31					Analytical Error							0.156408
	IGSN = Undefined				Atmospheric Ratio 38/36(a) = 0.1885 ± 0.0003
	Preferred Age = Undefined				Production Ratio 39/37(ca) = 0.000673 ± 0.000004					Normal Isochron		296.809	30.9121	7.80027	0.0679525	43.244	0.381993	1.52812	74.0358
	Classification = Undefined				Production Ratio 36/37(ca) = 0.000264 ± 0.000002								0.104148		0.00871156		0.00883343	0.177187	7
	Experiment Type = Undefined				Production Ratio 40/39(k) = 0.000860 ± 0.000070					Full External Error							0.975377	2.26491	2σ Confidence Limit
	Extraction Method = Undefined				Production Ratio 38/39(k) = 0.012110 ± 0.000030					Analytical Error							0.372307	1.23617	Error Magnification
	Heating = 45 sec				Production Ratio 36/38(cl) = 262.80 ± 1.71												13		Number of Iterations
	Isolation = 5.00 min				Scaling Ratio K/Ca = 0.430												7.77017e-05		Convergence
	Instrument = HELIX				Abundance Ratio 40K/K = 1.1700 ± 0.0100 E-04
	Lithology = Undefined				Atomic Weight K = 39.0983 ± 0.0001 g					Inverse Isochron		301.763	30.1535	7.79366	0.0661618	43.2078	0.372428	1.44176	74.0358
	Lat-Lon = Undefined - Undefined												0.0999244		0.00848918		0.00861946	0.205569	7
	Feature = Undefined									Full External Error							0.970983	2.26491	2σ Confidence Limit
										Analytical Error							0.362503	1.20073	Error Magnification
																	2		Number of Iterations
																	0.000367692		Convergence
																	0.192135		Spreading Factor
[truncated: 39 more columns]

## Sheet: Hidden Data
Double Line Plot Age Plateau			Double Line Plot K/Ca Plateau			X-Y Plot Normal Isochron		X-Y Plot Inverse Isochron		Error Ellipses Normal Isochron		Error Ellipses Inverse Isochron
Ar39k%	Line 1	Line 2	Ar39k%	Line 1	Line 2	X-axis	Y-axis	X-axis	Y-axis	X-axis	Y-axis	X-axis	Y-axis
0	36.6263	37.4054	0	0.341972	0.36666	624.04	4458.07	0.13998	0.000224312			0.140654	0.000224349
13.0857	36.6263	37.4054	13.0857	0.341972	0.36666	633.483	5193.26	0.121982	0.000192557			0.140631	0.000216689
13.0857	43.3571	42.324	13.0857	0.182982	0.170863	563.026	4649.11	0.121104	0.000215095			0.140564	0.000209548
21.3526	43.3571	42.324	21.3526	0.182982	0.170863	544.229	4540.46	0.119862	0.000220242			0.140457	0.000203414
21.3526	42.2304	43.4555	21.3526	0.15049	0.163702	957.065	7763.34	0.12328	0.00012881			0.140317	0.000198704
30.9646	42.2304	43.4555	30.9646	0.15049	0.163702	264.379	2362.51	0.111906	0.000423278			0.140154	0.000195738
30.9646	43.7137	42.7092	30.9646	0.315714	0.298319	128.407	1301.94	0.0986274	0.000768083			0.13998	0.000194721
42.7864	43.7137	42.7092	42.7864	0.315714	0.298319	707.093	5856.75	0.120731	0.000170743			0.139805	0.000195719
42.7864	42.9674	43.5138	42.7864	0.207214	0.217905	443.341	3968.64	0.111711	0.000251975			0.139642	0.000198667
59.6845	42.9674	43.5138	59.6845	0.207214	0.217905	-3370.85	-28196.1	0.11955	-3.54658e-05			0.139503	0.000203362
59.6845	43.6953	42.8643	59.6845	0.214958	0.202678							0.139396	0.000209484
72.4029	43.6953	42.8643	72.4029	0.214958	0.202678							0.139328	0.000216617
72.4029	42.0456	44.5935	72.4029	0.147841	0.165007							0.139305	0.000224275
75.7479	42.0456	44.5935	75.7479	0.147841	0.165007							0.139328	0.000231935
75.7479	43.952	43.1972	75.7479	0.165338	0.15722							0.139396	0.000239076
87.1215	43.952	43.1972	87.1215	0.165338	0.15722							0.139503	0.00024521
87.1215	45.0665	46.6551	87.1215	0.154001	0.164339							0.139642	0.000249921
93.4929	45.0665	46.6551	93.4929	0.154001	0.164339							0.139805	0.000252886
93.4929	47.4944	46.1419	93.4929	0.19048	0.177444							0.13998	0.000253904
100	47.4944	46.1419	100	0.19048	0.177444							0.140154	0.000252905
												0.140317	0.000249958
												0.140457	0.000245263
												0.140564	0.00023914
												0.140631	0.000232007
												0.140654	0.000224349
												0.122902	0.000192602
												0.122871	0.000184779
												0.122779	0.000177486
												0.122633	0.00017122
												0.122442	0.000166408
												0.12222	0.000163378
												0.121982	0.000162337
												0.121744	0.000163355
												0.121522	0.000166363
												0.121331	0.000171157
												0.121185	0.000177409
												0.121093	0.000184693
												0.121061	0.000192513
												0.121093	0.000200336
												0.121185	0.000207629
												0.121331	0.000213895
												0.121522	0.000218707
												0.121744	0.000221737
												0.121982	0.000222778
												0.12222	0.00022176
												0.122442	0.000218752
												0.122633	0.000213958
												0.122779	0.000207706
												0.122871	0.000200422
												0.122902	0.000192602
												0.121847	0.000215118
												0.121822	0.000204494
												0.121748	0.000194592
												0.121629	0.000186088
												0.121476	0.00017956
												0.121296	0.000175454
												0.121104	0.000174049
												0.120912	0.000175442
												0.120732	0.000179537
												0.120578	0.000186055
												0.12046	0.000194552
												0.120386	0.000204449
												0.120361	0.000215071
												0.120386	0.000225696
												0.12046	0.000235597
												0.120578	0.000244102
												0.120732	0.00025063
												0.120912	0.000254736
												0.121104	0.000256141
												0.121296	0.000254748
												0.121476	0.000250653
												0.121629	0.000244135
												0.121748	0.000235638
												0.121822	0.000225741
												0.121847	0.000215118
												0.120542	0.000220273
												0.120519	0.000211933
												0.120451	0.000204159
												0.120343	0.000197481
												0.120202	0.000192354
												0.120038	0.000189128
												0.119862	0.000188022
												0.119686	0.000189112
												0.119522	0.000192324
												0.119381	0.000197438
												0.119273	0.000204106
												0.119205	0.000211873
												0.119182	0.000220211
												0.119205	0.000228551
												0.119273	0.000236325
												0.119381	0.000243003
												0.119522	0.00024813
												0.119686	0.000251356
												0.119862	0.000252462
												0.120038	0.000251372
												0.120202	0.00024816
												0.120343	0.000243046
												0.120451	0.000236378
												0.120519	0.000228611
												0.120542	0.000220273
												0.123795	0.000128832
												0.123777	0.000124801
												0.123726	0.000121043
												0.123644	0.000117814
												0.123537	0.000115335
												0.123413	0.000113774
												0.12328	0.000113237
												0.123147	0.000113762
												0.123023	0.000115313
												0.122916	0.000117783
												0.122834	0.000121005
												0.122783	0.000124759
												0.122765	0.000128789
												0.122783	0.00013282
												0.122834	0.000136578
												0.122916	0.000139807
												0.123023	0.000142286
												0.123147	0.000143847
												0.12328	0.000144384
												0.123413	0.000143859
												0.123537	0.000142308
												0.123644	0.000139838
												0.123726	0.000136616
												0.123777	0.000132862
												0.123795	0.000128832
												0.112553	0.000423341
												0.112531	0.000417448
												0.112467	0.000411951
												0.112364	0.000407227
												0.11223	0.000403596
												0.112073	0.000401307
												0.111906	0.000400515
												0.111738	0.000401274
												0.111582	0.000403533
												0.111448	0.000407137
												0.111345	0.000411842
												0.11128	0.000417325
												0.111258	0.000423215
												0.11128	0.000429109
												0.111345	0.000434605
												0.111448	0.000439329
												0.111582	0.00044296
												0.111738	0.000445249
												0.111906	0.000446041
												0.112073	0.000445282
												0.11223	0.000443023
												0.112364	0.000439419
												0.112467	0.000434714
												0.112531	0.000429231
												0.112553	0.000423341
												0.100482	0.000768256
												0.100419	0.000752882
												0.100233	0.000738544
												0.0999387	0.000726219
												0.0995546	0.000716747
												0.0991074	0.000710774
												0.0986274	0.000708706
												0.0981475	0.000710684
												0.0977002	0.000716575
												0.0973162	0.000725975
												0.0970215	0.000738245
												0.0968362	0.000752549
												0.0967731	0.000767911
												0.0968362	0.000783285
												0.0970215	0.000797623
												0.0973162	0.000809948
												0.0977002	0.00081942
												0.0981475	0.000825393
												0.0986274	0.000827461
												0.0991074	0.000825482
												0.0995546	0.000819592
												0.0999387	0.000810192
												0.100233	0.000797921
												0.100419	0.000783618
												0.100482	0.000768256
												0.121308	0.000170775
												0.121288	0.000164734
												0.121231	0.000159102
												0.121139	0.000154263
												0.12102	0.000150548
												0.120881	0.000148209
												0.120731	0.000147405
												0.120582	0.000148192
												0.120443	0.000150516
												0.120324	0.000154218
												0.120232	0.000159046
												0.120174	0.000164672
												0.120155	0.000170711
												0.120174	0.000176752
												0.120232	0.000182384
												0.120324	0.000187223
												0.120443	0.000190938
												0.120582	0.000193278
												0.120731	0.000194081
												0.120881	0.000193294
												0.12102	0.00019097
												0.121139	0.000187268
												0.121231	0.00018244
												0.121288	0.000176814
												0.121308	0.000170775
												0.112498	0.000252078
												0.112471	0.000239211
												0.112392	0.000227214
												0.112267	0.000216904
												0.112104	0.000208984
												0.111915	0.000203994
												0.111711	0.000202274
												0.111507	0.000203941
												0.111318	0.000208881
												0.111155	0.000216758
												0.11103	0.000227035
												0.110951	0.000239012
												0.110924	0.000251872
												0.110951	0.000264739
												0.11103	0.000276737
												0.111155	0.000287047
												0.111318	0.000294966
												0.111507	0.000299956
												0.111711	0.000301677
												0.111915	0.00030001
												0.112104	0.00029507
												0.112267	0.000287192
												0.112392	0.000276915
												0.112471	0.000264939
												0.112498	0.000252078
												0.12038	-3.54539e-05
												0.120351	-4.67398e-05
												0.120268	-5.72573e-05
												0.120137	-6.62898e-05
												0.119965	-7.32217e-05
												0.119765	-7.75806e-05
												0.11955	-7.90694e-05
												0.119335	-7.75867e-05
												0.119135	-7.32336e-05
												0.118964	-6.63067e-05
												0.118832	-5.7278e-05
												0.118749	-4.67628e-05
												0.118721	-3.54778e-05
												0.118749	-2.41919e-05
												0.118832	-1.36744e-05
												0.118964	-4.64191e-06
												0.119135	2.28998e-06
												0.119335	6.64888e-06
												0.11955	8.13773e-06
												0.119765	6.65507e-06
												0.119965	2.30194e-06
												0.120137	-4.625e-06
												0.120268	-1.36537e-05
												0.120351	-2.41688e-05
												0.12038	-3.54539e-05
