# Supplementary material for: Exploring a link between the Middle Eocene Climatic Optimum and Neotethys continental arc flare-up
Source: Copernicus journal article supplement (doi:10.5194/cp-17-229-2021), 2021-01-18
Supplement: Supplementary file 9 [file S18_VU101B-A7a.xls]

## Sheet: Summary Table
	Relative Abundances			36Ar [fA]	%1s	37Ar [fA]	%1s	38Ar [fA]	%1s	39Ar [fA]	%1s	40Ar [fA]	%1s	40(r)/39(k)	± 2s	Age	± 2s	40Ar(r)	39Ar(k)	K/Ca	± 2s		Procedure Blanks		36Ar [fA]	1s	37Ar [fA]	1s	38Ar [fA]	1s	39Ar [fA]	1s	40Ar [fA]	1s		Sample Parameters		Sample	Material	Location	Analyst	Standard	%1s	J	%1s	MDF	%1s	Volume Ratio	Sensitivity
																(Ma)		(%)	(%)																							(in Ma)							(mol/volt)
	40_VU101C-A7	0	4	0.00726342	3.72356	1.36166	1.17413	0.00450378	3.89685	0.25946	5.40699	4.21905	0.447197	8.34517	1.10998	46.227	6.07161	51.1392	20.1012	0.081646	0.00906553		40_VU101C-A7	0	0.0138234	0.0001808	0.0089861	0.0001336	0.0073381	8.8e-05	-0.0478302	0.0080681	4.15863	0.0146115		40_VU101C-A7	0	VU101C-A7_40	feldspar	Sl01	K. Kuiper	28.201	0.08	0.003063	0.1	0.983102	0.3	1	1e-13
	41_VU101C-A7	0	4	0.00317117	9.55773	1.70461	1.04961	0.00324774	5.24868	0.227084	5.17149	2.59548	0.856385	7.89099	1.16342	43.7409	6.37255	68.691	17.5661	0.0569942	0.00604443		41_VU101C-A7	0	0.0138234	0.0001808	0.0089861	0.0001336	0.0073381	8.8e-05	-0.0478302	0.0080681	4.15863	0.0146115		41_VU101C-A7	0	VU101C-A7_41	feldspar	Sl01	K. Kuiper	28.201	0.08	0.003063	0.1	0.983102	0.3	1	1e-13
	43_VU101C-A7	0	4	0.00790674	3.16098	2.37495	1.06021	0.00544457	3.21225	0.322779	4.23787	4.62762	0.334555	7.64029	0.805692	42.3672	4.41644	53.0275	24.9711	0.0581517	0.00510449		43_VU101C-A7	0	0.0139804	0.0001299	0.0091298	0.0001182	0.0071535	0.0001156	-0.0596865	0.0059322	4.12473	0.0081531		43_VU101C-A7	0	VU101C-A7_43	feldspar	Sl01	K. Kuiper	28.201	0.08	0.003063	0.1	0.983102	0.3	1	1e-13
	44_VU101C-A7	0	4	0.00454651	4.74899	1.43021	1.11173	0.00359974	5.28207	0.240721	4.84205	3.07805	0.504899	7.64589	0.926759	42.398	5.07999	59.5561	18.6407	0.0720846	0.0071897		44_VU101C-A7	0	0.0139804	0.0001299	0.0091298	0.0001182	0.0071535	0.0001156	-0.0596865	0.0059322	4.12473	0.0081531		44_VU101C-A7	0	VU101C-A7_44	feldspar	Sl01	K. Kuiper	28.201	0.08	0.003063	0.1	0.983102	0.3	1	1e-13
	45_VU101C-A7	0	4	0.00663285	4.66085	1.52703	1.12619	0.00394531	4.50602	0.241816	5.59186	3.5511	0.371599	7.02256	1.10557	38.978	6.07145	47.6177	18.7208	0.0678043	0.00776703		45_VU101C-A7	0	0.0139804	0.0001299	0.0091298	0.0001182	0.0071535	0.0001156	-0.0596865	0.0059322	4.12473	0.0081531		45_VU101C-A7	0	VU101C-A7_45	feldspar	Sl01	K. Kuiper	28.201	0.08	0.003063	0.1	0.983102	0.3	1	1e-13
			S	0.0295207	2.05958	8.39845	0.49928	0.0207411	1.91769	1.29186	2.24421	18.0713	0.214701
	Information on Analysis and Constants Used in Calculations									Results		40(a)/36(a)	± 2s	40(r)/39(k)	± 2s	Age	± 2s	MSWD	39Ar(k)	K/Ca	± 2s
																(Ma)			(%,n)
	Sample = VU101C-A7_40				Age Equations = Min et al. (2000)					Age Plateau				7.69123	0.443967	42.6465	2.43472	0.748768	100	0.0641578	0.00835483
	Material = feldspar				Negative Intensities = Allowed										0.0577237		0.0570907	0.55865	5
	Location = Sl01				Decay Constant 40K = 5.460 ± 0.053 E-10 1/a					Full External Error							2.59063	2.41421	2σ Confidence Limit
	Analyst = K. Kuiper				Decay Constant 39Ar = 2.940 ± 0.016 E-07 1/h					Analytical Error							2.43326	1	Error Magnification
	Project = VU101				Decay Constant 37Ar = 8.230 ± 0.012 E-04 1/h
	Mass Discrimination Law = LIN				Decay Constant 36Cl = 2.257 ± 0.015 E-06 1/a					Total Fusion Age				7.71142	0.451932	42.7571	2.4782		5	0.0658537	0.00304074
	Irradiation = VU101				Decay Activity 40K(EC,β⁺) = 3.310 ± 0.030 1/gs										0.0586055		0.05796
	J = 0.00306300 ± 0.00000306				Decay Activity 40K(β⁻) = 27.890 ± 0.150 1/gs					Full External Error							2.63231
	FCs = 28.201 ± 0.023 Ma				Atmospheric Ratio 40/36(a) = 298.56 ± 0.31					Analytical Error							2.47676
	IGSN = Undefined				Atmospheric Ratio 38/36(a) = 0.1885 ± 0.0003
	Preferred Age = Undefined				Production Ratio 39/37(ca) = 0.000673 ± 0.000004					Normal Isochron		289.033	89.5651	7.90378	1.93947	43.811	10.6233	0.995359	100
	Classification = Undefined				Production Ratio 36/37(ca) = 0.000264 ± 0.000002								0.309878		0.245386		0.24248	0.393777	5
	Experiment Type = Undefined				Production Ratio 40/39(k) = 0.000860 ± 0.000070					Full External Error							10.6621	2.63299	2σ Confidence Limit
	Extraction Method = Undefined				Production Ratio 38/39(k) = 0.012110 ± 0.000030					Analytical Error							10.6229	1	Error Magnification
	Heating = 45 sec				Production Ratio 36/38(cl) = 262.80 ± 1.71												22		Number of Iterations
	Isolation = 5.00 min				Scaling Ratio K/Ca = 0.430												6.04351e-05		Convergence
	Instrument = HELIX-MC				Abundance Ratio 40K/K = 1.1700 ± 0.0100 E-04
	Lithology = Undefined				Atomic Weight K = 39.0983 ± 0.0001 g					Inverse Isochron		293.5	85.4972	7.83204	1.89687	43.418	10.3922	0.994768	100
	Lat-Lon = Undefined - Undefined												0.291302		0.242194		0.239352	0.394052	5
	Feature = Undefined									Full External Error							10.4312	2.63299	2σ Confidence Limit
										Analytical Error							10.3918	1	Error Magnification
																	5		Number of Iterations
																	0.000269827		Convergence
																	0.20186		Spreading Factor
[truncated: 39 more columns]

## Sheet: Hidden Data
Double Line Plot Age Plateau			Double Line Plot K/Ca Plateau			X-Y Plot Normal Isochron		X-Y Plot Inverse Isochron		Error Ellipses Normal Isochron		Error Ellipses Inverse Isochron
Ar39k%	Line 1	Line 2	Ar39k%	Line 1	Line 2	X-axis	Y-axis	X-axis	Y-axis	X-axis	Y-axis	X-axis	Y-axis
0	40.1554	52.2986	0	0.0725805	0.0907115	37.4488	611.076	0.0612833	0.00163646			0.0679565	0.00163766
20.1012	40.1554	52.2986	20.1012	0.0725805	0.0907115	83.0298	953.747	0.0870564	0.0010485			0.0677291	0.00160422
20.1012	50.1135	37.3684	20.1012	0.0630386	0.0509498	44.1199	635.649	0.0694092	0.0015732			0.0670625	0.00157297
37.6673	50.1135	37.3684	37.6673	0.0630386	0.0509498	57.5107	738.281	0.0778982	0.0013545			0.066002	0.00154605
37.6673	37.9508	46.7837	37.6673	0.0530472	0.0632562	38.6516	569.993	0.0678107	0.00175441			0.0646199	0.00152529
62.6384	37.9508	46.7837	62.6384	0.0530472	0.0632562							0.0630105	0.0015121
62.6384	47.4779	37.318	62.6384	0.0792743	0.0648949							0.0612833	0.00150739
81.2792	47.4779	37.318	81.2792	0.0792743	0.0648949							0.0595562	0.00151148
81.2792	32.9065	45.0494	81.2792	0.0600372	0.0755713							0.0579467	0.00152408
100	32.9065	45.0494	100	0.0600372	0.0755713							0.0565647	0.00154435
												0.0555042	0.00157088
												0.0548375	0.00160189
												0.0546101	0.00163525
												0.0548375	0.0016687
												0.0555041	0.00169995
												0.0565646	0.00172687
												0.0579467	0.00174763
												0.0595561	0.00176081
												0.0612833	0.00176552
												0.0630104	0.00176143
												0.0646199	0.00174883
												0.066002	0.00172857
												0.0670625	0.00170203
												0.0677291	0.00167102
												0.0679565	0.00163766
												0.0962284	0.00105142
												0.0959159	0.000990682
												0.0949996	0.000933886
												0.093542	0.000884901
												0.0916425	0.000847064
												0.0894304	0.000822955
												0.0870565	0.000814216
												0.0846826	0.000821442
												0.0824705	0.000844142
												0.0805709	0.000880769
												0.0791133	0.000928826
												0.078197	0.000985038
												0.0778844	0.00104557
												0.0781969	0.00110631
												0.0791132	0.00116311
												0.0805708	0.00121209
												0.0824703	0.00124993
												0.0846824	0.00127404
												0.0870563	0.00128278
												0.0894302	0.00127555
												0.0916423	0.00125285
												0.0935419	0.00121622
												0.0949995	0.00116817
												0.0959158	0.00111196
												0.0962284	0.00105142
												0.0753397	0.00157402
												0.0751376	0.00154589
												0.0745452	0.00151962
												0.0736027	0.001497
												0.0723745	0.00147957
												0.0709442	0.00146853
												0.0694093	0.00146461
												0.0678743	0.0014681
												0.066444	0.00147875
												0.0652158	0.00149583
												0.0642733	0.00151819
												0.0636809	0.0015443
												0.0634788	0.00157237
												0.0636809	0.0016005
												0.0642733	0.00162677
												0.0652158	0.00164939
												0.066444	0.00166682
												0.0678743	0.00167787
												0.0694092	0.00168178
												0.0709441	0.00167829
												0.0723744	0.00166764
												0.0736027	0.00165056
												0.0745451	0.0016282
												0.0751376	0.0016021
												0.0753397	0.00157402
												0.085513	0.00135591
												0.0852535	0.00131937
												0.0844928	0.00128522
												0.0832827	0.0012558
												0.0817056	0.0012331
												0.0798691	0.00121867
												0.0778982	0.0012135
												0.0759274	0.00121794
												0.0740908	0.00123169
												0.0725138	0.0012538
												0.0713036	0.00128278
												0.0705429	0.00131664
												0.0702834	0.00135308
												0.0705429	0.00138962
												0.0713036	0.00142377
												0.0725137	0.0014532
												0.0740908	0.0014759
												0.0759273	0.00149032
												0.0778982	0.00149549
												0.079869	0.00149105
												0.0817055	0.00147731
												0.0832826	0.0014552
												0.0844928	0.00142622
												0.0852535	0.00139236
												0.085513	0.00135591
												0.0754434	0.00175527
												0.0751834	0.00171004
												0.0744209	0.00166784
												0.0732079	0.00163153
												0.0716271	0.0016036
												0.0697862	0.00158595
												0.0678107	0.00157977
												0.0658352	0.0015855
												0.0639943	0.00160274
												0.0624135	0.00163031
												0.0612005	0.00166634
												0.060438	0.00170838
												0.0601779	0.00175355
												0.060438	0.00179877
												0.0612005	0.00184098
												0.0624135	0.00187728
												0.0639943	0.00190521
												0.0658351	0.00192287
												0.0678106	0.00192904
												0.0697861	0.00192331
												0.071627	0.00190607
												0.0732078	0.0018785
												0.0744208	0.00184247
												0.0751834	0.00180044
												0.0754434	0.00175527
