# Supplementary material for: Exploring a link between the Middle Eocene Climatic Optimum and Neotethys continental arc flare-up
Source: Copernicus journal article supplement (doi:10.5194/cp-17-229-2021), 2021-01-18
Supplement: Supplementary file 10 [file S19_VU101B-A7e.xls]

## Sheet: Summary Table
	Relative Abundances			36Ar [fA]	%1s	37Ar [fA]	%1s	38Ar [fA]	%1s	39Ar [fA]	%1s	40Ar [fA]	%1s	40(r)/39(k)	± 2s	Age	± 2s	40Ar(r)	39Ar(k)	K/Ca	± 2s		Procedure Blanks		36Ar [fA]	1s	37Ar [fA]	1s	38Ar [fA]	1s	39Ar [fA]	1s	40Ar [fA]	1s		Sample Parameters		Sample	Material	Location	Analyst	Standard	%1s	J	%1s	MDF	%1s	Volume Ratio	Sensitivity
																(Ma)		(%)	(%)																							(in Ma)							(mol/volt)
	103_VU101B-A7	0		0.0471687	0.87711	10.036	1.29801	0.0278143	1.0475	1.64224	0.425786	24.7361	0.0410348	6.99668	0.164415	38.8358	0.902988	46.2603	10.1337	0.070074	0.00191529		103_VU101B-A7	0	0.0127521	0.0001595	0.0082036	8.41e-05	0.0046866	0.0001162	-0.0103615	0.003728	3.44812	0.0040112		103_VU101B-A7	0	103_VU101B-A7	feldspar	Sl01	Klaudia Kuiper	28.201	0.08	0.003063	0.1	0.973769	0.1	1	1e-13
	105_VU101B-A7	0	4	0.0383372	1.06217	9.92308	1.35603	0.0228276	1.63133	1.42287	0.530676	20.7327	0.0494201	7.10893	0.189619	39.4523	1.04106	48.5592	8.77491	0.0613684	0.0017884		105_VU101B-A7	0	0.0127521	0.0001595	0.0082036	8.41e-05	0.0046866	0.0001162	-0.0103615	0.003728	3.44812	0.0040112		105_VU101B-A7	0	105_VU101B-A7	feldspar	Sl01	Klaudia Kuiper	28.201	0.08	0.003063	0.1	0.973769	0.1	1	1e-13
	099_VU101B-A7	0	4	0.0348128	1.09238	6.77119	1.48301	0.0177252	1.17794	1.01508	0.548612	17.0965	0.0580815	7.16026	0.240445	39.734	1.31991	42.3223	6.26134	0.0641728	0.00203057		099_VU101B-A7	0	0.0134643	7.74e-05	0.008478	0.0001029	0.0051806	8.68e-05	-0.0122494	0.0040277	3.42471	0.0052335		099_VU101B-A7	0	099_VU101B-A7	feldspar	Sl01	Klaudia Kuiper	28.201	0.08	0.003063	0.1	0.973769	0.1	1	1e-13
	100_VU101B-A7	0	4	0.0272335	1.09074	7.4015	1.62808	0.017915	1.41264	1.16315	0.594559	16.0168	0.0712638	7.31191	0.178784	40.5663	0.980981	52.8719	7.17615	0.0672852	0.00233364		100_VU101B-A7	0	0.0134643	7.74e-05	0.008478	0.0001029	0.0051806	8.68e-05	-0.0122494	0.0040277	3.42471	0.0052335		100_VU101B-A7	0	100_VU101B-A7	feldspar	Sl01	Klaudia Kuiper	28.201	0.08	0.003063	0.1	0.973769	0.1	1	1e-13
	104_VU101B-A7	0	4	0.041493	0.919765	11.2634	1.05425	0.0266871	1.04509	1.62665	0.352384	23.4649	0.0438305	7.38888	0.152023	40.9886	0.833951	50.983	10.032	0.061811	0.00137483		104_VU101B-A7	0	0.0127521	0.0001595	0.0082036	8.41e-05	0.0046866	0.0001162	-0.0103615	0.003728	3.44812	0.0040112		104_VU101B-A7	0	104_VU101B-A7	feldspar	Sl01	Klaudia Kuiper	28.201	0.08	0.003063	0.1	0.973769	0.1	1	1e-13
	092_VU101B-A7	0	4	0.036304	1.14967	10.2146	1.49876	0.0222264	0.98934	1.41328	0.450228	20.4768	0.053348	7.42446	0.191641	41.1838	1.05117	50.9932	8.71427	0.0592052	0.00185381		092_VU101B-A7	0	0.0143316	0.0001557	0.0090375	0.0001741	0.0058578	9.82e-05	-0.0036825	0.0037498	3.53457	0.0062069		092_VU101B-A7	0	092_VU101B-A7	feldspar	Sl01	Klaudia Kuiper	28.201	0.08	0.003063	0.1	0.973769	0.1	1	1e-13
	101_VU101B-A7	0	4	0.0454468	0.879265	10.736	1.10915	0.0288563	1.21669	1.78389	0.484047	26.2405	0.0409701	7.60782	0.154994	42.1892	0.84969	51.5103	11.0084	0.0711591	0.00172344		101_VU101B-A7	0	0.0134643	7.74e-05	0.008478	0.0001029	0.0051806	8.68e-05	-0.0122494	0.0040277	3.42471	0.0052335		101_VU101B-A7	0	101_VU101B-A7	feldspar	Sl01	Klaudia Kuiper	28.201	0.08	0.003063	0.1	0.973769	0.1	1	1e-13
	093_VU101B-A7	0	4	0.0247478	1.41762	9.27847	1.4541	0.0217036	1.15279	1.49335	0.51172	17.9972	0.0557227	7.62458	0.162783	42.2811	0.892347	63.0017	9.21427	0.068918	0.00212577		093_VU101B-A7	0	0.0143316	0.0001557	0.0090375	0.0001741	0.0058578	9.82e-05	-0.0036825	0.0037498	3.53457	0.0062069		093_VU101B-A7	0	093_VU101B-A7	feldspar	Sl01	Klaudia Kuiper	28.201	0.08	0.003063	0.1	0.973769	0.1	1	1e-13
	091_VU101B-A7	0	4	0.0356336	1.47073	12.8874	1.27472	0.027256	1.05199	1.85343	0.343485	23.7677	0.0491428	7.66668	0.179171	42.5119	0.982056	59.5057	11.4303	0.0615518	0.00162574		091_VU101B-A7	0	0.0143316	0.0001557	0.0090375	0.0001741	0.0058578	9.82e-05	-0.0036825	0.0037498	3.53457	0.0062069		091_VU101B-A7	0	091_VU101B-A7	feldspar	Sl01	Klaudia Kuiper	28.201	0.08	0.003063	0.1	0.973769	0.1	1	1e-13
	089_VU101B-A7	0		0.0516195	1.13729	9.16452	1.19237	0.0405748	0.656778	2.79091	0.240581	39.7446	0.0496404	8.99651	0.134532	49.7864	0.734464	63.035	17.2546	0.130661	0.00317899		089_VU101B-A7	0	0.0138727	0.0001358	0.00881	0.0001042	0.0056576	0.0001127	-0.0125549	0.0027907	3.55376	0.0051085		089_VU101B-A7	0	089_VU101B-A7	feldspar	Sl01	Klaudia Kuiper	28.201	0.08	0.003063	0.1	0.973769	0.1	1	1e-13
			S	0.382797	0.349679	97.6761	0.42029	0.253586	0.351925	16.2048	0.134729	230.274	0.016271
	Information on Analysis and Constants Used in Calculations									Results		40(a)/36(a)	± 2s	40(r)/39(k)	± 2s	Age	± 2s	MSWD	39Ar(k)	K/Ca	± 2s
																(Ma)			(%,n)
	Sample = 103_VU101B-A7				Age Equations = Min et al. (2000)					Age Plateau Error Mean				7.44126	0.142079	41.2759	0.78354	5.19612	72.6117	0.0639364	0.00295948
	Material = feldspar				Negative Intensities = Allowed										0.0190934		0.018983	6.1644e-06	8
	Location = Sl01				Decay Constant 40K = 5.460 ± 0.053 E-10 1/a					Full External Error							1.16118	2.06904	2σ Confidence Limit
	Analyst = Klaudia Kuiper				Decay Constant 39Ar = 2.940 ± 0.016 E-07 1/h					Analytical Error							0.779276	2.2795	Error Magnification
	Project = VU101				Decay Constant 37Ar = 8.230 ± 0.012 E-04 1/h
	Mass Discrimination Law = LIN				Decay Constant 36Cl = 2.257 ± 0.015 E-06 1/a					Total Fusion Age				7.66279	0.0542573	42.4906	0.30903		10	0.0710493	0.000627406
	Irradiation = VU101				Decay Activity 40K(EC,β⁺) = 3.310 ± 0.030 1/gs										0.00708061		0.00727291
	J = 0.00306300 ± 0.00000306				Decay Activity 40K(β⁻) = 27.890 ± 0.150 1/gs					Full External Error							0.934542
	FCs = 28.201 ± 0.023 Ma				Atmospheric Ratio 40/36(a) = 298.56 ± 0.31					Analytical Error							0.297394
	IGSN = Undefined				Atmospheric Ratio 38/36(a) = 0.1885 ± 0.0003
	Preferred Age = Undefined				Production Ratio 39/37(ca) = 0.000673 ± 0.000004					Normal Isochron Error Chron		270.157	24.2367	8.0702	0.551491	44.7223	3.02043	3.45532	72.6117
	Classification = Undefined				Production Ratio 36/37(ca) = 0.000264 ± 0.000002								0.0897132		0.0683367		0.0675375	0.00204954	8
	Experiment Type = Undefined				Production Ratio 40/39(k) = 0.000860 ± 0.000070					Full External Error							3.15973	2.1547	2σ Confidence Limit
	Extraction Method = Undefined				Production Ratio 38/39(k) = 0.012110 ± 0.000030					Analytical Error							3.01914	1.85885	Error Magnification
	Heating = 45 sec				Production Ratio 36/38(cl) = 262.80 ± 1.71												21		Number of Iterations
	Isolation = 5.00 min				Scaling Ratio K/Ca = 0.430												6.37917e-05		Convergence
	Instrument = HELIX				Abundance Ratio 40K/K = 1.1700 ± 0.0100 E-04
	Lithology = Undefined				Atomic Weight K = 39.0983 ± 0.0001 g					Inverse Isochron Error Chron		270.526	24.1891	8.06816	0.545383	44.7111	2.98703	3.43883	72.6117
	Lat-Lon = Undefined - Undefined												0.0894149		0.067597		0.0668073	0.00213488	8
	Feature = Undefined									Full External Error							3.12775	2.1547	2σ Confidence Limit
										Analytical Error							2.98572	1.85441	Error Magnification
																	3		Number of Iterations
																	0.00028974		Convergence
																	0.189805		Spreading Factor
[truncated: 39 more columns]

## Sheet: Hidden Data
Double Line Plot Age Plateau			Double Line Plot K/Ca Plateau			X-Y Plot Normal Isochron		X-Y Plot Inverse Isochron		Error Ellipses Normal Isochron		Error Ellipses Inverse Isochron
Ar39k%	Line 1	Line 2	Ar39k%	Line 1	Line 2	X-axis	Y-axis	X-axis	Y-axis	X-axis	Y-axis	X-axis	Y-axis
0	37.9329	39.7388	0	0.0681587	0.0719893	36.7366	555.594	0.0661213	0.00179987			0.0666894	0.00180002
10.1337	37.9329	39.7388	10.1337	0.0681587	0.0719893	39.6498	580.428	0.0683114	0.00172287			0.06667	0.00179131
10.1337	40.4933	38.4112	10.1337	0.0631568	0.05958	30.5986	517.654	0.0591102	0.00193179			0.0666133	0.00178318
18.9086	40.4933	38.4112	18.9086	0.0631568	0.05958	45.8145	633.552	0.0723138	0.0015784			0.066523	0.0017762
18.9086	38.4141	41.0539	18.9086	0.0621422	0.0662033	42.0325	609.133	0.0690038	0.00164168			0.0664054	0.00177082
25.1699	38.4141	41.0539	25.1699	0.0621422	0.0662033	41.8481	609.259	0.0686868	0.00164134			0.0662684	0.00176743
25.1699	41.5473	39.5853	25.1699	0.0696188	0.0649516	41.6935	615.757	0.067711	0.00162402			0.0661213	0.00176625
32.3461	41.5473	39.5853	32.3461	0.0696188	0.0649516	66.6913	807.053	0.0826356	0.00123908			0.0659743	0.00176736
32.3461	40.1546	41.8225	32.3461	0.0604362	0.0631859	57.2348	737.361	0.0776212	0.00135619			0.0658373	0.00177068
42.3781	40.1546	41.8225	42.3781	0.0604362	0.0631859	56.6004	807.766	0.0700703	0.00123798			0.0657197	0.001776
42.3781	42.2349	40.1326	42.3781	0.061059	0.0573514							0.0656294	0.00178294
51.0923	42.2349	40.1326	51.0923	0.061059	0.0573514							0.0655726	0.00179103
51.0923	41.3395	43.0389	51.0923	0.0694357	0.0728825							0.0655533	0.00179973
62.1008	41.3395	43.0389	62.1008	0.0694357	0.0728825							0.0655726	0.00180844
62.1008	43.1735	41.3888	62.1008	0.0710438	0.0667922							0.0656294	0.00181657
71.315	43.1735	41.3888	71.315	0.0710438	0.0667922							0.0657196	0.00182355
71.315	41.5298	43.4939	71.315	0.0599261	0.0631775							0.0658373	0.00182893
82.7454	41.5298	43.4939	82.7454	0.0599261	0.0631775							0.0659743	0.00183232
82.7454	50.5208	49.0519	82.7454	0.13384	0.127482							0.0661213	0.0018335
100	50.5208	49.0519	100	0.13384	0.127482							0.0662683	0.00183239
												0.0664053	0.00182907
												0.066523	0.00182375
												0.0666133	0.00181681
												0.06667	0.00180871
												0.0666894	0.00180002
												0.069043	0.00172302
												0.0690181	0.0017128
												0.068945	0.00170325
												0.0688287	0.00169505
												0.0686772	0.00168874
												0.0685007	0.00168475
												0.0683114	0.00168336
												0.068122	0.00168467
												0.0679456	0.00168858
												0.067794	0.00169482
												0.0676778	0.00170298
												0.0676047	0.00171249
												0.0675798	0.00172271
												0.0676047	0.00173294
												0.0676778	0.00174248
												0.067794	0.00175069
												0.0679456	0.001757
												0.068122	0.00176098
												0.0683114	0.00176237
												0.0685007	0.00176106
												0.0686772	0.00175716
												0.0688287	0.00175091
												0.068945	0.00174275
												0.0690181	0.00173324
												0.069043	0.00172302
												0.0597653	0.00193203
												0.059743	0.00192046
												0.0596776	0.00190966
												0.0595735	0.00190037
												0.0594378	0.00189322
												0.0592798	0.0018887
												0.0591102	0.00188712
												0.0589406	0.00188858
												0.0587826	0.00189299
												0.0586469	0.00190004
												0.0585428	0.00190925
												0.0584773	0.00192
												0.058455	0.00193156
												0.0584773	0.00194313
												0.0585428	0.00195392
												0.0586469	0.00196321
												0.0587826	0.00197036
												0.0589406	0.00197488
												0.0591102	0.00197647
												0.0592797	0.001975
												0.0594377	0.0019706
												0.0595734	0.00196355
												0.0596775	0.00195433
												0.059743	0.00194358
												0.0597653	0.00193203
												0.0731836	0.00157867
												0.073154	0.00156898
												0.0730671	0.00155993
												0.0729289	0.00155214
												0.0727487	0.00154614
												0.072539	0.00154234
												0.0723138	0.001541
												0.0720887	0.0015422
												0.0718789	0.00154588
												0.0716988	0.00155176
												0.0715606	0.00155947
												0.0714737	0.00156846
												0.071444	0.00157814
												0.0714737	0.00158783
												0.0715606	0.00159687
												0.0716988	0.00160466
												0.0718789	0.00161066
												0.0720887	0.00161447
												0.0723138	0.00161581
												0.0725389	0.0016146
												0.0727487	0.00161093
												0.0729289	0.00160504
												0.0730671	0.00159734
												0.073154	0.00158834
												0.0731836	0.00157867
												0.0694962	0.00164186
												0.0694794	0.00163338
												0.0694302	0.00162548
												0.069352	0.00161867
												0.06925	0.00161344
												0.0691313	0.00161013
												0.0690038	0.00160897
												0.0688764	0.00161004
												0.0687576	0.00161326
												0.0686557	0.00161842
												0.0685774	0.00162517
												0.0685282	0.00163304
												0.0685114	0.0016415
												0.0685282	0.00164997
												0.0685774	0.00165788
												0.0686556	0.00166468
												0.0687576	0.00166992
												0.0688764	0.00167323
												0.0690038	0.00167439
												0.0691312	0.00167332
												0.06925	0.0016701
												0.069352	0.00166493
												0.0694302	0.00165819
												0.0694794	0.00165032
												0.0694962	0.00164186
												0.0693127	0.00164154
												0.0692914	0.00163092
												0.0692289	0.001621
												0.0691294	0.00161247
												0.0689998	0.00160591
												0.0688488	0.00160176
												0.0686868	0.00160031
												0.0685248	0.00160165
												0.0683739	0.0016057
												0.0682442	0.00161218
												0.0681448	0.00162064
												0.0680822	0.00163052
												0.0680609	0.00164113
												0.0680822	0.00165176
												0.0681447	0.00166167
												0.0682442	0.0016702
												0.0683738	0.00167677
												0.0685248	0.00168092
												0.0686868	0.00168237
												0.0688488	0.00168102
												0.0689998	0.00167697
												0.0691294	0.0016705
												0.0692289	0.00166203
												0.0692914	0.00165216
												0.0693127	0.00164154
												0.0683716	0.00162413
												0.0683491	0.0016162
												0.0682831	0.00160881
												0.0681781	0.00160245
												0.0680413	0.00159756
												0.067882	0.00159448
												0.0677111	0.00159341
												0.0675401	0.00159442
												0.0673808	0.00159745
												0.067244	0.00160229
												0.067139	0.00160861
												0.067073	0.00161599
												0.0670505	0.00162391
												0.067073	0.00163183
												0.067139	0.00163923
												0.067244	0.00164559
												0.0673808	0.00165047
												0.0675401	0.00165356
												0.067711	0.00165463
												0.067882	0.00165362
												0.0680413	0.00165059
												0.0681781	0.00164574
												0.0682831	0.00163942
												0.0683491	0.00163205
												0.0683716	0.00162413
												0.0834899	0.00123922
												0.0834608	0.00122906
												0.0833755	0.00121958
												0.0832397	0.00121142
												0.0830628	0.00120516
												0.0828567	0.0012012
												0.0826356	0.00119982
												0.0824145	0.00120112
												0.0822084	0.00120501
												0.0820315	0.00121121
												0.0818957	0.00121932
												0.0818104	0.00122877
												0.0817813	0.00123893
												0.0818104	0.00124909
												0.0818957	0.00125857
												0.0820315	0.00126673
												0.0822084	0.001273
												0.0824145	0.00127695
												0.0826356	0.00127833
												0.0828567	0.00127703
												0.0830628	0.00127314
												0.0832397	0.00126694
												0.0833755	0.00125883
												0.0834608	0.00124938
												0.0834899	0.00123922
												0.0781624	0.00135638
												0.078144	0.0013449
												0.0780899	0.0013342
												0.0780039	0.00132499
												0.0778918	0.00131791
												0.0777613	0.00131344
												0.0776212	0.00131188
												0.0774811	0.00131334
												0.0773506	0.00131772
												0.0772385	0.00132472
												0.0771524	0.00133387
												0.0770984	0.00134454
												0.0770799	0.001356
												0.0770984	0.00136747
												0.0771524	0.00137818
												0.0772384	0.00138739
												0.0773505	0.00139447
												0.0774811	0.00139894
												0.0776211	0.0014005
												0.0777612	0.00139904
												0.0778918	0.00139466
												0.0780039	0.00138766
												0.0780899	0.00137851
												0.078144	0.00136784
												0.0781624	0.00135638
												0.0704153	0.00123823
												0.0704036	0.00123056
												0.0703691	0.00122339
												0.0703143	0.00121722
												0.0702428	0.00121246
												0.0701596	0.00120944
												0.0700703	0.00120837
												0.069981	0.00120931
												0.0698978	0.00121221
												0.0698264	0.00121687
												0.0697715	0.00122296
												0.0697371	0.00123008
												0.0697253	0.00123773
												0.0697371	0.00124541
												0.0697715	0.00125257
												0.0698263	0.00125875
												0.0698978	0.0012635
												0.069981	0.00126652
												0.0700703	0.0012676
												0.0701596	0.00126665
												0.0702428	0.00126375
												0.0703143	0.0012591
												0.0703691	0.00125301
												0.0704036	0.00124589
												0.0704153	0.00123823
