# Supplementary material for: Exploring a link between the Middle Eocene Climatic Optimum and Neotethys continental arc flare-up
Source: Copernicus journal article supplement (doi:10.5194/cp-17-229-2021), 2021-01-18
Supplement: Supplementary file 11 [file S20_VU101B-A8a.xls]

## Sheet: Summary Table
	Relative Abundances			36Ar [fA]	%1s	37Ar [fA]	%1s	38Ar [fA]	%1s	39Ar [fA]	%1s	40Ar [fA]	%1s	40(r)/39(k)	± 2s	Age	± 2s	40Ar(r)	39Ar(k)	K/Ca	± 2s		Procedure Blanks		36Ar [fA]	1s	37Ar [fA]	1s	38Ar [fA]	1s	39Ar [fA]	1s	40Ar [fA]	1s		Sample Parameters		Sample	Material	Location	Analyst	Standard	%1s	J	%1s	MDF	%1s	Volume Ratio	Sensitivity
																(Ma)		(%)	(%)																							(in Ma)							(mol/volt)
	72_VU101B-A8	0	4	0.00311197	8.66325	0.0253892	9.27548	0.0654833	0.789415	4.68585	0.426397	38.4387	0.0669574	8.00456	0.0772071	44.8136	0.426996	97.579	29.9341	79.361	14.7378		72_VU101B-A8	0	0.0141217	0.0001619	0.0091853	9.97e-05	0.0071194	6.64e-05	-0.0505265	0.0090208	4.21687	0.0096135		72_VU101B-A8	0	VU101B-A8_72	biotite	X1	K. Kuiper	28.201	0.08	0.0030945	0.1	0.983102	0.3	1	1e-13
	73_VU101B-A8	0	4	0.00266543	10.4078	0.043753	6.47053	0.0351189	0.95191	2.51523	0.575301	20.8186	0.103258	7.96131	0.114111	44.5744	0.631178	96.1849	16.0676	24.7192	3.21155		73_VU101B-A8	0	0.0141217	0.0001619	0.0091853	9.97e-05	0.0071194	6.64e-05	-0.0505265	0.0090208	4.21687	0.0096135		73_VU101B-A8	0	VU101B-A8_73	biotite	X1	K. Kuiper	28.201	0.08	0.0030945	0.1	0.983102	0.3	1	1e-13
	75_VU101B-A8	0	4	0.000872712	27.1493	0.00126899	180.366	0.0225206	1.36291	1.66025	0.781301	13.6621	0.108634	8.07129	0.153259	45.1826	0.847431	98.0842	10.606	562.583	2029.44		75_VU101B-A8	0	0.0139467	0.0001578	0.0092082	0.0001179	0.0073651	0.0001108	-0.0481836	0.0068743	4.15391	0.0100093		75_VU101B-A8	0	VU101B-A8_75	biotite	X1	K. Kuiper	28.201	0.08	0.0030945	0.1	0.983102	0.3	1	1e-13
	76_VU101B-A8	0	4	0.0029227	7.65363	0.0323881	8.41069	0.0525678	0.897505	3.77954	0.437276	30.998	0.083557	7.97062	0.0793489	44.6259	0.438886	97.184	24.1443	50.1787	8.45215		76_VU101B-A8	0	0.0139467	0.0001578	0.0092082	0.0001179	0.0073651	0.0001108	-0.0481836	0.0068743	4.15391	0.0100093		76_VU101B-A8	0	VU101B-A8_76	biotite	X1	K. Kuiper	28.201	0.08	0.0030945	0.1	0.983102	0.3	1	1e-13
	77_VU101B-A8	0	4	0.00272945	9.47193	0.0327353	8.51867	0.0418725	0.917795	3.01306	0.490374	25.1305	0.0888067	8.07023	0.0954436	45.1768	0.527749	96.7585	19.2479	39.5782	6.75424		77_VU101B-A8	0	0.0139467	0.0001578	0.0092082	0.0001179	0.0073651	0.0001108	-0.0481836	0.0068743	4.15391	0.0100093		77_VU101B-A8	0	VU101B-A8_77	biotite	X1	K. Kuiper	28.201	0.08	0.0030945	0.1	0.983102	0.3	1	1e-13
			S	0.0123023	4.61727	0.135534	4.30196	0.217563	0.422134	15.6539	0.227504	129.048	0.0388517
	Information on Analysis and Constants Used in Calculations									Results		40(a)/36(a)	± 2s	40(r)/39(k)	± 2s	Age	± 2s	MSWD	39Ar(k)	K/Ca	± 2s
																(Ma)			(%,n)
	Sample = VU101B-A8_72				Age Equations = Min et al. (2000)					Age Plateau				8.00697	0.0424197	44.8269	0.250762	0.986351	100	31.5115	12.4726
	Material = biotite				Negative Intensities = Allowed										0.00529785		0.00559401	0.413445	5
	Location = X1				Decay Constant 40K = 5.460 ± 0.053 E-10 1/a					Full External Error							0.963218	2.41421	2σ Confidence Limit
	Analyst = K. Kuiper				Decay Constant 39Ar = 2.940 ± 0.016 E-07 1/h					Analytical Error							0.234602	1	Error Magnification
	Project = VU101				Decay Constant 37Ar = 8.230 ± 0.012 E-04 1/h
	Mass Discrimination Law = LIN				Decay Constant 36Cl = 2.257 ± 0.015 E-06 1/a					Total Fusion Age				8.00913	0.0428792	44.8389	0.253148		5	49.6638	4.279
	Irradiation = VU101				Decay Activity 40K(EC,β⁺) = 3.310 ± 0.030 1/gs										0.00535379		0.00564573
	J = 0.00309450 ± 0.00000309				Decay Activity 40K(β⁻) = 27.890 ± 0.150 1/gs					Full External Error							0.96408
	FCs = 28.201 ± 0.023 Ma				Atmospheric Ratio 40/36(a) = 298.56 ± 0.31					Analytical Error							0.237142
	IGSN = Undefined				Atmospheric Ratio 38/36(a) = 0.1885 ± 0.0003
	Preferred Age = Undefined				Production Ratio 39/37(ca) = 0.000673 ± 0.000004					Normal Isochron No Convergence		163.537	317.158	8.11357	0.254242	45.4164	1.40849	1.51936	100
	Classification = Undefined				Production Ratio 36/37(ca) = 0.000264 ± 0.000002								1.93936		0.0313354		0.0310128	0.207167	5
	Experiment Type = Undefined				Production Ratio 40/39(k) = 0.000860 ± 0.000070					Full External Error							1.69453	2.63299	2σ Confidence Limit
	Extraction Method = Undefined				Production Ratio 38/39(k) = 0.012110 ± 0.000030					Analytical Error							1.40563	1.23263	Error Magnification
	Heating = 45 sec				Production Ratio 36/38(cl) = 262.80 ± 1.71												100		Number of Iterations
	Isolation = 5.00 min				Scaling Ratio K/Ca = 0.430												0.000181481		Convergence
	Instrument = HELIX-MC				Abundance Ratio 40K/K = 1.1700 ± 0.0100 E-04
	Lithology = Undefined				Atomic Weight K = 39.0983 ± 0.0001 g					Inverse Isochron Clustered Points		317.643	284.786	7.99237	0.261103	44.7462	1.44679	1.31641	100
	Lat-Lon = Undefined - Undefined												0.896559		0.032669		0.0323333	0.267	5
	Feature = Undefined									Full External Error							1.71902	2.63299	2σ Confidence Limit
										Analytical Error							1.44409	1.14735	Error Magnification
																	9		Number of Iterations
																	0.00030572		Convergence
																	0.0162484		Spreading Factor
[truncated: 39 more columns]

## Sheet: Hidden Data
Double Line Plot Age Plateau			Double Line Plot K/Ca Plateau			X-Y Plot Normal Isochron		X-Y Plot Inverse Isochron		Error Ellipses Normal Isochron		Error Ellipses Inverse Isochron
Ar39k%	Line 1	Line 2	Ar39k%	Line 1	Line 2	X-axis	Y-axis	X-axis	Y-axis	X-axis	Y-axis	X-axis	Y-axis
0	44.3866	45.2406	0	64.6232	94.0987	1509.84	12384.2	0.121917	8.07482e-05			0.122969	8.0765e-05
29.9341	44.3866	45.2406	29.9341	64.6232	94.0987	948.064	7846.39	0.120828	0.000127447			0.122934	7.71333e-05
29.9341	45.2056	43.9432	29.9341	27.9307	21.5076	1904.19	15667.8	0.121535	6.38251e-05			0.122828	7.37481e-05
46.0017	45.2056	43.9432	46.0017	27.9307	21.5076	1297.55	10640.8	0.121941	9.39776e-05			0.122661	7.08398e-05
46.0017	44.3352	46.03	46.0017	-1466.86	2592.02	1107.83	9238.99	0.119908	0.000108237			0.122443	6.86068e-05
56.6078	44.3352	46.03	56.6078	-1466.86	2592.02							0.122189	6.72012e-05
56.6078	45.0648	44.187	56.6078	58.6309	41.7266							0.121917	6.67188e-05
80.7521	45.0648	44.187	80.7521	58.6309	41.7266							0.121645	6.71925e-05
80.7521	44.649	45.7045	80.7521	32.824	46.3325							0.121391	6.859e-05
100	44.649	45.7045	100	32.824	46.3325							0.121173	7.08161e-05
												0.121005	7.3719e-05
												0.1209	7.71009e-05
												0.120864	8.07314e-05
												0.1209	8.4363e-05
												0.121005	8.77483e-05
												0.121173	9.06566e-05
												0.121391	9.28896e-05
												0.121645	9.42952e-05
												0.121917	9.47776e-05
												0.122189	9.43039e-05
												0.122443	9.29064e-05
												0.122661	9.06803e-05
												0.122828	8.77774e-05
												0.122934	8.43955e-05
												0.122969	8.0765e-05
												0.122241	0.000127494
												0.122192	0.000120593
												0.122051	0.00011416
												0.121827	0.000108632
												0.121534	0.000104387
												0.121194	0.000101713
												0.120828	0.000100792
												0.120462	0.000101689
												0.120122	0.00010434
												0.119829	0.000108567
												0.119605	0.000114079
												0.119464	0.000120503
												0.119416	0.000127401
												0.119464	0.000134301
												0.119605	0.000140734
												0.119829	0.000146262
												0.120122	0.000150507
												0.120462	0.000153181
												0.120828	0.000154102
												0.121194	0.000153206
												0.121534	0.000150554
												0.121827	0.000146328
												0.122051	0.000140815
												0.122192	0.000134391
												0.122241	0.000127494
												0.123452	6.38442e-05
												0.123387	5.48654e-05
												0.123196	4.64971e-05
												0.122891	3.93098e-05
												0.122494	3.37931e-05
												0.122031	3.0323e-05
												0.121535	2.91361e-05
												0.121039	3.03131e-05
												0.120576	3.3774e-05
												0.120179	3.92827e-05
												0.119875	4.6464e-05
												0.119683	5.48285e-05
												0.119618	6.3806e-05
												0.119683	7.27848e-05
												0.119875	8.11531e-05
												0.120179	8.83404e-05
												0.120576	9.38571e-05
												0.121039	9.73272e-05
												0.121535	9.85141e-05
												0.122031	9.73371e-05
												0.122494	9.38763e-05
												0.122891	8.83675e-05
												0.123196	8.11862e-05
												0.123387	7.28218e-05
												0.123452	6.38443e-05
												0.123026	9.40071e-05
												0.122989	9.027e-05
												0.122881	8.67855e-05
												0.122708	8.37912e-05
												0.122484	8.14911e-05
												0.122222	8.00419e-05
												0.121941	7.95424e-05
												0.12166	8.00267e-05
												0.121398	8.14616e-05
												0.121173	8.37495e-05
												0.121	8.67345e-05
												0.120892	9.0213e-05
												0.120855	9.39481e-05
												0.120892	9.76852e-05
												0.121	0.00010117
												0.121173	0.000104164
												0.121398	0.000106464
												0.12166	0.000107913
												0.121941	0.000108413
												0.122222	0.000107928
												0.122484	0.000106493
												0.122708	0.000104206
												0.122881	0.000101221
												0.122989	9.77421e-05
												0.123026	9.40071e-05
												0.121103	0.000108271
												0.121062	0.000102944
												0.120943	9.79775e-05
												0.120753	9.37102e-05
												0.120506	9.04328e-05
												0.120217	8.83688e-05
												0.119908	8.76587e-05
												0.119599	8.8351e-05
												0.11931	9.03986e-05
												0.119063	9.36617e-05
												0.118873	9.79182e-05
												0.118754	0.000102878
												0.118713	0.000108203
												0.118754	0.00011353
												0.118873	0.000118496
												0.119063	0.000122764
												0.11931	0.000126041
												0.119599	0.000128105
												0.119908	0.000128815
												0.120217	0.000128123
												0.120506	0.000126075
												0.120753	0.000122812
												0.120943	0.000118556
												0.121062	0.000113596
												0.121103	0.000108271
