# Supplementary material for: Exploring a link between the Middle Eocene Climatic Optimum and Neotethys continental arc flare-up
Source: Copernicus journal article supplement (doi:10.5194/cp-17-229-2021), 2021-01-18
Supplement: Supplementary file 12 [file S21_VU101B-A8b.xls]

## Sheet: Summary Table
	Relative Abundances			36Ar [fA]	%1s	37Ar [fA]	%1s	38Ar [fA]	%1s	39Ar [fA]	%1s	40Ar [fA]	%1s	40(r)/39(k)	± 2s	Age	± 2s	40Ar(r)	39Ar(k)	K/Ca	± 2s		Procedure Blanks		36Ar [fA]	1s	37Ar [fA]	1s	38Ar [fA]	1s	39Ar [fA]	1s	40Ar [fA]	1s		Sample Parameters		Sample	Material	Location	Analyst	Standard	%1s	J	%1s	MDF	%1s	Volume Ratio	Sensitivity
																(Ma)		(%)	(%)																							(in Ma)							(mol/volt)
	237_VU101B-A8	0	4	0.00561844	6.98056	0.106066	5.16075	0.174211	0.680019	12.3305	0.302517	100.339	0.0680624	8.00137	0.0531713	44.796	0.294068	98.3278	5.03991	49.9885	5.16842		237_VU101B-A8	0	0.0196579	0.0002028	0.008394	0.0001577	0.0084588	9.59e-05	0.0075242	0.0001924	6.26945	0.0139202		237_VU101B-A8	0	237_VU101B-A8	biotite	X1	Klaudia Kuiper	28.201	0.08	0.0030945	0.1	0.964275	0.3	1	1e-13
	238_VU101B-A8	0	4	0.004668	6.98578	0.0966887	5.29131	0.129269	0.766642	9.1017	0.301388	74.4639	0.0653202	8.02837	0.0539813	44.9453	0.298524	98.1299	3.72017	40.4774	4.29051		238_VU101B-A8	0	0.0196579	0.0002028	0.008394	0.0001577	0.0084588	9.59e-05	0.0075242	0.0001924	6.26945	0.0139202		238_VU101B-A8	0	238_VU101B-A8	biotite	X1	Klaudia Kuiper	28.201	0.08	0.0030945	0.1	0.964275	0.3	1	1e-13
	239_VU101B-A8	0	4	0.00349814	10.6399	0.131958	3.87771	0.147037	0.661966	10.4353	0.302791	84.7322	0.0714826	8.02004	0.0542891	44.8993	0.300234	98.7709	4.26524	34.0043	2.6452		239_VU101B-A8	0	0.0196579	0.0002028	0.008394	0.0001577	0.0084588	9.59e-05	0.0075242	0.0001924	6.26945	0.0139202		239_VU101B-A8	0	239_VU101B-A8	biotite	X1	Klaudia Kuiper	28.201	0.08	0.0030945	0.1	0.964275	0.3	1	1e-13
	241_VU101B-A8	0	4	0.0145104	3.16591	0.180339	3.13474	0.241904	0.723717	17.0619	0.302298	140.294	0.0605608	7.96888	0.0517617	44.6163	0.2863	96.9135	6.97377	40.6821	2.56239		241_VU101B-A8	0	0.0163651	0.0002277	0.0078375	0.0001341	0.0084068	0.0001767	0.0075664	0.00028	6.33048	0.0096161		241_VU101B-A8	0	241_VU101B-A8	biotite	X1	Klaudia Kuiper	28.201	0.08	0.0030945	0.1	0.964275	0.3	1	1e-13
	242_VU101B-A8	0	4	0.0153494	3.52142	0.128539	4.13705	0.224425	0.727432	15.8037	0.301209	130.685	0.0579084	7.97928	0.053102	44.6738	0.293704	96.4924	6.4595	52.8674	4.38588		242_VU101B-A8	0	0.0163651	0.0002277	0.0078375	0.0001341	0.0084068	0.0001767	0.0075664	0.00028	6.33048	0.0096161		242_VU101B-A8	0	242_VU101B-A8	biotite	X1	Klaudia Kuiper	28.201	0.08	0.0030945	0.1	0.964275	0.3	1	1e-13
	243_VU101B-A8	0	4	0.0187136	2.62421	0.163998	3.2628	0.248586	0.733331	17.5828	0.302497	145.137	0.0568286	7.93682	0.0516944	44.4389	0.285956	96.1506	7.18666	46.1015	3.0213		243_VU101B-A8	0	0.0163651	0.0002277	0.0078375	0.0001341	0.0084068	0.0001767	0.0075664	0.00028	6.33048	0.0096161		243_VU101B-A8	0	243_VU101B-A8	biotite	X1	Klaudia Kuiper	28.201	0.08	0.0030945	0.1	0.964275	0.3	1	1e-13
	249_VU101B-A8	0	4	0.0100792	3.365	0.168544	2.95734	0.21379	0.808114	15.2021	0.433959	125.706	0.299181	8.07129	0.0867941	45.1826	0.479921	97.608	6.21358	38.7843	2.31853		249_VU101B-A8	0	0.0195372	0.0002201	0.0083413	0.0001224	0.008182	0.0001164	0.007033	0.00029	6.299	0.0199095		249_VU101B-A8	0	249_VU101B-A8	biotite	X1	Klaudia Kuiper	28.201	0.08	0.0030945	0.1	0.964275	0.3	1	1e-13
	250_VU101B-A8	0	4	0.0162117	6.18541	0.162297	7.10111	0.218839	1.25637	18.0893	0.341662	147.914	0.117274	7.90922	0.0662177	44.2862	0.366325	96.7259	7.39369	47.9267	6.81453		250_VU101B-A8	0	0.0195372	0.0002201	0.0083413	0.0001224	0.008182	0.0001164	0.007033	0.00029	6.299	0.0199095		250_VU101B-A8	0	250_VU101B-A8	biotite	X1	Klaudia Kuiper	28.201	0.08	0.0030945	0.1	0.964275	0.3	1	1e-13
	251_VU101B-A8	0	4	0.0148818	2.98844	0.202846	2.92404	0.250096	0.753051	17.7542	0.30167	146.827	0.0603285	8.01995	0.0516235	44.8987	0.285492	96.9761	7.25672	37.6356	2.21264		251_VU101B-A8	0	0.0195372	0.0002201	0.0083413	0.0001224	0.008182	0.0001164	0.007033	0.00029	6.299	0.0199095		251_VU101B-A8	0	251_VU101B-A8	biotite	X1	Klaudia Kuiper	28.201	0.08	0.0030945	0.1	0.964275	0.3	1	1e-13
	253_VU101B-A8	0	4	0.00877445	4.17686	0.158407	2.76138	0.167847	0.762867	11.9813	0.303145	98.6314	0.0614088	8.01387	0.0528853	44.8651	0.292476	97.3478	4.89713	32.5233	1.80698		253_VU101B-A8	0	0.0193876	0.0001908	0.0080818	0.0001132	0.0094227	8.07e-05	0.0135442	0.000336	6.50842	0.0144418		253_VU101B-A8	0	253_VU101B-A8	biotite	X1	Klaudia Kuiper	28.201	0.08	0.0030945	0.1	0.964275	0.3	1	1e-13
	254_VU101B-A8	0	4	0.0105196	4.62027	0.110186	5.80074	0.201062	0.663641	14.2806	0.30508	117.447	0.0617902	8.00425	0.0538683	44.8119	0.29792	97.3244	5.83694	55.7296	6.47439		254_VU101B-A8	0	0.0193876	0.0001908	0.0080818	0.0001132	0.0094227	8.07e-05	0.0135442	0.000336	6.50842	0.0144418		254_VU101B-A8	0	254_VU101B-A8	biotite	X1	Klaudia Kuiper	28.201	0.08	0.0030945	0.1	0.964275	0.3	1	1e-13
	255_VU101B-A8	0	4	0.0145167	3.2244	0.242365	2.04153	0.293788	0.673186	20.8111	0.303308	170.885	0.0609104	8.00322	0.0513583	44.8062	0.28404	97.4662	8.50618	36.9225	1.52411		255_VU101B-A8	0	0.0193876	0.0001908	0.0080818	0.0001132	0.0094227	8.07e-05	0.0135442	0.000336	6.50842	0.0144418		255_VU101B-A8	0	255_VU101B-A8	biotite	X1	Klaudia Kuiper	28.201	0.08	0.0030945	0.1	0.964275	0.3	1	1e-13
	257_VU101B-A8	0	4	0.0131204	4.37522	0.160783	3.64296	0.169042	0.678559	11.8766	0.303054	99.3665	0.0618	8.0372	0.0575633	44.9941	0.318324	96.062	4.85433	31.7625	2.32219		257_VU101B-A8	0	0.0204966	0.0003072	0.0084373	0.0001068	0.0085845	0.0001679	0.0130429	0.0004743	6.61809	0.0137846		257_VU101B-A8	0	257_VU101B-A8	biotite	X1	Klaudia Kuiper	28.201	0.08	0.0030945	0.1	0.964275	0.3	1	1e-13
	258_VU101B-A8	0	4	0.0292627	2.5045	0.297871	2.16208	0.404378	0.646679	28.2999	0.302056	235.384	0.0633326	8.00895	0.0518797	44.8379	0.286918	96.2898	11.5671	40.8528	1.7837		258_VU101B-A8	0	0.0204966	0.0003072	0.0084373	0.0001068	0.0085845	0.0001679	0.0130429	0.0004743	6.61809	0.0137846		258_VU101B-A8	0	258_VU101B-A8	biotite	X1	Klaudia Kuiper	28.201	0.08	0.0030945	0.1	0.964275	0.3	1	1e-13
	259_VU101B-A8	0	4	0.0165471	4.15745	0.227733	3.13293	0.340357	0.695055	24.0477	0.303073	197.417	0.0611993	8.00403	0.05241	44.8107	0.289855	97.4979	9.82908	45.406	2.85836		259_VU101B-A8	0	0.0204966	0.0003072	0.0084373	0.0001068	0.0085845	0.0001679	0.0130429	0.0004743	6.61809	0.0137846		259_VU101B-A8	0	259_VU101B-A8	biotite	X1	Klaudia Kuiper	28.201	0.08	0.0030945	0.1	0.964275	0.3	1	1e-13
			S	0.196271	1.06763	2.53862	0.944733	3.42463	0.201374	244.659	0.0848097	2015.23	0.0257934
	Information on Analysis and Constants Used in Calculations									Results		40(a)/36(a)	± 2s	40(r)/39(k)	± 2s	Age	± 2s	MSWD	39Ar(k)	K/Ca	± 2s
																(Ma)			(%,n)
	Sample = 237_VU101B-A8				Age Equations = Min et al. (2000)					Age Plateau				7.99886	0.0179811	44.7821	0.133109	1.61432	100	38.5526	2.77149
	Material = biotite				Negative Intensities = Allowed										0.00224796		0.00297236	0.067088	15
	Location = X1				Decay Constant 40K = 5.460 ± 0.053 E-10 1/a					Full External Error							0.93857	1.75593	2σ Confidence Limit
	Analyst = Klaudia Kuiper				Decay Constant 39Ar = 2.940 ± 0.016 E-07 1/h					Analytical Error							0.0994467	1.27056	Error Magnification
	Project = VU101				Decay Constant 37Ar = 8.230 ± 0.012 E-04 1/h
	Mass Discrimination Law = LIN				Decay Constant 36Cl = 2.257 ± 0.015 E-06 1/a					Total Fusion Age				7.99753	0.0151081	44.7748	0.121686		15	41.4408	0.786158
	Irradiation = VU101				Decay Activity 40K(EC,β⁺) = 3.310 ± 0.030 1/gs										0.0018891		0.00271775
	J = 0.00309450 ± 0.00000309				Decay Activity 40K(β⁻) = 27.890 ± 0.150 1/gs					Full External Error							0.936868
	FCs = 28.201 ± 0.023 Ma				Atmospheric Ratio 40/36(a) = 298.56 ± 0.31					Analytical Error							0.0835576
	IGSN = Undefined				Atmospheric Ratio 38/36(a) = 0.1885 ± 0.0003
	Preferred Age = Undefined				Production Ratio 39/37(ca) = 0.000673 ± 0.000004					Normal Isochron		242.378	79.663	8.04108	0.0638401	45.0156	0.36406	1.60207	100
	Classification = Undefined				Production Ratio 36/37(ca) = 0.000264 ± 0.000002								0.328672		0.00793923		0.00808741	0.0764223	15
	Experiment Type = Undefined				Production Ratio 40/39(k) = 0.000860 ± 0.000070					Full External Error							1.00233	1.78446	2σ Confidence Limit
	Extraction Method = Undefined				Production Ratio 38/39(k) = 0.012110 ± 0.000030					Analytical Error							0.35303	1.26573	Error Magnification
	Heating = 45 sec				Production Ratio 36/38(cl) = 262.80 ± 1.71												1		Number of Iterations
	Isolation = 5.00 min				Scaling Ratio K/Ca = 0.430												4.0419e-06		Convergence
	Instrument = HELIX				Abundance Ratio 40K/K = 1.1700 ± 0.0100 E-04
	Lithology = Undefined				Atomic Weight K = 39.0983 ± 0.0001 g					Inverse Isochron Clustered Points		251.148	70.345	8.03568	0.0630155	44.9857	0.359631	1.56006	100
	Lat-Lon = Undefined - Undefined												0.280094		0.00784196		0.00799433	0.0884266	15
	Feature = Undefined									Full External Error							1.00016	1.78446	2σ Confidence Limit
										Analytical Error							0.348476	1.24902	Error Magnification
																	3		Number of Iterations
																	0.000163337		Convergence
																	0.0291965		Spreading Factor
[truncated: 39 more columns]

## Sheet: Hidden Data
Double Line Plot Age Plateau			Double Line Plot K/Ca Plateau			X-Y Plot Normal Isochron		X-Y Plot Inverse Isochron		Error Ellipses Normal Isochron		Error Ellipses Inverse Isochron
Ar39k%	Line 1	Line 2	Ar39k%	Line 1	Line 2	X-axis	Y-axis	X-axis	Y-axis	X-axis	Y-axis	X-axis	Y-axis
0	44.5019	45.0901	0	44.8201	55.157	2208.01	17965.7	0.122902	5.56617e-05			0.123664	5.56784e-05
5.03991	44.5019	45.0901	5.03991	44.8201	55.157	1962.45	16053.9	0.122242	6.22903e-05			0.123638	5.36542e-05
5.03991	45.2438	44.6468	5.03991	44.7679	36.1869	3017.47	24498.8	0.123168	4.08183e-05			0.123562	5.17668e-05
8.76007	45.2438	44.6468	8.76007	44.7679	36.1869	1180.38	9704.84	0.121628	0.000103041			0.123441	5.01448e-05
8.76007	44.599	45.1995	8.76007	31.3591	36.6495	1032.38	8536.25	0.120941	0.000117147			0.123283	4.88988e-05
13.0253	44.599	45.1995	13.0253	31.3591	36.6495	942.152	7776.25	0.121158	0.000128597			0.123099	4.81137e-05
13.0253	44.9026	44.33	13.0253	43.2445	38.1197	1516.01	12534.7	0.120945	7.97787e-05			0.122902	4.7843e-05
19.9991	44.9026	44.33	19.9991	43.2445	38.1197	1118.77	9147.15	0.122308	0.000109324			0.122704	4.81051e-05
19.9991	44.3801	44.9675	19.9991	48.4816	57.2533	1197.98	9906.26	0.120931	0.000100946			0.122521	4.88822e-05
26.4586	44.3801	44.9675	26.4586	48.4816	57.2533	1372.84	11300.3	0.121487	8.84933e-05			0.122363	5.01213e-05
26.4586	44.7249	44.153	26.4586	49.1228	43.0802	1362.13	11201.4	0.121604	8.92745e-05			0.122242	5.17379e-05
33.6452	44.7249	44.153	33.6452	49.1228	43.0802	1440.92	11830.6	0.121796	8.45267e-05			0.122165	5.3622e-05
33.6452	44.7027	45.6625	33.6452	36.4658	41.1028	908.528	7600.58	0.119534	0.000131569			0.122139	5.56451e-05
39.8588	44.7027	45.6625	39.8588	36.4658	41.1028	970.167	8068.58	0.12024	0.000123938			0.122165	5.76693e-05
39.8588	44.6526	43.9199	39.8588	54.7412	41.1121	1459.6	11981.3	0.121824	8.34636e-05			0.122242	5.95567e-05
47.2525	44.6526	43.9199	47.2525	54.7412	41.1121							0.122363	6.11786e-05
47.2525	44.6132	45.1842	47.2525	35.423	39.8483							0.122521	6.24246e-05
54.5092	44.6132	45.1842	54.5092	35.423	39.8483							0.122704	6.32097e-05
54.5092	45.1576	44.5726	54.5092	34.3303	30.7163							0.122902	6.34804e-05
59.4064	45.1576	44.5726	59.4064	34.3303	30.7163							0.123099	6.32183e-05
59.4064	44.514	45.1098	59.4064	49.2552	62.204							0.123283	6.24413e-05
65.2433	44.514	45.1098	65.2433	49.2552	62.204							0.123441	6.12022e-05
65.2433	45.0903	44.5222	65.2433	38.4466	35.3984							0.123562	5.95855e-05
73.7495	45.0903	44.5222	73.7495	38.4466	35.3984							0.123638	5.77014e-05
73.7495	44.6758	45.3125	73.7495	29.4404	34.0847							0.123664	5.56784e-05
78.6038	44.6758	45.3125	78.6038	29.4404	34.0847
78.6038	45.1248	44.551	78.6038	42.6365	39.0691							0.122996	6.23075e-05
90.1709	45.1248	44.551	90.1709	42.6365	39.0691							0.12297	6.00397e-05
90.1709	44.5208	45.1006	90.1709	42.5477	48.2644							0.122895	5.79253e-05
100	44.5208	45.1006	100	42.5477	48.2644							0.122775	5.61083e-05
												0.122619	5.47127e-05
												0.122437	5.38334e-05
												0.122242	5.35304e-05
												0.122047	5.38245e-05
												0.121865	5.46954e-05
												0.121709	5.6084e-05
												0.121589	5.78954e-05
												0.121513	6.00064e-05
												0.121488	6.22731e-05
												0.121513	6.45409e-05
												0.121589	6.66553e-05
												0.121709	6.84723e-05
												0.121865	6.98679e-05
												0.122047	7.07472e-05
												0.122242	7.10502e-05
												0.122437	7.07561e-05
												0.122619	6.98852e-05
												0.122775	6.84967e-05
												0.122895	6.66852e-05
												0.12297	6.45742e-05
												0.122996	6.23076e-05
												0.123934	4.08317e-05
												0.123908	3.85571e-05
												0.123832	3.64367e-05
												0.12371	3.46148e-05
												0.123551	3.32157e-05
												0.123366	3.23347e-05
												0.123168	3.20319e-05
												0.12297	3.23278e-05
												0.122785	3.32023e-05
												0.122626	3.45959e-05
												0.122504	3.64135e-05
												0.122428	3.85312e-05
												0.122402	4.08049e-05
												0.122428	4.30794e-05
												0.122504	4.51999e-05
												0.122626	4.70217e-05
												0.122785	4.84208e-05
												0.12297	4.93018e-05
												0.123168	4.96047e-05
												0.123366	4.93088e-05
												0.123551	4.84343e-05
												0.12371	4.70407e-05
												0.123832	4.52231e-05
												0.123908	4.31053e-05
												0.123934	4.08317e-05
												0.122378	0.000103066
												0.122352	0.00010137
												0.122277	9.97872e-05
												0.122158	9.84266e-05
												0.122003	9.73805e-05
												0.121822	9.67201e-05
												0.121628	9.64906e-05
												0.121434	9.67074e-05
												0.121253	9.73559e-05
												0.121097	9.83919e-05
												0.120978	9.97447e-05
												0.120903	0.000101322
												0.120878	0.000103017
												0.120903	0.000104713
												0.120978	0.000106295
												0.121097	0.000107656
												0.121253	0.000108702
												0.121434	0.000109363
												0.121628	0.000109592
												0.121822	0.000109375
												0.122003	0.000108727
												0.122158	0.000107691
												0.122277	0.000106338
												0.122352	0.00010476
												0.122378	0.000103066
												0.121683	0.000117173
												0.121658	0.000115031
												0.121584	0.000113033
												0.121466	0.000111315
												0.121312	0.000109995
												0.121133	0.000109162
												0.120941	0.000108873
												0.120749	0.000109149
												0.12057	0.000109969
												0.120417	0.000111279
												0.120299	0.000112988
												0.120225	0.000114981
												0.120199	0.000117122
												0.120225	0.000119264
												0.120299	0.000121262
												0.120417	0.00012298
												0.12057	0.0001243
												0.120749	0.000125133
												0.120941	0.000125421
												0.121133	0.000125146
												0.121312	0.000124326
												0.121466	0.000123016
												0.121584	0.000121307
												0.121658	0.000119314
												0.121683	0.000117173
												0.121903	0.000128624
												0.121878	0.000126871
												0.121804	0.000125235
												0.121685	0.000123829
												0.121531	0.000122748
												0.121351	0.000122065
												0.121158	0.000121827
												0.120965	0.000122051
												0.120785	0.000122721
												0.12063	0.000123791
												0.120512	0.000125189
												0.120437	0.000126819
												0.120412	0.00012857
												0.120437	0.000130323
												0.120512	0.000131958
												0.12063	0.000133364
												0.120785	0.000134446
												0.120965	0.000135129
												0.121158	0.000135366
												0.121351	0.000135143
												0.121531	0.000134473
												0.121685	0.000133403
												0.121804	0.000132005
												0.121878	0.000130375
												0.121903	0.000128624
												0.12222	8.00497e-05
												0.122177	7.864e-05
												0.122049	7.73079e-05
												0.121847	7.61441e-05
												0.121582	7.52281e-05
												0.121275	7.46222e-05
												0.120945	7.43677e-05
												0.120615	7.44819e-05
												0.120307	7.49571e-05
												0.120043	7.57609e-05
												0.119841	7.68385e-05
												0.119713	7.81164e-05
												0.11967	7.95077e-05
												0.119713	8.09174e-05
												0.119841	8.22495e-05
												0.120043	8.34132e-05
												0.120307	8.43293e-05
												0.120615	8.49352e-05
												0.120945	8.51897e-05
												0.121275	8.50755e-05
												0.121582	8.46003e-05
												0.121847	8.37965e-05
												0.122049	8.27189e-05
												0.122177	8.14409e-05
												0.12222	8.00497e-05
												0.123192	0.000109407
												0.123162	0.000105894
												0.123073	0.000102615
												0.122933	9.97925e-05
												0.12275	9.762e-05
												0.122537	9.6245e-05
												0.122308	9.57613e-05
												0.122079	9.62019e-05
												0.121866	9.75367e-05
												0.121683	9.96748e-05
												0.121543	0.00010247
												0.121454	0.000105733
												0.121424	0.00010924
												0.121454	0.000112753
												0.121543	0.000116033
												0.121683	0.000118855
												0.121866	0.000121027
												0.122079	0.000122402
												0.122308	0.000122886
												0.122537	0.000122445
												0.12275	0.000121111
												0.122933	0.000118973
												0.123073	0.000116177
												0.123162	0.000112914
												0.123192	0.000109407
												0.121675	0.00010097
												0.12165	9.94009e-05
												0.121576	9.7937e-05
												0.121457	9.66782e-05
												0.121303	9.57103e-05
												0.121124	9.50991e-05
												0.120931	9.48864e-05
												0.120739	9.50867e-05
												0.120559	9.56864e-05
												0.120405	9.66444e-05
												0.120287	9.78956e-05
												0.120212	9.93548e-05
												0.120187	0.000100922
												0.120212	0.000102492
												0.120287	0.000103955
												0.120405	0.000105214
												0.120559	0.000106182
												0.120739	0.000106793
												0.120931	0.000107006
												0.121124	0.000106806
												0.121303	0.000106206
												0.121457	0.000105248
												0.121576	0.000103997
												0.12165	0.000102538
												0.121675	0.00010097
												0.122238	8.85148e-05
												0.122213	8.65903e-05
												0.122138	8.47953e-05
												0.122018	8.32524e-05
												0.121863	8.20667e-05
												0.121681	8.13189e-05
												0.121487	8.106e-05
												0.121292	8.13077e-05
												0.121111	8.20451e-05
												0.120955	8.32219e-05
												0.120836	8.47579e-05
												0.120761	8.65485e-05
												0.120735	8.84717e-05
												0.120761	9.03963e-05
												0.120836	9.21912e-05
												0.120955	9.37341e-05
												0.121111	9.49198e-05
												0.121292	9.56676e-05
												0.121487	9.59265e-05
												0.121681	9.56788e-05
												0.121863	9.49414e-05
												0.122018	9.37646e-05
												0.122138	9.22286e-05
												0.122213	9.0438e-05
												0.122238	8.85149e-05
												0.122361	8.92964e-05
												0.122335	8.71531e-05
												0.122259	8.51543e-05
												0.122139	8.34364e-05
												0.121982	8.21162e-05
												0.1218	8.1284e-05
												0.121604	8.09962e-05
												0.121408	8.12726e-05
												0.121225	8.20943e-05
												0.121068	8.34054e-05
												0.120948	8.51164e-05
												0.120872	8.71107e-05
												0.120847	8.92526e-05
												0.120872	9.13959e-05
												0.120948	9.33947e-05
												0.121068	9.51126e-05
												0.121225	9.64327e-05
												0.121408	9.7265e-05
												0.121604	9.75528e-05
												0.1218	9.72764e-05
												0.121982	9.64547e-05
												0.122139	9.51436e-05
												0.122259	9.34326e-05
												0.122335	9.14382e-05
												0.122361	8.92964e-05
												0.12255	8.4547e-05
												0.122524	8.31281e-05
												0.122449	8.18044e-05
												0.122329	8.06663e-05
												0.122173	7.97912e-05
												0.121991	7.92389e-05
												0.121796	7.90469e-05
												0.121601	7.92284e-05
												0.12142	7.9771e-05
												0.121264	8.06376e-05
												0.121144	8.17693e-05
												0.121068	8.30889e-05
												0.121043	8.45065e-05
												0.121068	8.59254e-05
												0.121144	8.72491e-05
												0.121264	8.83872e-05
												0.12142	8.92622e-05
												0.121601	8.98146e-05
												0.121796	9.00065e-05
												0.121991	8.98251e-05
												0.122173	8.92825e-05
												0.122329	8.84159e-05
												0.122449	8.72842e-05
												0.122524	8.59646e-05
												0.12255	8.4547e-05
												0.120273	0.000131601
												0.120248	0.000128609
												0.120174	0.000125819
												0.120057	0.00012342
												0.119904	0.000121577
												0.119725	0.000120415
												0.119534	0.000120012
												0.119343	0.000120398
												0.119164	0.000121544
												0.119011	0.000123374
												0.118894	0.000125762
												0.11882	0.000128546
												0.118795	0.000131536
												0.11882	0.000134528
												0.118894	0.000137319
												0.119011	0.000139717
												0.119164	0.000141561
												0.119343	0.000142723
												0.119534	0.000143125
												0.119725	0.00014274
												0.119904	0.000141593
												0.120057	0.000139763
												0.120174	0.000137375
												0.120248	0.000134591
												0.120273	0.000131601
												0.120982	0.00012397
												0.120957	0.000122356
												0.120883	0.000120851
												0.120765	0.000119555
												0.120611	0.000118559
												0.120432	0.000117928
												0.12024	0.000117708
												0.120048	0.000117912
												0.119869	0.000118526
												0.119715	0.00011951
												0.119597	0.000120795
												0.119523	0.000122294
												0.119498	0.000123905
												0.119523	0.000125519
												0.119597	0.000127025
												0.119715	0.00012832
												0.119869	0.000129317
												0.120048	0.000129947
												0.12024	0.000130167
												0.120432	0.000129963
												0.120611	0.000129349
												0.120765	0.000128365
												0.120883	0.00012708
												0.120957	0.000125581
												0.120982	0.00012397
												0.122577	8.34838e-05
												0.122551	8.16789e-05
												0.122476	7.99957e-05
												0.122356	7.85487e-05
												0.1222	7.74367e-05
												0.122019	7.67355e-05
												0.121824	7.64927e-05
												0.121629	7.6725e-05
												0.121447	7.74165e-05
												0.121291	7.85201e-05
												0.121171	7.99606e-05
												0.121096	8.16398e-05
												0.12107	8.34434e-05
												0.121096	8.52482e-05
												0.121171	8.69315e-05
												0.121291	8.83784e-05
												0.121447	8.94904e-05
												0.121629	9.01917e-05
												0.121824	9.04345e-05
												0.122019	9.02022e-05
												0.1222	8.95107e-05
												0.122356	8.84071e-05
												0.122476	8.69666e-05
												0.122551	8.52873e-05
												0.122577	8.34838e-05
