# Supplementary material for: Exploring a link between the Middle Eocene Climatic Optimum and Neotethys continental arc flare-up
Source: Copernicus journal article supplement (doi:10.5194/cp-17-229-2021), 2021-01-18
Supplement: Supplementary file 13 [file S22_VU101B-A8e.xls]

## Sheet: Summary Table
	Relative Abundances			36Ar [fA]	%1s	37Ar [fA]	%1s	38Ar [fA]	%1s	39Ar [fA]	%1s	40Ar [fA]	%1s	40(r)/39(k)	± 2s	Age	± 2s	40Ar(r)	39Ar(k)	K/Ca	± 2s		Procedure Blanks		36Ar [fA]	1s	37Ar [fA]	1s	38Ar [fA]	1s	39Ar [fA]	1s	40Ar [fA]	1s		Sample Parameters		Sample	Material	Location	Analyst	Standard	%1s	J	%1s	MDF	%1s	Volume Ratio	Sensitivity
																(Ma)		(%)	(%)																							(in Ma)							(mol/volt)
	028_VU101B-A8	0	4	0.0273865	1.34021	0.226631	24.1827	0.207342	0.338796	14.8616	0.11457	127.379	0.0222484	8.02149	0.0239069	44.9072	0.132211	93.5873	8.36688	28.1975	13.638		028_VU101B-A8	0	0.0136789	0.0001524	0.0087968	0.0001165	0.0050453	0.0001078	-0.0129534	0.0041358	3.51268	0.0032213		028_VU101B-A8	0	028_VU101B-A8	biotite	X1	Klaudia Kuiper	28.201	0.08	0.0030945	0.1	0.973769	0.1	1	1e-13
	029_VU101B-A8	0	4	0.0231815	1.57572	-0.0135206	325.399	0.108615	0.554707	7.66306	0.151838	68.2338	0.0546702	8.00027	0.0387238	44.7899	0.214166	89.8479	4.31424	-243.712	1586.07		029_VU101B-A8	0	0.0136789	0.0001524	0.0087968	0.0001165	0.0050453	0.0001078	-0.0129534	0.0041358	3.51268	0.0032213		029_VU101B-A8	0	029_VU101B-A8	biotite	X1	Klaudia Kuiper	28.201	0.08	0.0030945	0.1	0.973769	0.1	1	1e-13
	031_VU101B-A8	0	4	0.0182064	1.25489	0.202465	25.208	0.162015	0.403469	11.7005	0.129908	98.7676	0.0255137	7.97751	0.024198	44.664	0.133839	94.5048	6.58723	24.8496	12.5283		031_VU101B-A8	0	0.0132214	0.0001204	0.0085332	0.0001162	0.0050562	6.86e-05	-0.0021837	0.0040496	3.5157	0.0066097		031_VU101B-A8	0	031_VU101B-A8	biotite	X1	Klaudia Kuiper	28.201	0.08	0.0030945	0.1	0.973769	0.1	1	1e-13
	032_VU101B-A8	0	4	0.0170902	2.35974	0.500701	8.62121	0.29648	0.337224	21.6004	0.113481	178.516	0.0225483	8.02954	0.0216948	44.9518	0.119975	97.1559	12.1607	18.5501	3.19876		032_VU101B-A8	0	0.0132214	0.0001204	0.0085332	0.0001162	0.0050562	6.86e-05	-0.0021837	0.0040496	3.5157	0.0066097		032_VU101B-A8	0	032_VU101B-A8	biotite	X1	Klaudia Kuiper	28.201	0.08	0.0030945	0.1	0.973769	0.1	1	1e-13
	033_VU101B-A8	0	4	0.0191564	1.79694	0.22396	22.4189	0.327754	0.271614	23.9788	0.107386	198.033	0.0296174	8.02025	0.019862	44.9004	0.109842	97.1127	13.4998	46.0388	20.643		033_VU101B-A8	0	0.0132214	0.0001204	0.0085332	0.0001162	0.0050562	6.86e-05	-0.0021837	0.0040496	3.5157	0.0066097		033_VU101B-A8	0	033_VU101B-A8	biotite	X1	Klaudia Kuiper	28.201	0.08	0.0030945	0.1	0.973769	0.1	1	1e-13
	035_VU101B-A8	0	4	0.0282019	1.88333	0.381014	14.3099	0.501323	0.262475	36.8776	0.105784	304.579	0.0199935	8.03108	0.0193358	44.9603	0.106929	97.2372	20.7616	41.6185	11.9115		035_VU101B-A8	0	0.0143653	0.0001405	0.0090032	7.83e-05	0.0059129	7.11e-05	-0.0030001	0.0043498	3.5403	0.0037946		035_VU101B-A8	0	035_VU101B-A8	biotite	X1	Klaudia Kuiper	28.201	0.08	0.0030945	0.1	0.973769	0.1	1	1e-13
	036_VU101B-A8	0	4	0.0199518	1.63331	0.197997	22.1928	0.292902	0.313899	21.3364	0.116765	177.522	0.0250203	8.04107	0.0212979	45.0155	0.117776	96.6453	12.0121	46.337	20.5673		036_VU101B-A8	0	0.0143653	0.0001405	0.0090032	7.83e-05	0.0059129	7.11e-05	-0.0030001	0.0043498	3.5403	0.0037946		036_VU101B-A8	0	036_VU101B-A8	biotite	X1	Klaudia Kuiper	28.201	0.08	0.0030945	0.1	0.973769	0.1	1	1e-13
	037_VU101B-A8	0	4	0.00940124	2.67169	-0.0569744	87.3813	0.169436	0.459671	12.375	0.130419	102.253	0.0308336	8.03501	0.0247537	44.982	0.136889	97.2426	6.96706	-93.3977	163.224		037_VU101B-A8	0	0.0143653	0.0001405	0.0090032	7.83e-05	0.0059129	7.11e-05	-0.0030001	0.0043498	3.5403	0.0037946		037_VU101B-A8	0	037_VU101B-A8	biotite	X1	Klaudia Kuiper	28.201	0.08	0.0030945	0.1	0.973769	0.1	1	1e-13
	043_VU101B-A8	0		0.0152459	2.59885	0.172929	28.5655	0.158534	0.415859	11.5255	0.132386	96.237	0.0531504	7.95557	0.0307412	44.5426	0.170041	95.2763	6.48871	28.6587	16.3731		043_VU101B-A8	0	0.013807	0.0001746	0.0084232	9.93e-05	0.005485	6.41e-05	-0.0018686	0.004762	3.49466	0.0041569		043_VU101B-A8	0	043_VU101B-A8	biotite	X1	Klaudia Kuiper	28.201	0.08	0.0030945	0.1	0.973769	0.1	1	1e-13
	044_VU101B-A8	0	4	0.0220565	1.80279	0.218182	15.3138	0.215427	0.368426	15.7049	0.123197	132.781	0.0280711	8.03593	0.025378	44.9871	0.140341	95.0455	8.84165	30.9515	9.48002		044_VU101B-A8	0	0.013807	0.0001746	0.0084232	9.93e-05	0.005485	6.41e-05	-0.0018686	0.004762	3.49466	0.0041569		044_VU101B-A8	0	044_VU101B-A8	biotite	X1	Klaudia Kuiper	28.201	0.08	0.0030945	0.1	0.973769	0.1	1	1e-13
			S	0.199878	0.585155	2.05338	7.36435	2.43983	0.11092	177.624	0.0395312	1484.3	0.00918108
	Information on Analysis and Constants Used in Calculations									Results		40(a)/36(a)	± 2s	40(r)/39(k)	± 2s	Age	± 2s	MSWD	39Ar(k)	K/Ca	± 2s
																(Ma)			(%,n)
	Sample = 028_VU101B-A8				Age Equations = Min et al. (2000)					Age Plateau Error Mean				8.02374	0.012626	44.9197	0.112922	2.6858	93.5113	22.4659	5.59217
	Material = biotite				Negative Intensities = Allowed										0.00157358		0.00251385	0.00596166	9
	Location = X1				Decay Constant 40K = 5.460 ± 0.053 E-10 1/a					Full External Error							0.938727	2	2σ Confidence Limit
	Analyst = Klaudia Kuiper				Decay Constant 39Ar = 2.940 ± 0.016 E-07 1/h					Analytical Error							0.0698242	1.63884	Error Magnification
	Project = VU101				Decay Constant 37Ar = 8.230 ± 0.012 E-04 1/h
	Mass Discrimination Law = LIN				Decay Constant 36Cl = 2.257 ± 0.015 E-06 1/a					Total Fusion Age				8.02077	0.00762239	44.9033	0.0982196		10	37.196	5.47857
	Irradiation = VU101				Decay Activity 40K(EC,β⁺) = 3.310 ± 0.030 1/gs										0.000950331		0.00218736
	J = 0.00309450 ± 0.00000309				Decay Activity 40K(β⁻) = 27.890 ± 0.150 1/gs					Full External Error							0.936737
	FCs = 28.201 ± 0.023 Ma				Atmospheric Ratio 40/36(a) = 298.56 ± 0.31					Analytical Error							0.0421538
	IGSN = Undefined				Atmospheric Ratio 38/36(a) = 0.1885 ± 0.0003
	Preferred Age = Undefined				Production Ratio 39/37(ca) = 0.000673 ± 0.000004					Normal Isochron Error Chron		280.139	21.5078	8.04477	0.0270712	45.036	0.174144	2.35857	93.5113
	Classification = Undefined				Production Ratio 36/37(ca) = 0.000264 ± 0.000002								0.0767755		0.00336507		0.00386679	0.0208441	9
	Experiment Type = Undefined				Production Ratio 40/39(k) = 0.000860 ± 0.000070					Full External Error							0.950391	2.06904	2σ Confidence Limit
	Extraction Method = Undefined				Production Ratio 38/39(k) = 0.012110 ± 0.000030					Analytical Error							0.1497	1.53577	Error Magnification
	Heating = 45 sec				Production Ratio 36/38(cl) = 262.80 ± 1.71												1		Number of Iterations
	Isolation = 5.00 min				Scaling Ratio K/Ca = 0.430												1.27837e-05		Convergence
	Instrument = HELIX				Abundance Ratio 40K/K = 1.1700 ± 0.0100 E-04
	Lithology = Undefined				Atomic Weight K = 39.0983 ± 0.0001 g					Inverse Isochron Error Chron		282.25	21.1626	8.04232	0.0267356	45.0224	0.172539	2.30199	93.5113
	Lat-Lon = Undefined - Undefined												0.0749782		0.00332437		0.00383229	0.0240957	9
	Feature = Undefined									Full External Error							0.949824	2.06904	2σ Confidence Limit
										Analytical Error							0.147845	1.51723	Error Magnification
																	3		Number of Iterations
																	1.89008e-05		Convergence
																	0.070612		Spreading Factor
[truncated: 39 more columns]

## Sheet: Hidden Data
Double Line Plot Age Plateau			Double Line Plot K/Ca Plateau			X-Y Plot Normal Isochron		X-Y Plot Inverse Isochron		Error Ellipses Normal Isochron		Error Ellipses Inverse Isochron
Ar39k%	Line 1	Line 2	Ar39k%	Line 1	Line 2	X-axis	Y-axis	X-axis	Y-axis	X-axis	Y-axis	X-axis	Y-axis
0	44.775	45.0394	0	14.5596	41.8355	544.045	4662.61	0.116683	0.000214472			0.116955	0.00021449
8.36688	44.775	45.0394	8.36688	14.5596	41.8355	330.592	2943.39	0.112317	0.000339745			0.116946	0.000212997
8.36688	45.0041	44.5758	8.36688	1342.36	-1829.78	644.817	5442.59	0.118476	0.000183736			0.116918	0.000211604
12.6811	45.0041	44.5758	12.6811	1342.36	-1829.78	1274.82	10534.8	0.121011	9.49235e-05			0.116875	0.000210406
12.6811	44.5302	44.7979	12.6811	12.3213	37.3779	1256.62	10377	0.121097	9.63674e-05			0.116819	0.000209485
19.2683	44.5302	44.7979	19.2683	12.3213	37.3779	1313.34	10846.1	0.121089	9.21988e-05			0.116753	0.000208905
19.2683	45.0717	44.8318	19.2683	21.7488	15.3513	1072.95	8926.23	0.120202	0.000112029			0.116683	0.000208703
31.429	45.0717	44.8318	31.429	21.7488	15.3513	1315.35	10867.4	0.121036	9.20184e-05			0.116612	0.000208895
31.429	44.7906	45.0102	31.429	25.3958	66.6818	758.603	6333.67	0.119773	0.000157886			0.116546	0.000209467
44.9288	44.7906	45.0102	44.9288	25.3958	66.6818	714.201	6037.82	0.118288	0.000165623			0.11649	0.00021038
44.9288	45.0672	44.8533	44.9288	53.53	29.7071							0.116447	0.000211572
65.6904	45.0672	44.8533	65.6904	53.53	29.7071							0.116419	0.000212961
65.6904	44.8977	45.1333	65.6904	25.7697	66.9042							0.11641	0.000214454
77.7026	44.8977	45.1333	77.7026	25.7697	66.9042							0.116419	0.000215948
77.7026	45.1189	44.8451	77.7026	69.8267	-256.622							0.116447	0.000217341
84.6696	45.1189	44.8451	84.6696	69.8267	-256.622							0.11649	0.000218538
84.6696	44.3726	44.7127	84.6696	12.2855	45.0318							0.116546	0.000219459
91.1583	44.3726	44.7127	91.1583	12.2855	45.0318							0.116612	0.00022004
91.1583	45.1274	44.8467	91.1583	40.4315	21.4715							0.116683	0.000220241
100	45.1274	44.8467	100	40.4315	21.4715							0.116753	0.000220049
												0.116819	0.000219477
												0.116875	0.000218564
												0.116918	0.000217372
												0.116946	0.000215983
												0.116955	0.00021449
												0.112679	0.000339871
												0.112667	0.000337092
												0.112631	0.000334494
												0.112573	0.000332254
												0.112498	0.000330525
												0.112411	0.000329424
												0.112317	0.000329026
												0.112223	0.000329359
												0.112136	0.000330399
												0.112061	0.000332076
												0.112003	0.000334276
												0.111967	0.000336849
												0.111954	0.000339619
												0.111967	0.000342397
												0.112003	0.000344995
												0.112061	0.000347235
												0.112136	0.000348964
												0.112223	0.000350065
												0.112317	0.000350463
												0.112411	0.000350131
												0.112498	0.00034909
												0.112573	0.000347413
												0.112631	0.000345213
												0.112667	0.000342641
												0.112679	0.000339871
												0.11879	0.000183754
												0.118779	0.000182554
												0.118748	0.000181434
												0.118698	0.000180471
												0.118633	0.00017973
												0.118557	0.000179263
												0.118476	0.0001791
												0.118395	0.000179253
												0.118319	0.000179712
												0.118254	0.000180445
												0.118204	0.000181402
												0.118173	0.000182519
												0.118162	0.000183718
												0.118173	0.000184918
												0.118204	0.000186038
												0.118254	0.000187001
												0.118319	0.000187742
												0.118395	0.000188209
												0.118476	0.000188372
												0.118557	0.000188219
												0.118633	0.00018776
												0.118698	0.000187027
												0.118748	0.00018607
												0.118779	0.000184953
												0.11879	0.000183754
												0.121291	9.49319e-05
												0.121281	9.37615e-05
												0.121253	9.26704e-05
												0.121209	9.17328e-05
												0.121151	9.10127e-05
												0.121083	9.0559e-05
												0.121011	9.04028e-05
												0.120938	9.05547e-05
												0.120871	9.10043e-05
												0.120813	9.1721e-05
												0.120768	9.26559e-05
												0.12074	9.37454e-05
												0.120731	9.49151e-05
												0.12074	9.60855e-05
												0.120768	9.71766e-05
												0.120813	9.81142e-05
												0.120871	9.88343e-05
												0.120938	9.9288e-05
												0.121011	9.94442e-05
												0.121083	9.92923e-05
												0.121151	9.88427e-05
												0.121209	9.8126e-05
												0.121253	9.71911e-05
												0.121281	9.61016e-05
												0.121291	9.49319e-05
												0.121367	9.63826e-05
												0.121358	9.54814e-05
												0.121331	9.46406e-05
												0.121288	9.39175e-05
												0.121232	9.33613e-05
												0.121167	9.301e-05
												0.121097	9.28875e-05
												0.121027	9.30022e-05
												0.120962	9.33461e-05
												0.120906	9.3896e-05
												0.120863	9.46143e-05
												0.120836	9.5452e-05
												0.120827	9.63522e-05
												0.120836	9.72533e-05
												0.120863	9.80941e-05
												0.120906	9.88173e-05
												0.120962	9.93734e-05
												0.121027	9.97247e-05
												0.121097	9.98472e-05
												0.121167	9.97326e-05
												0.121232	9.93886e-05
												0.121288	9.88388e-05
												0.121331	9.81205e-05
												0.121358	9.72827e-05
												0.121367	9.63826e-05
												0.12135	9.22056e-05
												0.121341	9.13022e-05
												0.121315	9.046e-05
												0.121273	8.97362e-05
												0.121219	8.91802e-05
												0.121156	8.88299e-05
												0.121089	8.87093e-05
												0.121021	8.88264e-05
												0.120958	8.91733e-05
												0.120904	8.97265e-05
												0.120863	9.04481e-05
												0.120837	9.1289e-05
												0.120828	9.21919e-05
												0.120837	9.30953e-05
												0.120863	9.39376e-05
												0.120904	9.46614e-05
												0.120958	9.52173e-05
												0.121021	9.55676e-05
												0.121089	9.56883e-05
												0.121156	9.55711e-05
												0.121219	9.52242e-05
												0.121273	9.46711e-05
												0.121315	9.39495e-05
												0.121341	9.31085e-05
												0.12135	9.22056e-05
												0.120489	0.000112041
												0.120479	0.00011109
												0.120451	0.000110202
												0.120405	0.000109439
												0.120346	0.000108853
												0.120276	0.000108483
												0.120202	0.000108355
												0.120128	0.000108477
												0.120058	0.000108841
												0.119999	0.000109423
												0.119953	0.000110182
												0.119925	0.000111067
												0.119915	0.000112018
												0.119925	0.000112969
												0.119953	0.000113856
												0.119999	0.000114619
												0.120058	0.000115206
												0.120128	0.000115576
												0.120202	0.000115704
												0.120276	0.000115582
												0.120346	0.000115217
												0.120405	0.000114636
												0.120451	0.000113877
												0.120479	0.000112992
												0.120489	0.000112041
												0.121361	9.20315e-05
												0.12135	9.07576e-05
												0.121317	8.95696e-05
												0.121266	8.85485e-05
												0.121198	8.77639e-05
												0.12112	8.72692e-05
												0.121036	8.70981e-05
												0.120952	8.72624e-05
												0.120874	8.77508e-05
												0.120807	8.853e-05
												0.120755	8.9547e-05
												0.120723	9.07323e-05
												0.120712	9.20054e-05
												0.120723	9.32793e-05
												0.120755	9.44673e-05
												0.120807	9.54884e-05
												0.120874	9.6273e-05
												0.120952	9.67677e-05
												0.121036	9.69387e-05
												0.12112	9.67745e-05
												0.121198	9.62861e-05
												0.121266	9.55068e-05
												0.121317	9.44899e-05
												0.12135	9.33045e-05
												0.121361	9.20315e-05
												0.120115	0.000157949
												0.120103	0.000155814
												0.120069	0.00015382
												0.120015	0.000152103
												0.119944	0.000150781
												0.119861	0.000149942
												0.119773	0.000149645
												0.119684	0.00014991
												0.119602	0.000150718
												0.119531	0.000152015
												0.119477	0.000153712
												0.119443	0.000155693
												0.119431	0.000157824
												0.119443	0.000159959
												0.119477	0.000161953
												0.119531	0.000163669
												0.119602	0.000164992
												0.119684	0.00016583
												0.119773	0.000166127
												0.119861	0.000165863
												0.119944	0.000165054
												0.120015	0.000163758
												0.120069	0.000162061
												0.120103	0.00016008
												0.120115	0.000157949
												0.118587	0.000165643
												0.118577	0.000164092
												0.118547	0.000162644
												0.118499	0.0001614
												0.118437	0.000160444
												0.118365	0.00015984
												0.118288	0.00015963
												0.11821	0.000159829
												0.118138	0.000160423
												0.118076	0.000161371
												0.118029	0.000162609
												0.117999	0.000164052
												0.117989	0.000165602
												0.117999	0.000167153
												0.118029	0.000168601
												0.118076	0.000169845
												0.118138	0.000170801
												0.11821	0.000171405
												0.118288	0.000171615
												0.118365	0.000171416
												0.118437	0.000170822
												0.118499	0.000169874
												0.118547	0.000168637
												0.118577	0.000167193
												0.118587	0.000165643
