# Supplementary material for: Exploring a link between the Middle Eocene Climatic Optimum and Neotethys continental arc flare-up
Source: Copernicus journal article supplement (doi:10.5194/cp-17-229-2021), 2021-01-18
Supplement: Supplementary file 14 [file S23_VU101C-A4a.xls]

## Sheet: Summary Table
	Relative Abundances			36Ar [fA]	%1s	37Ar [fA]	%1s	38Ar [fA]	%1s	39Ar [fA]	%1s	40Ar [fA]	%1s	40(r)/39(k)	± 1s	Age	± 1s	40Ar(r)	39Ar(k)	K/Ca	± 1s		Procedure Blanks		36Ar [fA]	1s	37Ar [fA]	1s	38Ar [fA]	1s	39Ar [fA]	1s	40Ar [fA]	1s		Sample Parameters		Sample	Material	Location	Analyst	Standard	%1s	J	%1s	MDF	%1s	Volume Ratio	Sensitivity
																(Ma)		(%)	(%)																							(in Ma)							(mol/volt)
	17_VU101C-A4	0	4	0.00124076	18.8065	0.570839	1.23572	0.00387317	3.6541	0.291286	4.73304	2.23812	0.965068	6.57414	0.399933	35.77	2.15492	85.4481	19.489	0.21913	0.0107324		17_VU101C-A4	0	0.0136407	0.0001701	0.0090099	9.24e-05	0.0069151	0.0001049	-0.0461085	0.0071761	4.14466	0.0184419		17_VU101C-A4	0	VU101C-A4_17	glass	X1.14B	K. Kuiper	28.201	0.08	0.003	0.2	0.983102	0.3	1	1e-13
	19_VU101C-A4	0	4	0.00121073	15.834	0.806693	1.12545	0.00386138	5.41385	0.286118	4.29337	2.59808	0.539732	8.05376	0.403247	43.7252	2.16335	88.5252	19.1322	0.152223	0.00676833		19_VU101C-A4	0	0.0131554	0.0001033	0.0088965	0.0001173	0.0068133	9.79e-05	-0.0439934	0.0087892	4.07636	0.0076251		19_VU101C-A4	0	VU101C-A4_19	glass	X1.14B	K. Kuiper	28.201	0.08	0.003	0.2	0.983102	0.3	1	1e-13
	20_VU101C-A4	0	4	0.0014429	11.4214	0.944993	1.1515	0.00463533	3.78206	0.353865	3.88421	3.21363	0.440786	8.0883	0.34652	43.9105	1.85883	88.9034	23.6647	0.16073	0.00652242		20_VU101C-A4	0	0.0131554	0.0001033	0.0088965	0.0001173	0.0068133	9.79e-05	-0.0439934	0.0087892	4.07636	0.0076251		20_VU101C-A4	0	VU101C-A4_20	glass	X1.14B	K. Kuiper	28.201	0.08	0.003	0.2	0.983102	0.3	1	1e-13
	21_VU101C-A4	0	4	0.0013999	13.7775	0.892093	1.10397	0.00452779	3.44788	0.341571	3.63886	3.0911	0.45948	8.04521	0.340986	43.6793	1.82938	88.7444	22.8434	0.164352	0.0062598		21_VU101C-A4	0	0.0131554	0.0001033	0.0088965	0.0001173	0.0068133	9.79e-05	-0.0439934	0.0087892	4.07636	0.0076251		21_VU101C-A4	0	VU101C-A4_21	glass	X1.14B	K. Kuiper	28.201	0.08	0.003	0.2	0.983102	0.3	1	1e-13
	23_VU101C-A4	0	4	0.00519681	3.90061	0.696981	1.135	0.00392875	3.85863	0.222437	8.02424	3.32096	0.450582	8.21815	0.718089	44.6069	3.85057	54.9288	14.8708	0.136942	0.0111209		23_VU101C-A4	0	0.0131436	0.0001274	0.0089305	0.0001096	0.0070272	8.81e-05	-0.0518518	0.0083395	4.11025	0.006996		23_VU101C-A4	0	VU101C-A4_23	glass	X1.14B	K. Kuiper	28.201	0.08	0.003	0.2	0.983102	0.3	1	1e-13
			S	0.0104911	4.22693	3.9116	0.517757	0.0208264	1.80822	1.49528	2.11797	14.4619	0.248301
	Information on Analysis and Constants Used in Calculations									Results		40(a)/36(a)	± 1s	40(r)/39(k)	± 1s	Age	± 1s	MSWD	39Ar(k)	K/Ca	± 1s
																(Ma)			(%,n)
	Sample = VU101C-A4_17				Age Equations = Min et al. (2000)					Age Plateau Error Mean				7.77497	0.300838	42.2289	1.61742	2.83003	100	0.163257	0.0100697
	Material = glass				Negative Intensities = Allowed										0.0386932		0.0383013	0.0231924	5
	Location = X1.14B				Decay Constant 40K = 5.460 ± 0.053 E-10 1/a					Full External Error							1.67576	1.70711	1σ Confidence Limit
	Analyst = K. Kuiper				Decay Constant 39Ar = 2.940 ± 0.016 E-07 1/h					Analytical Error							1.61527	1.68227	Error Magnification
	Project = VU101				Decay Constant 37Ar = 8.230 ± 0.012 E-04 1/h
	Mass Discrimination Law = LIN				Decay Constant 36Cl = 2.257 ± 0.015 E-06 1/a					Total Fusion Age				7.79606	0.189234	42.3422	1.01942		5	0.164086	0.00358358
	Irradiation = VU101				Decay Activity 40K(EC,β⁺) = 3.310 ± 0.030 1/gs										0.024273		0.0240757
	J = 0.00300000 ± 0.00000600				Decay Activity 40K(β⁻) = 27.890 ± 0.150 1/gs					Full External Error							1.11011
	FCs = 28.201 ± 0.023 Ma				Atmospheric Ratio 40/36(a) = 298.56 ± 0.31					Analytical Error							1.01598
	IGSN = Undefined				Atmospheric Ratio 38/36(a) = 0.1885 ± 0.0003
	Preferred Age = Undefined				Production Ratio 39/37(ca) = 0.000673 ± 0.000004					Normal Isochron No Convergence		321.079	74.7574	7.60889	0.519354	41.337	2.79108	4.04051	100
	Classification = Undefined				Production Ratio 36/37(ca) = 0.000264 ± 0.000002								0.232831		0.0682563		0.0675202	0.00697823	5
	Experiment Type = Undefined				Production Ratio 40/39(k) = 0.000860 ± 0.000070					Full External Error							2.82388	1.8165	1σ Confidence Limit
	Extraction Method = Undefined				Production Ratio 38/39(k) = 0.012110 ± 0.000030					Analytical Error							2.78988	2.0101	Error Magnification
	Heating = 45 sec				Production Ratio 36/38(cl) = 262.80 ± 1.71												100		Number of Iterations
	Isolation = 5.00 min				Scaling Ratio K/Ca = 0.430												0.000179485		Convergence
	Instrument = HELIX-MC				Abundance Ratio 40K/K = 1.1700 ± 0.0100 E-04
	Lithology = Undefined				Atomic Weight K = 39.0983 ± 0.0001 g					Inverse Isochron Error Chron		323.987	62.4669	7.74508	0.43789	42.0684	2.3528	2.97883	100
	Lat-Lon = Undefined - Undefined												0.192807		0.0565379		0.055928	0.0301473	5
	Feature = Undefined									Full External Error							2.39298	1.8165	1σ Confidence Limit
										Analytical Error							2.35133	1.72593	Error Magnification
																	3		Number of Iterations
																	5.75724e-05		Convergence
																	0.48903		Spreading Factor
[truncated: 39 more columns]

## Sheet: Hidden Data
Double Line Plot Age Plateau			Double Line Plot K/Ca Plateau			X-Y Plot Normal Isochron		X-Y Plot Inverse Isochron		Error Ellipses Normal Isochron		Error Ellipses Inverse Isochron
Ar39k%	Line 1	Line 2	Ar39k%	Line 1	Line 2	X-axis	Y-axis	X-axis	Y-axis	X-axis	Y-axis	X-axis	Y-axis
0	33.6151	37.9249	0	0.208397	0.229862	266.876	2053.04	0.129991	0.000487082			0.136278	0.000488021
19.489	33.6151	37.9249	19.489	0.208397	0.229862	286.228	2603.78	0.109928	0.000384058			0.136064	0.000460974
19.489	45.8886	41.5619	19.489	0.158991	0.145455	295.986	2692.59	0.109926	0.00037139			0.135436	0.000435707
38.6212	45.8886	41.5619	38.6212	0.158991	0.145455	292.842	2654.54	0.110318	0.000376714			0.134436	0.000413941
38.6212	42.0516	45.7693	38.6212	0.154207	0.167252	44.2807	662.465	0.0668422	0.00150951			0.133134	0.000397159
62.2859	42.0516	45.7693	62.2859	0.154207	0.167252							0.131618	0.000386506
62.2859	45.5087	41.8499	62.2859	0.170612	0.158092							0.129991	0.000382706
85.1292	45.5087	41.8499	85.1292	0.170612	0.158092							0.128364	0.00038602
85.1292	40.7563	48.4575	85.1292	0.125821	0.148063							0.126847	0.000396221
100	40.7563	48.4575	100	0.125821	0.148063							0.125545	0.000412614
												0.124546	0.000434082
												0.123918	0.000459161
												0.123704	0.000486144
												0.123918	0.00051319
												0.124546	0.000538458
												0.125545	0.000560224
												0.126847	0.000577005
												0.128363	0.000587659
												0.129991	0.000591458
												0.131618	0.000588145
												0.133134	0.000577944
												0.134436	0.000561551
												0.135435	0.000540083
												0.136064	0.000515003
												0.136278	0.000488021
												0.114694	0.000384316
												0.114531	0.000365198
												0.114055	0.000347366
												0.113298	0.000332034
												0.112311	0.000320247
												0.111162	0.000312809
												0.109928	0.000310226
												0.108695	0.000312675
												0.107545	0.000319989
												0.106558	0.000331668
												0.105801	0.000346918
												0.105325	0.000364699
												0.105163	0.0003838
												0.105325	0.000402917
												0.105801	0.00042075
												0.106558	0.000436082
												0.107545	0.000447869
												0.108695	0.000455307
												0.109928	0.000457889
												0.111162	0.00045544
												0.112311	0.000448127
												0.113298	0.000436447
												0.114055	0.000421197
												0.114531	0.000403416
												0.114694	0.000384316
												0.114231	0.000371574
												0.114085	0.000358285
												0.113655	0.000345888
												0.11297	0.00033523
												0.112079	0.000327036
												0.111041	0.000321864
												0.109926	0.000320067
												0.108812	0.000321769
												0.107774	0.000326851
												0.106882	0.000334969
												0.106198	0.000345569
												0.105768	0.000357929
												0.105622	0.000371206
												0.105768	0.000384495
												0.106198	0.000396892
												0.106882	0.00040755
												0.107774	0.000415744
												0.108812	0.000420916
												0.109926	0.000422713
												0.111041	0.000421011
												0.112079	0.000415929
												0.11297	0.000407811
												0.113654	0.000397211
												0.114085	0.000384851
												0.114231	0.000371574
												0.114371	0.00037693
												0.114233	0.000360764
												0.113828	0.000345685
												0.113184	0.00033272
												0.112344	0.000322754
												0.111367	0.000316464
												0.110318	0.000314281
												0.109269	0.000316352
												0.108291	0.000322537
												0.107452	0.000332414
												0.106807	0.00034531
												0.106402	0.000360346
												0.106264	0.000376497
												0.106402	0.000392663
												0.106807	0.000407743
												0.107452	0.000420707
												0.108291	0.000430674
												0.109269	0.000436963
												0.110318	0.000439147
												0.111367	0.000437075
												0.112344	0.000430891
												0.113184	0.000421014
												0.113828	0.000408118
												0.114233	0.000393082
												0.114371	0.00037693
												0.0722256	0.00150989
												0.0720422	0.00149398
												0.0715044	0.00147913
												0.0706488	0.00146635
												0.0695339	0.00145651
												0.0682356	0.00145028
												0.0668422	0.00144809
												0.0654489	0.00145008
												0.0641506	0.00145613
												0.0630356	0.00146581
												0.0621801	0.00147847
												0.0616423	0.00149325
												0.0614589	0.00150913
												0.0616423	0.00152504
												0.0621801	0.0015399
												0.0630356	0.00155268
												0.0641506	0.00156252
												0.0654489	0.00156874
												0.0668422	0.00157094
												0.0682355	0.00156894
												0.0695339	0.0015629
												0.0706488	0.00155322
												0.0715043	0.00154055
												0.0720421	0.00152578
												0.0722256	0.00150989
