# Supplementary material for: Exploring a link between the Middle Eocene Climatic Optimum and Neotethys continental arc flare-up
Source: Copernicus journal article supplement (doi:10.5194/cp-17-229-2021), 2021-01-18
Supplement: Supplementary file 15 [file S24_VU107-A1_1.xls]

## Sheet: Summary Table
	Relative Abundances			36Ar [fA]	%1s	37Ar [fA]	%1s	38Ar [fA]	%1s	39Ar [fA]	%1s	40Ar [fA]	%1s	40(r)/39(k)	± 2s	Age	± 2s	40Ar(r)	39Ar(k)	K/Ca	± 2s		Procedure Blanks		36Ar [fA]	1s	37Ar [fA]	1s	38Ar [fA]	1s	39Ar [fA]	1s	40Ar [fA]	1s		Sample Parameters		Sample	Material	Location	Analyst	Standard	%1s	J	%1s	MDF	%1s	Volume Ratio	Sensitivity
																(Ma)		(%)	(%)																							(in Ma)							(mol/volt)
	011_VU107-A1	10		0.0143804	1.83684	0.268578	9.79857	0.00580885	3.29628	0.233509	0.436822	5.35306	0.187551	4.63139	0.683939	40.0645	5.85223	20.1872	1.79643	0.373564	0.0732808		011_VU107-A1	10	0.0088116	9.88e-05	0.01297	0.0001329	0.0057573	7.57e-05	0.0105262	0.0001408	2.55123	0.0046927		011_VU107-A1	10	011_VU107-A1	groundmass	IR22	Klaudia Kuiper	28.201	0.08	0.0047753	0.1	0.986385	0.1	1	1e-13
	012_VU107-A1	11.3		0.031407	1.08079	0.721881	3.45596	0.014724	1.54953	0.653073	0.397325	12.4931	0.282993	4.86164	0.332601	42.0336	2.84289	25.3952	5.02438	0.388724	0.0270455		012_VU107-A1	11.3	0.0088116	9.88e-05	0.01297	0.0001329	0.0057573	7.57e-05	0.0105262	0.0001408	2.55123	0.0046927		012_VU107-A1	11.3	012_VU107-A1	groundmass	IR22	Klaudia Kuiper	28.201	0.08	0.0047753	0.1	0.986385	0.1	1	1e-13
	013_VU107-A1	12.5		0.0362048	0.799338	1.20479	1.99203	0.0191501	1.33368	0.937762	0.245462	15.7896	0.105263	5.41609	0.191224	46.7666	1.63026	32.1389	7.21374	0.334407	0.0134239		013_VU107-A1	12.5	0.0088116	9.88e-05	0.01297	0.0001329	0.0057573	7.57e-05	0.0105262	0.0001408	2.55123	0.0046927		013_VU107-A1	12.5	013_VU107-A1	groundmass	IR22	Klaudia Kuiper	28.201	0.08	0.0047753	0.1	0.986385	0.1	1	1e-13
	014_VU107-A1	13.7		0.0407436	0.974736	2.4878	1.73686	0.0275306	0.772431	1.49209	0.125919	20.5946	0.057218	5.78709	0.1615	49.9268	1.37447	41.8808	11.475	0.257609	0.00897216		014_VU107-A1	13.7	0.0088116	9.88e-05	0.01297	0.0001329	0.0057573	7.57e-05	0.0105262	0.0001408	2.55123	0.0046927		014_VU107-A1	13.7	014_VU107-A1	groundmass	IR22	Klaudia Kuiper	28.201	0.08	0.0047753	0.1	0.986385	0.1	1	1e-13
	016_VU107-A1	15		0.0249582	1.07147	2.47	1.33163	0.0182307	0.935756	1.07425	0.137792	13.6007	0.210469	5.91377	0.159706	51.0046	1.35841	46.6375	8.25803	0.186726	0.00499962		016_VU107-A1	15	0.0085921	0.0001448	0.0127685	8.63e-05	0.0058262	6.81e-05	0.0120582	0.0002217	2.50665	0.006793		016_VU107-A1	15	016_VU107-A1	groundmass	IR22	Klaudia Kuiper	28.201	0.08	0.0047753	0.1	0.986385	0.1	1	1e-13
	017_VU107-A1	16		0.0187538	1.51095	2.56382	1.36815	0.016997	1.23182	1.07103	0.150439	11.5812	0.191996	5.78253	0.164967	49.888	1.40401	53.3908	8.23278	0.179343	0.00493703		017_VU107-A1	16	0.0085921	0.0001448	0.0127685	8.63e-05	0.0058262	6.81e-05	0.0120582	0.0002217	2.50665	0.006793		017_VU107-A1	16	017_VU107-A1	groundmass	IR22	Klaudia Kuiper	28.201	0.08	0.0047753	0.1	0.986385	0.1	1	1e-13
	018_VU107-A1	17		0.0108715	2.67235	1.56473	1.59658	0.0106805	2.03725	0.716155	0.283625	7.09313	0.206106	5.55173	0.248264	47.9227	2.1152	55.9705	5.50569	0.196516	0.0063736		018_VU107-A1	17	0.0085921	0.0001448	0.0127685	8.63e-05	0.0058262	6.81e-05	0.0120582	0.0002217	2.50665	0.006793		018_VU107-A1	17	018_VU107-A1	groundmass	IR22	Klaudia Kuiper	28.201	0.08	0.0047753	0.1	0.986385	0.1	1	1e-13
	019_VU107-A1	18		0.00973858	2.41438	1.94897	1.8387	0.0146814	1.76724	1.07103	0.156905	9.54951	0.139044	6.35182	0.13528	54.7267	1.14831	71.1519	8.23595	0.236011	0.00871072		019_VU107-A1	18	0.0085921	0.0001448	0.0127685	8.63e-05	0.0058262	6.81e-05	0.0120582	0.0002217	2.50665	0.006793		019_VU107-A1	18	019_VU107-A1	groundmass	IR22	Klaudia Kuiper	28.201	0.08	0.0047753	0.1	0.986385	0.1	1	1e-13
	021_VU107-A1	19		0.00483159	4.8855	1.20493	3.17762	0.00635543	2.5106	0.447369	0.240308	3.55374	0.218049	4.93961	0.318786	42.6999	2.72381	62.0704	3.43812	0.159362	0.0101569		021_VU107-A1	19	0.0085423	0.0001062	0.0131621	0.0001399	0.0059521	9.41e-05	0.0168416	0.0001473	2.57459	0.0041052		021_VU107-A1	19	021_VU107-A1	groundmass	IR22	Klaudia Kuiper	28.201	0.08	0.0047753	0.1	0.986385	0.1	1	1e-13
	022_VU107-A1	20		0.00468734	4.04379	1.46667	2.34161	0.00632109	2.58113	0.414849	0.233786	3.26223	0.293693	4.77956	0.278678	41.3319	2.3829	60.6358	3.18639	0.121336	0.00571084		022_VU107-A1	20	0.0085423	0.0001062	0.0131621	0.0001399	0.0059521	9.41e-05	0.0168416	0.0001473	2.57459	0.0041052		022_VU107-A1	20	022_VU107-A1	groundmass	IR22	Klaudia Kuiper	28.201	0.08	0.0047753	0.1	0.986385	0.1	1	1e-13
	023_VU107-A1	21		0.00347204	5.72046	1.69392	2.15922	0.00467179	3.61765	0.333456	0.299195	2.69215	0.307178	5.38276	0.362281	46.4824	3.08906	66.4441	2.55856	0.0843582	0.00367802		023_VU107-A1	21	0.0085423	0.0001062	0.0131621	0.0001399	0.0059521	9.41e-05	0.0168416	0.0001473	2.57459	0.0041052		023_VU107-A1	21	023_VU107-A1	groundmass	IR22	Klaudia Kuiper	28.201	0.08	0.0047753	0.1	0.986385	0.1	1	1e-13
	024_VU107-A1	22	4	0.00435105	5.4043	1.78112	2.21035	0.00362006	4.13944	0.230675	0.249574	2.05357	0.369441	3.89895	0.616474	33.7865	5.29308	43.569	1.76678	0.0554004	0.00246484		024_VU107-A1	22	0.0085423	0.0001062	0.0131621	0.0001399	0.0059521	9.41e-05	0.0168416	0.0001473	2.57459	0.0041052		024_VU107-A1	22	024_VU107-A1	groundmass	IR22	Klaudia Kuiper	28.201	0.08	0.0047753	0.1	0.986385	0.1	1	1e-13
	026_VU107-A1	23.5	4	0.00459904	4.24209	1.42821	2.17832	0.0038088	3.85647	0.216423	0.269724	2.24292	0.336335	4.55887	0.546404	39.4439	4.67697	43.794	1.65888	0.0648704	0.00284797		026_VU107-A1	23.5	0.0087036	8.03e-05	0.0133862	0.000138	0.0059896	9.64e-05	0.0137067	0.0001186	2.53239	0.0048961		026_VU107-A1	23.5	026_VU107-A1	groundmass	IR22	Klaudia Kuiper	28.201	0.08	0.0047753	0.1	0.986385	0.1	1	1e-13
	027_VU107-A1	25	4	0.00734637	2.60668	2.06308	1.71617	0.00550878	3.6915	0.263582	0.306793	3.00321	0.260588	3.70867	0.441653	32.152	3.79544	32.3783	2.01868	0.054648	0.00190578		027_VU107-A1	25	0.0087036	8.03e-05	0.0133862	0.000138	0.0059896	9.64e-05	0.0137067	0.0001186	2.53239	0.0048961		027_VU107-A1	25	027_VU107-A1	groundmass	IR22	Klaudia Kuiper	28.201	0.08	0.0047753	0.1	0.986385	0.1	1	1e-13
	028_VU107-A1	27	4	0.00712809	2.43296	2.04551	1.79877	0.00519442	2.74214	0.237264	0.367045	3.01071	0.26522	4.42454	0.446491	38.2937	3.82417	34.6661	1.81614	0.0495875	0.00182115		028_VU107-A1	27	0.0087036	8.03e-05	0.0133862	0.000138	0.0059896	9.64e-05	0.0137067	0.0001186	2.53239	0.0048961		028_VU107-A1	27	028_VU107-A1	groundmass	IR22	Klaudia Kuiper	28.201	0.08	0.0047753	0.1	0.986385	0.1	1	1e-13
	029_VU107-A1	29.5	4	0.00853914	2.09458	2.46465	1.6723	0.00592655	3.15204	0.251701	0.371737	3.43269	0.247032	4.30911	0.435016	37.3048	3.7279	31.3881	1.92512	0.0436241	0.00149517		029_VU107-A1	29.5	0.0087036	8.03e-05	0.0133862	0.000138	0.0059896	9.64e-05	0.0137067	0.0001186	2.53239	0.0048961		029_VU107-A1	29.5	029_VU107-A1	groundmass	IR22	Klaudia Kuiper	28.201	0.08	0.0047753	0.1	0.986385	0.1	1	1e-13
	031_VU107-A1	35	4	0.012642	1.96479	3.49574	1.47308	0.00812511	1.96848	0.358185	0.369308	4.88824	0.215859	3.90424	0.423245	33.8319	3.63391	28.4204	2.73962	0.0437699	0.00132999		031_VU107-A1	35	0.0083796	0.0001173	0.0135848	0.0001175	0.0058084	6.68e-05	0.0135664	0.0002738	2.4897	0.0051608		031_VU107-A1	35	031_VU107-A1	groundmass	IR22	Klaudia Kuiper	28.201	0.08	0.0047753	0.1	0.986385	0.1	1	1e-13
	032_VU107-A1	50	4	0.0325251	1.20769	6.34607	1.0263	0.0208678	1.07993	0.874578	0.34656	12.8004	0.332005	4.12457	0.289263	35.7226	2.481	28.0432	6.70064	0.0589707	0.00127824		032_VU107-A1	50	0.0083796	0.0001173	0.0135848	0.0001175	0.0058084	6.68e-05	0.0135664	0.0002738	2.4897	0.0051608		032_VU107-A1	50	032_VU107-A1	groundmass	IR22	Klaudia Kuiper	28.201	0.08	0.0047753	0.1	0.986385	0.1	1	1e-13
	033_VU107-A1	80	4	0.0392137	0.768628	6.7087	0.999117	0.0235686	1.035	1.05434	0.148832	15.4807	0.0685008	4.09725	0.174876	35.4883	1.5001	27.7855	8.08278	0.0672895	0.00135958		033_VU107-A1	80	0.0083796	0.0001173	0.0135848	0.0001175	0.0058084	6.68e-05	0.0135664	0.0002738	2.4897	0.0051608		033_VU107-A1	80	033_VU107-A1	groundmass	IR22	Klaudia Kuiper	28.201	0.08	0.0047753	0.1	0.986385	0.1	1	1e-13
	034_VU107-A1	16	4	0.0432252	0.891661	5.73403	1.00353	0.0259661	1.2206	1.09051	0.162673	17.1227	0.0695349	4.29662	0.214939	37.1977	1.84204	27.2676	8.36632	0.0814891	0.00165704		034_VU107-A1	16	0.0083796	0.0001173	0.0135848	0.0001175	0.0058084	6.68e-05	0.0135664	0.0002738	2.4897	0.0051608		034_VU107-A1	16	034_VU107-A1	groundmass	IR22	Klaudia Kuiper	28.201	0.08	0.0047753	0.1	0.986385	0.1	1	1e-13
			S	0.359619	0.340175	49.6632	0.36845	0.247738	0.370901	13.0218	0.0548078	169.598	0.046326
	Information on Analysis and Constants Used in Calculations									Results		40(a)/36(a)	± 2s	40(r)/39(k)	± 2s	Age	± 2s	MSWD	39Ar(k)	K/Ca	± 2s
																(Ma)			(%,n)
	Sample = 011_VU107-A1				Age Equations = Min et al. (2000)					Age Plateau				4.15469	0.129633	35.981	1.11398	1.56766	35.075	0.0570157	0.00843632
	Material = groundmass				Negative Intensities = Allowed										0.0312016		0.0309604	0.128639	9
	Location = IR22				Decay Constant 40K = 5.460 ± 0.053 E-10 1/a					Full External Error							1.34175	2	2σ Confidence Limit
	Analyst = Klaudia Kuiper				Decay Constant 39Ar = 2.940 ± 0.016 E-07 1/h					Analytical Error							1.1117	1.25206	Error Magnification
	Project = VU107				Decay Constant 37Ar = 8.230 ± 0.012 E-04 1/h
	Mass Discrimination Law = LIN				Decay Constant 36Cl = 2.257 ± 0.015 E-06 1/a					Total Fusion Age				5.09196	0.0580413	44.0012	0.503143		20	0.112458	0.000837871
	Irradiation = VU107				Decay Activity 40K(EC,β⁺) = 3.310 ± 0.030 1/gs										0.0113986		0.0114347
	J = 0.00477530 ± 0.00000478				Decay Activity 40K(β⁻) = 27.890 ± 0.150 1/gs					Full External Error							1.04249
	FCs = 28.201 ± 0.023 Ma				Atmospheric Ratio 40/36(a) = 298.56 ± 0.31					Analytical Error							0.495572
	IGSN = Undefined				Atmospheric Ratio 38/36(a) = 0.1885 ± 0.0003
	Preferred Age = Undefined				Production Ratio 39/37(ca) = 0.000673 ± 0.000004					Normal Isochron		310.518	26.6684	3.73796	0.914185	32.4037	7.85543	1.62308	35.075
	Classification = Undefined				Production Ratio 36/37(ca) = 0.000264 ± 0.000002								0.0858834		0.244568		0.242424	0.123607	9
	Experiment Type = Undefined				Production Ratio 40/39(k) = 0.000860 ± 0.000070					Full External Error							7.8843	2.06904	2σ Confidence Limit
	Extraction Method = Undefined				Production Ratio 38/39(k) = 0.012110 ± 0.000030					Analytical Error							7.85517	1.274	Error Magnification
	Heating = 720 sec				Production Ratio 36/38(cl) = 262.80 ± 1.71												13		Number of Iterations
	Isolation = 18.00 min				Scaling Ratio K/Ca = 0.430												3.73681e-05		Convergence
	Instrument = HELIX				Abundance Ratio 40K/K = 1.1700 ± 0.0100 E-04
	Lithology = Undefined				Atomic Weight K = 39.0983 ± 0.0001 g					Inverse Isochron		306.937	26.6168	3.87148	0.839741	33.5506	7.21129	1.69578	35.075
	Lat-Lon = Undefined - Undefined												0.0867177		0.216904		0.214938	0.104901	9
	Feature = Undefined									Full External Error							7.24496	2.06904	2σ Confidence Limit
										Analytical Error							7.21098	1.30222	Error Magnification
																	3		Number of Iterations
																	0.000115067		Convergence
																	0.18695		Spreading Factor
[truncated: 39 more columns]

## Sheet: Hidden Data
Double Line Plot Age Plateau			Double Line Plot K/Ca Plateau			X-Y Plot Normal Isochron		X-Y Plot Inverse Isochron		Error Ellipses Normal Isochron		Error Ellipses Inverse Isochron
Ar39k%	Line 1	Line 2	Ar39k%	Line 1	Line 2	X-axis	Y-axis	X-axis	Y-axis	X-axis	Y-axis	X-axis	Y-axis
0	34.2123	45.9167	0	0.300284	0.446845	16.3059	374.079	0.0435895	0.00267323	16.9051	387.966	0.0440042	0.00267742
1.79643	34.2123	45.9167	1.79643	0.300284	0.446845	20.9055	400.195	0.0522382	0.00249878	16.9247	387.491	0.0439904	0.00265162
1.79643	44.8765	39.1907	1.79643	0.41577	0.361679	26.1089	439.968	0.0593426	0.00227289	16.9022	386.102	0.0439492	0.00262729
6.82081	44.8765	39.1907	6.82081	0.41577	0.361679	37.1803	513.726	0.0723739	0.00194656	16.839	383.894	0.0438835	0.00260609
6.82081	45.1364	48.3969	6.82081	0.320983	0.347831	44.1288	559.528	0.078868	0.00178722	16.7395	381.017	0.0437977	0.00258946
14.0346	45.1364	48.3969	14.0346	0.320983	0.347831	59.1539	640.619	0.0923386	0.00156099	16.6105	377.667	0.0436978	0.00257855
14.0346	51.3013	48.5523	14.0346	0.266581	0.248637	68.3759	678.165	0.100825	0.00147457	16.4606	374.072	0.0435905	0.00257409
25.5095	51.3013	48.5523	25.5095	0.266581	0.248637	115.971	1035.18	0.112029	0.000966011	16.3003	370.478	0.0434831	0.00257638
25.5095	49.6462	52.363	25.5095	0.181726	0.191725	98.9393	787.282	0.125672	0.00127019	16.1403	367.13	0.043383	0.00258527
33.7675	49.6462	52.363	33.7675	0.181726	0.191725	96.2481	758.584	0.126879	0.00131825	15.9916	364.255	0.0432969	0.00260016
33.7675	51.292	48.484	33.7675	0.18428	0.174406	109.863	889.926	0.123452	0.00112369	15.8644	362.05	0.0432308	0.00262003
42.0003	51.292	48.484	42.0003	0.18428	0.174406	59.1313	529.11	0.111756	0.00188997	15.7672	360.664	0.0431891	0.00264352
42.0003	45.8074	50.0379	42.0003	0.190142	0.20289	51.0352	531.223	0.0960711	0.00188245	15.7067	360.192	0.0431747	0.00266904
47.506	45.8074	50.0379	47.506	0.190142	0.20289	38.5505	441.531	0.087311	0.00226485	15.6871	360.667	0.0431886	0.00269484
47.506	55.875	53.5784	47.506	0.244722	0.227301	35.8076	456.992	0.0783549	0.00218822	15.7096	362.056	0.0432298	0.00271917
55.742	55.875	53.5784	55.742	0.244722	0.227301	31.6993	435.156	0.0728459	0.00229803	15.7728	364.264	0.0432955	0.00274037
55.742	39.9761	45.4237	55.742	0.149205	0.169519	30.365	417.112	0.0727982	0.00239744	15.8723	367.141	0.0433812	0.002757
59.1801	39.9761	45.4237	59.1801	0.149205	0.169519	28.2127	414.925	0.0679947	0.00241007	16.0014	370.491	0.0434812	0.00276792
59.1801	43.7148	38.949	59.1801	0.127047	0.115625	28.0393	413.444	0.0678189	0.00241871	16.1512	374.086	0.0435885	0.00277238
62.3665	43.7148	38.949	62.3665	0.127047	0.115625	26.0529	410.499	0.0634663	0.00243606	16.3115	377.68	0.0436959	0.00277009
62.3665	43.3934	49.5715	62.3665	0.0806802	0.0880362					16.4715	381.028	0.043796	0.00276119
64.925	43.3934	49.5715	64.925	0.0806802	0.0880362					16.6202	383.903	0.043882	0.0027463
64.925	39.0796	28.4935	64.925	0.0578653	0.0529356					16.7475	386.108	0.0439482	0.00272644
66.6918	39.0796	28.4935	66.6918	0.0578653	0.0529356					16.8446	387.494	0.0439898	0.00270294
66.6918	34.7669	44.1209	66.6918	0.0620224	0.0677184					16.9051	387.966	0.0440042	0.00267743
68.3507	34.7669	44.1209	68.3507	0.0620224	0.0677184
68.3507	35.9475	28.3566	68.3507	0.0565538	0.0527422					21.3458	409.19	0.0527482	0.00250708
70.3694	35.9475	28.3566	70.3694	0.0565538	0.0527422					21.3829	408.881	0.052731	0.00249242
70.3694	34.4695	42.1179	70.3694	0.0477663	0.0514086					21.3875	407.98	0.0526803	0.0024782
72.1855	34.4695	42.1179	72.1855	0.0477663	0.0514086					21.3592	406.548	0.0525994	0.00246537
72.1855	41.0327	33.5769	72.1855	0.0451192	0.0421289					21.3	404.684	0.052494	0.00245483
74.1106	41.0327	33.5769	74.1106	0.0451192	0.0421289					21.214	402.513	0.0523711	0.00244728
74.1106	30.198	37.4659	74.1106	0.0424399	0.0450999					21.1069	400.185	0.0522392	0.00244324
76.8503	30.198	37.4659	76.8503	0.0424399	0.0450999					20.986	397.857	0.0521071	0.00244298
76.8503	38.2036	33.2416	76.8503	0.0602489	0.0576924					20.8597	395.689	0.0519841	0.00244653
83.5509	38.2036	33.2416	83.5509	0.0602489	0.0576924					20.7365	393.827	0.0518783	0.00245364
83.5509	33.9882	36.9884	83.5509	0.0659299	0.068649					20.6249	392.4	0.0517971	0.00246382
91.6337	33.9882	36.9884	91.6337	0.0659299	0.068649					20.5323	391.504	0.0517459	0.00247639
91.6337	39.0397	35.3557	91.6337	0.0831461	0.079832					20.4652	391.2	0.0517283	0.00249048
100	39.0397	35.3557	100	0.0831461	0.079832					20.428	391.509	0.0517455	0.00250514
										20.4235	392.41	0.0517962	0.00251937
										20.4517	393.841	0.051877	0.00253219
										20.5109	395.706	0.0519825	0.00254274
										20.597	397.876	0.0521054	0.00255029
										20.7041	400.205	0.0522373	0.00255433
										20.8249	402.532	0.0523693	0.00255459
										20.9512	404.701	0.0524924	0.00255104
										21.0744	406.562	0.0525982	0.00254393
										21.1861	407.99	0.0526794	0.00253374
										21.2787	408.886	0.0527305	0.00252118
										21.3458	409.19	0.0527482	0.00250708
										26.5267	447.126	0.0596599	0.0022748
										26.5484	446.88	0.0596491	0.00226518
										26.5402	446.163	0.0596175	0.00225608
										26.5025	445.024	0.0595671	0.00224813
										26.4381	443.54	0.0595014	0.00224187
										26.3512	441.813	0.059425	0.00223772
										26.2478	439.96	0.0593429	0.00223596
										26.1349	438.108	0.0592608	0.00223673
										26.0203	436.382	0.0591842	0.00223995
										25.9116	434.901	0.0591185	0.00224543
										25.8165	433.765	0.059068	0.00225277
										25.7412	433.052	0.0590363	0.00226149
										25.691	432.81	0.0590254	0.00227098
										25.6693	433.056	0.0590362	0.0022806
										25.6776	433.773	0.0590678	0.0022897
										25.7152	434.912	0.0591182	0.00229765
										25.7796	436.396	0.0591838	0.00230392
										25.8665	438.123	0.0592603	0.00230807
										25.97	439.976	0.0593424	0.00230982
										26.0828	441.829	0.0594245	0.00230906
										26.1975	443.554	0.0595011	0.00230583
										26.3061	445.035	0.0595668	0.00230036
										26.4013	446.171	0.0596173	0.00229301
										26.4765	446.884	0.059649	0.0022843
										26.5267	447.126	0.0596599	0.0022748
										37.9163	523.927	0.0725743	0.00194752
										37.9177	523.578	0.0725675	0.00193749
										37.8689	522.557	0.0725475	0.00192807
										37.7731	520.934	0.0725157	0.00191992
										37.637	518.82	0.0724742	0.00191358
										37.4697	516.359	0.0724259	0.00190949
										37.2827	513.719	0.0723741	0.00190792
										37.0888	511.079	0.0723222	0.00190899
										36.9011	508.619	0.0722738	0.00191262
										36.7324	506.508	0.0722323	0.00191856
										36.5942	504.888	0.0722004	0.00192641
										36.496	503.871	0.0721803	0.00193564
										36.4444	503.525	0.0721735	0.00194561
										36.443	503.875	0.0721803	0.00195564
										36.4918	504.895	0.0722002	0.00196505
										36.5876	506.518	0.072232	0.00197321
										36.7237	508.632	0.0722735	0.00197955
										36.891	511.093	0.0723218	0.00198364
										37.078	513.733	0.0723737	0.0019852
										37.2719	516.373	0.0724256	0.00198413
										37.4596	518.833	0.0724739	0.0019805
										37.6283	520.944	0.0725155	0.00197456
										37.7665	522.564	0.0725474	0.00196671
										37.8647	523.581	0.0725674	0.00195749
										37.9163	523.927	0.0725743	0.00194752
										45.0835	572.071	0.079265	0.00179358
										45.1074	571.639	0.0792516	0.00178312
										45.0646	570.382	0.0792121	0.00177295
										44.9581	568.385	0.0791491	0.00176374
										44.795	565.785	0.079067	0.00175614
										44.5866	562.758	0.0789713	0.00175066
										44.3469	559.511	0.0788686	0.00174766
										44.0924	556.265	0.0787658	0.00174737
										43.8404	553.242	0.07867	0.00174979
										43.608	550.647	0.0785877	0.00175476
										43.4111	548.657	0.0785244	0.00176194
										43.2631	547.408	0.0784846	0.00177085
										43.1741	546.984	0.0784709	0.00178087
										43.1502	547.416	0.0784843	0.00179132
										43.193	548.673	0.0785238	0.0018015
										43.2995	550.67	0.0785868	0.0018107
										43.4626	553.27	0.0786689	0.0018183
										43.671	556.297	0.0787646	0.00182379
										43.9107	559.544	0.0788673	0.00182678
										44.1652	562.79	0.0789701	0.00182708
										44.4172	565.814	0.0790659	0.00182466
										44.6496	568.409	0.0791482	0.00181969
										44.8465	570.399	0.0792115	0.0018125
										44.9945	571.648	0.0792513	0.0018036
										45.0835	572.071	0.079265	0.00179358
										60.9962	660.866	0.0927894	0.00156576
										61.0072	660.17	0.0927741	0.00155289
										60.8919	658.141	0.0927292	0.00154057
										60.6582	654.918	0.0926577	0.00152964
										60.3219	650.72	0.0925644	0.00152085
										59.9061	645.834	0.0924558	0.00151479
										59.439	640.593	0.0923391	0.00151189
										58.9524	635.354	0.0922224	0.00151232
										58.4796	630.473	0.0921137	0.00151608
										58.0527	626.284	0.0920202	0.00152289
										57.7009	623.072	0.0919485	0.0015323
										57.4481	621.055	0.0919033	0.00154367
										57.3115	620.372	0.0918878	0.00155622
										57.3005	621.069	0.091903	0.00156909
										57.4158	623.098	0.091948	0.00158141
										57.6495	626.321	0.0920195	0.00159234
										57.9858	630.518	0.0921128	0.00160113
										58.4017	635.404	0.0922214	0.00160719
										58.8688	640.645	0.0923381	0.00161009
										59.3553	645.884	0.0924548	0.00160966
										59.8281	650.765	0.0925635	0.0016059
										60.255	654.954	0.092657	0.00159909
										60.6068	658.167	0.0927287	0.00158968
										60.8597	660.183	0.0927739	0.00157831
										60.9962	660.866	0.0927894	0.00156576
										72.1661	715.957	0.101533	0.00147819
										72.1598	714.657	0.101509	0.00145682
										71.8957	710.87	0.101438	0.00143665
										71.3917	704.854	0.101326	0.00141908
										70.6821	697.02	0.101179	0.00140528
										69.8154	687.9	0.101009	0.00139621
										68.8507	678.117	0.100825	0.00139247
										67.8535	668.338	0.100642	0.00139433
										66.892	659.228	0.100471	0.00140166
										66.0316	651.408	0.100325	0.00141396
										65.3309	645.412	0.100212	0.00143039
										64.8378	641.648	0.100141	0.00144982
										64.5858	640.373	0.100117	0.00147095
										64.5921	641.673	0.100141	0.00149232
										64.8562	645.46	0.100212	0.00151248
										65.3602	651.475	0.100324	0.00153006
										66.0697	659.31	0.100471	0.00154385
										66.9364	668.429	0.100641	0.00155293
										67.9012	678.212	0.100825	0.00155666
										68.8984	687.992	0.101008	0.0015548
										69.8599	697.102	0.101178	0.00154747
										70.7203	704.922	0.101325	0.00153518
										71.4209	710.918	0.101438	0.00151875
										71.9141	714.682	0.101508	0.00149931
										72.1661	715.957	0.101533	0.00147819
										121.88	1088.09	0.112499	0.000967812
										121.803	1086.27	0.112483	0.000954982
										121.329	1080.97	0.112436	0.000942904
										120.489	1072.55	0.112362	0.0009324
										119.341	1061.59	0.112264	0.000924188
										117.964	1048.82	0.112151	0.000918825
										116.451	1035.13	0.112029	0.000916678
										114.905	1021.44	0.111908	0.000917893
										113.432	1008.69	0.111794	0.000922387
										112.132	997.74	0.111697	0.000929854
										111.093	989.344	0.111622	0.000939785
										110.387	984.072	0.111575	0.000951504
										110.061	982.283	0.111559	0.000964211
										110.138	984.1	0.111575	0.000977041
										110.613	989.398	0.111622	0.000989119
										111.452	997.816	0.111696	0.000999622
										112.6	1008.78	0.111794	0.00100784
										113.977	1021.54	0.111907	0.0010132
										115.49	1035.24	0.112029	0.00101534
										117.036	1048.93	0.112151	0.00101413
										118.509	1061.68	0.112264	0.00100964
										119.81	1072.63	0.112361	0.00100217
										120.848	1081.03	0.112436	0.000992237
										121.554	1086.3	0.112483	0.000980519
										121.88	1088.09	0.112499	0.000967812
										109.29	869.779	0.126489	0.00127401
										109.101	866.947	0.126461	0.00123945
										108.219	858.687	0.12638	0.00120698
										106.705	845.56	0.12625	0.00117882
										104.662	828.462	0.126081	0.00115688
										102.229	808.557	0.125884	0.00114267
										99.572	787.202	0.125673	0.00113715
										96.8716	765.853	0.125461	0.00114069
										94.3121	745.964	0.125264	0.00115306
										92.0679	728.891	0.125095	0.00117341
										90.2921	715.797	0.124965	0.00120036
										89.1055	707.575	0.124884	0.00123207
										88.589	704.784	0.124856	0.00126637
										88.778	707.616	0.124883	0.00130094
										89.6594	715.876	0.124965	0.00133341
										91.1732	729.003	0.125094	0.00136157
										93.2163	746.102	0.125263	0.0013835
										95.6494	766.006	0.12546	0.00139772
										98.3067	787.361	0.125671	0.00140324
										101.007	808.71	0.125883	0.00139969
										103.567	828.599	0.12608	0.00138732
										105.811	845.672	0.126249	0.00136697
										107.587	858.766	0.126379	0.00134002
										108.773	866.989	0.126461	0.00130832
										109.29	869.779	0.126489	0.00127401
										104.726	825.692	0.127832	0.00132439
										104.621	823.383	0.1278	0.00129404
										103.946	816.657	0.127705	0.00126534
										102.746	805.973	0.127553	0.00124024
										101.103	792.06	0.127356	0.00122046
										99.1292	775.866	0.127126	0.00120735
										96.9592	758.494	0.126879	0.00120179
										94.7406	741.128	0.126633	0.00120417
										92.6249	724.952	0.126402	0.00121432
										90.756	711.067	0.126205	0.00123155
										89.2614	700.421	0.126053	0.0012547
										88.2429	693.739	0.125958	0.00128217
										87.77	691.475	0.125925	0.0013121
										87.8749	693.785	0.125957	0.00134245
										88.5503	700.511	0.126052	0.00137115
										89.7504	711.194	0.126204	0.00139625
										91.3932	725.107	0.126401	0.00141603
										93.3669	741.302	0.126631	0.00142914
										95.537	758.674	0.126878	0.0014347
										97.7555	776.04	0.127125	0.00143233
										99.8713	792.216	0.127355	0.00142217
										101.74	806.1	0.127552	0.00140494
										103.235	816.746	0.127704	0.0013818
										104.253	823.429	0.1278	0.00135432
										104.726	825.692	0.127832	0.00132439
										124.295	1007.07	0.124513	0.00112872
										124.043	1003.05	0.124477	0.00109029
										122.826	991.321	0.124371	0.00105413
										120.725	972.681	0.124202	0.00102272
										117.884	948.401	0.123983	0.000998179
										114.496	920.136	0.123727	0.000982196
										110.792	889.812	0.123453	0.000975855
										107.026	859.496	0.123178	0.00097959
										103.452	831.254	0.122922	0.000993144
										100.316	807.01	0.122702	0.00101559
										97.8297	788.417	0.122534	0.00104541
										96.1639	776.741	0.122427	0.00108056
										95.4316	772.779	0.122391	0.00111865
										95.6828	776.8	0.122427	0.00115709
										96.9004	788.531	0.122533	0.00119324
										99.0013	807.172	0.122701	0.00122466
										101.842	831.452	0.122921	0.0012492
										105.23	859.717	0.123177	0.00126518
										108.934	890.041	0.123451	0.00127152
										112.7	920.357	0.123726	0.00126779
										116.274	948.599	0.123982	0.00125423
										119.41	972.843	0.124201	0.00123178
										121.896	991.436	0.12437	0.00120197
										123.562	1003.11	0.124476	0.00116681
										124.295	1007.07	0.124513	0.00112872
										66.2919	593.417	0.112755	0.00190216
										66.1828	591.21	0.112721	0.00184238
										65.5931	584.772	0.112622	0.00178584
										64.5632	574.541	0.112464	0.00173639
										63.163	561.213	0.112258	0.00169742
										61.4881	545.698	0.112017	0.00167156
										59.6526	529.052	0.111759	0.00166059
										57.7815	512.411	0.1115	0.00166525
										56.0025	496.907	0.111259	0.00168522
										54.4366	483.598	0.111052	0.00171915
										53.1908	473.39	0.110893	0.00176472
										52.3497	466.98	0.110792	0.00181882
										51.9708	464.804	0.110758	0.00187777
										52.0799	467.01	0.110791	0.00193755
										52.6695	473.448	0.11089	0.00199409
										53.6995	483.68	0.111048	0.00204354
										55.0997	497.007	0.111254	0.00208251
										56.7746	512.523	0.111495	0.00210837
										58.6101	529.168	0.111753	0.00211934
										60.4812	545.81	0.112012	0.00211468
										62.2602	561.314	0.112253	0.00209471
										63.826	574.623	0.11246	0.00206078
										65.0719	584.83	0.11262	0.00201521
										65.913	591.24	0.11272	0.00196111
										66.2919	593.417	0.112755	0.00190216
										55.7444	580.497	0.0969012	0.00189276
										55.6969	578.807	0.0968735	0.0018473
										55.3316	573.874	0.0967911	0.00180423
										54.6736	566.035	0.0966596	0.00176649
										53.7676	555.824	0.096488	0.00173666
										52.6754	543.936	0.096288	0.00171676
										51.4714	531.181	0.0960733	0.00170815
										50.2377	518.43	0.0958583	0.00171142
										49.0584	506.55	0.0956579	0.00172634
										48.0137	496.352	0.0954857	0.0017519
										47.175	488.53	0.0953533	0.00178636
										46.5993	483.617	0.0952698	0.00182737
										46.3259	481.949	0.095241	0.00187213
										46.3735	483.639	0.0952687	0.0019176
										46.7387	488.571	0.0953511	0.00196067
										47.3967	496.411	0.0954826	0.00199841
										48.3027	506.622	0.0956542	0.00202824
										49.3949	518.51	0.0958542	0.00204814
										50.5989	531.265	0.0960689	0.00205675
										51.8326	544.016	0.0962838	0.00205348
										53.012	555.896	0.0964843	0.00203856
										54.0566	566.094	0.0966565	0.00201299
										54.8954	573.916	0.0967889	0.00197853
										55.471	578.829	0.0968723	0.00193752
										55.7444	580.497	0.0969012	0.00189276
										40.7154	466.534	0.0880163	0.00227272
										40.7215	465.675	0.0879926	0.00223932
										40.5796	463.171	0.0879225	0.00220766
										40.2995	459.192	0.0878107	0.0021799
										39.9002	454.01	0.0876649	0.00215792
										39.4089	447.977	0.0874949	0.00214323
										38.8591	441.504	0.0873124	0.00213683
										38.2882	435.034	0.0871298	0.00213916
										37.7353	429.006	0.0869596	0.00215005
										37.2379	423.832	0.0868133	0.00216876
										36.8299	419.864	0.0867009	0.00219402
										36.5393	417.373	0.0866301	0.00222411
										36.3856	416.528	0.0866057	0.00225697
										36.3795	417.387	0.0866294	0.00229037
										36.5214	419.891	0.0866995	0.00232203
										36.8015	423.87	0.0868113	0.00234979
										37.2009	429.053	0.0869571	0.00237177
										37.6922	435.086	0.0871271	0.00238646
										38.242	441.558	0.0873096	0.00239286
										38.8128	448.028	0.0874921	0.00239053
										39.3658	454.056	0.0876624	0.00237965
										39.8631	459.23	0.0878087	0.00236093
										40.2711	463.198	0.0879211	0.00233567
										40.5618	465.689	0.0879919	0.00230559
										40.7154	466.534	0.0880163	0.00227272
										37.687	481.217	0.0790675	0.00219518
										37.7066	480.385	0.0790435	0.00216497
										37.5968	477.959	0.0789726	0.00213635
										37.3651	474.104	0.0788596	0.00211126
										37.0272	469.083	0.0787122	0.00209142
										36.6061	463.238	0.0785404	0.00207818
										36.1307	456.967	0.078356	0.00207243
										35.6332	450.698	0.0781715	0.00207458
										35.1477	444.858	0.0779996	0.00208447
										34.7071	439.845	0.0778518	0.00210143
										34.3414	436	0.0777383	0.0021243
										34.0757	433.586	0.0776669	0.00215154
										33.9281	432.767	0.0776423	0.00218127
										33.9085	433.599	0.0776663	0.00221147
										34.0183	436.025	0.0777372	0.00224009
										34.2501	439.88	0.0778502	0.00226518
										34.588	444.901	0.0779976	0.00228502
										35.009	450.746	0.0781694	0.00229827
										35.4844	457.017	0.0783538	0.00230401
										35.9819	463.286	0.0785382	0.00230187
										36.4674	469.126	0.0787102	0.00229198
										36.9081	474.14	0.078858	0.00227502
										37.2737	477.984	0.0789714	0.00225214
										37.5394	480.398	0.0790429	0.00222491
										37.687	481.217	0.0790675	0.00219518
										33.1318	455.049	0.0734994	0.00230445
										33.1561	454.365	0.0734774	0.00227709
										33.0811	452.373	0.0734124	0.00225116
										32.9119	449.208	0.0733088	0.00222842
										32.6601	445.085	0.0731736	0.00221043
										32.3429	440.285	0.0730161	0.00219841
										31.9817	435.135	0.072847	0.00219317
										31.6014	429.988	0.0726778	0.00219508
										31.2277	425.192	0.0725201	0.00220401
										30.8861	421.075	0.0723846	0.00221934
										30.6	417.918	0.0722805	0.00224004
										30.3888	415.936	0.072215	0.00226469
										30.2669	415.263	0.0721924	0.00229161
										30.2426	415.946	0.0722144	0.00231897
										30.3176	417.938	0.0722795	0.0023449
										30.4867	421.104	0.0723831	0.00236763
										30.7385	425.227	0.0725183	0.00238563
										31.0558	430.027	0.0726758	0.00239765
										31.4169	435.176	0.0728449	0.00240288
										31.7973	440.324	0.0730141	0.00240097
										32.171	445.12	0.0731718	0.00239204
										32.5125	449.236	0.0733073	0.00237671
										32.7987	452.394	0.0734114	0.00235601
										33.0099	454.376	0.0734769	0.00233137
										33.1318	455.049	0.0734994	0.00230445
										31.6482	434.918	0.0734243	0.00240277
										31.6717	434.306	0.0734032	0.00237614
										31.606	432.523	0.0733408	0.00235096
										31.4559	429.689	0.0732415	0.00232894
										31.2313	425.999	0.073112	0.0023116
										30.9478	421.703	0.0729611	0.0023001
										30.6245	417.094	0.0727991	0.00229524
										30.2835	412.486	0.072637	0.00229734
										29.9481	408.194	0.0724859	0.00230626
										29.6411	404.509	0.0723561	0.00232139
										29.3835	401.683	0.0722564	0.00234171
										29.1927	399.909	0.0721937	0.00236583
										29.0818	399.307	0.0721721	0.0023921
										29.0584	399.919	0.0721932	0.00241873
										29.124	401.702	0.0722556	0.00244391
										29.2742	404.535	0.0723549	0.00246593
										29.4987	408.226	0.0724844	0.00248327
										29.7823	412.522	0.0726353	0.00249477
										30.1056	417.131	0.0727973	0.00249963
										30.4465	421.739	0.0729594	0.00249753
										30.7819	426.031	0.0731105	0.00248861
										31.0889	429.716	0.0732403	0.00247348
										31.3466	432.542	0.07334	0.00245316
										31.5374	434.316	0.0734027	0.00242904
										31.6482	434.918	0.0734243	0.00240277
										28.9094	425.859	0.0686491	0.00242122
										28.9546	425.482	0.0686271	0.00240465
										28.9492	424.386	0.068562	0.00238846
										28.8936	422.645	0.0684582	0.00237374
										28.7917	420.377	0.0683228	0.0023615
										28.6503	417.739	0.0681651	0.00235256
										28.479	414.908	0.0679958	0.00234755
										28.2897	412.079	0.0678264	0.0023468
										28.095	409.444	0.0676685	0.00235035
										27.9084	407.182	0.0675328	0.00235798
										27.7426	405.448	0.0674285	0.00236916
										27.6088	404.36	0.0673629	0.00238313
										27.5161	403.992	0.0673403	0.00239893
										27.4709	404.368	0.0673624	0.00241549
										27.4763	405.465	0.0674275	0.00243168
										27.5318	407.206	0.0675313	0.0024464
										27.6338	409.473	0.0676666	0.00245865
										27.7752	412.112	0.0678243	0.00246758
										27.9464	414.942	0.0679937	0.0024726
										28.1358	417.772	0.0681631	0.00247335
										28.3304	420.407	0.068321	0.00246979
										28.517	422.669	0.0684567	0.00246216
										28.6829	424.403	0.0685609	0.00245099
										28.8167	425.491	0.0686265	0.00243702
										28.9094	425.859	0.0686491	0.00242122
										28.4903	420.141	0.068042	0.00242013
										28.4987	419.911	0.0680345	0.00240995
										28.4758	419.241	0.0680122	0.00240036
										28.4231	418.175	0.0679768	0.00239203
										28.3443	416.787	0.0679307	0.00238551
										28.2447	415.171	0.0678769	0.00238126
										28.1311	413.438	0.0678191	0.00237956
										28.0112	411.705	0.0677614	0.00238052
										27.8933	410.09	0.0677076	0.00238409
										27.7853	408.704	0.0676613	0.00239002
										27.6946	407.642	0.0676258	0.0023979
										27.6274	406.974	0.0676034	0.0024072
										27.5883	406.747	0.0675958	0.00241728
										27.5799	406.977	0.0676033	0.00242746
										27.6029	407.648	0.0676255	0.00243705
										27.6555	408.713	0.0676609	0.00244538
										27.7343	410.101	0.0677071	0.0024519
										27.834	411.717	0.0677609	0.00245615
										27.9476	413.45	0.0678186	0.00245786
										28.0674	415.183	0.0678764	0.00245689
										28.1853	416.798	0.0679302	0.00245332
										28.2933	418.184	0.0679765	0.0024474
										28.384	419.247	0.068012	0.00243951
										28.4512	419.914	0.0680343	0.00243021
										28.4903	420.141	0.068042	0.00242013
										26.5336	418.115	0.0636916	0.00243744
										26.5411	417.854	0.063684	0.0024257
										26.5152	417.092	0.0636616	0.00241467
										26.4579	415.881	0.0636258	0.00240509
										26.373	414.302	0.0635792	0.00239763
										26.2662	412.465	0.0635249	0.00239278
										26.145	410.493	0.0634666	0.00239088
										26.0174	408.522	0.0634083	0.00239206
										25.8923	406.686	0.0633539	0.00239624
										25.7781	405.11	0.0633072	0.00240314
										25.6826	403.9	0.0632714	0.00241227
										25.6124	403.141	0.0632488	0.00242303
										25.5721	402.883	0.063241	0.00243468
										25.5647	403.144	0.0632486	0.00244641
										25.5905	403.906	0.0632711	0.00245745
										25.6478	405.118	0.0633068	0.00246703
										25.7328	406.696	0.0633534	0.00247449
										25.8395	408.534	0.0634077	0.00247934
										25.9608	410.505	0.063466	0.00248123
										26.0884	412.476	0.0635244	0.00248005
										26.2135	414.312	0.0635787	0.00247587
										26.3277	415.889	0.0636254	0.00246898
										26.4232	417.098	0.0636613	0.00245984
										26.4934	417.857	0.0636839	0.00244909
										26.5336	418.115	0.0636916	0.00243744
