# Supplementary material for: Exploring a link between the Middle Eocene Climatic Optimum and Neotethys continental arc flare-up
Source: Copernicus journal article supplement (doi:10.5194/cp-17-229-2021), 2021-01-18
Supplement: Supplementary file 16 [file S25_VU107-A1_2.xls]

## Sheet: Summary Table
	Relative Abundances			36Ar [fA]	%1s	37Ar [fA]	%1s	38Ar [fA]	%1s	39Ar [fA]	%1s	40Ar [fA]	%1s	40(r)/39(k)	± 2s	Age	± 2s	40Ar(r)	39Ar(k)	K/Ca	± 2s		Procedure Blanks		36Ar [fA]	1s	37Ar [fA]	1s	38Ar [fA]	1s	39Ar [fA]	1s	40Ar [fA]	1s		Sample Parameters		Sample	Material	Location	Analyst	Standard	%1s	J	%1s	MDF	%1s	Volume Ratio	Sensitivity
																(Ma)		(%)	(%)																							(in Ma)							(mol/volt)
	011_VU107-A1_2	11		0.210101	0.495151	2.08473	2.11884	0.0721389	0.531302	2.42291	1.90397	76.5074	0.0562817	5.75763	0.34365	49.6761	2.92509	18.2233	1.45617	0.499464	0.028463		011_VU107-A1_2	11	0.0099628	0.0001747	0.0110658	0.0001255	0.0055507	9.3e-05	0.138865	0.0298022	2.82615	0.0043164		011_VU107-A1_2	11	011_VU107-A1_2	IR22	groundmass	Klaudia Kuiper	28.201	0.08	0.0047753	0.1	0.985339	0.1	1	1e-13
	012_VU107-A1_2	13		0.373427	0.488729	5.24768	1.50972	0.142633	0.380637	5.4862	0.888941	127.97	0.101288	3.08047	0.215706	26.7454	1.8592	13.1978	3.297	0.449256	0.0157444		012_VU107-A1_2	13	0.0099628	0.0001747	0.0110658	0.0001255	0.0055507	9.3e-05	0.138865	0.0298022	2.82615	0.0043164		012_VU107-A1_2	13	012_VU107-A1_2	IR22	groundmass	Klaudia Kuiper	28.201	0.08	0.0047753	0.1	0.985339	0.1	1	1e-13
	013_VU107-A1_2	14		0.310709	0.470886	7.03993	1.17672	0.16676	0.48989	7.8276	0.574366	137.874	0.186063	5.8365	0.147914	50.3473	1.25856	33.116	4.70427	0.477822	0.0125148		013_VU107-A1_2	14	0.0099628	0.0001747	0.0110658	0.0001255	0.0055507	9.3e-05	0.138865	0.0298022	2.82615	0.0043164		013_VU107-A1_2	14	013_VU107-A1_2	IR22	groundmass	Klaudia Kuiper	28.201	0.08	0.0047753	0.1	0.985339	0.1	1	1e-13
	015_VU107-A1_2	15	4	0.339601	0.763617	9.24901	1.1773	0.202025	0.715874	9.76026	0.612371	160.319	0.643393	6.1155	0.27571	52.7196	2.3429	37.2076	5.86558	0.453479	0.0120373		015_VU107-A1_2	15	0.0192289	0.0009825	0.0119589	0.0001729	0.0138467	0.0006652	0.390916	0.0082095	5.78188	0.11574		015_VU107-A1_2	15	015_VU107-A1_2	IR22	groundmass	Klaudia Kuiper	28.201	0.08	0.0047753	0.1	0.985339	0.1	1	1e-13
	017_VU107-A1_2	16	4	0.292239	0.627712	9.59325	1.08833	0.182531	0.562947	9.35918	0.248274	143.343	0.237604	6.07764	0.142504	52.3979	1.21116	39.6548	5.62425	0.419219	0.00935972		017_VU107-A1_2	16	0.0192289	0.0009825	0.0119589	0.0001729	0.0138467	0.0006652	0.390916	0.0082095	5.78188	0.11574		017_VU107-A1_2	16	017_VU107-A1_2	IR22	groundmass	Klaudia Kuiper	28.201	0.08	0.0047753	0.1	0.985339	0.1	1	1e-13
	018_VU107-A1_2	17	4	0.322824	0.896823	12.5213	1.45017	0.222086	0.811544	11.7661	0.766845	165.686	0.876478	5.97766	0.302237	51.548	2.56997	42.4195	7.07047	0.403775	0.0132494		018_VU107-A1_2	17	0.0192289	0.0009825	0.0119589	0.0001729	0.0138467	0.0006652	0.390916	0.0082095	5.78188	0.11574		018_VU107-A1_2	17	018_VU107-A1_2	IR22	groundmass	Klaudia Kuiper	28.201	0.08	0.0047753	0.1	0.985339	0.1	1	1e-13
	020_VU107-A1_2	18	4	0.28133	0.819477	12.4666	1.07427	0.199847	0.937133	11.5346	0.889287	150.684	0.899242	5.87043	0.284062	50.636	2.41662	44.9045	6.9313	0.397564	0.0110921		020_VU107-A1_2	18	0.0195467	0.0004607	0.0124799	0.0002109	0.0186852	0.0010829	0.498802	0.061094	7.75901	0.218922		020_VU107-A1_2	18	020_VU107-A1_2	IR22	groundmass	Klaudia Kuiper	28.201	0.08	0.0047753	0.1	0.985339	0.1	1	1e-13
	021_VU107-A1_2	20	4	0.296209	0.996219	16.3091	1.15696	0.225548	1.07864	13.1721	0.846154	161.808	0.848391	5.67181	0.266209	48.9454	2.26683	46.1332	7.91441	0.347	0.00995046		021_VU107-A1_2	20	0.0195467	0.0004607	0.0124799	0.0002109	0.0186852	0.0010829	0.498802	0.061094	7.75901	0.218922		021_VU107-A1_2	20	021_VU107-A1_2	IR22	groundmass	Klaudia Kuiper	28.201	0.08	0.0047753	0.1	0.985339	0.1	1	1e-13
	022_VU107-A1_2	24		0.408605	0.828863	30.4461	1.12952	0.315473	0.823829	17.3551	0.875393	213.804	0.553113	5.43418	0.203761	46.9209	1.737	44.0588	10.4242	0.244822	0.0070003		022_VU107-A1_2	24	0.0195467	0.0004607	0.0124799	0.0002109	0.0186852	0.0010829	0.498802	0.061094	7.75901	0.218922		022_VU107-A1_2	24	022_VU107-A1_2	IR22	groundmass	Klaudia Kuiper	28.201	0.08	0.0047753	0.1	0.985339	0.1	1	1e-13
	024_VU107-A1_2	33		0.474868	0.700447	102.862	0.805289	0.376954	0.806117	21.1457	0.717981	238.001	0.662213	4.9495	0.19123	42.7844	1.63386	43.831	12.6743	0.088107	0.00190392		024_VU107-A1_2	33	0.0247453	0.0005914	0.0139275	0.0002109	0.0261516	0.0015696	0.65906	0.0235287	10.1867	0.264878		024_VU107-A1_2	33	024_VU107-A1_2	IR22	groundmass	Klaudia Kuiper	28.201	0.08	0.0047753	0.1	0.985339	0.1	1	1e-13
	025_VU107-A1_2	50		0.422837	0.499507	95.0641	0.78252	0.291658	0.701897	14.8265	0.282387	176.428	0.171562	3.90657	0.0992794	33.8519	0.852387	32.688	8.87745	0.0667749	0.00111159		025_VU107-A1_2	50	0.0247453	0.0005914	0.0139275	0.0002109	0.0261516	0.0015696	0.65906	0.0235287	10.1867	0.264878		025_VU107-A1_2	50	025_VU107-A1_2	IR22	groundmass	Klaudia Kuiper	28.201	0.08	0.0047753	0.1	0.985339	0.1	1	1e-13
	027_VU107-A1_2	80		0.441613	0.513749	72.435	0.801786	0.439887	0.390125	26.946	0.321195	243.586	0.0710396	4.3658	0.0600495	37.7905	0.514462	48.2081	16.1747	0.159672	0.00275896		027_VU107-A1_2	80	0.0199196	0.0004953	0.0149896	0.0001683	0.0184883	0.0008524	0.421196	0.0466269	7.3914	0.10488		027_VU107-A1_2	80	027_VU107-A1_2	IR22	groundmass	Klaudia Kuiper	28.201	0.08	0.0047753	0.1	0.985339	0.1	1	1e-13
	028_VU107-A1_2	16		0.585282	0.485696	75.4436	0.813178	0.343698	0.414073	14.9937	0.547932	231.083	0.0787734	4.16795	0.127348	36.0947	1.09204	26.9521	8.98594	0.0851692	0.00167205		028_VU107-A1_2	16	0.0199196	0.0004953	0.0149896	0.0001683	0.0184883	0.0008524	0.421196	0.0466269	7.3914	0.10488		028_VU107-A1_2	16	028_VU107-A1_2	IR22	groundmass	Klaudia Kuiper	28.201	0.08	0.0047753	0.1	0.985339	0.1	1	1e-13
			S	4.75965	0.187061	450.763	0.328738	3.18124	0.203913	166.596	0.193437	2227.09	0.149806
	Information on Analysis and Constants Used in Calculations									Results		40(a)/36(a)	± 2s	40(r)/39(k)	± 2s	Age	± 2s	MSWD	39Ar(k)	K/Ca	± 2s
																(Ma)			(%,n)
	Sample = 011_VU107-A1_2				Age Equations = Min et al. (2000)					Age Plateau				5.98859	0.148189	51.6409	1.26411	2.19268	33.406	0.401299	0.0352153
	Material = IR22				Negative Intensities = Allowed										0.0247451		0.0244789	0.0670925	5
	Location = groundmass				Decay Constant 40K = 5.460 ± 0.053 E-10 1/a					Full External Error							1.65606	2.41421	2σ Confidence Limit
	Analyst = Klaudia Kuiper				Decay Constant 39Ar = 2.940 ± 0.016 E-07 1/h					Analytical Error							1.26	1.48077	Error Magnification
	Project = VU107				Decay Constant 37Ar = 8.230 ± 0.012 E-04 1/h
	Mass Discrimination Law = LIN				Decay Constant 36Cl = 2.257 ± 0.015 E-06 1/a					Total Fusion Age				5.06021	0.055177	43.7301	0.479046		13	0.158633	0.00121071
	Irradiation = VU107				Decay Activity 40K(EC,β⁺) = 3.310 ± 0.030 1/gs										0.0109041		0.0109546
	J = 0.00477530 ± 0.00000478				Decay Activity 40K(β⁻) = 27.890 ± 0.150 1/gs					Full External Error							1.02614
	FCs = 28.201 ± 0.023 Ma				Atmospheric Ratio 40/36(a) = 298.56 ± 0.31					Analytical Error							0.471186
	IGSN = Undefined				Atmospheric Ratio 38/36(a) = 0.1885 ± 0.0003
	Preferred Age = Undefined				Production Ratio 39/37(ca) = 0.000673 ± 0.000004					Normal Isochron Overestimated Error		333.746	25.6122	4.96975	0.745021	42.9574	6.36538	0.296894	33.406
	Classification = Undefined				Production Ratio 36/37(ca) = 0.000264 ± 0.000002								0.0767417		0.149911		0.148179	0.827676	5
	Experiment Type = Undefined				Production Ratio 40/39(k) = 0.000860 ± 0.000070					Full External Error							6.42752	2.63299	2σ Confidence Limit
	Extraction Method = Undefined				Production Ratio 38/39(k) = 0.012110 ± 0.000030					Analytical Error							6.36481	1	Error Magnification
	Heating = 720 sec				Production Ratio 36/38(cl) = 262.80 ± 1.71												6		Number of Iterations
	Isolation = 18.00 min				Scaling Ratio K/Ca = 0.430												1.55748e-05		Convergence
	Instrument = HELIX				Abundance Ratio 40K/K = 1.1700 ± 0.0100 E-04
	Lithology = Undefined				Atomic Weight K = 39.0983 ± 0.0001 g					Inverse Isochron Overestimated Error		333.666	25.6792	4.97261	0.745196	42.9819	6.36679	0.295206	33.406
	Lat-Lon = Undefined - Undefined												0.0769605		0.14986		0.148127	0.828897	5
	Feature = Undefined									Full External Error							6.42899	2.63299	2σ Confidence Limit
										Analytical Error							6.36623	1	Error Magnification
																	5		Number of Iterations
																	0.000256082		Convergence
																	0.101932		Spreading Factor
[truncated: 39 more columns]

## Sheet: Hidden Data
Double Line Plot Age Plateau			Double Line Plot K/Ca Plateau			X-Y Plot Normal Isochron		X-Y Plot Inverse Isochron		Error Ellipses Normal Isochron		Error Ellipses Inverse Isochron
Ar39k%	Line 1	Line 2	Ar39k%	Line 1	Line 2	X-axis	Y-axis	X-axis	Y-axis	X-axis	Y-axis	X-axis	Y-axis
0	46.751	52.6012	0	0.471001	0.527927	11.5558	365.094	0.0316515	0.00273902			0.032858	0.00273911
1.45617	46.751	52.6012	1.45617	0.471001	0.527927	14.7368	343.956	0.042845	0.00290735			0.0328169	0.00273203
1.45617	28.6046	24.8862	1.45617	0.465	0.433511	25.3294	446.395	0.0567422	0.00224017			0.0326964	0.00272541
4.75317	28.6046	24.8862	4.75317	0.465	0.433511	28.9308	475.486	0.0608446	0.00210311			0.0325046	0.00271973
4.75317	49.0887	51.6058	4.75317	0.465307	0.490337	32.2842	494.771	0.0652507	0.00202114			0.0322548	0.00271536
9.45745	49.0887	51.6058	9.45745	0.465307	0.490337	36.7991	518.532	0.0709678	0.00192852			0.0319638	0.00271261
9.45745	55.0625	50.3767	9.45745	0.465517	0.441442	41.456	541.925	0.0764977	0.00184527			0.0316515	0.00271165
15.323	55.0625	50.3767	15.323	0.465517	0.441442	45.0878	554.289	0.0813434	0.00180411			0.0313392	0.00271256
15.323	51.1867	53.609	15.323	0.409859	0.428579	43.2764	533.732	0.0810827	0.0018736			0.0310483	0.00271527
20.9473	51.1867	53.609	20.9473	0.409859	0.428579	47.0776	531.57	0.0885632	0.00188122			0.0307984	0.0027196
20.9473	54.1179	48.978	20.9473	0.417024	0.390526	37.1175	443.562	0.0836805	0.00225448			0.0306067	0.00272526
28.0177	54.1179	48.978	28.0177	0.417024	0.390526	63.6658	576.512	0.110433	0.00173457			0.0304861	0.00273185
28.0177	48.2193	53.0526	28.0177	0.386472	0.408656	26.4318	408.726	0.0646686	0.00244662			0.030445	0.00273893
34.949	48.2193	53.0526	34.949	0.386472	0.408656							0.0304861	0.00274602
34.949	51.2123	46.6786	34.949	0.35695	0.337049							0.0306067	0.00275263
42.8635	51.2123	46.6786	42.8635	0.35695	0.337049							0.0307984	0.00275831
42.8635	45.1839	48.6579	42.8635	0.237822	0.251823							0.0310483	0.00276268
53.2876	45.1839	48.6579	53.2876	0.237822	0.251823							0.0313392	0.00276544
53.2876	44.4183	41.1506	53.2876	0.0900109	0.0862031							0.0316515	0.00276639
65.9619	44.4183	41.1506	65.9619	0.0900109	0.0862031							0.0319638	0.00276548
65.9619	32.9995	34.7043	65.9619	0.0656633	0.0678865							0.0322548	0.00276277
74.8394	32.9995	34.7043	74.8394	0.0656633	0.0678865							0.0325046	0.00275844
74.8394	38.305	37.276	74.8394	0.162431	0.156913							0.0326964	0.00275279
91.0141	38.305	37.276	91.0141	0.162431	0.156913							0.0328169	0.00274619
91.0141	35.0027	37.1868	91.0141	0.0834972	0.0868413							0.032858	0.00273911
100	35.0027	37.1868	100	0.0834972	0.0868413
												0.0436122	0.00290801
												0.043586	0.00290045
												0.0435094	0.00289336
												0.0433875	0.00288723
												0.0432286	0.00288246
												0.0430436	0.00287939
												0.042845	0.00287823
												0.0426465	0.00287905
												0.0424615	0.00288179
												0.0423026	0.00288628
												0.0421807	0.00289221
												0.042104	0.00289917
												0.0420779	0.00290668
												0.042104	0.00291424
												0.0421806	0.00292133
												0.0423025	0.00292747
												0.0424614	0.00293223
												0.0426464	0.0029353
												0.042845	0.00293647
												0.0430435	0.00293565
												0.0432286	0.0029329
												0.0433875	0.00292841
												0.0435094	0.00292248
												0.043586	0.00291553
												0.0436122	0.00290801
												0.0574277	0.00224274
												0.0574044	0.00223678
												0.0573359	0.00223106
												0.057227	0.00222596
												0.057085	0.00222183
												0.0569197	0.00221894
												0.0567423	0.00221751
												0.0565648	0.00221761
												0.0563995	0.00221926
												0.0562575	0.00222233
												0.0561485	0.00222661
												0.05608	0.00223182
												0.0560566	0.0022376
												0.05608	0.00224355
												0.0561484	0.00224927
												0.0562574	0.00225437
												0.0563993	0.00225851
												0.0565647	0.00226139
												0.0567421	0.00226283
												0.0569195	0.00226272
												0.0570849	0.00226108
												0.0572269	0.00225801
												0.0573358	0.00225372
												0.0574043	0.00224851
												0.0574277	0.00224274
												0.0619259	0.00212273
												0.0618892	0.0021124
												0.0617814	0.00210143
												0.0616097	0.00209058
												0.0613858	0.00208058
												0.0611251	0.00207212
												0.0608453	0.00206577
												0.0605655	0.00206196
												0.0603046	0.00206096
												0.0600806	0.00206283
												0.0599086	0.00206745
												0.0598004	0.00207449
												0.0597634	0.00208349
												0.0598001	0.00209382
												0.0599079	0.00210479
												0.0600796	0.00211564
												0.0603034	0.00212564
												0.0605641	0.0021341
												0.060844	0.00214045
												0.0611238	0.00214426
												0.0613847	0.00214526
												0.0616087	0.00214339
												0.0617807	0.00213877
												0.0618889	0.00213173
												0.0619259	0.00212273
												0.0656993	0.0020278
												0.0656841	0.00202071
												0.0656394	0.00201365
												0.0655682	0.00200709
												0.0654753	0.0020015
												0.0653672	0.00199724
												0.0652511	0.00199462
												0.0651349	0.0019938
												0.0650267	0.00199484
												0.0649337	0.00199767
												0.0648623	0.00200211
												0.0648174	0.00200784
												0.064802	0.00201447
												0.0648172	0.00202156
												0.0648619	0.00202863
												0.0649331	0.00203518
												0.065026	0.00204077
												0.0651342	0.00204503
												0.0652503	0.00204765
												0.0653664	0.00204847
												0.0654746	0.00204743
												0.0655676	0.0020446
												0.065639	0.00204016
												0.0656839	0.00203443
												0.0656993	0.0020278
												0.0726213	0.00195397
												0.0725651	0.00194238
												0.0724001	0.00192984
												0.0721374	0.00191722
												0.0717951	0.00190536
												0.0713963	0.00189508
												0.0709684	0.00188708
												0.0705404	0.00188191
												0.0701415	0.00187991
												0.069799	0.00188122
												0.0695361	0.00188576
												0.0693707	0.00189321
												0.0693142	0.00190307
												0.0693704	0.00191466
												0.0695354	0.0019272
												0.0697981	0.00193982
												0.0701404	0.00195168
												0.0705392	0.00196196
												0.0709671	0.00196996
												0.0713951	0.00197513
												0.071794	0.00197713
												0.0721365	0.00197582
												0.0723994	0.00197128
												0.0725648	0.00196383
												0.0726213	0.00195397
												0.0784334	0.00186887
												0.0783676	0.00185811
												0.0781743	0.00184647
												0.0778668	0.00183475
												0.077466	0.00182374
												0.0769992	0.00181421
												0.0764982	0.00180679
												0.0759972	0.00180199
												0.0755303	0.00180014
												0.0751293	0.00180137
												0.0748216	0.00180559
												0.0746281	0.00181252
												0.074562	0.00182167
												0.0746279	0.00183244
												0.0748211	0.00184408
												0.0751287	0.0018558
												0.0755295	0.00186681
												0.0759963	0.00187634
												0.0764973	0.00188376
												0.0769983	0.00188856
												0.0774652	0.00189041
												0.0778662	0.00188918
												0.0781739	0.00188496
												0.0783674	0.00187803
												0.0784334	0.00186887
												0.0832936	0.00182579
												0.0832273	0.00181408
												0.0830326	0.00180168
												0.0827228	0.00178945
												0.0823189	0.00177823
												0.0818486	0.00176876
												0.0813439	0.00176171
												0.0808391	0.00175754
												0.0803687	0.00175655
												0.0799647	0.0017588
												0.0796547	0.00176414
												0.0794597	0.0017722
												0.0793932	0.00178243
												0.0794595	0.00179415
												0.0796542	0.00180654
												0.079964	0.00181877
												0.0803679	0.00183
												0.0808382	0.00183946
												0.0813429	0.00184652
												0.0818477	0.00185068
												0.0823181	0.00185168
												0.0827221	0.00184943
												0.0830321	0.00184409
												0.0832271	0.00183603
												0.0832936	0.00182579
												0.0827634	0.00188467
												0.0827062	0.00187492
												0.0825383	0.00186507
												0.0822713	0.00185581
												0.0819232	0.00184777
												0.0815179	0.00184148
												0.0810829	0.00183738
												0.0806479	0.00183575
												0.0802426	0.0018367
												0.0798945	0.00184016
												0.0796273	0.0018459
												0.0794594	0.00185353
												0.079402	0.00186253
												0.0794592	0.00187228
												0.0796271	0.00188212
												0.0798941	0.00189138
												0.0802422	0.00189943
												0.0806475	0.00190572
												0.0810825	0.00190982
												0.0815175	0.00191145
												0.0819228	0.0019105
												0.0822709	0.00190704
												0.0825381	0.00190129
												0.082706	0.00189366
												0.0827634	0.00188467
												0.0902964	0.00189809
												0.0902374	0.00188884
												0.0900644	0.00187907
												0.089789	0.00186945
												0.0894301	0.00186063
												0.0890121	0.00185321
												0.0885635	0.0018477
												0.0881149	0.00184448
												0.0876969	0.00184376
												0.0873379	0.00184559
												0.0870624	0.00184985
												0.0868891	0.00185625
												0.08683	0.00186435
												0.086889	0.0018736
												0.087062	0.00188336
												0.0873374	0.00189299
												0.0876963	0.00190181
												0.0881143	0.00190922
												0.0885629	0.00191473
												0.0890115	0.00191796
												0.0894295	0.00191868
												0.0897885	0.00191685
												0.090064	0.00191259
												0.0902373	0.00190619
												0.0902964	0.00189809
												0.0842353	0.00225849
												0.0842164	0.00225188
												0.0841611	0.00224545
												0.0840729	0.00223963
												0.0839581	0.00223483
												0.0838243	0.00223136
												0.0836807	0.00222947
												0.0835371	0.00222928
												0.0834033	0.00223081
												0.0832883	0.00223396
												0.0832001	0.0022385
												0.0831447	0.00224413
												0.0831257	0.00225046
												0.0831446	0.00225707
												0.0831999	0.00226351
												0.0832881	0.00226932
												0.0834029	0.00227413
												0.0835367	0.00227759
												0.0836803	0.00227948
												0.0838239	0.00227967
												0.0839577	0.00227814
												0.0840727	0.002275
												0.0841609	0.00227045
												0.0842164	0.00226482
												0.0842353	0.00225849
												0.111161	0.0017351
												0.111136	0.0017302
												0.111063	0.0017256
												0.110947	0.00172161
												0.110797	0.00171851
												0.110621	0.0017165
												0.110433	0.00171572
												0.110244	0.00171622
												0.110069	0.00171798
												0.109918	0.00172086
												0.109802	0.00172468
												0.10973	0.00172918
												0.109705	0.00173404
												0.10973	0.00173894
												0.109802	0.00174354
												0.109918	0.00174752
												0.110069	0.00175063
												0.110244	0.00175264
												0.110433	0.00175342
												0.110621	0.00175292
												0.110797	0.00175116
												0.110947	0.00174828
												0.111063	0.00174446
												0.111136	0.00173996
												0.111161	0.0017351
												0.065387	0.00244717
												0.0653625	0.00244069
												0.0652907	0.00243462
												0.0651766	0.00242936
												0.0650278	0.00242528
												0.0648545	0.00242265
												0.0646686	0.00242166
												0.0644827	0.00242237
												0.0643094	0.00242473
												0.0641606	0.00242859
												0.0640465	0.00243367
												0.0639747	0.00243964
												0.0639502	0.00244608
												0.0639747	0.00245256
												0.0640465	0.00245863
												0.0641606	0.00246389
												0.0643094	0.00246797
												0.0644826	0.0024706
												0.0646686	0.00247159
												0.0648545	0.00247088
												0.0650278	0.00246852
												0.0651765	0.00246466
												0.0652907	0.00245958
												0.0653625	0.00245361
												0.065387	0.00244717
