# Supplementary material for: Exploring a link between the Middle Eocene Climatic Optimum and Neotethys continental arc flare-up
Source: Copernicus journal article supplement (doi:10.5194/cp-17-229-2021), 2021-01-18
Supplement: Supplementary file 17 [file S26_VU107-A2_1.xls]

## Sheet: Summary Table
	Relative Abundances			36Ar [fA]	%1s	37Ar [fA]	%1s	38Ar [fA]	%1s	39Ar [fA]	%1s	40Ar [fA]	%1s	40(r)/39(k)	± 2s	Age	± 2s	40Ar(r)	39Ar(k)	K/Ca	± 2s		Procedure Blanks		36Ar [fA]	1s	37Ar [fA]	1s	38Ar [fA]	1s	39Ar [fA]	1s	40Ar [fA]	1s		Sample Parameters		Sample	Material	Location	Analyst	Standard	%1s	J	%1s	MDF	%1s	Volume Ratio	Sensitivity
																(Ma)		(%)	(%)																							(in Ma)							(mol/volt)
	040_VU107-A2	10		0.00110257	16.1514	-0.0296332	65.9185	0.019193	1.42668	1.67865	0.263971	7.82184	0.426095	4.46119	0.0784063	38.6076	0.671429	95.7432	0.688148	-24.3588	32.1142		040_VU107-A2	10	0.0089663	0.0001162	0.0132867	0.0001264	0.0058067	7.69e-05	0.0133491	0.0002239	2.59744	0.0037398		040_VU107-A2	10	040_VU107-A2	groundmass	IR119	Klaudia Kuiper	28.201	0.08	0.0047753	0.1	0.986385	0.1	1	1e-13
	041_VU107-A2	11.3		0.00275706	6.30078	0.146455	17.8344	0.0630276	0.545619	5.35767	0.138599	25.6205	0.114409	4.62976	0.0256907	40.0506	0.219828	96.8142	2.19626	15.7302	5.61093		041_VU107-A2	11.3	0.0089663	0.0001162	0.0132867	0.0001264	0.0058067	7.69e-05	0.0133491	0.0002239	2.59744	0.0037398		041_VU107-A2	11.3	041_VU107-A2	groundmass	IR119	Klaudia Kuiper	28.201	0.08	0.0047753	0.1	0.986385	0.1	1	1e-13
	042_VU107-A2	12.5		0.00189729	9.6779	0.29176	9.10839	0.0926188	0.4698	7.81888	0.104957	36.7352	0.0442932	4.62802	0.0175694	40.0357	0.150337	98.5023	3.20516	11.5233	2.09931		042_VU107-A2	12.5	0.0089663	0.0001162	0.0132867	0.0001264	0.0058067	7.69e-05	0.0133491	0.0002239	2.59744	0.0037398		042_VU107-A2	12.5	042_VU107-A2	groundmass	IR119	Klaudia Kuiper	28.201	0.08	0.0047753	0.1	0.986385	0.1	1	1e-13
	043_VU107-A2	13.7		0.00131058	11.6675	0.355155	9.10209	0.133218	0.493036	11.2484	0.176071	52.3874	0.126481	4.62427	0.021682	40.0036	0.185532	99.2881	4.61101	13.6186	2.47961		043_VU107-A2	13.7	0.0089663	0.0001162	0.0132867	0.0001264	0.0058067	7.69e-05	0.0133491	0.0002239	2.59744	0.0037398		043_VU107-A2	13.7	043_VU107-A2	groundmass	IR119	Klaudia Kuiper	28.201	0.08	0.0047753	0.1	0.986385	0.1	1	1e-13
	045_VU107-A2	15		0.00128943	16.4741	0.326252	6.70059	0.16918	0.490379	14.3103	0.132275	66.5776	0.080184	4.62652	0.016856	40.0229	0.144234	99.4419	5.86622	18.8607	2.52805		045_VU107-A2	15	0.0083796	0.0001216	0.0130809	9.72e-05	0.0057087	8.74e-05	0.0139254	0.0001584	2.45266	0.0033933		045_VU107-A2	15	045_VU107-A2	groundmass	IR119	Klaudia Kuiper	28.201	0.08	0.0047753	0.1	0.986385	0.1	1	1e-13
	046_VU107-A2	16		0.0011804	14.4405	0.250748	8.51704	0.167804	0.445284	14.228	0.161012	65.8245	0.120609	4.60222	0.0198857	39.8149	0.170178	99.476	5.83249	24.3989	4.15687		046_VU107-A2	16	0.0083796	0.0001216	0.0130809	9.72e-05	0.0057087	8.74e-05	0.0139254	0.0001584	2.45266	0.0033933		046_VU107-A2	16	046_VU107-A2	groundmass	IR119	Klaudia Kuiper	28.201	0.08	0.0047753	0.1	0.986385	0.1	1	1e-13
	047_VU107-A2	17		0.000841573	22.7791	0.253561	7.51664	0.186902	0.363314	15.6832	0.109422	72.7076	0.0434083	4.62046	0.0131064	39.971	0.112153	99.6634	6.42903	26.5959	3.99866		047_VU107-A2	17	0.0083796	0.0001216	0.0130809	9.72e-05	0.0057087	8.74e-05	0.0139254	0.0001584	2.45266	0.0033933		047_VU107-A2	17	047_VU107-A2	groundmass	IR119	Klaudia Kuiper	28.201	0.08	0.0047753	0.1	0.986385	0.1	1	1e-13
	048_VU107-A2	18		0.000864415	27.1487	0.229652	9.02132	0.181362	0.384786	15.2272	0.105149	70.6413	0.0363031	4.62259	0.013806	39.9892	0.118138	99.6417	6.24209	28.5111	5.1445		048_VU107-A2	18	0.0083796	0.0001216	0.0130809	9.72e-05	0.0057087	8.74e-05	0.0139254	0.0001584	2.45266	0.0033933		048_VU107-A2	18	048_VU107-A2	groundmass	IR119	Klaudia Kuiper	28.201	0.08	0.0047753	0.1	0.986385	0.1	1	1e-13
	050_VU107-A2	19		0.00118749	16.5865	0.27858	9.91354	0.158344	0.366962	13.1811	0.11248	61.1073	0.0348129	4.60995	0.0140612	39.881	0.120329	99.4372	5.40333	20.3453	4.03414		050_VU107-A2	19	0.0080069	0.0001021	0.0126452	9.8e-05	0.0056928	0.0001053	0.0165252	0.0001714	2.42893	0.0049789		050_VU107-A2	19	050_VU107-A2	groundmass	IR119	Klaudia Kuiper	28.201	0.08	0.0047753	0.1	0.986385	0.1	1	1e-13
	051_VU107-A2	20	4	0.000935375	22.511	0.250733	11.0222	0.13998	0.47869	11.8712	0.133078	55.029	0.0522484	4.61284	0.0169274	39.9058	0.144854	99.5099	4.86637	20.3585	4.48822		051_VU107-A2	20	0.0080069	0.0001021	0.0126452	9.8e-05	0.0056928	0.0001053	0.0165252	0.0001714	2.42893	0.0049789		051_VU107-A2	20	051_VU107-A2	groundmass	IR119	Klaudia Kuiper	28.201	0.08	0.0047753	0.1	0.986385	0.1	1	1e-13
	052_VU107-A2	21	4	0.000820211	26.595	0.280502	9.28145	0.125337	0.437645	10.4844	0.109972	48.4808	0.0541022	4.60207	0.0167934	39.8136	0.143715	99.5219	4.29785	16.0719	2.98362		052_VU107-A2	21	0.0080069	0.0001021	0.0126452	9.8e-05	0.0056928	0.0001053	0.0165252	0.0001714	2.42893	0.0049789		052_VU107-A2	21	052_VU107-A2	groundmass	IR119	Klaudia Kuiper	28.201	0.08	0.0047753	0.1	0.986385	0.1	1	1e-13
	053_VU107-A2	22	4	0.000868857	21.8582	0.294443	8.11364	0.11283	0.489878	9.4696	0.114675	43.7537	0.0404542	4.59473	0.0163899	39.7507	0.140267	99.4416	3.88185	13.829	2.24429		053_VU107-A2	22	0.0080069	0.0001021	0.0126452	9.8e-05	0.0056928	0.0001053	0.0165252	0.0001714	2.42893	0.0049789		053_VU107-A2	22	053_VU107-A2	groundmass	IR119	Klaudia Kuiper	28.201	0.08	0.0047753	0.1	0.986385	0.1	1	1e-13
	055_VU107-A2	23.5	4	0.00140121	13.0462	0.327731	9.43672	0.135747	0.409106	11.3623	0.111062	52.5783	0.0458385	4.59212	0.0146476	39.7285	0.125358	99.2349	4.65771	14.9076	2.81377		055_VU107-A2	23.5	0.0081818	9.27e-05	0.0128838	0.0001434	0.0057695	0.0001142	0.0303039	0.0002546	2.5056	0.0043706		055_VU107-A2	23.5	055_VU107-A2	groundmass	IR119	Klaudia Kuiper	28.201	0.08	0.0047753	0.1	0.986385	0.1	1	1e-13
	056_VU107-A2	25	4	0.00103214	17.7591	0.369313	6.72421	0.131959	0.370362	11.0203	0.113911	50.9164	0.0490628	4.59415	0.0151294	39.7458	0.12948	99.4333	4.51752	12.8309	1.7258		056_VU107-A2	25	0.0081818	9.27e-05	0.0128838	0.0001434	0.0057695	0.0001142	0.0303039	0.0002546	2.5056	0.0043706		056_VU107-A2	25	056_VU107-A2	groundmass	IR119	Klaudia Kuiper	28.201	0.08	0.0047753	0.1	0.986385	0.1	1	1e-13
	057_VU107-A2	27	4	0.00163926	12.5325	0.378955	7.09289	0.153732	0.315419	12.7717	0.108771	58.9947	0.0444449	4.58241	0.0144441	39.6453	0.123622	99.2024	5.23548	14.4918	2.05601		057_VU107-A2	27	0.0081818	9.27e-05	0.0128838	0.0001434	0.0057695	0.0001142	0.0303039	0.0002546	2.5056	0.0043706		057_VU107-A2	27	057_VU107-A2	groundmass	IR119	Klaudia Kuiper	28.201	0.08	0.0047753	0.1	0.986385	0.1	1	1e-13
	058_VU107-A2	29.5	4	0.00139339	12.725	0.494787	5.27514	0.15472	0.394357	12.9508	0.118336	59.8444	0.0436527	4.59105	0.0141883	39.7193	0.121427	99.3514	5.30886	11.2547	1.18771		058_VU107-A2	29.5	0.0081818	9.27e-05	0.0128838	0.0001434	0.0057695	0.0001142	0.0303039	0.0002546	2.5056	0.0043706		058_VU107-A2	29.5	058_VU107-A2	groundmass	IR119	Klaudia Kuiper	28.201	0.08	0.0047753	0.1	0.986385	0.1	1	1e-13
	060_VU107-A2	35	4	0.0028314	7.224	0.799568	3.05148	0.209239	0.338417	17.3904	0.104489	80.4944	0.0339294	4.58297	0.0122884	39.6501	0.105171	99.0095	7.12872	9.35211	0.571091		060_VU107-A2	35	0.008228	0.000111	0.0131512	0.0001251	0.00608	6.87e-05	0.0383329	0.0002577	2.58332	0.0046782		060_VU107-A2	35	060_VU107-A2	groundmass	IR119	Klaudia Kuiper	28.201	0.08	0.0047753	0.1	0.986385	0.1	1	1e-13
	061_VU107-A2	50	4	0.0336026	1.17536	1.68295	2.03352	0.265742	0.268705	21.7176	0.107807	109.339	0.0382652	4.57811	0.0152057	39.6085	0.130142	90.9287	8.90236	5.54866	0.225983		061_VU107-A2	50	0.008228	0.000111	0.0131512	0.0001251	0.00608	6.87e-05	0.0383329	0.0002577	2.58332	0.0046782		061_VU107-A2	50	061_VU107-A2	groundmass	IR119	Klaudia Kuiper	28.201	0.08	0.0047753	0.1	0.986385	0.1	1	1e-13
	062_VU107-A2	80	4	0.0839869	0.621078	4.65115	0.988019	0.168836	0.391121	12.7602	0.110665	83.176	0.0430688	4.5823	0.0273366	39.6444	0.233963	70.2805	5.22956	1.17939	0.023451		062_VU107-A2	80	0.008228	0.000111	0.0131512	0.0001251	0.00608	6.87e-05	0.0383329	0.0002577	2.58332	0.0046782		062_VU107-A2	80	062_VU107-A2	groundmass	IR119	Klaudia Kuiper	28.201	0.08	0.0047753	0.1	0.986385	0.1	1	1e-13
	063_VU107-A2	16	4	0.0032745	6.11362	0.523277	4.91585	0.160971	0.344975	13.4171	0.112192	62.471	0.0381432	4.58554	0.0140714	39.6721	0.12043	98.4826	5.5	11.0251	1.08424		063_VU107-A2	16	0.008228	0.000111	0.0131512	0.0001251	0.00608	6.87e-05	0.0383329	0.0002577	2.58332	0.0046782		063_VU107-A2	16	063_VU107-A2	groundmass	IR119	Klaudia Kuiper	28.201	0.08	0.0047753	0.1	0.986385	0.1	1	1e-13
			S	0.144217	0.728046	12.1559	1.00192	2.93074	0.0922663	243.949	0.0282151	1164.5	0.0140146
	Information on Analysis and Constants Used in Calculations									Results		40(a)/36(a)	± 2s	40(r)/39(k)	± 2s	Age	± 2s	MSWD	39Ar(k)	K/Ca	± 2s
																(Ma)			(%,n)
	Sample = 040_VU107-A2				Age Equations = Min et al. (2000)					Age Plateau				4.59013	0.00578061	39.7114	0.0928458	1.56666	59.5263	1.25536	0.44401
	Material = groundmass				Negative Intensities = Allowed										0.00125936		0.00233801	0.109581	11
	Location = IR119				Decay Constant 40K = 5.460 ± 0.053 E-10 1/a					Full External Error							0.829976	1.89443	2σ Confidence Limit
	Analyst = Klaudia Kuiper				Decay Constant 39Ar = 2.940 ± 0.016 E-07 1/h					Analytical Error							0.0494722	1.25166	Error Magnification
	Project = VU107				Decay Constant 37Ar = 8.230 ± 0.012 E-04 1/h
	Mass Discrimination Law = LIN				Decay Constant 36Cl = 2.257 ± 0.015 E-06 1/a					Total Fusion Age				4.60026	0.00389803	39.7981	0.0855123		20	8.62908	0.172981
	Irradiation = VU107				Decay Activity 40K(EC,β⁺) = 3.310 ± 0.030 1/gs										0.00084735		0.00214865
	J = 0.00477530 ± 0.00000478				Decay Activity 40K(β⁻) = 27.890 ± 0.150 1/gs					Full External Error							0.830964
	FCs = 28.201 ± 0.023 Ma				Atmospheric Ratio 40/36(a) = 298.56 ± 0.31					Analytical Error							0.033359
	IGSN = Undefined				Atmospheric Ratio 38/36(a) = 0.1885 ± 0.0003
	Preferred Age = Undefined				Production Ratio 39/37(ca) = 0.000673 ± 0.000004					Normal Isochron Error Chron		291.749	9.80401	4.60411	0.0106975	39.831	0.120791	5.91941	59.5263
	Classification = Undefined				Production Ratio 36/37(ca) = 0.000264 ± 0.000002								0.0336043		0.00232348		0.00303259	2.5925e-08	11
	Experiment Type = Undefined				Production Ratio 40/39(k) = 0.000860 ± 0.000070					Full External Error							0.836002	1.94281	2σ Confidence Limit
	Extraction Method = Undefined				Production Ratio 38/39(k) = 0.012110 ± 0.000030					Analytical Error							0.0915467	2.43298	Error Magnification
	Heating = 720 sec				Production Ratio 36/38(cl) = 262.80 ± 1.71												1		Number of Iterations
	Isolation = 18.00 min				Scaling Ratio K/Ca = 0.430												1.25026e-06		Convergence
	Instrument = HELIX				Abundance Ratio 40K/K = 1.1700 ± 0.0100 E-04
	Lithology = Undefined				Atomic Weight K = 39.0983 ± 0.0001 g					Inverse Isochron		296.074	5.12848	4.59124	0.00620663	39.7209	0.0948539	1.58315	59.5263
	Lat-Lon = Undefined - Undefined												0.0173216		0.00135184		0.00238801	0.11376	11
	Feature = Undefined									Full External Error							0.830397	1.94281	2σ Confidence Limit
										Analytical Error							0.0531179	1.25823	Error Magnification
																	2		Number of Iterations
																	0.00012335		Convergence
																	0.289852		Spreading Factor
[truncated: 39 more columns]

## Sheet: Hidden Data
Double Line Plot Age Plateau			Double Line Plot K/Ca Plateau			X-Y Plot Normal Isochron		X-Y Plot Inverse Isochron		Error Ellipses Normal Isochron		Error Ellipses Inverse Isochron
Ar39k%	Line 1	Line 2	Ar39k%	Line 1	Line 2	X-axis	Y-axis	X-axis	Y-axis	X-axis	Y-axis	X-axis	Y-axis
0	37.9361	39.279	0	-56.473	7.75537	1511.78	7042.92	0.214653	0.000141987			0.216805	0.000143016
0.688148	37.9361	39.279	0.688148	-56.473	7.75537	1970.86	9423.18	0.20915	0.000106121			0.216732	0.000131188
0.688148	40.2704	39.8307	0.688148	21.3411	10.1193	4295.35	20177.5	0.212878	4.95601e-05			0.216517	0.000120095
2.88441	40.2704	39.8307	2.88441	21.3411	10.1193	9243.86	43044.7	0.21475	2.32317e-05			0.216175	0.000110494
2.88441	39.8853	40.186	2.88441	9.42397	13.6226	11892.4	55318.9	0.214978	1.8077e-05			0.215729	0.00010304
6.08956	39.8853	40.186	6.08956	9.42397	13.6226	12769.5	59066.6	0.216188	1.69301e-05			0.21521	9.82397e-05
6.08956	40.1891	39.8181	6.08956	16.0982	11.139	20245.7	93843.3	0.21574	1.06561e-05			0.214653	9.64207e-05
10.7006	40.1891	39.8181	10.7006	16.0982	11.139	18944.1	87869.2	0.215594	1.13805e-05			0.214096	9.77069e-05
10.7006	39.8786	40.1671	10.7006	16.3326	21.3887	11832.7	54846.7	0.215741	1.82326e-05			0.213577	0.000102011
16.5668	39.8786	40.1671	16.5668	16.3326	21.3887	13657.7	63299.6	0.215764	1.57979e-05			0.213131	0.000109039
16.5668	39.985	39.6447	16.5668	28.5558	20.242	14050.9	64961.8	0.216295	1.53937e-05			0.212789	0.000118312
22.3993	39.985	39.6447	22.3993	28.5558	20.242	11969.6	55295.4	0.216466	1.80847e-05			0.212574	0.000129199
22.3993	39.8589	40.0832	22.3993	22.5972	30.5946	8642.38	39985.4	0.216138	2.50091e-05			0.212501	0.000140957
28.8283	39.8589	40.0832	28.8283	22.5972	30.5946	11790.7	54466.9	0.216475	1.83598e-05			0.212574	0.000152786
28.8283	40.1073	39.871	28.8283	33.6556	23.3666	8297.4	38320.6	0.216526	2.60956e-05			0.212789	0.000163878
35.0704	40.1073	39.871	35.0704	33.6556	23.3666	10255.7	47382.9	0.216443	2.11047e-05			0.213131	0.000173479
35.0704	39.7607	40.0014	35.0704	16.3112	24.3794	6636.56	30713.7	0.216078	3.25588e-05			0.213577	0.000180933
40.4737	39.7607	40.0014	40.4737	16.3112	24.3794	654.933	3296.92	0.19865	0.000303314			0.214096	0.000185734
40.4737	40.0506	39.7609	40.4737	24.8467	15.8703	154.147	1004.91	0.153394	0.000995118			0.214653	0.000187553
45.3401	40.0506	39.7609	45.3401	24.8467	15.8703	4277.82	19914.7	0.214807	5.02143e-05			0.21521	0.000186266
45.3401	39.6699	39.9573	45.3401	13.0883	19.0555							0.215729	0.000181963
49.6379	39.6699	39.9573	49.6379	13.0883	19.0555							0.216175	0.000174934
49.6379	39.891	39.6105	49.6379	16.0733	11.5847							0.216517	0.000165661
53.5198	39.891	39.6105	53.5198	16.0733	11.5847							0.216732	0.000154774
53.5198	39.6031	39.8538	53.5198	12.0938	17.7214							0.216805	0.000143016
58.1775	39.6031	39.8538	58.1775	12.0938	17.7214
58.1775	39.8753	39.6163	58.1775	14.5567	11.1051							0.209902	0.000106276
62.695	39.8753	39.6163	62.695	14.5567	11.1051							0.209877	0.000102757
62.695	39.5217	39.769	62.695	12.4358	16.5478							0.209801	9.94677e-05
67.9305	39.5217	39.769	67.9305	12.4358	16.5478							0.209682	9.66316e-05
67.9305	39.8407	39.5979	67.9305	12.4425	10.067							0.209526	9.44422e-05
73.2394	39.8407	39.5979	73.2394	12.4425	10.067							0.209345	9.30488e-05
73.2394	39.5449	39.7553	73.2394	8.78102	9.9232							0.20915	9.25462e-05
80.3681	39.5449	39.7553	80.3681	8.78102	9.9232							0.208956	9.29687e-05
80.3681	39.7387	39.4784	80.3681	5.77464	5.32267							0.208774	9.42875e-05
89.2704	39.7387	39.4784	89.2704	5.77464	5.32267							0.208619	9.64128e-05
89.2704	39.4104	39.8784	89.2704	1.15594	1.20284							0.208499	9.91998e-05
94.5	39.4104	39.8784	94.5	1.15594	1.20284							0.208424	0.000102458
94.5	39.7925	39.5517	94.5	12.1094	9.9409							0.208398	0.000105967
100	39.7925	39.5517	100	12.1094	9.9409							0.208424	0.000109485
												0.208499	0.000112775
												0.208619	0.000115611
												0.208774	0.0001178
												0.208956	0.000119194
												0.20915	0.000119696
												0.209345	0.000119274
												0.209526	0.000117955
												0.209682	0.00011583
												0.209801	0.000113043
												0.209877	0.000109784
												0.209902	0.000106276
												0.213363	4.95772e-05
												0.213346	4.69869e-05
												0.213298	4.45719e-05
												0.213221	4.24968e-05
												0.21312	4.09032e-05
												0.213003	3.98994e-05
												0.212878	3.9554e-05
												0.212752	3.98906e-05
												0.212635	4.0886e-05
												0.212535	4.24727e-05
												0.212458	4.45423e-05
												0.212409	4.69538e-05
												0.212393	4.9543e-05
												0.212409	5.21334e-05
												0.212458	5.45484e-05
												0.212535	5.66234e-05
												0.212635	5.82171e-05
												0.212752	5.92208e-05
												0.212878	5.95662e-05
												0.213003	5.92297e-05
												0.21312	5.82342e-05
												0.213221	5.66476e-05
												0.213298	5.4578e-05
												0.213346	5.21664e-05
												0.213363	4.95772e-05
												0.215681	2.3266e-05
												0.21565	2.17512e-05
												0.215557	2.03373e-05
												0.215409	1.91206e-05
												0.215216	1.81841e-05
												0.214991	1.75916e-05
												0.21475	1.73835e-05
												0.214509	1.75739e-05
												0.214285	1.81498e-05
												0.214092	1.90721e-05
												0.213944	2.02779e-05
												0.213851	2.16849e-05
												0.213819	2.31973e-05
												0.213851	2.47121e-05
												0.213944	2.6126e-05
												0.214092	2.73427e-05
												0.214285	2.82792e-05
												0.214509	2.88717e-05
												0.21475	2.90798e-05
												0.214991	2.88894e-05
												0.215216	2.83135e-05
												0.215409	2.73912e-05
												0.215557	2.61854e-05
												0.21565	2.47784e-05
												0.215681	2.3266e-05
												0.215644	1.8092e-05
												0.215621	1.6439e-05
												0.215554	1.48976e-05
												0.215449	1.35729e-05
												0.215311	1.25551e-05
												0.215151	1.19136e-05
												0.214978	1.16922e-05
												0.214806	1.19059e-05
												0.214646	1.25401e-05
												0.214508	1.35516e-05
												0.214402	1.48716e-05
												0.214336	1.641e-05
												0.214313	1.8062e-05
												0.214336	1.9715e-05
												0.214402	2.12564e-05
												0.214508	2.25811e-05
												0.214646	2.35989e-05
												0.214806	2.42404e-05
												0.214978	2.44618e-05
												0.215151	2.42482e-05
												0.215311	2.36139e-05
												0.215449	2.26024e-05
												0.215554	2.12824e-05
												0.215621	1.97441e-05
												0.215644	1.80921e-05
												0.217058	1.69545e-05
												0.217029	1.56122e-05
												0.216942	1.43598e-05
												0.216803	1.32824e-05
												0.216623	1.24537e-05
												0.216413	1.193e-05
												0.216188	1.1747e-05
												0.215963	1.19173e-05
												0.215753	1.24292e-05
												0.215573	1.32478e-05
												0.215435	1.43173e-05
												0.215348	1.55649e-05
												0.215318	1.69056e-05
												0.215348	1.82479e-05
												0.215435	1.95004e-05
												0.215573	2.05777e-05
												0.215753	2.14064e-05
												0.215963	2.19301e-05
												0.216188	2.21131e-05
												0.216413	2.19428e-05
												0.216623	2.14309e-05
												0.216803	2.06123e-05
												0.216942	1.95428e-05
												0.217029	1.82952e-05
												0.217058	1.69546e-05
												0.216248	1.06595e-05
												0.216231	9.29382e-06
												0.21618	8.02099e-06
												0.216099	6.92774e-06
												0.215994	6.08857e-06
												0.215871	5.56066e-06
												0.21574	5.38e-06
												0.215608	5.55889e-06
												0.215486	6.08515e-06
												0.215381	6.9229e-06
												0.2153	8.01507e-06
												0.215249	9.28721e-06
												0.215232	1.06526e-05
												0.215249	1.20183e-05
												0.2153	1.32911e-05
												0.215381	1.43844e-05
												0.215486	1.52236e-05
												0.215608	1.57515e-05
												0.21574	1.59321e-05
												0.215871	1.57532e-05
												0.215994	1.5227e-05
												0.216099	1.43892e-05
												0.21618	1.32971e-05
												0.216231	1.20249e-05
												0.216248	1.06595e-05
												0.216074	1.13832e-05
												0.216057	9.66272e-06
												0.216009	8.05926e-06
												0.215933	6.68214e-06
												0.215834	5.62521e-06
												0.215718	4.9605e-06
												0.215594	4.7333e-06
												0.21547	4.9591e-06
												0.215354	5.62251e-06
												0.215255	6.67832e-06
												0.215179	8.05458e-06
												0.215131	9.6575e-06
												0.215114	1.13778e-05
												0.215131	1.30984e-05
												0.215179	1.47018e-05
												0.215255	1.60789e-05
												0.215354	1.71359e-05
												0.21547	1.78006e-05
												0.215594	1.80278e-05
												0.215718	1.7802e-05
												0.215834	1.71386e-05
												0.215933	1.60828e-05
												0.216009	1.47065e-05
												0.216057	1.31036e-05
												0.216074	1.13833e-05
												0.216249	1.82364e-05
												0.216232	1.65664e-05
												0.216181	1.50099e-05
												0.2161	1.3673e-05
												0.215995	1.26469e-05
												0.215873	1.20014e-05
												0.215741	1.17806e-05
												0.21561	1.19995e-05
												0.215487	1.26431e-05
												0.215382	1.36677e-05
												0.215301	1.50034e-05
												0.21525	1.65591e-05
												0.215233	1.82289e-05
												0.21525	1.98989e-05
												0.215301	2.14554e-05
												0.215382	2.27923e-05
												0.215487	2.38184e-05
												0.21561	2.44639e-05
												0.215741	2.46847e-05
												0.215873	2.44658e-05
												0.215995	2.38222e-05
												0.2161	2.27976e-05
												0.216181	2.14619e-05
												0.216232	1.99062e-05
												0.216249	1.82364e-05
												0.216381	1.58039e-05
												0.21636	1.38215e-05
												0.216298	1.19737e-05
												0.2162	1.03866e-05
												0.216072	9.16818e-06
												0.215923	8.4016e-06
												0.215764	8.13907e-06
												0.215604	8.39847e-06
												0.215455	9.16214e-06
												0.215327	1.0378e-05
												0.215229	1.19632e-05
												0.215168	1.38098e-05
												0.215147	1.57919e-05
												0.215168	1.77743e-05
												0.215229	1.96221e-05
												0.215327	2.12092e-05
												0.215455	2.24276e-05
												0.215604	2.31942e-05
												0.215764	2.34567e-05
												0.215923	2.31973e-05
												0.216072	2.24337e-05
												0.2162	2.12178e-05
												0.216298	1.96325e-05
												0.21636	1.7786e-05
												0.216381	1.58039e-05
												0.216825	1.5401e-05
												0.216807	1.30701e-05
												0.216754	1.08975e-05
												0.21667	9.03138e-06
												0.21656	7.5988e-06
												0.216432	6.69742e-06
												0.216295	6.38868e-06
												0.216157	6.69361e-06
												0.21603	7.59143e-06
												0.21592	9.02096e-06
												0.215836	1.08848e-05
												0.215783	1.30559e-05
												0.215764	1.53863e-05
												0.215783	1.77172e-05
												0.215836	1.98898e-05
												0.21592	2.17559e-05
												0.21603	2.31885e-05
												0.216157	2.40899e-05
												0.216295	2.43986e-05
												0.216432	2.40937e-05
												0.21656	2.31959e-05
												0.21667	2.17663e-05
												0.216754	1.99025e-05
												0.216807	1.77314e-05
												0.216825	1.5401e-05
												0.216992	1.80896e-05
												0.216974	1.58409e-05
												0.216922	1.37451e-05
												0.216838	1.19451e-05
												0.216729	1.05634e-05
												0.216602	9.69436e-06
												0.216466	9.39708e-06
												0.216329	9.69184e-06
												0.216202	1.05586e-05
												0.216093	1.19382e-05
												0.21601	1.37367e-05
												0.215957	1.58314e-05
												0.215939	1.80798e-05
												0.215957	2.03285e-05
												0.21601	2.24243e-05
												0.216093	2.42243e-05
												0.216202	2.56059e-05
												0.216329	2.6475e-05
												0.216466	2.67723e-05
												0.216602	2.64775e-05
												0.216729	2.56108e-05
												0.216838	2.42312e-05
												0.216922	2.24327e-05
												0.216974	2.03379e-05
												0.216992	1.80896e-05
												0.216658	2.50179e-05
												0.21664	2.32157e-05
												0.216588	2.15357e-05
												0.216505	2.00925e-05
												0.216398	1.89843e-05
												0.216273	1.82867e-05
												0.216138	1.80472e-05
												0.216004	1.82821e-05
												0.215878	1.89755e-05
												0.215771	2.00801e-05
												0.215688	2.15205e-05
												0.215636	2.31988e-05
												0.215619	2.50003e-05
												0.215636	2.68025e-05
												0.215688	2.84825e-05
												0.215771	2.99257e-05
												0.215878	3.10339e-05
												0.216004	3.17315e-05
												0.216138	3.1971e-05
												0.216273	3.17361e-05
												0.216398	3.10427e-05
												0.216505	2.99381e-05
												0.216588	2.84977e-05
												0.21664	2.68194e-05
												0.216658	2.50179e-05
												0.217012	1.83669e-05
												0.216994	1.65016e-05
												0.21694	1.4763e-05
												0.216855	1.32694e-05
												0.216744	1.21228e-05
												0.216614	1.14012e-05
												0.216475	1.11538e-05
												0.216336	1.13975e-05
												0.216206	1.21156e-05
												0.216095	1.32593e-05
												0.21601	1.47506e-05
												0.215956	1.64878e-05
												0.215938	1.83526e-05
												0.215956	2.02179e-05
												0.21601	2.19566e-05
												0.216095	2.34501e-05
												0.216206	2.45967e-05
												0.216336	2.53183e-05
												0.216475	2.55657e-05
												0.216614	2.5322e-05
												0.216744	2.46039e-05
												0.216855	2.34602e-05
												0.21694	2.19689e-05
												0.216994	2.02317e-05
												0.217012	1.83669e-05
												0.217034	2.61044e-05
												0.217017	2.43001e-05
												0.216966	2.26181e-05
												0.216885	2.11731e-05
												0.21678	2.00636e-05
												0.216657	1.93652e-05
												0.216526	1.91254e-05
												0.216394	1.93606e-05
												0.216271	2.00548e-05
												0.216166	2.11607e-05
												0.216085	2.26029e-05
												0.216034	2.42831e-05
												0.216017	2.60868e-05
												0.216034	2.78911e-05
												0.216085	2.95731e-05
												0.216166	3.10181e-05
												0.216271	3.21276e-05
												0.216394	3.2826e-05
												0.216526	3.30658e-05
												0.216657	3.28306e-05
												0.21678	3.21364e-05
												0.216885	3.10305e-05
												0.216966	2.95883e-05
												0.217017	2.79081e-05
												0.217034	2.61044e-05
												0.216989	2.11111e-05
												0.21697	1.95757e-05
												0.216915	1.81445e-05
												0.216829	1.69151e-05
												0.216716	1.59712e-05
												0.216584	1.53771e-05
												0.216443	1.51733e-05
												0.216301	1.53738e-05
												0.216169	1.59648e-05
												0.216056	1.69061e-05
												0.21597	1.81335e-05
												0.215915	1.95634e-05
												0.215896	2.10983e-05
												0.215915	2.26336e-05
												0.21597	2.40648e-05
												0.216056	2.52942e-05
												0.216169	2.62382e-05
												0.216301	2.68322e-05
												0.216443	2.7036e-05
												0.216584	2.68356e-05
												0.216716	2.62446e-05
												0.216829	2.53033e-05
												0.216915	2.40759e-05
												0.21697	2.2646e-05
												0.216989	2.11111e-05
												0.216553	3.25656e-05
												0.216537	3.12491e-05
												0.216489	3.00218e-05
												0.216414	2.89675e-05
												0.216316	2.81578e-05
												0.216201	2.76481e-05
												0.216078	2.74731e-05
												0.215955	2.76446e-05
												0.215841	2.8151e-05
												0.215743	2.89578e-05
												0.215667	3.001e-05
												0.21562	3.12359e-05
												0.215603	3.25519e-05
												0.21562	3.38684e-05
												0.215667	3.50957e-05
												0.215743	3.61501e-05
												0.215841	3.69597e-05
												0.215955	3.74694e-05
												0.216078	3.76445e-05
												0.216201	3.7473e-05
												0.216316	3.69666e-05
												0.216414	3.61598e-05
												0.216489	3.51076e-05
												0.216537	3.38817e-05
												0.216553	3.25656e-05
												0.199105	0.000303391
												0.199089	0.000301517
												0.199044	0.000299766
												0.198972	0.000298256
												0.198877	0.00029709
												0.198768	0.000296349
												0.19865	0.000296083
												0.198533	0.000296309
												0.198423	0.000297013
												0.198329	0.000298146
												0.198257	0.000299631
												0.198211	0.000301367
												0.198196	0.000303236
												0.198211	0.00030511
												0.198257	0.000306862
												0.198329	0.000308372
												0.198423	0.000309537
												0.198533	0.000310278
												0.19865	0.000310545
												0.198768	0.000310318
												0.198877	0.000309615
												0.198972	0.000308482
												0.199044	0.000306997
												0.199089	0.00030526
												0.199105	0.000303391
												0.153758	0.000995429
												0.153746	0.000992164
												0.15371	0.0009891
												0.153652	0.000986447
												0.153576	0.000984384
												0.153488	0.000983052
												0.153394	0.000982543
												0.1533	0.000982891
												0.153212	0.000984072
												0.153136	0.000986006
												0.153078	0.000988561
												0.153042	0.000991563
												0.15303	0.000994806
												0.153042	0.000998072
												0.153078	0.00100114
												0.153136	0.00100379
												0.153212	0.00100585
												0.1533	0.00100718
												0.153394	0.00100769
												0.153488	0.00100734
												0.153576	0.00100616
												0.153652	0.00100423
												0.15371	0.00100167
												0.153746	0.000998673
												0.153758	0.000995429
												0.215317	5.02266e-05
												0.215299	4.85661e-05
												0.215248	4.70179e-05
												0.215168	4.56875e-05
												0.215062	4.46657e-05
												0.214939	4.40219e-05
												0.214807	4.38002e-05
												0.214676	4.40155e-05
												0.214553	4.46533e-05
												0.214447	4.56701e-05
												0.214367	4.69965e-05
												0.214316	4.85422e-05
												0.214298	5.02019e-05
												0.214316	5.18624e-05
												0.214367	5.34106e-05
												0.214447	5.4741e-05
												0.214553	5.57629e-05
												0.214676	5.64066e-05
												0.214807	5.66284e-05
												0.214939	5.6413e-05
												0.215062	5.57752e-05
												0.215168	5.47585e-05
												0.215248	5.3432e-05
												0.215299	5.18863e-05
												0.215317	5.02266e-05
