# Supplementary material for: Exploring a link between the Middle Eocene Climatic Optimum and Neotethys continental arc flare-up
Source: Copernicus journal article supplement (doi:10.5194/cp-17-229-2021), 2021-01-18
Supplement: Supplementary file 18 [file S27_VU107-A2_2.xls]

## Sheet: Summary Table
	Relative Abundances			36Ar [fA]	%1s	37Ar [fA]	%1s	38Ar [fA]	%1s	39Ar [fA]	%1s	40Ar [fA]	%1s	40(r)/39(k)	± 2s	Age	± 2s	40Ar(r)	39Ar(k)	K/Ca	± 2s		Procedure Blanks		36Ar [fA]	1s	37Ar [fA]	1s	38Ar [fA]	1s	39Ar [fA]	1s	40Ar [fA]	1s		Sample Parameters		Sample	Material	Location	Analyst	Standard	%1s	J	%1s	MDF	%1s	Volume Ratio	Sensitivity
																(Ma)		(%)	(%)																							(in Ma)							(mol/volt)
	032_VU107-A2_2	14	4	0.0176481	1.48131	1.50193	2.02881	0.443582	0.407466	37.8113	0.258485	177.653	0.118322	4.56144	0.0263988	39.4659	0.225959	97.0824	6.65168	10.825	0.442789		032_VU107-A2_2	14	0.0110779	0.0001159	0.0109894	7.07e-05	0.0058506	7.72e-05	0.22116	0.0598001	3.47817	0.0095742		032_VU107-A2_2	14	032_VU107-A2_2	IR119	groundmass	Klaudia Kuiper	28.201	0.08	0.0047753	0.1	0.985339	0.1	1	1e-13
	033_VU107-A2_2	15.5	4	0.00523352	4.42314	1.13258	2.86036	0.457716	0.392084	38.4086	0.305283	177.244	0.142532	4.57558	0.0310895	39.5869	0.266092	99.1502	6.7568	14.5821	0.838938		033_VU107-A2_2	15.5	0.0110779	0.0001159	0.0109894	7.07e-05	0.0058506	7.72e-05	0.22116	0.0598001	3.47817	0.0095742		033_VU107-A2_2	15.5	033_VU107-A2_2	IR119	groundmass	Klaudia Kuiper	28.201	0.08	0.0047753	0.1	0.985339	0.1	1	1e-13
	035_VU107-A2_2	17	4	0.00450059	4.94432	1.07317	4.06246	0.536451	0.246543	45.0165	0.243899	207.499	0.0763574	4.58063	0.0236134	39.6301	0.202099	99.3745	7.9193	18.0371	1.46814		035_VU107-A2_2	17	0.0101652	7.73e-05	0.0112478	0.0001684	0.005966	0.000112	0.240403	0.0369432	3.07669	0.0031659		035_VU107-A2_2	17	035_VU107-A2_2	IR119	groundmass	Klaudia Kuiper	28.201	0.08	0.0047753	0.1	0.985339	0.1	1	1e-13
	036_VU107-A2_2	18.5	4	0.00320788	5.8097	0.781201	5.05377	0.506744	0.325071	42.7427	0.220193	196.273	0.116809	4.5702	0.0229564	39.5408	0.196486	99.5247	7.51932	23.5268	2.38024		036_VU107-A2_2	18.5	0.0101652	7.73e-05	0.0112478	0.0001684	0.005966	0.000112	0.240403	0.0369432	3.07669	0.0031659		036_VU107-A2_2	18.5	036_VU107-A2_2	IR119	groundmass	Klaudia Kuiper	28.201	0.08	0.0047753	0.1	0.985339	0.1	1	1e-13
	037_VU107-A2_2	20	4	0.0037785	5.62092	0.834405	5.64473	0.543858	0.342282	45.9741	0.225776	210.987	0.0950867	4.56534	0.0225568	39.4992	0.193071	99.4777	8.08779	23.6919	2.67683		037_VU107-A2_2	20	0.0101652	7.73e-05	0.0112478	0.0001684	0.005966	0.000112	0.240403	0.0369432	3.07669	0.0031659		037_VU107-A2_2	20	037_VU107-A2_2	IR119	groundmass	Klaudia Kuiper	28.201	0.08	0.0047753	0.1	0.985339	0.1	1	1e-13
	039_VU107-A2_2	23	4	0.00523681	4.64388	1.4621	2.58666	0.696111	0.275207	58.541	0.162413	268.083	0.0652928	4.55389	0.0161482	39.4012	0.138225	99.441	10.2985	17.2165	0.892421		039_VU107-A2_2	23	0.0095802	0.0001052	0.0111733	9.85e-05	0.0063337	9.79e-05	0.253288	0.0039356	3.11407	0.0047973		039_VU107-A2_2	23	039_VU107-A2_2	IR119	groundmass	Klaudia Kuiper	28.201	0.08	0.0047753	0.1	0.985339	0.1	1	1e-13
	040_VU107-A2_2	26	4	0.00544458	5.11696	1.88269	2.19443	0.626602	0.31658	52.9417	0.203386	241.885	0.0630653	4.54024	0.0196017	39.2844	0.167796	99.3705	9.31341	12.0914	0.53295		040_VU107-A2_2	26	0.0095802	0.0001052	0.0111733	9.85e-05	0.0063337	9.79e-05	0.253288	0.0039356	3.11407	0.0047973		040_VU107-A2_2	26	040_VU107-A2_2	IR119	groundmass	Klaudia Kuiper	28.201	0.08	0.0047753	0.1	0.985339	0.1	1	1e-13
	041_VU107-A2_2	31		0.0115772	2.41307	3.48606	1.32786	0.876568	0.263071	73.5969	0.161889	337.008	0.0652813	4.53516	0.0160172	39.2409	0.137115	99.0371	12.9469	9.07776	0.242866		041_VU107-A2_2	31	0.0095802	0.0001052	0.0111733	9.85e-05	0.0063337	9.79e-05	0.253288	0.0039356	3.11407	0.0047973		041_VU107-A2_2	31	041_VU107-A2_2	IR119	groundmass	Klaudia Kuiper	28.201	0.08	0.0047753	0.1	0.985339	0.1	1	1e-13
	043_VU107-A2_2	45		0.0382362	1.10928	4.50714	1.49337	0.930913	0.265688	77.1727	0.154913	366.169	0.0547188	4.60079	0.0155265	39.8027	0.132874	96.9613	13.5759	7.36231	0.221073		043_VU107-A2_2	45	0.0099279	0.0001391	0.0113157	0.0001141	0.0082269	9.88e-05	0.412718	0.0038595	3.8476	0.0048517		043_VU107-A2_2	45	043_VU107-A2_2	IR119	groundmass	Klaudia Kuiper	28.201	0.08	0.0047753	0.1	0.985339	0.1	1	1e-13
	044_VU107-A2_2	80		0.120733	0.577107	6.80141	1.16623	0.724417	0.262291	59.4472	0.16308	324.069	0.0517486	4.85355	0.0182506	41.9645	0.156002	89.0267	10.4573	3.75809	0.088509		044_VU107-A2_2	80	0.0099279	0.0001391	0.0113157	0.0001141	0.0082269	9.88e-05	0.412718	0.0038595	3.8476	0.0048517		044_VU107-A2_2	80	044_VU107-A2_2	IR119	groundmass	Klaudia Kuiper	28.201	0.08	0.0047753	0.1	0.985339	0.1	1	1e-13
	045_VU107-A2_2	16		0.0108984	2.16067	1.70277	2.24066	0.440264	0.291599	36.7961	0.180882	169.631	0.0528234	4.52452	0.0175024	39.1498	0.149837	98.1423	6.47306	9.29178	0.417749		045_VU107-A2_2	16	0.0099279	0.0001391	0.0113157	0.0001141	0.0082269	9.88e-05	0.412718	0.0038595	3.8476	0.0048517		045_VU107-A2_2	16	045_VU107-A2_2	IR119	groundmass	Klaudia Kuiper	28.201	0.08	0.0047753	0.1	0.985339	0.1	1	1e-13
			S	0.226495	0.481007	25.1655	0.630974	6.78323	0.0917273	568.449	0.0604138	2676.5	0.0237634
	Information on Analysis and Constants Used in Calculations									Results		40(a)/36(a)	± 2s	40(r)/39(k)	± 2s	Age	± 2s	MSWD	39Ar(k)	K/Ca	± 2s
																(Ma)			(%,n)
	Sample = 032_VU107-A2_2				Age Equations = Min et al. (2000)					Age Plateau				4.5607	0.0105318	39.4595	0.119256	1.61535	56.5468	12.912	2.35068
	Material = IR119				Negative Intensities = Allowed										0.00230925		0.00302224	0.138232	7
	Location = groundmass				Decay Constant 40K = 5.460 ± 0.053 E-10 1/a					Full External Error							0.828209	2.1547	2σ Confidence Limit
	Analyst = Klaudia Kuiper				Decay Constant 39Ar = 2.940 ± 0.016 E-07 1/h					Analytical Error							0.0901466	1.27096	Error Magnification
	Project = VU107				Decay Constant 37Ar = 8.230 ± 0.012 E-04 1/h
	Mass Discrimination Law = LIN				Decay Constant 36Cl = 2.257 ± 0.015 E-06 1/a					Total Fusion Age				4.59223	0.0060935	39.7294	0.094329		11	9.71275	0.12313
	Irradiation = VU107				Decay Activity 40K(EC,β⁺) = 3.310 ± 0.030 1/gs										0.00132691		0.00237428
	J = 0.00477530 ± 0.00000478				Decay Activity 40K(β⁻) = 27.890 ± 0.150 1/gs					Full External Error							0.830511
	FCs = 28.201 ± 0.023 Ma				Atmospheric Ratio 40/36(a) = 298.56 ± 0.31					Analytical Error							0.0521495
	IGSN = Undefined				Atmospheric Ratio 38/36(a) = 0.1885 ± 0.0003
	Preferred Age = Undefined				Production Ratio 39/37(ca) = 0.000673 ± 0.000004					Normal Isochron		286.788	105.844	4.56357	0.0175659	39.4841	0.169438	2.00329	56.5468
	Classification = Undefined				Production Ratio 36/37(ca) = 0.000264 ± 0.000002								0.369067		0.00384916		0.00429129	0.0747711	7
	Experiment Type = Undefined				Production Ratio 40/39(k) = 0.000860 ± 0.000070					Full External Error							0.837405	2.26491	2σ Confidence Limit
	Extraction Method = Undefined				Production Ratio 38/39(k) = 0.012110 ± 0.000030					Analytical Error							0.150353	1.41537	Error Magnification
	Heating = 720 sec				Production Ratio 36/38(cl) = 262.80 ± 1.71												1		Number of Iterations
	Isolation = 18.00 min				Scaling Ratio K/Ca = 0.430												7.23623e-06		Convergence
	Instrument = HELIX				Abundance Ratio 40K/K = 1.1700 ± 0.0100 E-04
	Lithology = Undefined				Atomic Weight K = 39.0983 ± 0.0001 g					Inverse Isochron Clustered Points		302.601	97.283	4.56031	0.0172816	39.4562	0.167258	1.93468	56.5468
	Lat-Lon = Undefined - Undefined												0.32149		0.00378956		0.0042391	0.0850362	7
	Feature = Undefined									Full External Error							0.836403	2.26491	2σ Confidence Limit
										Analytical Error							0.147922	1.39093	Error Magnification
																	3		Number of Iterations
																	1.54246e-05		Convergence
																	0.0275238		Spreading Factor
[truncated: 39 more columns]

## Sheet: Hidden Data
Double Line Plot Age Plateau			Double Line Plot K/Ca Plateau			X-Y Plot Normal Isochron		X-Y Plot Inverse Isochron		Error Ellipses Normal Isochron		Error Ellipses Inverse Isochron
Ar39k%	Line 1	Line 2	Ar39k%	Line 1	Line 2	X-axis	Y-axis	X-axis	Y-axis	X-axis	Y-axis	X-axis	Y-axis
0	39.2399	39.6918	0	10.3822	11.2678	2191.7	10295.9	0.212872	9.71265e-05	2258.05	10609	0.214082	9.72222e-05
6.65168	39.2399	39.6918	6.65168	10.3822	11.2678	7783.5	35912.6	0.216735	2.78454e-05	2258.87	10597.7	0.214041	9.64547e-05
6.65168	39.853	39.3208	6.65168	15.421	13.7431	10674.1	49192.9	0.216985	2.03281e-05	2255.12	10565.8	0.21392	9.57331e-05
13.4085	39.853	39.3208	13.4085	15.421	13.7431	14239.6	65376.4	0.21781	1.5296e-05	2247.04	10515.5	0.213728	9.51064e-05
13.4085	39.428	39.8322	13.4085	16.5689	19.5052	12920.4	59284.5	0.217939	1.68678e-05	2235.2	10450.2	0.213477	9.46173e-05
21.3278	39.428	39.8322	21.3278	16.5689	19.5052	12068.1	55255.2	0.218406	1.80978e-05	2220.38	10374.5	0.213185	9.42993e-05
21.3278	39.7373	39.3443	21.3278	25.907	21.1465	10700.3	48880.6	0.218907	2.0458e-05	2203.62	10293.3	0.212872	9.41739e-05
28.8471	39.7373	39.3443	28.8471	25.907	21.1465	6905.86	31617.7	0.218417	3.16278e-05	2186.04	10212.4	0.212558	9.42497e-05
28.8471	39.3061	39.6923	28.8471	21.0151	26.3687	2083.06	9882.28	0.210787	0.000101191	2168.84	10137.1	0.212266	9.45216e-05
36.9349	39.3061	39.6923	36.9349	21.0151	26.3687	499.781	2724.27	0.183455	0.00036707	2153.2	10072.6	0.212016	9.4971e-05
36.9349	39.5395	39.263	36.9349	18.1089	16.3241	3521.43	16231.3	0.216953	6.16093e-05	2140.19	10023.4	0.211823	9.55673e-05
47.2334	39.5395	39.263	47.2334	18.1089	16.3241					2130.69	9992.73	0.211702	9.62698e-05
47.2334	39.1166	39.4522	47.2334	11.5585	12.6244					2125.34	9982.71	0.211661	9.70308e-05
56.5468	39.1166	39.4522	56.5468	11.5585	12.6244					2124.52	9994.04	0.211702	9.77982e-05
56.5468	39.378	39.1038	56.5468	9.32063	8.83489					2128.27	10025.9	0.211823	9.85199e-05
69.4938	39.378	39.1038	69.4938	9.32063	8.83489					2136.35	10076.2	0.212016	9.91466e-05
69.4938	39.6698	39.9356	69.4938	7.14124	7.58339					2148.19	10141.5	0.212266	9.96356e-05
83.0696	39.6698	39.9356	83.0696	7.14124	7.58339					2163.01	10217.2	0.212558	9.99537e-05
83.0696	42.1205	41.8085	83.0696	3.8466	3.66958					2179.77	10298.4	0.212872	0.000100079
93.5269	42.1205	41.8085	93.5269	3.8466	3.66958					2197.35	10379.3	0.213185	0.000100003
93.5269	39	39.2996	93.5269	8.87404	9.70953					2214.55	10454.6	0.213477	9.97313e-05
100	39	39.2996	100	8.87404	9.70953					2230.19	10519.1	0.213728	9.92819e-05
										2243.2	10568.3	0.21392	9.86856e-05
										2252.7	10599	0.214041	9.79831e-05
										2258.05	10609	0.214082	9.72222e-05
										8514.12	39286	0.218195	2.7879e-05
										8502.19	39168.2	0.218145	2.72009e-05
										8441.29	38828.6	0.217999	2.65668e-05
										8335.55	38290.3	0.217767	2.60198e-05
										8192.2	37589.9	0.217465	2.55972e-05
										8020.99	36775.2	0.217113	2.53278e-05
										7833.6	35901.7	0.216735	2.523e-05
										7642.79	35029	0.216357	2.53104e-05
										7461.57	34216.5	0.216004	2.55636e-05
										7302.29	33519.6	0.215702	2.59723e-05
										7175.81	32985.7	0.21547	2.65086e-05
										7090.74	32651.3	0.215324	2.7136e-05
										7052.88	32539.2	0.215274	2.78118e-05
										7064.81	32657	0.215324	2.84898e-05
										7125.71	32996.6	0.21547	2.9124e-05
										7231.45	33534.9	0.215702	2.9671e-05
										7374.8	34235.3	0.216004	3.00936e-05
										7546.01	35050	0.216357	3.0363e-05
										7733.4	35923.4	0.216735	3.04608e-05
										7924.21	36796.2	0.217113	3.03804e-05
										8105.43	37608.7	0.217465	3.01272e-05
										8264.71	38305.6	0.217767	2.97185e-05
										8391.19	38839.5	0.217999	2.91822e-05
										8476.26	39173.8	0.218145	2.85548e-05
										8514.12	39286	0.218195	2.7879e-05
										11802.1	54391.8	0.218095	2.03374e-05
										11777.2	54211.8	0.218057	1.97811e-05
										11677.1	53689.7	0.217946	1.9262e-05
										11508.6	52861.1	0.21777	1.88156e-05
										11283.3	51782.6	0.21754	1.84722e-05
										11016.4	50527.6	0.217273	1.82554e-05
										10726.3	49181.6	0.216985	1.81798e-05
										10432.5	47836.4	0.216698	1.82506e-05
										10155.3	46583.6	0.216431	1.8463e-05
										9913.39	45508.7	0.216201	1.88025e-05
										9723.34	44684.8	0.216025	1.92459e-05
										9598.09	44168.2	0.215914	1.97631e-05
										9546.17	43994	0.215876	2.03189e-05
										9571.11	44174	0.215914	2.08752e-05
										9671.23	44696.1	0.216025	2.13943e-05
										9839.7	45524.7	0.216201	2.18407e-05
										10065	46603.2	0.216431	2.2184e-05
										10331.9	47858.2	0.216698	2.24009e-05
										10622	49204.2	0.216985	2.24765e-05
										10915.8	50549.4	0.217273	2.24057e-05
										11193	51802.2	0.21754	2.21933e-05
										11434.9	52877.1	0.21777	2.18538e-05
										11624.9	53701	0.217946	2.14104e-05
										11750.2	54217.6	0.218057	2.08931e-05
										11802.1	54391.8	0.218095	2.03374e-05
										16010.5	73509	0.218896	1.53128e-05
										15967.7	73228	0.218859	1.48198e-05
										15807.1	72412	0.21875	1.43592e-05
										15539.7	71116.5	0.218577	1.39625e-05
										15183.7	69429.9	0.218353	1.36566e-05
										14763.4	67467	0.218091	1.34625e-05
										14307.4	65361.6	0.21781	1.33933e-05
										13846.7	63257.3	0.217529	1.34538e-05
										13412.9	61297.3	0.217267	1.36399e-05
										13035.3	59615.3	0.217042	1.39388e-05
										12739.9	58326	0.216869	1.43302e-05
										12546.6	57517.1	0.216761	1.47874e-05
										12468.7	57243.8	0.216724	1.52793e-05
										12511.5	57524.7	0.216761	1.57723e-05
										12672.1	58340.7	0.216869	1.62329e-05
										12939.5	59636.2	0.217042	1.66296e-05
										13295.5	61322.9	0.217267	1.69355e-05
										13715.8	63285.8	0.217529	1.71296e-05
										14171.8	65391.1	0.21781	1.71987e-05
										14632.5	67495.5	0.218091	1.71383e-05
										15066.3	69455.4	0.218353	1.69522e-05
										15443.9	71137.4	0.218577	1.66533e-05
										15739.3	72426.8	0.21875	1.62619e-05
										15932.6	73235.7	0.218859	1.58047e-05
										16010.5	73509	0.218896	1.53128e-05
										14465.4	66374.9	0.219007	1.68803e-05
										14428.4	66129.9	0.21897	1.63577e-05
										14288.6	65418.4	0.218864	1.58699e-05
										14055.6	64288.9	0.218694	1.54501e-05
										13745.2	62818.3	0.218473	1.5127e-05
										13378.7	61106.9	0.218215	1.49224e-05
										12980.8	59271.3	0.217939	1.48505e-05
										12578.9	57436.7	0.217662	1.4916e-05
										12200.2	55727.9	0.217405	1.51145e-05
										11870.6	54261.5	0.217184	1.54325e-05
										11612.6	53137.4	0.217014	1.58483e-05
										11443.7	52432.3	0.216907	1.63336e-05
										11375.4	52194.1	0.216871	1.68554e-05
										11412.4	52439.1	0.216907	1.73779e-05
										11552.2	53150.6	0.217014	1.78657e-05
										11785.2	54280.1	0.217184	1.82855e-05
										12095.6	55750.7	0.217405	1.86087e-05
										12462.1	57462.1	0.217662	1.88132e-05
										12860	59297.7	0.217939	1.88852e-05
										13261.9	61132.4	0.218215	1.88197e-05
										13640.6	62841.1	0.218473	1.86211e-05
										13970.1	64307.5	0.218694	1.83031e-05
										14228.2	65431.6	0.218864	1.78873e-05
										14397.1	66136.8	0.21897	1.7402e-05
										14465.4	66374.9	0.219007	1.68803e-05
										13279.2	60801	0.219171	1.81067e-05
										13248.3	60609.7	0.219145	1.76362e-05
										13137.1	60053.6	0.219068	1.71973e-05
										12953	59170.4	0.218947	1.68197e-05
										12708.5	58020.5	0.218788	1.65292e-05
										12420.5	56682.1	0.218604	1.63456e-05
										12108.4	55246.4	0.218406	1.62814e-05
										11793.6	53811.4	0.218208	1.63411e-05
										11497.4	52474.7	0.218024	1.65204e-05
										11240.2	51327.5	0.217865	1.68072e-05
										11039.4	50448	0.217744	1.7182e-05
										10908.7	49896.1	0.217667	1.76192e-05
										10857	49709.5	0.217641	1.8089e-05
										10887.8	49900.7	0.217667	1.85594e-05
										10999.1	50456.9	0.217744	1.89984e-05
										11183.2	51340	0.217865	1.9376e-05
										11427.6	52490	0.218024	1.96665e-05
										11715.7	53828.4	0.218208	1.98501e-05
										12027.7	55264	0.218406	1.99142e-05
										12342.6	56699.1	0.218604	1.98546e-05
										12638.7	58035.7	0.218788	1.96753e-05
										12895.9	59182.9	0.218947	1.93885e-05
										13096.7	60062.4	0.219068	1.90137e-05
										13227.5	60614.3	0.219145	1.85765e-05
										13279.2	60801	0.219171	1.81067e-05
										11906.4	54390.5	0.21984	2.04656e-05
										11876.6	54200.3	0.219808	1.98685e-05
										11766.6	53647.6	0.219715	1.93116e-05
										11583.9	52770	0.219567	1.88328e-05
										11341	51627.3	0.219373	1.84647e-05
										11054.5	50297.5	0.219149	1.82325e-05
										10743.8	48871.1	0.218907	1.8152e-05
										10430.2	47445.4	0.218666	1.82286e-05
										10135	46117.5	0.218441	1.84571e-05
										9878.25	44977.8	0.218248	1.8822e-05
										9677.58	44104.2	0.2181	1.92984e-05
										9546.6	43556.1	0.218007	1.98538e-05
										9494.25	43370.8	0.217975	2.04503e-05
										9524.09	43561	0.218007	2.10475e-05
										9634.09	44113.7	0.2181	2.16044e-05
										9816.75	44991.3	0.218248	2.20832e-05
										10059.6	46133.9	0.218441	2.24513e-05
										10346.2	47463.8	0.218666	2.26835e-05
										10656.8	48890.1	0.218907	2.2764e-05
										10970.5	50315.9	0.219149	2.26874e-05
										11265.7	51643.8	0.219373	2.24589e-05
										11522.4	52783.4	0.219567	2.2094e-05
										11723.1	53657.1	0.219715	2.16176e-05
										11854.1	54205.2	0.219808	2.10622e-05
										11906.4	54390.5	0.21984	2.04657e-05
										7268.31	33277.9	0.21918	3.16433e-05
										7261.92	33220	0.219154	3.1213e-05
										7231.26	33052.9	0.219078	3.08109e-05
										7178.42	32788.1	0.218957	3.04645e-05
										7107.01	32443.4	0.218799	3.01974e-05
										7021.9	32042.5	0.218615	3.00278e-05
										6928.87	31612.7	0.218417	2.99672e-05
										6834.28	31183.2	0.21822	3.00198e-05
										6744.56	30783.3	0.218036	3.0182e-05
										6665.84	30440.3	0.217878	3.04427e-05
										6603.47	30177.5	0.217757	3.07841e-05
										6561.71	30012.8	0.217681	3.11831e-05
										6543.4	29957.6	0.217655	3.16124e-05
										6549.8	30015.4	0.217681	3.20427e-05
										6580.45	30182.5	0.217757	3.24448e-05
										6633.29	30447.4	0.217878	3.27912e-05
										6704.7	30792	0.218036	3.30583e-05
										6789.82	31192.9	0.21822	3.32279e-05
										6882.84	31622.7	0.218417	3.32885e-05
										6977.44	32052.2	0.218615	3.32359e-05
										7067.15	32452.1	0.218799	3.30737e-05
										7145.88	32795.2	0.218957	3.2813e-05
										7208.25	33058	0.219078	3.24715e-05
										7250	33222.6	0.219154	3.20726e-05
										7268.31	33277.9	0.21918	3.16433e-05
										2130.79	10109.1	0.21148	0.000101228
										2130.86	10101	0.211456	0.000100626
										2127.67	10078	0.211387	0.000100062
										2121.44	10041.7	0.211277	9.95755e-05
										2112.6	9994.47	0.211133	9.91989e-05
										2101.74	9939.64	0.210966	9.89581e-05
										2089.61	9880.9	0.210787	9.88694e-05
										2077.03	9822.25	0.210608	9.89389e-05
										2064.87	9767.7	0.210441	9.9162e-05
										2053.94	9720.95	0.210297	9.95233e-05
										2045	9685.2	0.210187	9.99983e-05
										2038.65	9662.87	0.210118	0.000100555
										2035.32	9655.5	0.210094	0.000101154
										2035.25	9663.59	0.210118	0.000101757
										2038.44	9686.58	0.210187	0.00010232
										2044.67	9722.9	0.210297	0.000102807
										2053.51	9770.09	0.210441	0.000103184
										2064.37	9824.92	0.210608	0.000103424
										2076.5	9883.66	0.210787	0.000103513
										2089.08	9942.31	0.210966	0.000103444
										2101.25	9996.86	0.211133	0.00010322
										2112.18	10043.6	0.211277	0.000102859
										2121.12	10079.4	0.211387	0.000102384
										2127.47	10101.7	0.211456	0.000101828
										2130.79	10109.1	0.21148	0.000101228
										505.633	2756.33	0.184083	0.000367185
										505.862	2755.16	0.184061	0.000366064
										505.676	2751.89	0.183998	0.000365011
										505.089	2746.73	0.183899	0.000364098
										504.14	2740.04	0.183769	0.000363388
										502.894	2732.28	0.183617	0.000362929
										501.435	2723.97	0.183455	0.000362752
										499.864	2715.68	0.183292	0.000362869
										498.288	2707.98	0.183141	0.000363273
										496.813	2701.39	0.183011	0.000363936
										495.54	2696.36	0.182911	0.000364812
										494.556	2693.23	0.182848	0.000365842
										493.929	2692.21	0.182827	0.000366955
										493.7	2693.38	0.182848	0.000368077
										493.885	2696.66	0.182911	0.00036913
										494.473	2701.82	0.183011	0.000370043
										495.422	2708.5	0.183141	0.000370753
										496.668	2716.27	0.183292	0.000371212
										498.126	2724.57	0.183455	0.000371389
										499.697	2732.86	0.183617	0.000371272
										501.274	2740.56	0.183769	0.000370868
										502.749	2747.16	0.183899	0.000370205
										504.022	2752.19	0.183998	0.000369329
										505.005	2755.32	0.184061	0.000368299
										505.633	2756.33	0.184083	0.000367185
										3680.31	16963.8	0.21777	6.16276e-05
										3678.18	16938.2	0.217742	6.09073e-05
										3665.36	16864.3	0.217661	6.02349e-05
										3642.74	16747.3	0.217531	5.96562e-05
										3611.85	16595.2	0.217361	5.92106e-05
										3574.79	16418.2	0.217164	5.89284e-05
										3534.1	16228.6	0.216953	5.8829e-05
										3492.55	16039.1	0.216741	5.8919e-05
										3452.96	15862.7	0.216544	5.91923e-05
										3418.04	15711.4	0.216374	5.96304e-05
										3390.17	15595.6	0.216244	6.02033e-05
										3371.24	15523.1	0.216163	6.0872e-05
										3362.55	15498.8	0.216135	6.1591e-05
										3364.68	15524.5	0.216163	6.23113e-05
										3377.49	15598.3	0.216244	6.29836e-05
										3400.12	15715.3	0.216374	6.35624e-05
										3431.01	15867.4	0.216544	6.4008e-05
										3468.06	16044.4	0.216741	6.42902e-05
										3508.75	16234.1	0.216953	6.43896e-05
										3550.3	16423.6	0.217164	6.42996e-05
										3589.89	16600	0.217361	6.40263e-05
										3624.81	16751.2	0.217531	6.35882e-05
										3652.68	16867.1	0.217661	6.30153e-05
										3671.61	16939.6	0.217742	6.23465e-05
										3680.31	16963.8	0.21777	6.16276e-05
