# Supplementary material for: Exploring a link between the Middle Eocene Climatic Optimum and Neotethys continental arc flare-up
Source: Copernicus journal article supplement (doi:10.5194/cp-17-229-2021), 2021-01-18
Supplement: Supplementary file 19 [file S28_VU107-A4_1.xls]

## Sheet: Summary Table
	Relative Abundances			36Ar [fA]	%1s	37Ar [fA]	%1s	38Ar [fA]	%1s	39Ar [fA]	%1s	40Ar [fA]	%1s	40(r)/39(k)	± 2s	Age	± 2s	40Ar(r)	39Ar(k)	K/Ca	± 2s		Procedure Blanks		36Ar [fA]	1s	37Ar [fA]	1s	38Ar [fA]	1s	39Ar [fA]	1s	40Ar [fA]	1s		Sample Parameters		Sample	Material	Location	Analyst	Standard	%1s	J	%1s	MDF	%1s	Volume Ratio	Sensitivity
																(Ma)		(%)	(%)																							(in Ma)							(mol/volt)
	007_VU107-A4	9	4	0.00444517	3.99998	1.75369	2.19024	0.0145329	1.44607	1.16594	1.04351	6.43282	0.171814	4.50127	0.132461	38.9507	1.13411	81.5023	62.0199	0.285595	0.0138604		007_VU107-A4	9	0.0050272	9.44e-05	0.011228	0.0001559	0.0043615	8.05e-05	0.217696	0.0084132	1.55411	0.003183		007_VU107-A4	9	007_VU107-A4	sanidine	IR215	Klaudia Kuiper	28.201	0.08	0.0047753	0.1	0.982201	0.1	1	1e-13
	008_VU107-A4	9	4	0.00199215	7.33431	1.1373	3.05587	0.00914602	1.58241	0.714048	1.43088	3.81101	0.225153	4.63391	0.182283	40.0861	1.55972	86.7299	37.9801	0.269684	0.0182033		008_VU107-A4	9	0.0050272	9.44e-05	0.011228	0.0001559	0.0043615	8.05e-05	0.217696	0.0084132	1.55411	0.003183		008_VU107-A4	9	008_VU107-A4	sanidine	IR215	Klaudia Kuiper	28.201	0.08	0.0047753	0.1	0.982201	0.1	1	1e-13
			S	0.00643732	3.57505	2.89099	1.79176	0.0236789	1.07763	1.87999	0.845093	10.2438	0.136592
	Information on Analysis and Constants Used in Calculations									Results		40(a)/36(a)	± 2s	40(r)/39(k)	± 2s	Age	± 2s	MSWD	39Ar(k)	K/Ca	± 2s
																(Ma)			(%,n)
	Sample = 007_VU107-A4				Age Equations = Min et al. (2000)					Age Plateau				4.54711	0.12616	39.3432	1.08273	1.38613	100	0.279756	0.0153385
	Material = sanidine				Negative Intensities = Allowed										0.0277451		0.0275202	0.239059	2
	Location = IR215				Decay Constant 40K = 5.460 ± 0.053 E-10 1/a					Full External Error							1.3565	3.82843	2σ Confidence Limit
	Analyst = Klaudia Kuiper				Decay Constant 39Ar = 2.940 ± 0.016 E-07 1/h					Analytical Error							1.07993	1.17734	Error Magnification
	Project = VU107				Decay Constant 37Ar = 8.230 ± 0.012 E-04 1/h
	Mass Discrimination Law = LIN				Decay Constant 36Cl = 2.257 ± 0.015 E-06 1/a					Total Fusion Age				4.55165	0.107374	39.382	0.922398		2	0.279336	0.0110697
	Irradiation = VU107				Decay Activity 40K(EC,β⁺) = 3.310 ± 0.030 1/gs										0.0235901		0.0234218
	J = 0.00477530 ± 0.00000478				Decay Activity 40K(β⁻) = 27.890 ± 0.150 1/gs					Full External Error							1.23285
	FCs = 28.201 ± 0.023 Ma				Atmospheric Ratio 40/36(a) = 298.56 ± 0.31					Analytical Error							0.919101
	IGSN = Undefined				Atmospheric Ratio 38/36(a) = 0.1885 ± 0.0003
	Preferred Age = Undefined				Production Ratio 39/37(ca) = 0.000673 ± 0.000004					Normal Isochron Cannot Calculate
	Classification = Undefined				Production Ratio 36/37(ca) = 0.000264 ± 0.000002
	Experiment Type = Undefined				Production Ratio 40/39(k) = 0.000860 ± 0.000070
	Extraction Method = Undefined				Production Ratio 38/39(k) = 0.012110 ± 0.000030
	Heating = 720 sec				Production Ratio 36/38(cl) = 262.80 ± 1.71
	Isolation = 18.00 min				Scaling Ratio K/Ca = 0.430
	Instrument = HELIX				Abundance Ratio 40K/K = 1.1700 ± 0.0100 E-04
	Lithology = Undefined				Atomic Weight K = 39.0983 ± 0.0001 g					Inverse Isochron Cannot Calculate
	Lat-Lon = Undefined - Undefined
	Feature = Undefined
[truncated: 39 more columns]

## Sheet: Hidden Data
Double Line Plot Age Plateau			Double Line Plot K/Ca Plateau			X-Y Plot Normal Isochron		X-Y Plot Inverse Isochron		Error Ellipses Normal Isochron		Error Ellipses Inverse Isochron
Ar39k%	Line 1	Line 2	Ar39k%	Line 1	Line 2	X-axis	Y-axis	X-axis	Y-axis	X-axis	Y-axis	X-axis	Y-axis
0	37.8166	40.0849	0	0.271735	0.299456	292.492	1615.14	0.181093	0.00061914			0.184927	0.000619485
62.0199	37.8166	40.0849	62.0199	0.271735	0.299456	421.605	2252.24	0.187194	0.000444002			0.184797	0.000605128
62.0199	41.6458	38.5264	62.0199	0.287887	0.25148							0.184414	0.000591726
100	41.6458	38.5264	100	0.287887	0.25148							0.183805	0.000580192
												0.18301	0.000571312
												0.182086	0.000565691
												0.181093	0.000563713
												0.180101	0.000565512
												0.179176	0.000570966
												0.178382	0.000579703
												0.177773	0.000591127
												0.17739	0.000604461
												0.177259	0.000618794
												0.17739	0.000633152
												0.177773	0.000646554
												0.178382	0.000658088
												0.179176	0.000666968
												0.180101	0.000672589
												0.181093	0.000674567
												0.182086	0.000672768
												0.18301	0.000667314
												0.183805	0.000658577
												0.184414	0.000647153
												0.184797	0.000633819
												0.184927	0.000619485
												0.192622	0.000444313
												0.192437	0.000424406
												0.191895	0.000405835
												0.191032	0.000389864
												0.189908	0.000377583
												0.188599	0.000369829
												0.187194	0.000367129
												0.185789	0.000369668
												0.184479	0.000377273
												0.183355	0.000389425
												0.182492	0.000405297
												0.18195	0.000423806
												0.181765	0.000443692
												0.18195	0.000463599
												0.182492	0.00048217
												0.183355	0.00049814
												0.184479	0.000510421
												0.185789	0.000518176
												0.187194	0.000520876
												0.188599	0.000518337
												0.189908	0.000510732
												0.191032	0.00049858
												0.191895	0.000482708
												0.192437	0.000464199
												0.192622	0.000444313
