# Supplementary material for: Exploring a link between the Middle Eocene Climatic Optimum and Neotethys continental arc flare-up
Source: Copernicus journal article supplement (doi:10.5194/cp-17-229-2021), 2021-01-18
Supplement: Supplementary file 20 [file S29_VU107-A5_1.xls]

## Sheet: Summary Table
	Relative Abundances			36Ar [fA]	%1s	37Ar [fA]	%1s	38Ar [fA]	%1s	39Ar [fA]	%1s	40Ar [fA]	%1s	40(r)/39(k)	± 2s	Age	± 2s	40Ar(r)	39Ar(k)	K/Ca	± 2s		Procedure Blanks		36Ar [fA]	1s	37Ar [fA]	1s	38Ar [fA]	1s	39Ar [fA]	1s	40Ar [fA]	1s		Sample Parameters		Sample	Material	Location	Analyst	Standard	%1s	J	%1s	MDF	%1s	Volume Ratio	Sensitivity
																(Ma)		(%)	(%)																							(in Ma)							(mol/volt)
	098_VU107-A5	10	4	0.00338892	5.84222	0.430411	4.8889	0.00147629	8.9819	0.0879291	0.694049	1.33022	0.561519	4.01961	1.36158	34.8222	11.684	26.4825	0.246277	0.0875557	0.00864748		098_VU107-A5	10	0.0081208	7.55e-05	0.0126404	9.23e-05	0.0056104	0.0001001	0.0105086	0.0002218	2.40385	0.0043855		098_VU107-A5	10	098_VU107-A5	plagioclase	IR216	Klaudia Kuiper	28.201	0.08	0.0047753	0.1	0.986385	0.1	1	1e-13
	099_VU107-A5	20	4	0.0471068	0.873637	26.8328	0.808247	0.0826378	0.562801	6.27759	0.150324	40.9501	0.0560688	4.63221	0.0430641	40.0715	0.368483	70.8068	17.59	0.10031	0.00164948		099_VU107-A5	20	0.0081208	7.55e-05	0.0126404	9.23e-05	0.0056104	0.0001001	0.0105086	0.0002218	2.40385	0.0043855		099_VU107-A5	20	099_VU107-A5	plagioclase	IR216	Klaudia Kuiper	28.201	0.08	0.0047753	0.1	0.986385	0.1	1	1e-13
	100_VU107-A5	30	4	0.0146003	2.03953	37.2641	0.755681	0.107832	0.501405	8.89771	0.111086	42.9365	0.0396366	4.67809	0.0238356	40.464	0.203908	96.6706	24.9331	0.102384	0.00156412		100_VU107-A5	30	0.0081208	7.55e-05	0.0126404	9.23e-05	0.0056104	0.0001001	0.0105086	0.0002218	2.40385	0.0043855		100_VU107-A5	30	100_VU107-A5	plagioclase	IR216	Klaudia Kuiper	28.201	0.08	0.0047753	0.1	0.986385	0.1	1	1e-13
	102_VU107-A5	45	4	0.0171261	1.78797	46.6442	0.778088	0.127189	0.554892	10.551	0.113354	50.6358	0.042463	4.67603	0.0219461	40.4465	0.187746	97.1449	29.5613	0.0969773	0.00152517		102_VU107-A5	45	0.0081626	0.000119	0.0127965	0.000159	0.0057353	0.0001195	0.0105908	0.000134	2.4246	0.0033276		102_VU107-A5	45	102_VU107-A5	plagioclase	IR216	Klaudia Kuiper	28.201	0.08	0.0047753	0.1	0.986385	0.1	1	1e-13
	103_VU107-A5	70	4	0.0079243	2.72534	21.6495	0.798541	0.0576592	0.859024	4.79141	0.119414	22.9543	0.0483108	4.66642	0.0304787	40.3642	0.260753	97.1091	13.4235	0.0948772	0.00153223		103_VU107-A5	70	0.0081626	0.000119	0.0127965	0.000159	0.0057353	0.0001195	0.0105908	0.000134	2.4246	0.0033276		103_VU107-A5	70	103_VU107-A5	plagioclase	IR216	Klaudia Kuiper	28.201	0.08	0.0047753	0.1	0.986385	0.1	1	1e-13
	104_VU107-A5	16	4	0.00853925	2.71273	22.8843	0.834775	0.0600493	0.699718	5.08486	0.140123	24.4183	0.0901915	4.66879	0.0323795	40.3845	0.277011	96.9281	14.2458	0.095256	0.00161274		104_VU107-A5	16	0.0081626	0.000119	0.0127965	0.000159	0.0057353	0.0001195	0.0105908	0.000134	2.4246	0.0033276		104_VU107-A5	16	104_VU107-A5	plagioclase	IR216	Klaudia Kuiper	28.201	0.08	0.0047753	0.1	0.986385	0.1	1	1e-13
			S	0.0986857	0.710266	155.705	0.366063	0.436843	0.275288	35.6905	0.0569864	183.225	0.024057
	Information on Analysis and Constants Used in Calculations									Results		40(a)/36(a)	± 2s	40(r)/39(k)	± 2s	Age	± 2s	MSWD	39Ar(k)	K/Ca	± 2s
																(Ma)			(%,n)
	Sample = 098_VU107-A5				Age Equations = Min et al. (2000)					Age Plateau				4.67016	0.0124937	40.3962	0.133452	0.963297	100	0.0978406	0.00271622
	Material = plagioclase				Negative Intensities = Allowed										0.00267522		0.00330359	0.438685	6
	Location = IR216				Decay Constant 40K = 5.460 ± 0.053 E-10 1/a					Full External Error							0.849416	2.26491	2σ Confidence Limit
	Analyst = Klaudia Kuiper				Decay Constant 39Ar = 2.940 ± 0.016 E-07 1/h					Analytical Error							0.106885	1	Error Magnification
	Project = VU107				Decay Constant 37Ar = 8.230 ± 0.012 E-04 1/h
	Mass Discrimination Law = LIN				Decay Constant 36Cl = 2.257 ± 0.015 E-06 1/a					Total Fusion Age				4.6649	0.0135664	40.3512	0.140862		6	0.0982745	0.000728214
	Irradiation = VU107				Decay Activity 40K(EC,β⁺) = 3.310 ± 0.030 1/gs										0.00290819		0.00349091
	J = 0.00477530 ± 0.00000478				Decay Activity 40K(β⁻) = 27.890 ± 0.150 1/gs					Full External Error							0.849698
	FCs = 28.201 ± 0.023 Ma				Atmospheric Ratio 40/36(a) = 298.56 ± 0.31					Analytical Error							0.116065
	IGSN = Undefined				Atmospheric Ratio 38/36(a) = 0.1885 ± 0.0003
	Preferred Age = Undefined				Production Ratio 39/37(ca) = 0.000673 ± 0.000004					Normal Isochron Overestimated Error		290.982	7.2754	4.67785	0.0141467	40.462	0.145093	0.236071	100
	Classification = Undefined				Production Ratio 36/37(ca) = 0.000264 ± 0.000002								0.0250029		0.00302418		0.00358592	0.918123	6
	Experiment Type = Undefined				Production Ratio 40/39(k) = 0.000860 ± 0.000070					Full External Error							0.852657	2.41421	2σ Confidence Limit
	Extraction Method = Undefined				Production Ratio 38/39(k) = 0.012110 ± 0.000030					Analytical Error							0.121022	1	Error Magnification
	Heating = 720 sec				Production Ratio 36/38(cl) = 262.80 ± 1.71												1		Number of Iterations
	Isolation = 18.00 min				Scaling Ratio K/Ca = 0.430												9.30194e-07		Convergence
	Instrument = HELIX				Abundance Ratio 40K/K = 1.1700 ± 0.0100 E-04
	Lithology = Undefined				Atomic Weight K = 39.0983 ± 0.0001 g					Inverse Isochron Overestimated Error		291.162	7.2857	4.67747	0.0142278	40.4587	0.14567	0.221856	100
	Lat-Lon = Undefined - Undefined												0.0250228		0.00304178		0.00360045	0.926358	6
	Feature = Undefined									Full External Error							0.852689	2.41421	2σ Confidence Limit
										Analytical Error							0.121717	1	Error Magnification
																	3		Number of Iterations
																	5.42502e-05		Convergence
																	0.665387		Spreading Factor
[truncated: 39 more columns]

## Sheet: Hidden Data
Double Line Plot Age Plateau			Double Line Plot K/Ca Plateau			X-Y Plot Normal Isochron		X-Y Plot Inverse Isochron		Error Ellipses Normal Isochron		Error Ellipses Inverse Isochron
Ar39k%	Line 1	Line 2	Ar39k%	Line 1	Line 2	X-axis	Y-axis	X-axis	Y-axis	X-axis	Y-axis	X-axis	Y-axis
0	23.1382	46.5062	0	0.0789082	0.0962032	26.7577	406.115	0.065887	0.00246235			0.0670659	0.0024809
0.246277	23.1382	46.5062	0.246277	0.0789082	0.0962032	156.399	1023.03	0.152878	0.000977488			0.067027	0.00240301
0.246277	40.44	39.703	0.246277	0.10196	0.0986606	1862.99	9013.79	0.206682	0.000110941			0.0669103	0.00232916
17.8363	40.44	39.703	17.8363	0.10196	0.0986606	2186.12	10520.9	0.207788	9.50487e-05			0.066724	0.00226438
17.8363	40.2601	40.6679	17.8363	0.100819	0.103948	2162.61	10390.2	0.208139	9.62445e-05			0.0664805	0.0022131
42.7694	40.2601	40.6679	42.7694	0.100819	0.103948	2029.57	9774.2	0.207646	0.00010231			0.0661966	0.00217881
42.7694	40.6342	40.2587	42.7694	0.0985025	0.0954521							0.0658917	0.00216384
72.3308	40.6342	40.2587	72.3308	0.0985025	0.0954521							0.0655864	0.00216921
72.3308	40.1034	40.625	72.3308	0.093345	0.0964094							0.0653015	0.00219456
85.7542	40.1034	40.625	85.7542	0.093345	0.0964094							0.0650566	0.00223816
85.7542	40.6615	40.1075	85.7542	0.0968688	0.0936433							0.0648683	0.00229703
100	40.6615	40.1075	100	0.0968688	0.0936433							0.0647494	0.00236718
												0.064708	0.00244381
												0.0647469	0.0025217
												0.0648636	0.00259555
												0.06505	0.00266032
												0.0652934	0.00271161
												0.0655773	0.0027459
												0.0658823	0.00276087
												0.0661876	0.0027555
												0.0664724	0.00273015
												0.0667173	0.00268655
												0.0669056	0.00262767
												0.0670246	0.00255753
												0.0670659	0.0024809
												0.15337	0.000977871
												0.153353	0.000972567
												0.153304	0.000967598
												0.153226	0.000963304
												0.153124	0.000959976
												0.153005	0.000957841
												0.152878	0.000957046
												0.15275	0.000957643
												0.152632	0.000959593
												0.15253	0.000962762
												0.152452	0.000966935
												0.152403	0.000971827
												0.152386	0.000977105
												0.152403	0.000982409
												0.152452	0.000987378
												0.15253	0.000991672
												0.152632	0.000995
												0.15275	0.000997135
												0.152878	0.00099793
												0.153005	0.000997333
												0.153124	0.000995383
												0.153225	0.000992214
												0.153304	0.000988041
												0.153353	0.000983149
												0.15337	0.000977871
												0.207171	0.000110971
												0.207154	0.000107192
												0.207106	0.000103668
												0.207028	0.00010064
												0.206927	9.83146e-05
												0.206809	9.68492e-05
												0.206682	9.63442e-05
												0.206556	9.68339e-05
												0.206438	9.8285e-05
												0.206336	0.000100599
												0.206259	0.000103617
												0.20621	0.000107135
												0.206193	0.000110912
												0.20621	0.00011469
												0.206259	0.000118214
												0.206336	0.000121242
												0.206438	0.000123568
												0.206556	0.000125033
												0.206682	0.000125538
												0.206809	0.000125048
												0.206927	0.000123597
												0.207028	0.000121284
												0.207106	0.000118265
												0.207154	0.000114748
												0.207171	0.000110971
												0.208292	9.5077e-05
												0.208275	9.16979e-05
												0.208225	8.85471e-05
												0.208144	8.58395e-05
												0.20804	8.37594e-05
												0.207918	8.24486e-05
												0.207788	8.19966e-05
												0.207657	8.2434e-05
												0.207535	8.37311e-05
												0.207431	8.57994e-05
												0.207351	8.84981e-05
												0.2073	9.16432e-05
												0.207283	9.50204e-05
												0.2073	9.83995e-05
												0.207351	0.00010155
												0.207431	0.000104258
												0.207535	0.000106338
												0.207657	0.000107649
												0.207788	0.000108101
												0.207918	0.000107663
												0.20804	0.000106366
												0.208144	0.000104298
												0.208225	0.000101599
												0.208275	9.84542e-05
												0.208292	9.5077e-05
												0.208677	9.62794e-05
												0.208659	9.12316e-05
												0.208605	8.65255e-05
												0.20852	8.24817e-05
												0.208408	7.93758e-05
												0.208279	7.74195e-05
												0.208139	7.67461e-05
												0.208	7.74015e-05
												0.20787	7.93409e-05
												0.207759	8.24324e-05
												0.207674	8.64651e-05
												0.20762	9.11643e-05
												0.207601	9.62096e-05
												0.20762	0.000101257
												0.207674	0.000105964
												0.207759	0.000110007
												0.20787	0.000113113
												0.208	0.00011507
												0.208139	0.000115743
												0.208279	0.000115088
												0.208408	0.000113148
												0.20852	0.000110057
												0.208605	0.000106024
												0.208659	0.000101325
												0.208677	9.62794e-05
												0.208339	0.00010241
												0.208316	9.73134e-05
												0.208247	9.25574e-05
												0.208136	8.8466e-05
												0.207993	8.53181e-05
												0.207825	8.33282e-05
												0.207646	8.26318e-05
												0.207466	8.32765e-05
												0.207299	8.52183e-05
												0.207155	8.83249e-05
												0.207045	9.23846e-05
												0.206976	9.71206e-05
												0.206952	0.00010221
												0.206976	0.000107307
												0.207045	0.000112063
												0.207155	0.000116154
												0.207299	0.000119302
												0.207466	0.000121292
												0.207646	0.000121988
												0.207825	0.000121344
												0.207993	0.000119402
												0.208136	0.000116295
												0.208247	0.000112236
												0.208316	0.0001075
												0.208339	0.00010241
