# Supplementary material for: Exploring a link between the Middle Eocene Climatic Optimum and Neotethys continental arc flare-up
Source: Copernicus journal article supplement (doi:10.5194/cp-17-229-2021), 2021-01-18
Supplement: Supplementary file 21 [file S2_Literature ages.xlsx]

## Sheet: literature ages
Study	Region	Name site	Name sample	Site lat	Site long	Formation age	error margin	Uncertainty	Recalibrated Ar-Ar age (Ma)	1σ error	method	additional	Standard	Age standard	Decay constant	Reactor + corrections	Laboratory	(emplacement age)	Intrusive/extrusive	Remarks	Geochemistry	Column2	Column3	Link to Ar methods
Aghazadeh et al. (2010)	NW Iran	Khankandi	KH-M6-18	38.443	47.4381	28.9	1.1	1σ			U-Pb	LA-ICP-MS							Intrusive	Monzonite	Shoshonite
Aghazadeh et al. (2011)	NW Iran	Shaivar Dagh	Sh-M3-121	38.6011	47.12	23.31	0.55	1σ			U-Pb	LA-ICP-MS							Intrusive	Monzodiorite	Shoshonite
Aghazadeh et al. (2011)	NW Iran	Shaivar Dagh	Sh-M3-72	38.6111	47.1053	25.12	0.97	1σ			U-Pb	LA-ICP-MS							Intrusive	Monzonite	Shoshonite
Aghazadeh et al. (2011)	NW Iran	Shaivar Dagh	Sh-M3-15	38.6525	46.9659	30.8	2.1	1σ			U-Pb	LA-ICP-MS							Intrusive	Granodiorite (GPS point Sh-M1-15)	High K calc-alk
Aghazadeh et al. 2015	NW Iran	Sungun	SPC	38.7075	46.7041	21.01	0.15	1σ			U-Pb	LA-ICP-MS							Intrusive
Aghazadeh et al. 2015	NW Iran	Sungun	SPM	38.7075	46.7041	21.13	0.23	1σ			U-Pb	LA-ICP-MS							Intrusive
Aghazadeh et al. 2015	NW Iran	Sungun	ED	38.7075	46.7041	19.85	0.36	1σ			U-Pb	LA-ICP-MS							Intrusive
Aghazadeh et al. 2015	NW Iran	Sungun	LD	38.7075	46.7041	19.28	0.33	1σ			U-Pb	LA-ICP-MS							Intrusive
Aghazadeh et al. 2015	UDMA	Sar Cheshmeh	SCP	29.9478	55.8687	12.97	0.24	1σ			U-Pb	LA-ICP-MS							Intrusive
Aghazadeh et al. 2015	UDMA	Sar Cheshmeh	LFP	29.9478	55.8687	12.36	0.7	1σ			U-Pb	LA-ICP-MS							Intrusive
Aghazadeh et al. 2015	UDMA	Sar Cheshmeh	HD	29.9478	55.8687	12.15	0.19	1σ			U-Pb	LA-ICP-MS							Intrusive
Aghazadeh et al. 2015	UDMA	Meiduk	Meiduk	30.4251	55.1652	11.58	0.21	1σ			U-Pb	LA-ICP-MS							Intrusive
Aghazadeh et al. 2015	UDMA	Darreh Zar	DZP	29.8813	55.9008	16.4	0.22	1σ			U-Pb	LA-ICP-MS							Intrusive
Aghazadeh et al. 2015	UDMA	Darreh Zar	DZDP	29.8813	55.9008	16.77	0.25	1σ			U-Pb	LA-ICP-MS							Intrusive
Aghazadeh et al. 2015	UDMA	Bondar-e Hanza	Bondar-e Hanza	29.3798	57.2112	27.35	0.71	1σ			U-Pb	LA-ICP-MS							Intrusive
Ahmadian et al. (2016)	Central Iran	Kal-e-Kafi	152M	33.4167	54.25	52	1	n.r.			U-Pb	SHRIMP							Intrusive	Quartz monzonite	Adakite
Ahmadian et al. (2016)	Central Iran	Kal-e-Kafi	101H	33.4167	54.25	50.3	1.1	n.r.			U-Pb	SHRIMP							Intrusive	Granite	Adakite
Alaminia et al. 2013	UDMA	Granite		35.8606	58.6381	55.4	2.3	2σ			U-Pb	LA-ICP-MS							Intrusive
Alaminia et al. 2013	UDMA	Hbl granitoid		35.8768	58.5937	92.8	1.3	2σ			U-Pb	LA-ICP-MS							Intrusive
Alaminia et al. 2013	UDMA	Arghash diorite		35.8811	58.5877	553.5	6.1	2σ			U-Pb	LA-ICP-MS							Intrusive
Alizadeh et al. 2017	Lut	Roshtkhar	S221	34.9949	59.9356	40	0.94	2σ			U-Pb	LA-ICP-MS							Intrusive	Syenite
Allen et al. 2011	NW Iran	Maku	Mu18.25	39.2663	44.6124	1.23	0.13	1σ	1.22152	0.129064	Ar-Ar		Sanidine Alder Creek Tuff	1.193 (Nomade et al. 2005)		Petten HFR			Extrusive
Allen et al. 2011	NW Iran	Maku	Mu17.24	39.2715	44.5788	0.37	0.06	1σ	0.367447	0.0595808	Ar-Ar		Sanidine Alder Creek Tuff	1.193 (Nomade et al. 2005)		Petten HFR			Extrusive
Allen et al. 2011	NW Iran	Maku	Mu3.9	39.2737	44.5595	0.4	0.05	1σ	0.39724	0.0496507	Ar-Ar		Sanidine Alder Creek Tuff	1.193 (Nomade et al. 2005)		Petten HFR			Extrusive
Allen et al. 2011	NW Iran	Maku	Mu11.16	39.3535	44.2479	0.509	0.01	1σ	0.505489	0.00993794	Ar-Ar		Sanidine Alder Creek Tuff	1.193 (Nomade et al. 2005)		Petten HFR			Extrusive
Allen et al. 2011	NW Iran	Maku	Mu14.9	38.1656	44.6398	1.872	0.009	1σ	1.8591	0.00905719	Ar-Ar		Sanidine Alder Creek Tuff	1.193 (Nomade et al. 2005)		Petten HFR			Extrusive
Ao et al. 2016	Zagros	13IRA31		34.2349	47.8326	79.3	0.9	1σ			U-Pb	LA-ICP-MS							Intrusive	rodingitised gabbro
Ao et al. 2016	Zagros	14ASJ08		34.3471	47.8733	37	0.7	1σ			U-Pb	LA-ICP-MS							Intrusive	foliated gabbro
Ao et al. 2016	Zagros	14ASJ09		34.3471	47.8733	35.7	0.5	1σ			U-Pb	LA-ICP-MS							Intrusive	plagiogranite
Ao et al. 2016	Zagros	13IRA35		34.8526	46.9438	39	1.7	1σ			U-Pb	LA-ICP-MS							Intrusive	rodingitised gabbro
Ao et al. 2016	Zagros	13IRA36		34.8526	46.9438	38	0.4	1σ			U-Pb	LA-ICP-MS							Intrusive	rodingitised gabbro
Ao et al. 2016	Zagros	13IRA43		34.876	46.9609	36.3	0.5	1σ			U-Pb	LA-ICP-MS							Intrusive	granitic dyke
Azizi et al. (2011) - CdE	SSZ	MBG7		35.0875	47.2695	143.5	2.3	2σ			U-Pb	LA-ICP-MS							Intrusive
Azizi et al. (2011) - CdE	SSZ	MBG10		35.0938	47.2476	147.5	1.3	2σ			U-Pb	LA-ICP-MS							Intrusive
Azizi et al. (2011) - CdE	SSZ	MBG1		35.1166	47.3229	147.5	1.3	2σ			U-Pb	LA-ICP-MS							Intrusive
Azizi et al. 2011 - JG	Zagros		H4	35.0453	46.8206	36.63	0.4	2σ			U-Pb	LA-ICP-MS							Intrusive
Azizi et al. 2011 - JG	Zagros		SG2	35.0453	46.8206	35.7	0.38	2σ			U-Pb	LA-ICP-MS							Intrusive
Azizi et al. 2011 - JG	Zagros		NZ3	35.0453	46.8206	35	3.6	2σ			U-Pb	LA-ICP-MS							Intrusive
Azizi et al. 2011 - JG	Zagros		NZ6	35.0453	46.8206	36.75	0.5	2σ			U-Pb	LA-ICP-MS							Intrusive
Azizi et al. 2011 - JG	Zagros		MG3	34.8565	46.9509	54.6	1.8	2σ			U-Pb	LA-ICP-MS							Intrusive
Azizi et al. 2018	Zagros	Baneh	BGR-5	35.9237	45.7933	39.7	0.9	1σ			U-Pb	LA-ICP-MS							Intrusive	Granite
Azizi et al. 2018	Zagros	Baneh	BGR-6	35.9237	45.7933	40.5	0.6	1σ			U-Pb	LA-ICP-MS							Intrusive	Granite
Azizi et al. 2018	Zagros	Baneh	BGR-7	35.9237	45.7933	41	1	1σ			U-Pb	LA-ICP-MS							Intrusive	Granite
Azizi et al. 2018	Zagros	Baneh	SAMD-2 Old grains	35.9585	45.7721	50.7	0.9	1σ			U-Pb	LA-ICP-MS							Intrusive	Appinite
Azizi et al. 2018	Zagros	Baneh	SAMD-4 Old grains	35.9621	45.7639	52.6	5.3	1σ			U-Pb	LA-ICP-MS							Intrusive	Appinite
Azizi et al. 2018	Zagros	Baneh	SAMD-2 Young grains	35.9585	45.7721	38.8	0.4	1σ			U-Pb	LA-ICP-MS							Intrusive	Appinite
Azizi et al. 2018	Zagros	Baneh	SAMD-4 Young grains	35.9621	45.7639	39.1	0.6	1σ			U-Pb	LA-ICP-MS							Intrusive	Appinite
Babazadeh et al. 2017	UDMA	Ardestan	HZ1	32.8523	52.4407	20.4	0.1	n.r.			Rb-Sr								Intrusive
Babazadeh et al. 2017	UDMA	Ardestan	HZ4	32.8679	52.4128	20.5	0.1	n.r.			Rb-Sr								Intrusive
Babazadeh et al. 2017	UDMA	Ardestan	FK1	32.8666	52.3653	22.3	0.1	n.r.			Rb-Sr								Intrusive
Babazadeh et al. 2017	UDMA	Ardestan	ZF72	33.1258	52.3548	24.5	0.1	n.r.			U-Pb	LA-ICP-MS							Intrusive
Babazadeh et al. 2017	UDMA	Ardestan	ZF35	33.1132	52.418	24.6	0.1	n.r.			U-Pb	LA-ICP-MS							Intrusive
Babazadeh et al. 2017	UDMA	Ardestan	MA11	33.1144	52.3712	24.6	0.1	n.r.			U-Pb	LA-ICP-MS							Intrusive
Ballato et al. 2016	NW Iran		MH 11-06	37.1716	47.502	15.6	1.4	2σ	15.998	0.357423	Ar-Ar		Fish Canyon Tuff	27.5 Ma; Uto et al., 1997; Ishizuka, 1998; Lanphere and Baasgaards, 2003		NRG Petten			Extrusive	Rhyolite
Ballato et al. 2016	NW Iran		MH 11-14	37.2752	47.7775	15	0.3	2σ	15.3828	0.0768366	Ar-Ar		Fish Canyon Tuff	27.5 Ma; Uto et al., 1997; Ishizuka, 1998; Lanphere and Baasgaards, 2005		NRG Petten			Extrusive	Tuff
Ballato et al. 2016	NW Iran		MH 11-13	37.306	47.8483	15.7	1.1	2σ	16.1006	0.280853	Ar-Ar		Fish Canyon Tuff	27.5 Ma; Uto et al., 1997; Ishizuka, 1998; Lanphere and Baasgaards, 2004		NRG Petten			Extrusive	Tuff
Ballato et al. 2016	NW Iran		MH 11-04	37.3119	47.5915	25	1.3	2σ	25.6372	0.331117	Ar-Ar		Fish Canyon Tuff	27.5 Ma; Uto et al., 1997; Ishizuka, 1998; Lanphere and Baasgaards, 2001		NRG Petten			Extrusive	Trachyandesite
Ballato et al. 2016	NW Iran		MH 11-05	37.3335	47.6768	19.2	0.6	2σ	19.6897	0.153202	Ar-Ar		Fish Canyon Tuff	27.5 Ma; Uto et al., 1997; Ishizuka, 1998; Lanphere and Baasgaards, 2002		NRG Petten			Extrusive	Andesitic basalt
Ballato et al. 2016	NW Iran		MH 11-07	37.0498	47.5139	16.9	1.8	2σ			U-Pb	n.r.							Extrusive
Ballato et al. 2016	NW Iran		S 11-M-01	37.1919	47.3501	16.1	0.5	2σ			U-Pb	n.r.							Extrusive
Ballato et al. 2016	NW Iran		MIA 12-27	37.2041	47.5601	10.7	0.2	2σ			U-Pb	n.r.							Extrusive
Ballato et al. 2016	NW Iran		MH 11-11	37.206	47.4059	10.7	0.3	2σ			U-Pb	n.r.							Extrusive
Ballato et al. 2016	NW Iran		MIA 12-30	37.2065	47.4037	10.8	0.2	2σ			U-Pb	n.r.							Extrusive
Ballato et al. 2016	NW Iran		MH 11-08	37.2189	47.3433	17.4	0.7	2σ			U-Pb	n.r.							Extrusive
Ballato et al. 2016	NW Iran		MH 11-09	37.2207	47.3439	17.4	0.8	2σ			U-Pb	n.r.							Extrusive
Ballato et al. 2016	NW Iran		MH 11-10	37.2212	47.3442	15.4	4	2σ			U-Pb	n.r.							Extrusive
Ballato et al. 2016	NW Iran		MIA 12-29	37.24	47.773	18.7	0.6	2σ			U-Pb	n.r.							Extrusive
Ballato et al. 2016	NW Iran		MH 11-02	37.2689	47.1849	16.1	1.2	2σ			U-Pb	n.r.							Extrusive
Ballato et al. 2016	NW Iran		MH 11-14	37.2752	47.7775	14.1	0.6	2σ			U-Pb	n.r.							Extrusive
Ballato et al. 2016	NW Iran		MH 11-12	37.3023	47.8127	19.8	0.9	2σ			U-Pb	n.r.							Extrusive
Ballato et al. 2016	NW Iran		MH 11-13	37.306	47.8483	18.6	0.7	2σ			U-Pb	n.r.							Extrusive
Ballato et al. 2016	NW Iran		MIA 12-32	37.3442	47.2726	18.4	0.4	2σ			U-Pb	n.r.							Extrusive
Bina et al. (1986)	UDMA	Hassan Abad		33.9586	51.4228	18.5	0.7	n.r.			K-Ar								Extrusive	rhyodacite
Bina et al. (1986)	UDMA	Hassan Abad		33.9586	51.4228	19.2	0.7	n.r.			K-Ar								Extrusive	rhyodacite
Bina et al. (1986)	Alborz	Karaj S		35.9028	50.9833	34	1.3	n.r.			K-Ar								Intrusive	sill
Bina et al. (1986)	Alborz	Karaj N		35.9583	51.0819	27	1.3	n.r.			K-Ar								Intrusive	diorite
Caillat et al. 1978	Saveh	Dehbala	453	35.5208	49.8822	41.5	2.5	n.r.			K-Ar	isochron							Intrusive	Granite
Caillat et al. 1978	Saveh	Dehbala	454	35.5208	49.8822	39.2	3.2	n.r.			K-Ar	isochron							Intrusive	Granite
Caillat et al. 1978	Saveh	Haji Abad	474	35.604	49.9435	39.2	3.2	n.r.			K-Ar	isochron							Intrusive	Microgranite
Caillat et al. 1978	Saveh	NW Saveh	406, 477	35.1205	50.2309	39.2	3.2	n.r.			K-Ar	isochron							Intrusive	Granite
Castro et al. 2013	Alborz	Abhar	AB-01	36.3312	49.16	38.3	0.17	1σ			U-Pb	SHRIMP							Intrusive	monzonite
Castro et al. 2013	Alborz	Abhar	AB-02	36.3312	49.16	38.9	0.42	1σ			U-Pb	SHRIMP							Intrusive	mafic unit
Castro et al. 2013	Alborz	Abhar	AB-03	36.3312	49.16	37.8	0.28	1σ			U-Pb	SHRIMP							Intrusive	mafic marginal zone
Castro et al. 2013	NW Iran	Mizan	YS-01	38.35	47.3747	24.7	0.27	1σ			U-Pb	SHRIMP							Intrusive	monzonite
Castro et al. 2013	NW Iran	Mizan	YS-02	38.35	47.3747	23.5	0.5	1σ			U-Pb	SHRIMP							Intrusive	monzogabbro
Chiu et al. (2013)	NW Iran	Sabalan-Astara	08-IR-ZS-79	38.4903	48.2233	42.1	0.3	2σ			Ar-Ar	No methods given							Extrusive	Basalt
Chiu et al. (2013)	NW Iran	Sabalan-Astara	08-IR-ZS-86	38.4161	48.4981	44.5	0.2	2σ			Ar-Ar	No methods given							Extrusive	Basalt
Chiu et al. (2013)	Central UDMA	Nain	10-IR-ZS-100	32.7153	52.8056	18.4	0.2	2σ			Ar-Ar	No methods given							Extrusive
Chiu et al. (2013)	Central UDMA	Nain	10-IR-ZS-101	33.0286	52.8183	31.9	0.2	2σ			Ar-Ar	No methods given							Extrusive
Chiu et al. (2013)	Central UDMA	Nain	08-IR-ZS-24	32.7408	52.8814	25	0.4	2σ			Ar-Ar	No methods given							Extrusive	Andesite
Chiu et al. (2013)	Central UDMA	Nain	08-IR-ZS-22	32.7622	52.9464	27.9	0.4	2σ			Ar-Ar	No methods given							Extrusive	Andesite
Chiu et al. (2013)	Central UDMA	Yazd	08-IR-ZS-17	31.5344	54.4519	51.4	0.4	2σ			Ar-Ar	No methods given							Extrusive	Andesite
Chiu et al. (2013)	Southeast UDMA	Anar-Sirjan	10-IR-ZS-81	30.5989	54.9211	32.5	0.2	2σ			Ar-Ar	No methods given							Extrusive	Basalt
Chiu et al. (2013)	Southeast UDMA	Kerman	10-IR-ZS-73	29.665	56.7622	17.6	0.1	2σ			Ar-Ar	No methods given							Extrusive	Basalt
Chiu et al. (2013)	Southeast UDMA	Kerman	10-IR-ZS-71	29.9225	56.9808	29	0.2	2σ			Ar-Ar	No methods given							Extrusive	Basalt
Chiu et al. (2013)	Southeast UDMA	Bam-Jiroft	10-IR-ZS-59	28.8375	57.8603	20.5	0.2	2σ			Ar-Ar	No methods given							Extrusive	Basalt
Chiu et al. (2013)	Southeast UDMA	Bam-Jiroft	10-IR-ZS-56	29.0211	57.9119	18.2	0.1	2σ			Ar-Ar	No methods given							Extrusive	Rhyolite
Chiu et al. (2013)	NW Iran	Sahand	08-IR-ZS-56	37.8769	46.1894	5.8	0.1	2σ			U-Pb	LA-ICP-MS							Extrusive	Ignimbrite
Chiu et al. (2013)	NW Iran	Sahand	08-IR-ZS-48	37.785	46.2589	6.5	0.1	2σ			U-Pb	LA-ICP-MS							Extrusive	Andesite
Chiu et al. (2013)	NW Iran	Sahand	08-IR-ZS-50	37.7644	46.2956	5.3	0.1	2σ			U-Pb	LA-ICP-MS							Extrusive	Ignimbrite
Chiu et al. (2013)	SSZ	Hamadan	09-IR-ZS-13	34.7578	48.4439	165.1	2	2σ			U-Pb	LA-ICP-MS							Intrusive	Leucogranite
Chiu et al. (2013)	SSZ	Hamadan	09-IR-ZS-14	34.7578	48.4439	163.9	1.8	2σ			U-Pb	LA-ICP-MS							Intrusive	Granite
Chiu et al. (2013)	NW Iran	Sabalan-Astara	08-IR-ZS-87	38.4394	48.5858	45.2	1.1	2σ			U-Pb	LA-ICP-MS							Extrusive	Basalt
Chiu et al. (2013)	NW Iran	Sabalan-Astara	08-IR-ZS-88	38.4394	48.5858	232.8	3.3	2σ			U-Pb	LA-ICP-MS							Extrusive
Chiu et al. (2013)	NW Iran	Sabalan-Astara	08-IR-ZS-88	38.3908	48.6586	45.3	0.5	2σ			U-Pb	LA-ICP-MS							Extrusive	Basalt
Chiu et al. (2013)	NW Iran	Qazvin	08-IR-ZS-46	36.065	49.6372	35.8	0.3	2σ			U-Pb	LA-ICP-MS							Extrusive	Basaltic andesite
Chiu et al. (2013)	Central UDMA	Qom	10-IR-ZS-106	34.3292	50.5108	17.4	0.2	2σ			U-Pb	LA-ICP-MS							Intrusive	Granodiorite
Chiu et al. (2013)	Central UDMA	Kashan-Natanz	08-IR-ZS-44	33.6114	51.2683	16.2	0.2	2σ			U-Pb	LA-ICP-MS							Extrusive	Andesite
Chiu et al. (2013)	Central UDMA	Kashan-Natanz	08-IR-ZS-43	33.6789	51.4222	16.9	0.2	2σ			U-Pb	LA-ICP-MS							Intrusive	Diorite
Chiu et al. (2013)	Central UDMA	Kashan-Natanz	08-IR-ZS-42	33.7281	51.4986	33.4	0.3	2σ			U-Pb	LA-ICP-MS							Intrusive	Microdiorite
Chiu et al. (2013)	Central UDMA	Kashan-Natanz	08-IR-ZS-39	33.5886	51.6183	30.8	0.4	2σ			U-Pb	LA-ICP-MS							Extrusive	Andesite
Chiu et al. (2013)	Central UDMA	Natanz	08-IR-ZS-32	33.5214	51.8444	21.2	0.3	2σ			U-Pb	LA-ICP-MS							Intrusive	Gabbro
Chiu et al. (2013)	Central UDMA	Natanz	08-IR-ZS-36	33.5147	51.8522	19.6	0.3	2σ			U-Pb	LA-ICP-MS							Intrusive	Granite
Chiu et al. (2013)	Central UDMA	Natanz	08-IR-ZS-30	33.3611	51.8747	56.5	2.6	2σ			U-Pb	LA-ICP-MS							Extrusive	Basalt
Chiu et al. (2013)	Central UDMA	Natanz	08-IR-ZS-30	33.3611	51.8747	278.2	2.9	2σ			U-Pb	LA-ICP-MS							Extrusive
Chiu et al. (2013)	SSZ	Esfahan	08-IR-ZS-27	32.315	51.9183	164.6	2.1	2σ			U-Pb	LA-ICP-MS							Intrusive	Granite
Chiu et al. (2013)	Central UDMA	Natanz	08-IR-ZS-31	33.4911	51.9219	20.2	0.3	2σ			U-Pb	LA-ICP-MS							Intrusive	Granodiorite
Chiu et al. (2013)	Central UDMA	Nain	10-IR-ZS-99	32.7236	52.6728	18.1	0.4	2σ			U-Pb	LA-ICP-MS							Extrusive	Andesite
Chiu et al. (2013)	Central UDMA	Nain	10-IR-ZS-100	32.7153	52.8056	16.4	0.2	2σ			U-Pb	LA-ICP-MS							Extrusive	Trachyandesite
Chiu et al. (2013)	Central UDMA	Nain	10-IR-ZS-101	33.0286	52.8183	30.1	0.9	2σ			U-Pb	LA-ICP-MS							Extrusive	Ignimbrite
Chiu et al. (2013)	Central UDMA	Nain	10-IR-ZS-103	33.045	52.8672	26.3	0.4	2σ			U-Pb	LA-ICP-MS							Extrusive	Andesite
Chiu et al. (2013)	Central UDMA	Nain	08-IR-ZS-23	32.7408	52.8814	37	0.4	2σ			U-Pb	LA-ICP-MS							Extrusive	Rhyolite
Chiu et al. (2013)	Central UDMA	Nain-Yazd	10-IR-ZS-97	32.3008	53.0797	34.7	0.4	2σ			U-Pb	LA-ICP-MS							Extrusive	Trachyandesite
Chiu et al. (2013)	Central UDMA	Nain-Yazd	10-IR-ZS-95	32.2731	53.1014	34.9	0.4	2σ			U-Pb	LA-ICP-MS							Extrusive	Andesite
Chiu et al. (2013)	Central UDMA	Nain-Yazd	10-IR-ZS-98	32.3214	53.11	37.8	0.6	2σ			U-Pb	LA-ICP-MS							Extrusive	Tuff
Chiu et al. (2013)	Central UDMA	Nain-Yazd	10-IR-ZS-93	32.2625	53.1761	35.1	0.4	2σ			U-Pb	LA-ICP-MS							Extrusive	Andesite
Chiu et al. (2013)	Central UDMA	Nain-Yazd	08-IR-ZS-20	32.3389	53.8414	42.9	0.4	2σ			U-Pb	LA-ICP-MS							Extrusive	Andesite
Chiu et al. (2013)	Central UDMA	Yazd	08-IR-ZS-14	31.5922	54.1239	166.1	1.5	2σ			U-Pb	LA-ICP-MS							Intrusive	Granodiorite
Chiu et al. (2013)	Central UDMA	Yazd	08-IR-ZS-15	31.6258	54.1319	166.8	1.7	2σ			U-Pb	LA-ICP-MS							Intrusive	Diorite
Chiu et al. (2013)	Central UDMA	Yazd	08-IR-ZS-16	31.5278	54.4494	47.8	1.2	2σ			U-Pb	LA-ICP-MS							Extrusive	Andesite
Chiu et al. (2013)	Southeast UDMA	Anar-Sirjan	10-IR-ZS-80	30.5989	54.9211	5.4	0.1	2σ			U-Pb	LA-ICP-MS							Intrusive	Granodiorite
Chiu et al. (2013)	Southeast UDMA	Anar-Sirjan	10-IR-ZS-79	30.4744	55.0081	9.4	0.1	2σ			U-Pb	LA-ICP-MS							Intrusive	Granodiorite
Chiu et al. (2013)	Southeast UDMA	Anar-Sirjan	10-IR-ZS-78	30.2319	55.3781	6.8	0.2	2σ			U-Pb	LA-ICP-MS							Extrusive	Ignimbrite
Chiu et al. (2013)	Southeast UDMA	Anar-Sirjan	10-IR-ZS-77	30.0019	55.7128	37.6	0.5	2σ			U-Pb	LA-ICP-MS							Extrusive	Andesite
Chiu et al. (2013)	Southeast UDMA	Anar-Sirjan	10-IR-ZS-76	29.9592	55.7153	6.5	0.1	2σ			U-Pb	LA-ICP-MS							Intrusive	Microdiorite
Chiu et al. (2013)	Southeast UDMA	Kerman	10-IR-ZS-74	29.6358	56.7161	23.6	0.4	2σ			U-Pb	LA-ICP-MS							Extrusive	Andesite
Chiu et al. (2013)	Southeast UDMA	Kerman	10-IR-ZS-72	29.6778	56.7833	29.3	0.3	2σ			U-Pb	LA-ICP-MS							Intrusive	Diorite
Chiu et al. (2013)	Southeast UDMA	Kerman	10-IR-ZS-70	29.5525	57.2969	29.7	0.5	2σ			U-Pb	LA-ICP-MS							Extrusive	Andesite
Chiu et al. (2013)	SSZ	Jiroft	10-IR-ZS-60	28.7242	57.4339	175.2	1.8	2σ			U-Pb	LA-ICP-MS							Intrusive	Granite
Chiu et al. (2013)	Southeast UDMA	Bam-Jiroft	10-IR-ZS-61	28.9172	57.6686	76.6	0.9	2σ			U-Pb	LA-ICP-MS							Intrusive	Gabbro
Chiu et al. (2013)	Southeast UDMA	Bam-Jiroft	10-IR-ZS-58	28.8653	57.8664	29.9	0.5	2σ			U-Pb	LA-ICP-MS							Intrusive	Diorite
Chiu et al. (2013)	Southeast UDMA	Bam-Jiroft	10-IR-ZS-57	29.0108	57.9069	31.1	0.4	2σ			U-Pb	LA-ICP-MS							Extrusive	Rhyolite
Chiu et al. (2013)	Southeast UDMA	Bam-Jiroft	10-IR-ZS-55	29.0211	57.9119	31.5	0.3	2σ			U-Pb	LA-ICP-MS							Extrusive	Green tuff
Chiu et al. (2013)	Southeast UDMA	Bam-Jiroft	10-IR-ZS-62	29.3158	57.9681	44.9	0.5	2σ			U-Pb	LA-ICP-MS							Extrusive	Andesite
Chiu et al. (2013)	Southeast UDMA	Bam-Jiroft	10-IR-ZS-53	29.1497	58.3683	38.6	0.4	2σ			U-Pb	LA-ICP-MS							Extrusive	Andesite
Chiu et al. (2013)	Southeast UDMA	Bazman	10-IR-ZS-44	27.7503	59.8639	72.1	0.9	2σ			U-Pb	LA-ICP-MS							Intrusive	Granodiorite
Chiu et al. (2013)	Southeast UDMA	Bazman	10-IR-ZS-39	27.7325	60.0853	81.1	0.9	2σ			U-Pb	LA-ICP-MS							Intrusive	Gabbro
Chiu et al. (2013)	Southeast UDMA	Bazman	10-IR-ZS-40	27.7325	60.0853	80.6	0.9	2σ			U-Pb	LA-ICP-MS							Intrusive	Diorite
Chiu et al. (2013)	Southeast UDMA	Bazman	10-IR-ZS-35	27.8319	60.2122	78.7	0.9	2σ			U-Pb	LA-ICP-MS							Intrusive	Granite
Chiu et al. 2017	Sistan	Zahedan	10-IR-ZS-15	29.3231	60.7344	29.9	0.3	2σ			U-Pb	LA-ICP-MS							Intrusive	Granite
Chiu et al. 2017	Sistan	Zahedan	10-IR-ZS-16	29.3653	60.7975	30	0.4	2σ			U-Pb	LA-ICP-MS							Intrusive	Diorite
Chiu et al. 2017	Sistan	Zahedan	10-IR-ZS-17	29.6558	60.7131	29	0.3	2σ			U-Pb	LA-ICP-MS							Intrusive	Granodiorite
Chiu et al. 2017	Sistan	Zahedan	10-IR-ZS-18	29.6558	60.7131	28.6	0.3	2σ			U-Pb	LA-ICP-MS							Intrusive	Andesitic dyke
Chiu et al. 2017	Sistan	Zahedan	10-IR-ZS-19	29.8856	60.8297	31.5	0.3	2σ			U-Pb	LA-ICP-MS							Intrusive	Diorite
Chiu et al. 2017	Central Iran	Saghand	08-IR-ZS-12	32.0011	55.5306	510.8	4.1	2σ			U-Pb	LA-ICP-MS							Extrusive	Rhyolite
Chiu et al. 2017	Central Iran	Saghand	08-IR-ZS-13	32.0017	55.5311	517.6	4.2	2σ			U-Pb	LA-ICP-MS							Intrusive	Granite
Chiu et al. 2017	Central Iran	Saghand	08-IR-ZS-09	32.4836	54.9747	44.1	0.4	2σ			U-Pb	LA-ICP-MS							Intrusive	Granite
Chiu et al. 2017	Central Iran	Saghand	08-IR-ZS-10	32.4836	54.9747	47.5	0.4	2σ			U-Pb	LA-ICP-MS							Intrusive	Granite
Chiu et al. 2017	Central Iran	Saghand	08-IR-ZS-11	32.4836	54.9747	45.1	0.5	2σ			U-Pb	LA-ICP-MS							Intrusive	Diorite
Chiu et al. 2017	Alborz	Tehran	07-IR-ZS-56	35.7394	51.9447	46.7	0.4	2σ			U-Pb	LA-ICP-MS							Extrusive	Green tuff
Chiu et al. 2017	Alborz	Tehran	08-IR-ZS-91	35.7517	52.05	50.2	0.7	2σ			U-Pb	LA-ICP-MS							Extrusive	Green tuff
Chiu et al. 2017	SSZ	Saqqez	14-IR-ZS-129	36.0199	46.3052	311.4	2.9	2σ			U-Pb	LA-ICP-MS							Intrusive	Granodiorite
Chiu et al. 2017	Alborz	Tehran	07-IR-ZS-52	36.0347	51.1986	45	0.7	2σ			U-Pb	LA-ICP-MS							Extrusive	Tuff
Chiu et al. 2017	SSZ	Saqqez	14-IR-ZS-131	36.0444	46.2922	349.2	3.5	2σ			U-Pb	LA-ICP-MS							Intrusive	Leucogranite
Chiu et al. 2017	Alborz	Mashhad	09-IR-ZS-01	36.1492	59.4069	203.3	2.6	2σ			U-Pb	LA-ICP-MS							Intrusive	Granodiorite
Chiu et al. 2017	Alborz	Mashhad	09-IR-ZS-03	36.2806	59.5575	218.7	2.2	2σ			U-Pb	LA-ICP-MS							Intrusive	Diorite
Chiu et al. 2017	Alborz	Lowshan	08-IR-ZS-90	36.5556	49.5231	38.2	0.5	2σ			U-Pb	LA-ICP-MS							Extrusive	Andesite
Chiu et al. 2017	SSZ	Naqadeh	14-IR-ZS-144	36.9095	45.4729	317.8	4	2σ			U-Pb	LA-ICP-MS							Intrusive	Granite
Chiu et al. 2017	SSZ	Naqadeh	14-IR-ZS-143	36.9138	45.4341	320.6	3.1	2σ			U-Pb	LA-ICP-MS							Intrusive	Granite
Chiu et al. 2017	SSZ	Marand	10-IR-ZS-110	38.3461	45.5708	556.1	7.1	2σ			U-Pb	LA-ICP-MS							Intrusive	Granite
Chiu et al. 2017	SSZ	Marand	10-IR-ZS-111	38.3514	45.5744	561.5	5.2	2σ			U-Pb	LA-ICP-MS							Intrusive	Granite
Chiu et al. 2017	SSZ	Marand	10-IR-ZS-112	38.3517	45.5742	565.1	5.8	2σ			U-Pb	LA-ICP-MS							Intrusive	Diorite
Deevsalar et al. 2018	SSZ	Malayer	MN2a	34.1404	48.7574	196.8	2	1σ			U-Pb	LA-ICP-MS							Intrusive	Gabbroic dike
Deevsalar et al. 2018	SSZ	Boroujerd	BR02	33.978	48.8016	166.93	0.72	1σ			U-Pb	LA-ICP-MS							Intrusive	Dioritic dike
Deevsalar et al. 2018	SSZ	Malayer	M50	34.2128	48.6741	47.1	0.7	1σ			U-Pb	LA-ICP-MS							Intrusive	Gabbroic dike
Deevsalar et al. 2018	SSZ	Malayer	M29	34.1045	48.8135	36.1	0.9	1σ			U-Pb	LA-ICP-MS							Intrusive	Gabbroic dike
Delavari et al. 2014	Sistan	Bibi-Maryam	MD4-26	31.8713	60.2323	58.6	2.1	2σ			U-Pb	SIMS							Intrusive
Guest et al. 2007	Alborz	Taleghan	20-49-3	36.4019	50.5597	0.51	0.06	2σ			Ar-Ar	Methods Heizler et al. 1999	FC-1	27.84 Ma (Deino and Potts, 1990)	Steiger and Jäger (1977)	Texas A&M University Research Reactor	New Mexico Geochronology Research Laboratory		Extrusive
Guest et al. 2007	Alborz	Taleghan	20-49-2	36.4019	50.5597	0.31	0.04	2σ			Ar-Ar	Methods Heizler et al. 1999	FC-1	27.84 Ma (Deino and Potts, 1990)	Steiger and Jäger (1977)	Texas A&M University Research Reactor	New Mexico Geochronology Research Laboratory		Extrusive
Guest et al. 2007	Alborz	Taleghan	19-57-2	36.2146	50.9102	1.4	0.21	2σ			Ar-Ar	Methods Heizler et al. 1999	FC-1	27.84 Ma (Deino and Potts, 1990)	Steiger and Jäger (1977)	Texas A&M University Research Reactor	New Mexico Geochronology Research Laboratory		Extrusive
Guest et al. 2007	Alborz	Taleghan	19-135-1	36.2225	51.0488	32.8	0.2	2σ	33.225	0.0518899	Ar-Ar	Methods Heizler et al. 1999	FC-1	27.84 Ma (Deino and Potts, 1990)	Steiger and Jäger (1977)	Texas A&M University Research Reactor	New Mexico Geochronology Research Laboratory		Extrusive					http://onlinelibrary.wiley.com/store/10.1029/2006TC002091/asset/supinfo/tect1927-sup-0002-ts01.txt?v=1&s=141017374e11c9f1d389e015dce12fb714ca0d5c
Guest et al. 2007	Alborz	Taleghan	19-133-1	36.2225	51.0488	32.7	0.3	2σ	33.1237	0.0764248	Ar-Ar	Methods Heizler et al. 1999	FC-1	27.84 Ma (Deino and Potts, 1990)	Steiger and Jäger (1977)	Texas A&M University Research Reactor	New Mexico Geochronology Research Laboratory		Extrusive					http://onlinelibrary.wiley.com/store/10.1029/2006TC002091/asset/supinfo/tect1927-sup-0002-ts01.txt?v=1&s=141017374e11c9f1d389e015dce12fb714ca0d5c
Guest et al. 2007	Alborz	Taleghan	19-137-1	36.3147	50.8946	8.47	0.15	2σ	8.57966	0.0380516	Ar-Ar	Methods Heizler et al. 1999	FC-1	27.84 Ma (Deino and Potts, 1990)	Steiger and Jäger (1977)	Texas A&M University Research Reactor	New Mexico Geochronology Research Laboratory		Extrusive					http://onlinelibrary.wiley.com/store/10.1029/2006TC002091/asset/supinfo/tect1927-sup-0002-ts01.txt?v=1&s=141017374e11c9f1d389e015dce12fb714ca0d5c
Guest et al. 2007	Alborz	Taleghan	4-84-2b	36.3398	50.8579	7.31	0.1	2σ	7.40463	0.0254455	Ar-Ar	Methods Heizler et al. 1999	FC-1	27.84 Ma (Deino and Potts, 1990)	Steiger and Jäger (1977)	Texas A&M University Research Reactor	New Mexico Geochronology Research Laboratory		Extrusive					http://onlinelibrary.wiley.com/store/10.1029/2006TC002091/asset/supinfo/tect1927-sup-0002-ts01.txt?v=1&s=141017374e11c9f1d389e015dce12fb714ca0d5c
Guest et al. 2007	Alborz	Taleghan	4-84-2a	36.3398	50.8579	7.06	0.08	2σ	7.1514	0.0204209	Ar-Ar	Methods Heizler et al. 1999	FC-1	27.84 Ma (Deino and Potts, 1990)	Steiger and Jäger (1977)	Texas A&M University Research Reactor	New Mexico Geochronology Research Laboratory		Extrusive					http://onlinelibrary.wiley.com/store/10.1029/2006TC002091/asset/supinfo/tect1927-sup-0002-ts01.txt?v=1&s=141017374e11c9f1d389e015dce12fb714ca0d5c
Guest et al. 2007	Alborz	Taleghan	4-86-3	36.3398	50.8579	6.68	0.07	2σ	6.76648	0.0178999	Ar-Ar	Methods Heizler et al. 1999	FC-1	27.84 Ma (Deino and Potts, 1990)	Steiger and Jäger (1977)	Texas A&M University Research Reactor	New Mexico Geochronology Research Laboratory		Extrusive					http://onlinelibrary.wiley.com/store/10.1029/2006TC002091/asset/supinfo/tect1927-sup-0002-ts01.txt?v=1&s=141017374e11c9f1d389e015dce12fb714ca0d5c
Guest et al. 2007	Alborz	Taleghan	3-87	36.1948	50.9237	2.86	0.83	2σ	2.89702	0.210023	Ar-Ar	Methods Heizler et al. 1999	FC-1	27.84 Ma (Deino and Potts, 1990)	Steiger and Jäger (1977)	Texas A&M University Research Reactor	New Mexico Geochronology Research Laboratory		Extrusive					http://onlinelibrary.wiley.com/store/10.1029/2006TC002091/asset/supinfo/tect1927-sup-0002-ts01.txt?v=1&s=141017374e11c9f1d389e015dce12fb714ca0d5c
Guest et al. 2007	Alborz	Taleghan	3-88	36.1948	50.9237	0.46	0.28	2σ	0.465954	0.0708972	Ar-Ar	Methods Heizler et al. 1999	FC-1	27.84 Ma (Deino and Potts, 1990)	Steiger and Jäger (1977)	Texas A&M University Research Reactor	New Mexico Geochronology Research Laboratory		Extrusive					http://onlinelibrary.wiley.com/store/10.1029/2006TC002091/asset/supinfo/tect1927-sup-0002-ts01.txt?v=1&s=141017374e11c9f1d389e015dce12fb714ca0d5c
Guest et al. 2007	Alborz	Taleghan	3-89	36.1948	50.9237	0.24	0.03	2σ	0.243106	0.00759719	Ar-Ar	Methods Heizler et al. 1999	FC-1	27.84 Ma (Deino and Potts, 1990)	Steiger and Jäger (1977)	Texas A&M University Research Reactor	New Mexico Geochronology Research Laboratory		Extrusive					http://onlinelibrary.wiley.com/store/10.1029/2006TC002091/asset/supinfo/tect1927-sup-0002-ts01.txt?v=1&s=141017374e11c9f1d389e015dce12fb714ca0d5c
Haghighi Bardineh et al. 2018	UDMA	Takht		35.5566	48.7227	16.8	0.24	2σ			U-Pb	LA-ICP-MS							Intrusive	Granodiorite
Honarmand et al. 2014	UDMA	Ghalhar	5-35	33.926	51.0887	18.89	0.92	2σ			U-Pb	LA-ICP-MS							Intrusive	intrusives
Honarmand et al. 2014	UDMA	Marfioun	3-24	33.886	51.0381	17.85	0.69	2σ			U-Pb	LA-ICP-MS							Intrusive	intrusives
Honarmand et al. 2017	SSZ	Hasan-Robat	HR10	33.4343	50.785	294.2	2.5	2σ			U-Pb	SIMS							Intrusive
Hosseinkhani et al. 2017	Lut			32.2022	58.3615	20.1	2.1	1σ			U-Pb	LA-ICP-MS							Intrusive	Hornblende diorite porphyry
Hosseinkhani et al. 2017	Lut			32.2022	58.3615	40.16	0.72	1σ			U-Pb	LA-ICP-MS							Intrusive	Biotite quartz monzonite
Jamshidi et al. 2018	NE Iran	Sabzevar	S-34	36.386	57.2649	46.62	0.89	2σ			U-Pb	SHRIMP							Intrusive	Post-ophiolite, southern region
Jamshidi et al. 2018	NE Iran	Sabzevar	S-35	36.386	57.2649	48.01	0.62	2σ			U-Pb	SHRIMP							Intrusive	Post-ophiolite, southern region
Jamshidi et al. 2018	NE Iran	Sabzevar	S-37	36.386	57.2649	49.09	0.77	2σ			U-Pb	SHRIMP							Intrusive	Post-ophiolite, southern region
Jamshidi et al. 2018	NE Iran	Sabzevar	S-40	36.386	57.2649	43.09	0.59	2σ			U-Pb	SHRIMP							Intrusive	Post-ophiolite, southern region
Jamshidi et al. 2018	NE Iran	Sabzevar	N-13	36.4872	56.9218	45.51	0.97	2σ			U-Pb	SHRIMP							Intrusive	Post-ophiolite, northern region
Jamshidi et al. 2018	NE Iran	Sabzevar	N-17	36.4727	57.5167	44.77	0.74	2σ			U-Pb	SHRIMP							Intrusive	Post-ophiolite, northern region
Jamshidi et al. 2018	NE Iran	Sabzevar	N-18	36.4727	57.5167	44.54	0.98	2σ			U-Pb	SHRIMP							Intrusive	Post-ophiolite, northern region
Jamshidi et al. 2018	NE Iran	Sabzevar	N-11	36.6086	56.9743	47.24	0.88	2σ			U-Pb	SHRIMP							Intrusive	Post-ophiolite, northern region
Kazemi et al. 2019	UDMA	Haji Abad	HG10	35.5992	50.02	40	0.7	1σ			U-Pb	LA-ICP-MS							Intrusive	Granodiorite
Mahmoudi et al. 2011	SSZ	Hasan Salary	SS-100	36.0556	46.2833	108.76	0.3	2σ			U-Pb	ID-TIMS							Intrusive
Mahmoudi et al. 2011	SSZ	Hasan Salary	SS-101	36.0236	46.2833	59.78	0.18	2σ			U-Pb	ID-TIMS							Intrusive
Mahmoudi et al. 2011	SSZ	Gorveh	SS-107	35.0917	47.2667	156.5	0.6	2σ			U-Pb	ID-TIMS							Intrusive
Mahmoudi et al. 2011	SSZ	Gorveh	SS-109	35.0642	47.8803	151	0.2	2σ			U-Pb	ID-TIMS							Intrusive
Mahmoudi et al. 2011	SSZ	Gorveh	SS-112	35.0611	47.8461	149.2	0.2	2σ			U-Pb	ID-TIMS							Intrusive
Mahmoudi et al. 2011	SSZ	Alvand	SS-119	35.7625	48.4392	165.2	0.2	2σ			U-Pb	ID-TIMS							Intrusive
Mahmoudi et al. 2011	SSZ	Alvand	SS-124	34.7589	48.4419	165	0.4	2σ			U-Pb	ID-TIMS							Intrusive
Mahmoudi et al. 2011	SSZ	Boroujerd	SS-130	33.6939	49.1122	169	1	2σ			U-Pb	ID-TIMS							Intrusive
Mahmoudi et al. 2011	SSZ	Boroujerd	SS-135	33.7189	49.2044	169.6	0.3	2σ			U-Pb	ID-TIMS							Intrusive
Mahmoudi et al. 2011	SSZ	Astaneh	SS-136	33.8011	49.3189	166.7	1.7	2σ			U-Pb	ID-TIMS							Intrusive
Mahmoudi et al. 2011	SSZ	Gosheh–Tavandasht	SS-128	33.6994	49.1639	34.87	0.08	2σ			U-Pb	ID-TIMS							Intrusive
Mazhari et al. 2017	NE Iran	Sangan	S1-49	34.441	60.4112	42.54	0.82	2σ			U-Pb	LA-ICP-MS							Intrusive	Biotite syenogranite
Mazhari et al. 2017	NE Iran	Sangan	S1-81	34.441	60.4112	43.9	1	2σ			U-Pb	LA-ICP-MS							Intrusive	Biotite syenogranite
McInnes et al. 2005	UDMA	Sar Cheshmeh		29.9847	55.8539	13.6	0.1	2σ			U-Pb	LA-ICP-MS							Intrusive
McInnes et al. 2005	UDMA	Meiduk		30.4204	55.1743	12.5	0.1	2σ			U-Pb	LA-ICP-MS							Intrusive
McInnes et al. 2005	UDMA	Adbar Kuh-e Masahim		30.4222	55.183	7.5	0.1	2σ			U-Pb	LA-ICP-MS							Intrusive
Mirnejad et al. (2013)	UDMA	Sarkuh		29.9217	55.7844	15.18	0.43	2σ			U-Pb	LA-ICP-MS							Intrusive	granite
Mirnejad et al. (2013)	UDMA	Iju		30.5381	54.9481	9.27	0.5	2σ			U-Pb	LA-ICP-MS							Intrusive	granite
Mirnejad et al. 2018	UDMA	Anjileh	AH5	34.7293	50.1499	20.37	0.41	n.r.			U-Pb	LA-ICP-MS							Intrusive	Granitoids
Mirnejad et al. 2018	UDMA	Sarabadan	SG13	34.7307	50.0944	19.07	0.25	n.r.			U-Pb	LA-ICP-MS							Intrusive	Granitoids
Mirnejad et al. 2018	UDMA	Navis	NG1	34.723	50.1979	19.47	0.16	n.r.			U-Pb	LA-ICP-MS							Intrusive	Granitoids
Mirnejad et al. 2018	UDMA	Ghahan	GN1	34.7181	50.2176	20.19	0.39	n.r.			U-Pb	LA-ICP-MS							Intrusive	Granitoids
Mirnejad et al. 2018	UDMA	Kasva	KA2	34.7284	50.1793	20.27	0.42	n.r.			U-Pb	LA-ICP-MS							Intrusive	Granitoids
Moghadam et al. (2015)	NW Iran	Kashmar	KR12-10	35.2879	58.5277	40.13	0.53	n.r.			U-Pb								Intrusive	Aplitic dike
Moghadam et al. (2015)	NW Iran	Kashmar	KR12-15	35.2879	58.5277	29.87	0.47	n.r.			U-Pb								Intrusive	Granodiorite
Moghadam et al. (2015)	NW Iran	Kashmar	KR12-29	35.292	58.7407	40.54	0.4	n.r.			U-Pb								Intrusive	Micro-granodioritic enclave
Moghadam et al. (2015)	NW Iran	Kashmar	KR12-9	35.293	58.7011	41.2	0.45	n.r.			U-Pb								Intrusive	Granodiorite
Moghadam et al. (2015)	NW Iran	Kashmar	KR12-9	35.293	58.7011	40.48	0.64	n.r.			U-Pb								Intrusive	Granodiorite
Moghadam et al. (2015)	NW Iran	Kashmar	KR12-46	35.3103	58.4177	41.09	0.3	n.r.			U-Pb								Intrusive	Monzogranite
Moghadam et al. 2013	UDMA	Nain	N09-21	33.1408	53.0386	101.2	0.2	2σ			U-Pb	ID-TIMS							Ophiolite	tonalitic dyke
Moghadam et al. 2013	UDMA	Nain	N09-28	32.9425	53.1019	102.7	0.2	2σ			U-Pb	ID-TIMS							Ophiolite	plagiogranite
Moghadam et al. 2013	UDMA	Dehshir	AZ06-25	31.2731	53.9453	100.4	0.1	2σ			U-Pb	ID-TIMS							Ophiolite	plagiogranite
Moghadam et al. 2013	UDMA	Dehshir	AZ06-24	31.2731	53.9453	100.9	0.2	2σ			U-Pb	ID-TIMS							Ophiolite	Diorite
Moghadam et al. 2013	UDMA	Dehshir	DZ05-6	31.2922	53.9019	99	1.1	2σ			U-Pb	ID-TIMS							Ophiolite	tonalite
Moghadam et al. 2014	NW Iran	Saray	E11-3	37.8175	45.4517	10.3	0.1	1σ	10.2991	0.10005	Ar-Ar		FCT 2 (28.201 ± 0.046 Ma; Kuiper et al., 2008)	28.201	Steiger and Jäger (1977)	8E of the U-enriched research reactor of McMaster University in Hamilton, Ont. Canada	CICESE’s Laboratorio de Geocronología		Extrusive
Moghadam et al. 2014	NW Iran	Saray	E11-18	37.81	45.4186	10.9	0.13	1σ	10.8991	0.129895	Ar-Ar		FCT 2 (28.201 ± 0.046 Ma; Kuiper et al., 2008)	28.201	Steiger and Jäger (1977)	8E of the U-enriched research reactor of McMaster University in Hamilton, Ont. Canada	CICESE’s Laboratorio de Geocronología		Extrusive
Moghadam et al. 2016	NE Iran	Sabzevar	SZ11-114	36.3688	57.2434	46.75	0.26	1σ	46.7529	0.259375	Ar-Ar	white mica	FCT 2 (28.201±0.046 Ma; Kuiper et al., 2008)	28.201	Steiger and Jäger (1977)	8E of the U-enriched research reactor of McMaster University in Hamilton, Ont. Canada	CICESE’s Laboratorio de Geocronología		Extrusive
Moghadam et al. 2016	NE Iran	Sabzevar	SZ11-222	36.3688	57.2434	46.44	0.11	1σ	46.4428	0.114671	Ar-Ar	dark mica	FCT 2 (28.201±0.046Ma; Kuiper et al., 2008)	28.201	Steiger and Jäger (1977)	8E of the U-enriched research reactor of McMaster University in Hamilton, Ont. Canada	CICESE’s Laboratorio de Geocronología		Extrusive
Moghadam et al. 2016	NE Iran	Sabzevar	8b	36.3688	57.2434	45.5	0.9	2σ			U-Pb	LA-ICP-MS							Extrusive
Moghadam et al. 2016	NE Iran	Sabzevar	5b	36.3688	57.2434	46.8	0.7	2σ			U-Pb	LA-ICP-MS							Extrusive
Moghadam et al. 2016	NE Iran	Sabzevar	20e	36.3688	57.2434	45.3	0.7	2σ			U-Pb	LA-ICP-MS							Extrusive
Mohammadi et al. 2016	Southeast Iran		227	29.6397	60.7621	42.7	0.3	2σ			U-Pb	LA-ICP-MS							Intrusive	Granodiorite
Mohammadi et al. 2016	Southeast Iran		229	29.9224	60.2652	43.3	0.2	2σ			U-Pb	LA-ICP-MS							Intrusive	Granite
Mohammadi et al. 2016	Southeast Iran		230	30.0001	60.277	44.3	0.2	2σ			U-Pb	LA-ICP-MS							Intrusive	Quartz-diorite
Mohammadi et al. 2016	Southeast Iran		231	30.0001	60.277	43.3	0.3	2σ			U-Pb	LA-ICP-MS							Intrusive	Granite
Mohammadi et al. 2016	Southeast Iran		241	27.9056	62.0934	43.8	0.1	2σ			U-Pb	LA-ICP-MS							Intrusive	Granite
Mohammadi et al. 2016	Southeast Iran		242	27.9133	62.1378	42.8	0.3	2σ			U-Pb	LA-ICP-MS							Intrusive	Granite
Mohammadi et al. 2016	Southeast Iran		243	28.3054	61.7921	40.5	0.2	2σ			U-Pb	LA-ICP-MS							Intrusive	Granite
Mohammadi et al. 2016	Southeast Iran		244	28.2855	61.744	43.6	0.3	2σ			U-Pb	LA-ICP-MS							Intrusive	Granite
Mohammadi et al. 2016	Southeast Iran		245	28.2771	61.7418	43.3	0.2	2σ			U-Pb	LA-ICP-MS							Intrusive	Granite
Mohammadi et al. 2016	Southeast Iran		225	29.6397	60.7621	28.9	0.6	2σ			U-Pb	LA-ICP-MS							Intrusive	Rhyolite dyke
Mohammadi et al. 2016	Southeast Iran		234	29.4224	60.733	30.5	0.1	2σ			U-Pb	LA-ICP-MS							Intrusive	Dacite dyke
Mohammadi et al. 2016	Southeast Iran		226	29.6397	60.7621	28.9	0.2	2σ			U-Pb	LA-ICP-MS							Intrusive	Granite
Mohammadi et al. 2016	Southeast Iran		233	29.4162	60.6972	29.7	0.3	2σ			U-Pb	LA-ICP-MS							Intrusive	Granite
Mohammadi et al. 2016	Southeast Iran		235	29.1779	60.9987	30.9	0.1	2σ			U-Pb	LA-ICP-MS							Intrusive	Granite
Mohammadi et al. 2016	Southeast Iran		236	29.1505	61.0046	30.8	0.1	2σ			U-Pb	LA-ICP-MS							Intrusive	Granite
Nabatian et al. (2014)	Alborz	Zaaker	N-SD19	36.5768	48.8332	41.1	1.9	2σ			U-Pb	LA-ICP-MS							Intrusive	Pyroxene-quartz monzonite (I-type)	high K/shoshonite
Nabatian et al. (2014)	Alborz	Morvarid	N-M16	36.5947	48.8127	39.7	1.2	2σ			U-Pb	LA-ICP-MS							Intrusive	Monzogranite (I-type)	high K/shoshonite
Nabatian et al. (2014)	Alborz	Zanjan	N-T19	36.6518	48.6928	37.4	1.6	2σ			U-Pb	LA-ICP-MS							Intrusive	Quartz monzodiorite (I-type)	high K/shoshonite
Nabatian et al. (2014)	Alborz	Zanjan	N-T52	36.7058	48.534	42.56	1.5	2σ			U-Pb	LA-ICP-MS							Intrusive	Pyroxene-quartz monzodiorite (I-type)	high K/shoshonite
Nabatian et al. 2014 - MD	Alborz	Tarom	M50	36.6235	48.8158	39.99	0.24	2σ			U-Pb								Intrusive	monzonite
Nabatian et al. 2016	Alborz	Tarom-Olya		36.8089	48.8068	36.1	0.8	2σ			U-Pb								Intrusive	diorite
Nabatian et al. 2016	Alborz	Tarom-Olya		36.8089	48.8068	36	1.1	2σ			U-Pb								Intrusive	monzonite
Nabatian et al. 2016	Alborz	Tarom-Olya		36.8089	48.8068	35.7	0.8	2σ			U-Pb								Intrusive	quartz monzonite
Nabatian et al. 2016	Alborz	Tarom-Olya		36.8089	48.8068	36.6	0.4	2σ			U-Pb								Intrusive	quartz monzonite
Nabatian et al. 2016	Alborz	Tarom-Olya		36.8089	48.8068	36.2	1.4	2σ			U-Pb								Intrusive	monzogranite
Nabatian et al. 2016	Alborz	Tarom-Olya		36.8089	48.8068	37.7	0.5	2σ			U-Pb								Intrusive	monzogranite
Nabatian et al. 2017	Alborz	Arjin	Aj-3	36.4033	48.6839	53	1	2σ			U-Pb	SIMS							Intrusive
Nabatian et al. 2017	Alborz	Khakriz	Kh2	36.4554	48.4486	55.32	0.44	2σ			U-Pb	SIMS							Intrusive
Nabatian et al. 2017	Alborz	Inche-Rahbari	In4	36.4437	48.3907	55.1	1.3	2σ			U-Pb	SIMS							Intrusive
Nazarinia et al. 2018	UDMA	Sarduiyeh	BA46	29.3	57.4	27.95	0.27	n.r.			U-Pb	LA-ICP-MS							Intrusive	Granodiorite
Nouri et al. (2016)	Zagros	Harsin	SAV1	34.3978	47.7328	94.6	2.7	2σ			U-Pb								Intrusive	volcanic/granitic
Nouri et al. (2016)	Zagros	Harsin	IR-FNH7	34.3978	47.7328	95	2.4	2σ			U-Pb								Intrusive	volcanic/granitic
Nouri et al. 2018	UDMA	Saveh	YN-1	35.1554	50.013	40.8	2.2	2σ			U-Pb	LA-ICP-MS							Intrusive	Diorite
Nouri et al. 2018	UDMA	Saveh	YN-15	35.1207	50.2204	37	2.3	2σ			U-Pb	LA-ICP-MS							Intrusive	Granodiorite
Pang et al. (2013)	Lut	~ 11 km SW of Dehsalm	10-02	31.1625	59.1042	46.3	0.1	1σ	46.5839	0.105961	Ar-Ar		biotite standard LP-6 (128.5 ± 0.5 Ma) and calibrated by Fish Canyon sanidine (28.03 ± 0.08 Ma) (Jourdan and Renne, 2007)		Steiger and Jäger (1977)				Extrusive	Andesite
Pang et al. (2013)	Lut	~ 10 km from sample 10-01	10-03	31.1625	59.1042	46.4	0.5	1σ	46.6845	0.498077	Ar-Ar		biotite standard LP-6 (128.5 ± 0.5 Ma) and calibrated by Fish Canyon sanidine (28.03 ± 0.08 Ma) (Jourdan and Renne, 2007)		Steiger and Jäger (1977)				Extrusive	Rhyolite
Pang et al. (2013)	Lut	~ 10 km SW of Dehsalm	10-01	31.1644	59.2031	41.4	0.2	1σ	41.6534	0.201666	Ar-Ar		biotite standard LP-6 (128.5 ± 0.5 Ma) and calibrated by Fish Canyon sanidine (28.03 ± 0.08 Ma) (Jourdan and Renne, 2007)		Steiger and Jäger (1977)				Extrusive	Andesite
Pang et al. (2013)	Lut	SE of Nehbandan	10-11	31.2219	60.3278	42.4	0.3	1σ	42.6596	0.300252	Ar-Ar		biotite standard LP-6 (128.5 ± 0.5 Ma) and calibrated by Fish Canyon sanidine (28.03 ± 0.08 Ma) (Jourdan and Renne, 2007)		Steiger and Jäger (1977)				Extrusive	Andesite	Adakite
Pang et al. (2013)	Lut	Between Tosian and Doroh	07-48	32.3633	60.3853	44.4	0.6	1σ	44.6721	0.597417	Ar-Ar		biotite standard LP-6 (128.5 ± 0.5 Ma) and calibrated by Fish Canyon sanidine (28.03 ± 0.08 Ma) (Jourdan and Renne, 2007)		Steiger and Jäger (1977)				Extrusive	Dacite	Adakite
Pang et al. (2013)	Lut	Kuhe Shah near Shah Soliman	07-30	32.3969	58.0208	39.3	0.4	1σ	39.5403	0.39936	Ar-Ar		biotite standard LP-6 (128.5 ± 0.5 Ma) and calibrated by Fish Canyon sanidine (28.03 ± 0.08 Ma) (Jourdan and Renne, 2007)		Steiger and Jäger (1977)				Extrusive	Andesite
Pang et al. (2013)	Lut	Mansoor Abad	07-31	32.4239	59.2614	37.1	0.2	1σ	37.3267	0.201367	Ar-Ar		biotite standard LP-6 (128.5 ± 0.5 Ma) and calibrated by Fish Canyon sanidine (28.03 ± 0.08 Ma) (Jourdan and Renne, 2007)		Steiger and Jäger (1977)				Extrusive	Andesite
Pang et al. (2013)	Lut	S of Govalg	08-97	32.4239	59.0306	39.1	0.5	1σ	39.3391	0.498664	Ar-Ar		biotite standard LP-6 (128.5 ± 0.5 Ma) and calibrated by Fish Canyon sanidine (28.03 ± 0.08 Ma) (Jourdan and Renne, 2007)		Steiger and Jäger (1977)				Extrusive	Andesite
Pang et al. (2013)	Lut	Near Salmabad	07-23	32.5528	59.8183	27.7	0.2	1σ	27.8686	0.200915	Ar-Ar		biotite standard LP-6 (128.5 ± 0.5 Ma) and calibrated by Fish Canyon sanidine (28.03 ± 0.08 Ma) (Jourdan and Renne, 2007)		Steiger and Jäger (1977)				Extrusive	Andesite
Pang et al. (2013)	Lut	Fanood	Z-33-85	32.6472	59.4867	25.5	0.1	1σ	25.6551	0.101964	Ar-Ar		biotite standard LP-6 (128.5 ± 0.5 Ma) and calibrated by Fish Canyon sanidine (28.03 ± 0.08 Ma) (Jourdan and Renne, 2007)		Steiger and Jäger (1977)				Extrusive	Andesite
Pang et al. (2013)	Lut	Fanood	07-09	32.6475	59.4886	29.6	0.2	1σ	29.7803	0.200984	Ar-Ar		biotite standard LP-6 (128.5 ± 0.5 Ma) and calibrated by Fish Canyon sanidine (28.03 ± 0.08 Ma) (Jourdan and Renne, 2007)		Steiger and Jäger (1977)				Extrusive	Dacite
Pang et al. (2013)	Lut	Near Sarbishe perlite	07-26	32.6569	59.7211	27.5	0.2	1σ	27.6674	0.200909	Ar-Ar		biotite standard LP-6 (128.5 ± 0.5 Ma) and calibrated by Fish Canyon sanidine (28.03 ± 0.08 Ma) (Jourdan and Renne, 2007)		Steiger and Jäger (1977)				Extrusive	Dacite
Pang et al. (2013)	Lut	Give Shad Mountain	07-12	32.6611	59.6772	39.5	0.6	1σ	39.7416	0.597992	Ar-Ar		biotite standard LP-6 (128.5 ± 0.5 Ma) and calibrated by Fish Canyon sanidine (28.03 ± 0.08 Ma) (Jourdan and Renne, 2007)		Steiger and Jäger (1977)				Extrusive	Andesite
Pang et al. (2013)	Lut	~ 55 km S of Dihok	08-04	32.6964	57.8117	39.4	1	1σ	39.641	0.995795	Ar-Ar		biotite standard LP-6 (128.5 ± 0.5 Ma) and calibrated by Fish Canyon sanidine (28.03 ± 0.08 Ma) (Jourdan and Renne, 2007)		Steiger and Jäger (1977)				Extrusive	Dacite	Adakite
Pang et al. (2013)	Lut	Romenjan Mountain	07-13	32.7164	59.2167	39.4	0.4	1σ	39.641	0.399355	Ar-Ar		biotite standard LP-6 (128.5 ± 0.5 Ma) and calibrated by Fish Canyon sanidine (28.03 ± 0.08 Ma) (Jourdan and Renne, 2007)		Steiger and Jäger (1977)				Extrusive	Andesite
Pang et al. (2013)	Lut	Rich Mountain	07-11	32.7775	59.0428	39.1	0.7	1σ	39.3391	0.697463	Ar-Ar		biotite standard LP-6 (128.5 ± 0.5 Ma) and calibrated by Fish Canyon sanidine (28.03 ± 0.08 Ma) (Jourdan and Renne, 2007)		Steiger and Jäger (1977)				Extrusive	Andesite
Pang et al. (2013)	Lut	S of Dyhook	08-05	32.7817	57.7658	38.3	0.3	1σ	38.5341	0.300234	Ar-Ar		biotite standard LP-6 (128.5 ± 0.5 Ma) and calibrated by Fish Canyon sanidine (28.03 ± 0.08 Ma) (Jourdan and Renne, 2007)		Steiger and Jäger (1977)				Extrusive	Andesite
Pang et al. (2013)	Lut	Haji Mohammad Nori quarry	07-01	32.9211	59.3239	31.4	0.4	1σ	31.5914	0.399772	Ar-Ar		biotite standard LP-6 (128.5 ± 0.5 Ma) and calibrated by Fish Canyon sanidine (28.03 ± 0.08 Ma) (Jourdan and Renne, 2007)		Steiger and Jäger (1977)				Extrusive	Dacite	Adakite
Pang et al. (2013)	Lut	Markuh	07-02	32.9561	59.3303	31	0.5	1σ	31.189	0.4994	Ar-Ar		biotite standard LP-6 (128.5 ± 0.5 Ma) and calibrated by Fish Canyon sanidine (28.03 ± 0.08 Ma) (Jourdan and Renne, 2007)		Steiger and Jäger (1977)				Extrusive	Dacite	Adakite
Pang et al. (2013)	Lut	N of Khoshineh	08-01	32.9633	59.5339	42.6	0.5	1σ	42.8608	0.498374	Ar-Ar		biotite standard LP-6 (128.5 ± 0.5 Ma) and calibrated by Fish Canyon sanidine (28.03 ± 0.08 Ma) (Jourdan and Renne, 2007)		Steiger and Jäger (1977)				Extrusive	Dacite	Adakite
Pang et al. (2013)	Lut	~ 10 km E of Arababad	08-03	33	57.7833	39.9	0.5	1σ	40.1441	0.498596	Ar-Ar		biotite standard LP-6 (128.5 ± 0.5 Ma) and calibrated by Fish Canyon sanidine (28.03 ± 0.08 Ma) (Jourdan and Renne, 2007)		Steiger and Jäger (1977)				Extrusive	Dacite
Pang et al. (2013)	Lut	Near Sikhe Khor	08-02	33.0006	58.35	43.4	0.4	1σ	43.6658	0.399187	Ar-Ar		biotite standard LP-6 (128.5 ± 0.5 Ma) and calibrated by Fish Canyon sanidine (28.03 ± 0.08 Ma) (Jourdan and Renne, 2007)		Steiger and Jäger (1977)				Extrusive	Rhyolite
Pang et al. 2012	Lut		Z-50-85	32.4917	60.3261	11	0.2	2σ	11.0706	0.0503636	Ar-Ar		biotite standard LP-6 (128.5 ± 0.5 Ma) and calibrated by Fish Canyon sanidine (28.02 ± 0.28 Ma) (Renne et al. 1998)		Steiger and Jäger (1977)	VT-C position at the THOR Reactor at Taiwan	Argon isotopes were measured using Varian-MAT GD150 and VG3600 mass spectrometers at Department of Geosciences, National Taiwan University, Taiwan		Extrusive
Pang et al. 2012	Lut		Z-B-1-85	32.4569	60.2119	10.1	0.1	2σ	10.1648	0.0254173	Ar-Ar								Extrusive
Pang et al. 2012	Lut		Z-BKH- 1	31.6056	60.1981	4.23	0.14	2σ	4.25711	0.0352247	Ar-Ar								Extrusive
Pang et al. 2012	Lut		08-06.	32.9525	57.3408	14.3	0.2	2σ	14.3919	0.0504515	Ar-Ar								Extrusive
Pang et al. 2016	Southeast UDMA	KMP	10-88	30.7714	54.8303	1.15	0.03	2σ			U-Pb								Extrusive
Pang et al. 2016	Southeast UDMA	KAP	10-83	30.835	54.8744	1.25	0.05	2σ			U-Pb								Extrusive
Pang et al. 2016	Southeast UDMA	KAP	10-84	30.835	54.8744	2.15	0.08	2σ			U-Pb								Extrusive
Rossetti et al. 2014	NE Iran	Sabzevar	CHILI	35.43	58.8898	57.9	2.4	2σ			U-Pb	LA-ICP-MS							Intrusive	granitoid
Sarjoughian & Kananian 2017	UDMA	Feshark		32.8787	52.3557	20.5	0.8	2σ			U-Pb	LA-ICP-MS							Intrusive	granodiorite
Sarjoughian & Kananian 2017	UDMA	Mehrabad		33.0641	52.9497	36.8	0.5	2σ			U-Pb	LA-ICP-MS							Intrusive	granodiorite
Sarjoughian & Kananian 2017	UDMA	Zafarghand		33.0762	52.336	24.6	0.5	2σ			U-Pb	LA-ICP-MS							Intrusive	granodiorite
Sarjoughian & Kananian 2017	UDMA	Nasrand		33.1195	52.5157	36.5	0.5	2σ			U-Pb	LA-ICP-MS							Intrusive	granodiorite
Sarjoughian & Kananian 2017	UDMA	Kuh-e Dom		33.7493	52.9135	53.9	0.4	2σ			U-Pb	LA-ICP-MS							Intrusive	diorite
Sarjoughian & Kananian 2017	UDMA	Kuh-e Dom		33.7493	52.9135	51.1	0.4	2σ			U-Pb	LA-ICP-MS							Intrusive	granodiorite
Sepidbar et al. 2018	Lut		SG3-7	34.4835	60.5582	42.4	0.6	n.r.			U-Pb								Extrusive	Trachyte
Sepidbar et al. 2018	Lut		SG5-7-1	34.4835	60.5582	42.7	0.5	n.r.			U-Pb								Extrusive	Dacite
Sepidbar et al. 2018	Lut		SG8-1	34.4835	60.5582	43.5	0.6	n.r.			U-Pb								Extrusive	Trachydacite
Sepidbar et al. 2018	Lut		SG8-5	34.4835	60.5582	43.6	0.9	n.r.			U-Pb								Extrusive	Trachydacite
Sepidbar et al. 2018	Lut		GRA-1	34.4835	60.5582	41.5	0.6	n.r.			U-Pb								Intrusive	Syenogranite
Sepidbar et al. 2018	Lut		SG-12	34.4835	60.5582	42.6	0.5	n.r.			U-Pb								Extrusive	Ignimbrite
Sepidbar et al. 2019	Southeast UDMA		KH-3	29.4819	56.7927	25.31	0.77	n.r.			U-Pb	Ages in text and figures are different, ones from text are taken							Intrusive	Granodiorite, but supplementary material says tonalite
Sepidbar et al. 2019	Southeast UDMA		KH-4	29.5099	56.7095	23.57	0.5	n.r.			U-Pb	Ages in text and figures are different, ones from text are taken							Intrusive	Granodiorite, but supplementary material says tonalite
Sepidbar et al. 2019	Southeast UDMA		KH-17	29.6124	56.829	22.5	1.3	n.r.			U-Pb	Ages in text and figures are different, ones from text are taken							Intrusive	Granodiorite, but supplementary material says tonalite
Sepidbar et al. 2019	Southeast UDMA		KH-26	29.6591	56.7856	29.4	0.6	n.r.			U-Pb	Ages in text and figures are different, ones from text are taken							Intrusive	Quartz monzonite, but supplementary material says syenite
Shafaroudi et al. 2014	Lut	Khopik		32.3803	58.9321	39	0.8	n.r.			U-Pb	LA-ICP-MS							Intrusive
Shafaroudi et al. 2014	Lut	Khopik		32.3803	58.9321	38.2	0.8	n.r.			U-Pb	LA-ICP-MS							Intrusive
Shahbazi et al. 2010	SSZ		SH104	34.8528	48.4069	166.6	4.8	2σ			U-Pb	ID-TIMS							Intrusive
Shahbazi et al. 2010	SSZ		SH110	34.8542	48.4128	166.5	1.9	2σ			U-Pb	ID-TIMS							Intrusive
Shahbazi et al. 2010	SSZ		SH152	34.8542	48.4128	163.9	0.9	2σ			U-Pb	ID-TIMS							Intrusive
Shahbazi et al. 2010	SSZ		SH210	34.8542	48.4128	163.2	1.1	2σ			U-Pb	ID-TIMS							Intrusive
Shahbazi et al. 2010	SSZ		SH219	34.8542	48.4128	161.9	5.3	2σ			U-Pb	ID-TIMS							Intrusive
Shahbazi et al. 2010	SSZ		SH72	34.8542	48.4128	164.2	5.4	2σ			U-Pb	ID-TIMS							Intrusive
Shahbazi et al. 2010	SSZ		SH186	34.8542	48.4128	153.3	2.7	2σ			U-Pb	ID-TIMS							Intrusive
Shahbazi et al. 2010	SSZ		SH243	34.8542	48.4128	154.4	1.3	2σ			U-Pb	ID-TIMS							Intrusive
Siani et al. 2015	Alborz	Goljin	F393-3	37.1113	48.4345	41.87	1.58	1σ	41.7189	1.55684	Ar-Ar		Taylor Creek Rhyolite (TCR) flux moni- tor and pure (zero age) K2SO4 and CaF2 salts	28.619	newly proposed decay constant for 40 K after Renne et al. 2011	IFE (Institutt for En- ergiteknikk) in Kjeller, Norway, for 106 hours with a nom- inal neutron flux of 1.3 × 1013n * (cm−2 · s−1). The correc- tion factors for the production of isotopes from Ca were determined determined to be (39Ar/37Ar)Ca = (7.907 ± 0.0653)·10−4, (36Ar/37Ar)Ca = (3.1122 ± 0.0473)·10−4 and (40Ar/39Ar)K = (1.614698 ± 0.12631)·10−2 for the production of K (errors quoted at 1σ).			Intrusive
Siani et al. 2015	Alborz	North Glojeh	G2	37.0989	48.356	42.2	0.34	1σ	42.0478	0.336562	Ar-Ar		Taylor Creek Rhyolite (TCR) flux moni- tor and pure (zero age) K2SO4 and CaF2 salts	28.619	newly proposed decay constant for 40 K after Renne et al. 2011	IFE (Institutt for En- ergiteknikk) in Kjeller, Norway, for 106 hours with a nom- inal neutron flux of 1.3 × 1013n * (cm−2 · s−1). The correc- tion factors for the production of isotopes from Ca were determined determined to be (39Ar/37Ar)Ca = (7.907 ± 0.0653)·10−4, (36Ar/37Ar)Ca = (3.1122 ± 0.0473)·10−4 and (40Ar/39Ar)K = (1.614698 ± 0.12631)·10−2 for the production of K (errors quoted at 1σ).			Intrusive
Siani et al. 2015	Alborz	South Glojeh	G1	37.0609	48.3442	42.56	1.47	1σ	42.4066	1.44825	Ar-Ar		Taylor Creek Rhyolite (TCR) flux moni- tor and pure (zero age) K2SO4 and CaF2 salts	28.619	newly proposed decay constant for 40 K after Renne et al. 2011	IFE (Institutt for En- ergiteknikk) in Kjeller, Norway, for 106 hours with a nom- inal neutron flux of 1.3 × 1013n * (cm−2 · s−1). The correc- tion factors for the production of isotopes from Ca were determined determined to be (39Ar/37Ar)Ca = (7.907 ± 0.0653)·10−4, (36Ar/37Ar)Ca = (3.1122 ± 0.0473)·10−4 and (40Ar/39Ar)K = (1.614698 ± 0.12631)·10−2 for the production of K (errors quoted at 1σ).			Intrusive
Siani et al. 2015	Alborz	Varmarziar		37.1403	48.3171	39.08	0.37	1σ	38.9385	0.366068	Ar-Ar		Taylor Creek Rhyolite (TCR) flux moni- tor and pure (zero age) K2SO4 and CaF2 salts	28.619	newly proposed decay constant for 40 K after Renne et al. 2011	IFE (Institutt for En- ergiteknikk) in Kjeller, Norway, for 106 hours with a nom- inal neutron flux of 1.3 × 1013n * (cm−2 · s−1). The correc- tion factors for the production of isotopes from Ca were determined determined to be (39Ar/37Ar)Ca = (7.907 ± 0.0653)·10−4, (36Ar/37Ar)Ca = (3.1122 ± 0.0473)·10−4 and (40Ar/39Ar)K = (1.614698 ± 0.12631)·10−2 for the production of K (errors quoted at 1σ).			Intrusive
Siani et al. 2015	Alborz	Varmarziar		37.1403	48.3171	39.07	0.16	1σ	38.9285	0.160722	Ar-Ar		Taylor Creek Rhyolite (TCR) flux moni- tor and pure (zero age) K2SO4 and CaF2 salts	28.619	newly proposed decay constant for 40 K after Renne et al. 2011	IFE (Institutt for En- ergiteknikk) in Kjeller, Norway, for 106 hours with a nom- inal neutron flux of 1.3 × 1013n * (cm−2 · s−1). The correc- tion factors for the production of isotopes from Ca were determined determined to be (39Ar/37Ar)Ca = (7.907 ± 0.0653)·10−4, (36Ar/37Ar)Ca = (3.1122 ± 0.0473)·10−4 and (40Ar/39Ar)K = (1.614698 ± 0.12631)·10−2 for the production of K (errors quoted at 1σ).			Intrusive
Simmonds and Moazzen 2015	NW Iran	Qarachilar		38.8433	46.36	24.8	2.5	2σ			Re-Os								Intrusive
Simmonds et al. (2016)	NW Iran	Sungun		38.7075	46.7041	20.1	0.4	n.r.			U-Pb								Intrusive	monzonite
Simmonds et al. (2016)	NW Iran	Sungun		38.7075	46.7041	22.5	0.4	n.r.			U-Pb								Intrusive	monzonite
Verdel et al. (2011)	UDMA	TF4A		34.7336	50.0213	56.61	1.93	1σ	56.61	1.93	Ar-Ar								Extrusive	plagioclase from tuff
Verdel et al. (2011)	Alborz	Mobarak-abad gabbro		35.7827	51.959	37.2	0.38	1σ	37.2	0.38	Ar-Ar								Extrusive	biotite from gabbro intruded into Karaj fm
Verdel et al. (2011)	UDMA	TF3		34.7331	50.0213	54.7	3.1	2σ			U-Pb								Extrusive	zircons from andesite
Verdel et al. (2011)	UDMA	TF6		34.7468	50.0322	52.9	3.3	2σ			U-Pb								Extrusive
Verdel et al. (2011)	UDMA	TF7A		34.7616	50.0452	47.4	1.7	2σ			U-Pb								Extrusive
Verdel et al. (2011)	UDMA	TF11		34.7952	50.0718	44.3	2.2	2σ			U-Pb								Extrusive
Verdel et al. (2011)	UDMA	SA2		35.1205	50.9496	37.3	1.2	2σ			U-Pb								Extrusive	zircons from tuff
Verdel et al. (2011)	UDMA	TR1		35.4807	54.3117	52.2	3.4	2σ			U-Pb								Extrusive	zircons from tuff
Verdel et al. (2011)	Alborz	AB4		35.9467	51.0827	41.1	1.6	2σ			U-Pb								Extrusive	Upper Tuff of Karaj fm
Verdel et al. (2011)	Alborz	AB2		36.0344	51.3135	49.3	2.9	2σ			U-Pb								Extrusive	zircon Middle Tuff of Karaj fm
Verdel et al. (2011)	Alborz	Ek5		36.039	51.183	45.3	2.3	2σ			U-Pb								Extrusive	Tuff within Asara Shale of Karaj fm
Vincent et al. 2005	Talysh	Peshtasar	TA87.1	38.9131	48.1245	38.3	0.4	1σ	38.7961	0.402093	Ar-Ar		muscovite standard (“PM-1”) as monitor, Fish Canyon Tuff FCT3 standard	165.3; 27.84		Aliquots of plagioclase and whole rock were irradiated in one of two packages: 67 which was for 24 hours in the L-67 position of Ford Nuclear Reactor at the University of Michigan; or, 69 which was for 21 hours in the McMaster Nuclear Reactor of McMaster University			Extrusive
Vincent et al. 2005	Talysh	Arkevan	TA82.1	38.9501	48.5035	39.2	0.4	1σ	39.7078	0.40205	Ar-Ar		muscovite standard (“PM-1”) as monitor, Fish Canyon Tuff FCT3 standard	165.3; 27.84		Aliquots of plagioclase and whole rock were irradiated in one of two packages: 67 which was for 24 hours in the L-67 position of Ford Nuclear Reactor at the University of Michigan; or, 69 which was for 21 hours in the McMaster Nuclear Reactor of McMaster University			Extrusive
Vincent et al. 2005	Talysh	Arkevan	TA82.1	38.9501	48.5035	39.2	0.4	1σ	39.7078	0.40205	Ar-Ar		muscovite standard (“PM-1”) as monitor, Fish Canyon Tuff FCT3 standard	165.3; 27.84		Aliquots of plagioclase and whole rock were irradiated in one of two packages: 67 which was for 24 hours in the L-67 position of Ford Nuclear Reactor at the University of Michigan; or, 69 which was for 21 hours in the McMaster Nuclear Reactor of McMaster University			Extrusive
Vincent et al. 2005	Talysh	Peshtasar	TA9.1	38.7202	48.4245	39.7	0.4	1σ	40.2143	0.402026	Ar-Ar		muscovite standard (“PM-1”) as monitor, Fish Canyon Tuff FCT3 standard	165.3; 27.84		Aliquots of plagioclase and whole rock were irradiated in one of two packages: 67 which was for 24 hours in the L-67 position of Ford Nuclear Reactor at the University of Michigan; or, 69 which was for 21 hours in the McMaster Nuclear Reactor of McMaster University			Extrusive
Vincent et al. 2005	Talysh	Peshtasar	TA9.1	38.7202	48.4245	41.9	0.4	1σ	42.4427	0.401927	Ar-Ar		muscovite standard (“PM-1”) as monitor, Fish Canyon Tuff FCT3 standard	165.3; 27.84		Aliquots of plagioclase and whole rock were irradiated in one of two packages: 67 which was for 24 hours in the L-67 position of Ford Nuclear Reactor at the University of Michigan; or, 69 which was for 21 hours in the McMaster Nuclear Reactor of McMaster University			Extrusive
Vincent et al. 2005	Talysh	Peshtasar	TA92.6	38.8594	48.0491	40.5	0.4	1σ	41.0246	0.401989	Ar-Ar		muscovite standard (“PM-1”) as monitor, Fish Canyon Tuff FCT3 standard	165.3; 27.84		Aliquots of plagioclase and whole rock were irradiated in one of two packages: 67 which was for 24 hours in the L-67 position of Ford Nuclear Reactor at the University of Michigan; or, 69 which was for 21 hours in the McMaster Nuclear Reactor of McMaster University			Extrusive
Vincent et al. 2005	Talysh	Peshtasar	TA92.6	38.8594	48.0491	40.6	0.4	1σ	41.1259	0.401984	Ar-Ar		muscovite standard (“PM-1”) as monitor, Fish Canyon Tuff FCT3 standard	165.3; 27.84		Aliquots of plagioclase and whole rock were irradiated in one of two packages: 67 which was for 24 hours in the L-67 position of Ford Nuclear Reactor at the University of Michigan; or, 69 which was for 21 hours in the McMaster Nuclear Reactor of McMaster University			Extrusive
Vincent et al. 2005	Talysh	Astara	TA77.1	38.516	48.6622	40.7	0.4	1σ	41.2272	0.40198	Ar-Ar		muscovite standard (“PM-1”) as monitor, Fish Canyon Tuff FCT3 standard	165.3; 27.84		Aliquots of plagioclase and whole rock were irradiated in one of two packages: 67 which was for 24 hours in the L-67 position of Ford Nuclear Reactor at the University of Michigan; or, 69 which was for 21 hours in the McMaster Nuclear Reactor of McMaster University			Extrusive
Vincent et al. 2005	Talysh	Astara	TA77.1	38.516	48.6622	42.8	0.4	1σ	43.3544	0.401888	Ar-Ar		muscovite standard (“PM-1”) as monitor, Fish Canyon Tuff FCT3 standard	165.3; 27.84		Aliquots of plagioclase and whole rock were irradiated in one of two packages: 67 which was for 24 hours in the L-67 position of Ford Nuclear Reactor at the University of Michigan; or, 69 which was for 21 hours in the McMaster Nuclear Reactor of McMaster University			Extrusive
Whitechurch et al. (2013)	Zagros	Kermanshah	209	34.3516	47.7888	56	9	n.r.			K-Ar								Intrusive	diorite
Whitechurch et al. (2013)	Zagros	Kamyaran		34.688	47.01	26.5	2.4	n.r.			K-Ar								Intrusive	diorite
Yeganehfar et al. 2013	UDMA	Nain	HN55	32.7333	52.7833	26.5	0.59	n.r.			K-Ar								Extrusive	Basaltic andesite
Yeganehfar et al. 2013	UDMA	Nain	HK42	32.75	52.8833	19.7	0.44	n.r.			K-Ar								Extrusive	Basaltic andesite
Yeganehfar et al. 2013	UDMA	Nain	LZ80	32.8167	52.7167	20.55	0.49	n.r.			K-Ar								Extrusive	Basalt
Yeganehfar et al. 2013	UDMA	Nain	ADA60	33	52.6333	18.67	0.87	n.r.			K-Ar								Extrusive	Basalt
Rabiee et al. 2019	UDMA	Siah-Kamar	MN03	37.3992	47.5952	32.8	1.1	2σ			U-Pb	LA-ICP-MS							intrusive	diorite to monzodiorite porphyry
Rabiee et al. 2019	UDMA	Siah-Kamar	MN31	37.3871	47.6016	30.4	1.2	2σ			U-Pb	LA-ICP-MS							extrusive	andesitoid/basaltoid
Rabiee et al. 2019	UDMA	Siah-Kamar	MN01	37.413	47.5975	28.9	0.4	2σ			U-Pb	LA-ICP-MS							extrusive	rhyolitoid
Rabiee et al. 2019	UDMA	Siah-Kamar	MN19	37.3993	47.5889	28.3	0.4	2σ			U-Pb	LA-ICP-MS							extrusive	dacitoid
Rabiee et al. 2020	NW Iran	Mianeh-Hastroud	MN33	37.4018	47.5995	43.4	2.6	2σ			U-Pb	LA-ICP-MS							extrusive	trachyte
Rabiee et al. 2020	NW Iran	Mianeh-Hastroud	MN38	37.4153	47.598	38.8	1	2σ			U-Pb	LA-ICP-MS							extrusive	basaltic trachyandesite
Rabiee et al. 2020	NW Iran	Mianeh-Hastroud	MN09	37.4101	47.3751	44.3	0.6	2σ			U-Pb	LA-ICP-MS							intrusive	monzodiorite
Rabiee et al. 2020	NW Iran	Mianeh-Hastroud	MN10A	37.4269	47.4135	36.8	0.6	2σ			U-Pb	LA-ICP-MS							intrusive	granite
Rabiee et al. 2020	NW Iran	Mianeh-Hastroud	MN67	37.3933	47.4025	40.7	0.9	2σ			U-Pb	LA-ICP-MS							intrusive	syenite
Rabiee et al. 2020	NW Iran	Mianeh-Hastroud	MN45	37.5276	47.2028	30.2	0.4	2σ			U-Pb	LA-ICP-MS							intrusive	monzonite
Rabiee et al. 2020	NW Iran	Mianeh-Hastroud	MN76	37.5297	47.1768	28.4	0.9	2σ			U-Pb	LA-ICP-MS							intrusive	granite
Rabiee et al. 2020	NW Iran	Mianeh-Hastroud	MN05	37.4299	47.351	22.6	0.4	2σ			U-Pb	LA-ICP-MS							extrusive	rhyolite
Rabiee et al. 2020	NW Iran	Mianeh-Hastroud	MN35	37.3996	47.5881	5.9	0.2	2σ			U-Pb	LA-ICP-MS							extrusive	trachyandesite
Rabiee et al. 2020	NW Iran	Mianeh-Hastroud	MN39	37.4055	47.5539	28.2	0.8	2σ			U-Pb	LA-ICP-MS							extrusive	dacite
Rabiee et al. 2020	NW Iran	Mianeh-Hastroud	MN43	37.4202	47.5595	27	0.4	2σ			U-Pb	LA-ICP-MS							extrusive	andesite
Rabiee et al. 2020	NW Iran	Mianeh-Hastroud	MN44	37.4013	47.5721	26.2	0.5	2σ			U-Pb	LA-ICP-MS							extrusive	rhyolite
Simmonds 2019	NW Iran	Kighal		38.6158	46.7122	19.24	0.17	2σ			U-Pb	LA-ICP-MS							intrusive	quartz monzonite
Etemadi et al. 2020	Lut	Kuh-e-Shah	118N	32.4378	59.0633	38.9	0.6	2σ			U-Pb	LA-ICP-MS							extrusive	trachyandesite
Etemadi et al. 2020	Lut	Kuh-e-Shah	28E	32.4181	58.9114	38.6	0.5	2σ			U-Pb	LA-ICP-MS							extrusive	andesite
Javidi Moghaddam et al. 2020	Lut	Khur	D33	33.0717	58.4961	44.97	0.74	n.r.			U-Pb	TIMS							intrusive	diorite porphyry dike
Javidi Moghaddam et al. 2020	Lut	Khur	SH6	33.0653	58.3708	41.14	0.43	n.r.			U-Pb	TIMS							intrusive	monzonite porphyry
Javidi Moghaddam et al. 2020	Lut	Khur	D4	33.0761	58.4875	40.86	0.44	n.r.			U-Pb	TIMS							intrusive	granodiorite porphyry dike
Mazhari et al. 2020	SSZ	Pasveh	PD6	36.5	45	40.86	0.67	2σ			U-Pb	LA-ICP-MS							intrusive	mesocratic monzodiorite
Mazhari et al. 2020	SSZ	Pasveh	PD2	36.5	45	40.64	0.22	2σ			U-Pb	LA-ICP-MS							intrusive	mesocratic granodiorite
Mazhari et al. 2020	SSZ	Pasveh	PD3	36.5	45	40.27	0.71	2σ			U-Pb	LA-ICP-MS							intrusive	mafic microgranular enclave
Mazhari et al. 2020	SSZ	Pasveh	PD4	36.5	45	40.58	0.27	2σ			U-Pb	LA-ICP-MS							intrusive	gabbroic enclave
Mazhari et al. 2020	SSZ	Pasveh	PD1	36.5	45	39.91	0.37	2σ			U-Pb	LA-ICP-MS							intrusive	felsic monzogranite
Mazhari et al. 2020	SSZ	Pasveh	PD5	36.5	45	36.57	0.55	2σ			U-Pb	LA-ICP-MS							intrusive	leucogranite dike
Maleki et al. 2019	Central UDMA	Khak-Sorkh	S1	31.7	53.5	29.94	0.09	2σ			U-Pb	ID-TIMS							intrusive	granite
Maleki et al. 2019	Central UDMA	Khak-Sorkh	S7	31.7	53.5	30.05	0.06	2σ			U-Pb	ID-TIMS							intrusive	granite
Maleki et al. 2019	Central UDMA	Khak-Sorkh	S5	31.7	53.5	31.23	0.16	2σ			U-Pb	ID-TIMS							intrusive	granodiorite
Maleki et al. 2019	Central UDMA	Khak-Sorkh	KS16	31.7	53.5	29.53	0.11	2σ			U-Pb	ID-TIMS							intrusive	epidote rich zone in skarn
Sepidbar et al. 2019	Alborz	Lavasan	A-6	35.88	51.63	41.4	0.5	n.r.			U-Pb	LA-ICP-MS							intrusive	monzonite
Sepidbar et al. 2019	Alborz	Karaj	A-10-1	35.98	50.93	37.6	0.6	n.r.			U-Pb	LA-ICP-MS							intrusive	monzogabbro
Sepidbar et al. 2019	Alborz	Karaj	A-10-1	35.96	50.81	51.9	1.2	n.r.			U-Pb	LA-ICP-MS							extrusive	dacite
Sepidbar et al. 2019	Alborz	Qazvin	A-15	36.27	50.21	42.3	0.5	n.r.			U-Pb	LA-ICP-MS							intrusive	monzonite
Sepidbar et al. 2019	Alborz	Qazvin	A-13	36.19	50.23	42	0.6	n.r.			U-Pb	LA-ICP-MS							intrusive	syenite
Sepidbar et al. 2019	Alborz	Mobarak Abad	A-2-1	35.82	51.76	40.6	0.4	n.r.			U-Pb	LA-ICP-MS							intrusive	monzogabbro
Shafaii Moghadam et al. 2020	NE Iran	Ghasem Abad	AR12-144GC			102.8	1.2	n.r.			U-Pb	LA-ICP-MS							intrusive	diorite
Shafaii Moghadam et al. 2020	NE Iran	Ghasem Abad	AR12-83GC			96.6	0.8	n.r.			U-Pb	LA-ICP-MS							intrusive	diorite
Shafaii Moghadam et al. 2020	NE Iran	Ghasem Abad	AR12-83GC			104	1.4	n.r.			U-Pb	LA-ICP-MS							intrusive	diorite
Shafaii Moghadam et al. 2020	NE Iran	Ghasem Abad	AR12-283GC			29.4	0.2	n.r.			U-Pb	LA-ICP-MS							intrusive	intermediate dike
Shafaii Moghadam et al. 2020	NE Iran	Paybaz	AR12-270-PC			65.8	0.9	n.r.			U-Pb	LA-ICP-MS							intrusive	granodiorite
Shafaii Moghadam et al. 2020	NE Iran	Paybaz	AR11-59PC			58.5	0.9	n.r.			U-Pb	LA-ICP-MS							intrusive	hornblendite
Shafaii Moghadam et al. 2020	NE Iran	Paybaz	AR11-54PC			48	0.6	n.r.			U-Pb	LA-ICP-MS							intrusive	gabbro
Shafaii Moghadam et al. 2020	NE Iran	Paybaz	AR11-17PC			62.4	0.6	n.r.			U-Pb	LA-ICP-MS							intrusive	granite
Shafaii Moghadam et al. 2020	NE Iran	Mashkan	MC12-2Mashkan			24.4	0.3	n.r.			U-Pb	SIMS							extrusive	dacitic lava
Shafaii Moghadam et al. 2020	NE Iran	Ghasem Abad	AR12-143GC			92.1	1.2	n.r.			U-Pb	SIMS							intrusive	diorite
Shafaii Moghadam et al. 2020	NE Iran	Ghasem Abad	AR12-125GC			44.3	0.4	n.r.			U-Pb	SIMS							extrusive	andesitic lava
Shafaii Moghadam et al. 2020	NE Iran	Ghasem Abad	AR12-131GC			44.1	0.4	n.r.			U-Pb	SIMS							extrusive	andesitic lava
Shafaii Moghadam et al. 2020	NE Iran	Paybaz	AR11-52PC			47	0.5	n.r.			U-Pb	SIMS							intrusive	gabbro
Javidi Moghaddam et al. 2019	Lut	Cheshmeh Khuri	CH20	33.22	58.4081	43.7	0.5	n.r.			U-Pb	LA-ICP-MS							intrusive	diorite
Almasi et al. 2019	NE Iran	Nay	BP11	35.32	58.77	40.2	0.3	2σ			U-Pb	LA-ICP-MS							intrusive	granitoid
Khaksar et al. 2020	UDMA	Kashan	Jh.5	33.7691	51.6035	35.2	0.71	1σ			U-Pb	LA-ICP-MS							intrusive	microdiorite
Khaksar et al. 2020	UDMA	Kashan	Jv.2	33.7386	51.453	18.9	0.84	1σ			U-Pb	LA-ICP-MS							intrusive	tonalite
Khaksar et al. 2020	UDMA	Kashan	Gh.49	33.6958	51.3498	19.26	0.83	1σ			U-Pb	LA-ICP-MS							intrusive	granodiorite
Khaksar et al. 2020	UDMA	Kashan	G2.19	33.9283	51.3447	17.3	1.8	1σ			U-Pb	LA-ICP-MS							intrusive	monzodiorite
Khaksar et al. 2020	UDMA	Kashan	Jv.25	33.7826	51.4231	19.3	1.2	1σ			U-Pb	LA-ICP-MS							intrusive	granite
