# Supplementary material for: Exploring a link between the Middle Eocene Climatic Optimum and Neotethys continental arc flare-up
Source: Copernicus journal article supplement (doi:10.5194/cp-17-229-2021), 2021-01-18
Supplement: Supplementary file 22 [file S30_VU107-A5_2.xls]

## Sheet: Summary Table
	Relative Abundances			36Ar [fA]	%1s	37Ar [fA]	%1s	38Ar [fA]	%1s	39Ar [fA]	%1s	40Ar [fA]	%1s	40(r)/39(k)	± 2s	Age	± 2s	40Ar(r)	39Ar(k)	K/Ca	± 2s		Procedure Blanks		36Ar [fA]	1s	37Ar [fA]	1s	38Ar [fA]	1s	39Ar [fA]	1s	40Ar [fA]	1s		Sample Parameters		Sample	Material	Location	Analyst	Standard	%1s	J	%1s	MDF	%1s	Volume Ratio	Sensitivity
																(Ma)		(%)	(%)																							(in Ma)							(mol/volt)
	103_VU107-A5_2	12		1.10673	0.447363	24.7684	0.917353	0.262229	0.419344	4.4728	0.283005	350.973	0.0571198	5.04862	0.687517	43.6311	5.87139	6.40998	2.255	0.0773621	0.00148587		103_VU107-A5_2	12	0.0065446	5.4e-05	0.012881	0.000133	0.0061135	0.000105	0.239097	0.006187	2.18621	0.0046043		103_VU107-A5_2	12	103_VU107-A5_2	IR216	plagioclase	Klaudia Kuiper	28.201	0.08	0.0047753	0.1	0.985339	0.1	1	1e-13
	104_VU107-A5_2	16	4	0.560943	0.438384	77.8728	0.825093	0.297423	0.285588	16.3467	0.173737	236.211	0.0563548	4.59426	0.0955533	39.7467	0.817758	31.692	8.24562	0.089974	0.00151752		104_VU107-A5_2	16	0.0065446	5.4e-05	0.012881	0.000133	0.0061135	0.000105	0.239097	0.006187	2.18621	0.0046043		104_VU107-A5_2	16	104_VU107-A5_2	IR216	plagioclase	Klaudia Kuiper	28.201	0.08	0.0047753	0.1	0.985339	0.1	1	1e-13
	105_VU107-A5_2	20	4	0.144719	0.591879	87.8505	0.80911	0.258291	0.334072	19.8336	0.164376	127.597	0.0641877	4.61688	0.0321905	39.9404	0.275462	71.551	10.0068	0.0967899	0.00159847		105_VU107-A5_2	20	0.0065446	5.4e-05	0.012881	0.000133	0.0061135	0.000105	0.239097	0.006187	2.18621	0.0046043		105_VU107-A5_2	20	105_VU107-A5_2	IR216	plagioclase	Klaudia Kuiper	28.201	0.08	0.0047753	0.1	0.985339	0.1	1	1e-13
	107_VU107-A5_2	24	4	0.0469828	0.85418	80.0246	0.813567	0.233054	0.353343	19.2394	0.169201	96.0985	0.0710092	4.60566	0.0223159	39.8444	0.190972	91.9498	9.70875	0.103091	0.00171353		107_VU107-A5_2	24	0.0065446	5.4e-05	0.012881	0.000133	0.0061135	0.000105	0.239097	0.006187	2.18621	0.0046043		107_VU107-A5_2	24	107_VU107-A5_2	IR216	plagioclase	Klaudia Kuiper	28.201	0.08	0.0047753	0.1	0.985339	0.1	1	1e-13
	108_VU107-A5_2	28	4	0.0433532	1.17043	97.2471	0.797756	0.273645	0.368638	22.8317	0.179629	110.176	0.0685019	4.60672	0.0233304	39.8534	0.199653	95.1912	11.5208	0.100666	0.00164659		108_VU107-A5_2	28	0.0065446	5.4e-05	0.012881	0.000133	0.0061135	0.000105	0.239097	0.006187	2.18621	0.0046043		108_VU107-A5_2	28	108_VU107-A5_2	IR216	plagioclase	Klaudia Kuiper	28.201	0.08	0.0047753	0.1	0.985339	0.1	1	1e-13
	109_VU107-A5_2	32	4	0.0409407	0.658509	86.9382	0.796089	0.24472	0.315703	20.3575	0.168355	99.0806	0.0600206	4.61562	0.0197002	39.9295	0.16858	94.5617	10.2722	0.1004	0.00163411		109_VU107-A5_2	32	0.0065446	5.4e-05	0.012881	0.000133	0.0061135	0.000105	0.239097	0.006187	2.18621	0.0046043		109_VU107-A5_2	32	109_VU107-A5_2	IR216	plagioclase	Klaudia Kuiper	28.201	0.08	0.0047753	0.1	0.985339	0.1	1	1e-13
	111_VU107-A5_2	37	4	0.0329454	0.996775	87.6508	0.86803	0.241119	0.407642	20.1747	0.293433	95.6774	0.224981	4.60995	0.0366654	39.8811	0.313765	96.9221	10.1794	0.0986842	0.00180901		111_VU107-A5_2	37	0.0065446	5.4e-05	0.012881	0.000133	0.0061135	0.000105	0.239097	0.006187	2.18621	0.0046043		111_VU107-A5_2	37	111_VU107-A5_2	IR216	plagioclase	Klaudia Kuiper	28.201	0.08	0.0047753	0.1	0.985339	0.1	1	1e-13
	113_VU107-A5_2	50	4	0.0491644	0.7495	131.28	0.786251	0.347976	0.284481	29.0155	0.170183	137.908	0.0710413	4.61685	0.0201241	39.9401	0.172206	96.8414	14.6384	0.0947494	0.00152466		113_VU107-A5_2	50	0.0065446	5.4e-05	0.012881	0.000133	0.0061135	0.000105	0.239097	0.006187	2.18621	0.0046043		113_VU107-A5_2	50	113_VU107-A5_2	IR216	plagioclase	Klaudia Kuiper	28.201	0.08	0.0047753	0.1	0.985339	0.1	1	1e-13
	115_VU107-A5_2	70	4	0.0305851	0.724281	77.4513	0.796025	0.204531	0.364696	17.0973	0.168042	81.6606	0.0804874	4.61238	0.020377	39.9019	0.174374	96.2755	8.62564	0.094633	0.00154002		115_VU107-A5_2	70	0.0065446	5.4e-05	0.012881	0.000133	0.0061135	0.000105	0.239097	0.006187	2.18621	0.0046043		115_VU107-A5_2	70	115_VU107-A5_2	IR216	plagioclase	Klaudia Kuiper	28.201	0.08	0.0047753	0.1	0.985339	0.1	1	1e-13
	117_VU107-A5_2	16		0.0539826	0.889282	133.857	0.795777	0.349098	0.268075	28.8373	0.158604	137.188	0.0519041	4.57773	0.0198141	39.6053	0.169585	95.9245	14.5474	0.0923473	0.00149885		117_VU107-A5_2	16	0.0065446	5.4e-05	0.012881	0.000133	0.0061135	0.000105	0.239097	0.006187	2.18621	0.0046043		117_VU107-A5_2	16	117_VU107-A5_2	IR216	plagioclase	Klaudia Kuiper	28.201	0.08	0.0047753	0.1	0.985339	0.1	1	1e-13
			S	2.11034	0.269342	884.94	0.26821	2.71209	0.106522	198.207	0.0613909	1472.57	0.0257543
	Information on Analysis and Constants Used in Calculations									Results		40(a)/36(a)	± 2s	40(r)/39(k)	± 2s	Age	± 2s	MSWD	39Ar(k)	K/Ca	± 2s
																(Ma)			(%,n)
	Sample = 103_VU107-A5_2				Age Equations = Min et al. (2000)					Age Plateau Overestimated Error				4.61208	0.00873107	39.8992	0.108688	0.162555	83.1976	0.0970375	0.00301467
	Material = IR216				Negative Intensities = Allowed										0.00189309		0.00272407	0.992288	8
	Location = plagioclase				Decay Constant 40K = 5.460 ± 0.053 E-10 1/a					Full External Error							0.835732	2.06904	2σ Confidence Limit
	Analyst = Klaudia Kuiper				Decay Constant 39Ar = 2.940 ± 0.016 E-07 1/h					Analytical Error							0.0747154	1	Error Magnification
	Project = VU107				Decay Constant 37Ar = 8.230 ± 0.012 E-04 1/h
	Mass Discrimination Law = LIN				Decay Constant 36Cl = 2.257 ± 0.015 E-06 1/a					Total Fusion Age				4.61557	0.0190498	39.9291	0.181146		10	0.0960209	0.000528479
	Irradiation = VU107				Decay Activity 40K(EC,β⁺) = 3.310 ± 0.030 1/gs										0.0041273		0.00453668
	J = 0.00477530 ± 0.00000478				Decay Activity 40K(β⁻) = 27.890 ± 0.150 1/gs					Full External Error							0.848804
	FCs = 28.201 ± 0.023 Ma				Atmospheric Ratio 40/36(a) = 298.56 ± 0.31					Analytical Error							0.163015
	IGSN = Undefined				Atmospheric Ratio 38/36(a) = 0.1885 ± 0.0003
	Preferred Age = Undefined				Production Ratio 39/37(ca) = 0.000673 ± 0.000004					Normal Isochron Overestimated Error		298.128	2.63722	4.61328	0.00953105	39.9095	0.113517	0.184452	83.1976
	Classification = Undefined				Production Ratio 36/37(ca) = 0.000264 ± 0.000002								0.00884595		0.00206601		0.00284436	0.981242	8
	Experiment Type = Undefined				Production Ratio 40/39(k) = 0.000860 ± 0.000070					Full External Error							0.836583	2.1547	2σ Confidence Limit
	Extraction Method = Undefined				Production Ratio 38/39(k) = 0.012110 ± 0.000030					Analytical Error							0.0815608	1	Error Magnification
	Heating = 720 sec				Production Ratio 36/38(cl) = 262.80 ± 1.71												1		Number of Iterations
	Isolation = 18.00 min				Scaling Ratio K/Ca = 0.430												5.21895e-06		Convergence
	Instrument = HELIX				Abundance Ratio 40K/K = 1.1700 ± 0.0100 E-04
	Lithology = Undefined				Atomic Weight K = 39.0983 ± 0.0001 g					Inverse Isochron Overestimated Error		298.212	2.63774	4.61259	0.00953996	39.9037	0.113564	0.179444	83.1976
	Lat-Lon = Undefined - Undefined												0.0088452		0.00206824		0.00284595	0.982538	8
	Feature = Undefined									Full External Error							0.83647	2.1547	2σ Confidence Limit
										Analytical Error							0.0816373	1	Error Magnification
																	2		Number of Iterations
																	1.95459e-05		Convergence
																	0.651748		Spreading Factor
[truncated: 39 more columns]

## Sheet: Hidden Data
Double Line Plot Age Plateau			Double Line Plot K/Ca Plateau			X-Y Plot Normal Isochron		X-Y Plot Inverse Isochron		Error Ellipses Normal Isochron		Error Ellipses Inverse Isochron
Ar39k%	Line 1	Line 2	Ar39k%	Line 1	Line 2	X-axis	Y-axis	X-axis	Y-axis	X-axis	Y-axis	X-axis	Y-axis
0	37.7597	49.5025	0	0.0758763	0.078848	4.05033	319.009	0.0126966	0.00313471	4.08651	321.903	0.0127702	0.00313554
2.255	37.7597	49.5025	2.255	0.0758763	0.078848	30.1531	437.091	0.0689858	0.00228785	4.09135	321.804	0.0127678	0.00312815
2.255	40.5645	38.929	2.255	0.0914916	0.0884565	162.718	1049.81	0.154997	0.000952554	4.09339	321.515	0.0127605	0.00312121
10.5006	40.5645	38.929	10.5006	0.0914916	0.0884565	742.008	3716	0.199679	0.000269107	4.0925	321.055	0.0127489	0.00311519
10.5006	39.6649	40.2158	10.5006	0.0951914	0.0983884	1287.69	6230.57	0.206672	0.000160499	4.08874	320.456	0.0127337	0.0031105
20.5074	39.6649	40.2158	20.5074	0.0951914	0.0983884	1128.41	5506.86	0.20491	0.000181592	4.08236	319.757	0.012716	0.00310746
20.5074	40.0353	39.6534	20.5074	0.104804	0.101377	2051.47	9755.72	0.210283	0.000102504	4.0738	319.008	0.012697	0.00310628
30.2162	40.0353	39.6534	30.2162	0.104804	0.101377	1994.08	9504.9	0.209794	0.000105209	4.06364	318.259	0.0126779	0.00310703
30.2162	39.6537	40.053	30.2162	0.0990197	0.102313	1681.32	8053.46	0.20877	0.00012417	4.05257	317.561	0.0126601	0.00310967
41.7369	39.6537	40.053	41.7369	0.0990197	0.102313	1541.88	7356.85	0.209584	0.000135928	4.04135	316.962	0.0126448	0.00311402
41.7369	40.0981	39.7609	41.7369	0.102034	0.0987655					4.03074	316.502	0.0126331	0.00311978
52.0091	40.0981	39.7609	52.0091	0.102034	0.0987655					4.02147	316.213	0.0126256	0.00312655
52.0091	39.5673	40.1948	52.0091	0.0968752	0.100493					4.01416	316.114	0.012623	0.00313388
62.1886	39.5673	40.1948	62.1886	0.0968752	0.100493					4.00932	316.213	0.0126255	0.00314127
62.1886	40.1123	39.7679	62.1886	0.096274	0.0932247					4.00728	316.502	0.0126327	0.00314821
76.827	40.1123	39.7679	76.827	0.096274	0.0932247					4.00817	316.962	0.0126444	0.00315423
76.827	39.7275	40.0762	76.827	0.093093	0.096173					4.01193	317.562	0.0126596	0.00315892
85.4526	39.7275	40.0762	85.4526	0.093093	0.096173					4.01831	318.26	0.0126773	0.00316196
85.4526	39.7749	39.4357	85.4526	0.0938461	0.0908484					4.02687	319.009	0.0126963	0.00316314
100	39.7749	39.4357	100	0.0938461	0.0908484					4.03703	319.758	0.0127154	0.00316239
										4.0481	320.456	0.0127331	0.00315975
										4.05932	321.056	0.0127484	0.0031554
										4.06993	321.516	0.0127602	0.00314965
										4.0792	321.805	0.0127676	0.00314287
										4.08651	321.903	0.0127702	0.00313554
										30.4267	441.114	0.0692386	0.00228865
										30.4458	440.975	0.06923	0.00228318
										30.445	440.572	0.0692047	0.00227802
										30.4242	439.931	0.0691646	0.00227354
										30.385	439.096	0.0691122	0.00227003
										30.33	438.125	0.0690513	0.00226773
										30.263	437.083	0.0689859	0.00226681
										30.1884	436.042	0.0689204	0.00226732
										30.1114	435.073	0.0688595	0.00226923
										30.0373	434.241	0.0688071	0.00227241
										29.9711	433.603	0.0687669	0.00227664
										29.9172	433.203	0.0687416	0.00228164
										29.8795	433.067	0.068733	0.00228705
										29.8603	433.206	0.0687416	0.00229253
										29.8612	433.61	0.0687669	0.00229768
										29.8819	434.251	0.068807	0.00230217
										29.9211	435.086	0.0688593	0.00230568
										29.9761	436.057	0.0689203	0.00230797
										30.0432	437.098	0.0689857	0.0023089
										30.1177	438.139	0.0690512	0.00230839
										30.1947	439.109	0.0691121	0.00230648
										30.2688	439.941	0.0691645	0.0023033
										30.3351	440.579	0.0692047	0.00229907
										30.3889	440.979	0.0692299	0.00229407
										30.4267	441.114	0.0692386	0.00228865
										165.093	1065.23	0.155546	0.000952998
										165.158	1064.69	0.155527	0.000949363
										165.056	1063.12	0.155473	0.000945945
										164.795	1060.65	0.155385	0.000942977
										164.393	1057.45	0.155272	0.000940662
										163.876	1053.72	0.155139	0.000939157
										163.28	1049.72	0.154997	0.000938566
										162.646	1045.73	0.154856	0.000938927
										162.017	1042.02	0.154723	0.000940218
										161.435	1038.84	0.15461	0.000942349
										160.941	1036.41	0.154522	0.000945175
										160.569	1034.89	0.154468	0.000948505
										160.342	1034.38	0.154449	0.00095211
										160.278	1034.93	0.154468	0.000955746
										160.379	1036.49	0.154522	0.000959164
										160.64	1038.96	0.15461	0.000962131
										161.043	1042.17	0.154723	0.000964446
										161.56	1045.9	0.154855	0.000965951
										162.156	1049.9	0.154997	0.000966543
										162.79	1053.88	0.155139	0.000966181
										163.419	1057.6	0.155272	0.000964891
										164	1060.78	0.155385	0.00096276
										164.494	1063.21	0.155473	0.000959933
										164.867	1064.73	0.155527	0.000956604
										165.093	1065.23	0.155546	0.000952998
										768.228	3847.47	0.200414	0.000269254
										768.014	3842.85	0.200389	0.000266785
										766.028	3829.59	0.200316	0.000264475
										762.405	3808.59	0.200199	0.00026248
										757.392	3781.28	0.200047	0.000260936
										751.33	3749.52	0.199869	0.000259949
										744.633	3715.47	0.199679	0.000259587
										737.757	3681.46	0.199489	0.000259873
										731.171	3649.81	0.199312	0.000260788
										725.323	3622.66	0.19916	0.000262271
										720.612	3601.88	0.199043	0.000264219
										717.36	3588.87	0.19897	0.0002665
										715.787	3584.53	0.198945	0.000268959
										716.001	3589.14	0.19897	0.000271428
										717.987	3602.4	0.199043	0.000273739
										721.61	3623.4	0.19916	0.000275734
										726.624	3650.72	0.199312	0.000277277
										732.685	3682.48	0.199489	0.000278264
										739.382	3716.52	0.199679	0.000278627
										746.258	3750.53	0.199869	0.00027834
										752.844	3782.19	0.200047	0.000277425
										758.692	3809.33	0.200199	0.000275943
										763.403	3830.12	0.200316	0.000273995
										766.656	3843.13	0.200389	0.000271713
										768.228	3847.47	0.200414	0.000269254
										1370.9	6633.34	0.207469	0.000160577
										1369.3	6619.36	0.207442	0.000157889
										1362.13	6578.89	0.207362	0.000155379
										1349.9	6514.68	0.207236	0.000153218
										1333.42	6431.1	0.207071	0.000151553
										1313.82	6333.86	0.206879	0.000150498
										1292.45	6229.59	0.206672	0.000150124
										1270.75	6125.37	0.206466	0.000150457
										1250.2	6028.33	0.206274	0.000151475
										1232.21	5945.07	0.206109	0.000153107
										1218	5881.27	0.205982	0.000155244
										1208.54	5841.27	0.205903	0.000157738
										1204.47	5827.8	0.205876	0.000160421
										1206.07	5841.78	0.205903	0.000163109
										1213.24	5882.25	0.205982	0.000165619
										1225.48	5946.46	0.206109	0.00016778
										1241.96	6030.04	0.206274	0.000169445
										1261.55	6127.27	0.206466	0.0001705
										1282.93	6231.55	0.206672	0.000170874
										1304.63	6335.76	0.206879	0.000170541
										1325.17	6432.81	0.207071	0.000169523
										1343.16	6516.07	0.207236	0.000167891
										1357.37	6579.87	0.207362	0.000165754
										1366.84	6619.87	0.207442	0.00016326
										1370.9	6633.34	0.207469	0.000160577
										1173.23	5725.7	0.205644	0.000181665
										1172.7	5718.04	0.205619	0.000179794
										1169.16	5695.99	0.205546	0.000178047
										1162.84	5661.04	0.205429	0.000176541
										1154.18	5615.6	0.205277	0.000175379
										1143.76	5562.74	0.2051	0.00017464
										1132.29	5506.07	0.20491	0.000174376
										1120.56	5449.46	0.20472	0.000174603
										1109.36	5396.76	0.204542	0.000175306
										1099.46	5351.56	0.20439	0.000176437
										1091.54	5316.95	0.204274	0.00017792
										1086.13	5295.28	0.2042	0.000179653
										1083.59	5288.03	0.204175	0.000181518
										1084.12	5295.69	0.2042	0.000183389
										1087.66	5317.74	0.204274	0.000185136
										1093.98	5352.68	0.20439	0.000186642
										1102.64	5398.13	0.204542	0.000187804
										1113.06	5450.99	0.20472	0.000188543
										1124.53	5507.66	0.20491	0.000188808
										1136.26	5564.27	0.2051	0.000188581
										1147.46	5616.97	0.205277	0.000187877
										1157.35	5662.17	0.205429	0.000186746
										1165.28	5696.78	0.205546	0.000185263
										1170.69	5718.45	0.205619	0.00018353
										1173.23	5725.7	0.205644	0.000181665
										2223.86	10577.6	0.211841	0.000102784
										2221.75	10548.8	0.211788	0.000100541
										2208.04	10466	0.211633	9.8431e-05
										2183.66	10334.7	0.211385	9.65989e-05
										2150.26	10164	0.211062	9.51693e-05
										2110.14	9965.5	0.210687	9.42394e-05
										2066.02	9752.67	0.210283	9.38728e-05
										2020.9	9540.06	0.20988	9.40944e-05
										1977.87	9342.14	0.209504	9.48891e-05
										1939.86	9172.41	0.209182	9.62027e-05
										1909.45	9042.43	0.208934	9.79457e-05
										1888.71	8961.06	0.208778	9.99994e-05
										1879.07	8933.84	0.208725	0.000102224
										1881.18	8962.64	0.208778	0.000104467
										1894.89	9045.48	0.208934	0.000106577
										1919.28	9176.72	0.209182	0.000108409
										1952.67	9347.43	0.209504	0.000109839
										1992.79	9545.95	0.20988	0.000110768
										2036.91	9758.78	0.210283	0.000111135
										2082.03	9971.39	0.210687	0.000110913
										2125.06	10169.3	0.211062	0.000110119
										2163.08	10339	0.211385	0.000108805
										2193.49	10469	0.211633	0.000107062
										2214.22	10550.4	0.211788	0.000105008
										2223.86	10577.6	0.211841	0.000102784
										2134.04	10172.3	0.21057	0.000105266
										2131.1	10149.1	0.210544	0.000103353
										2118.82	10082.1	0.210466	0.000101565
										2098.04	9975.74	0.210343	0.000100026
										2070.18	9837.29	0.210182	9.88406e-05
										2037.12	9676.2	0.209995	9.80888e-05
										2001.14	9503.42	0.209794	9.78223e-05
										1964.67	9330.75	0.209594	9.80591e-05
										1930.21	9169.95	0.209406	9.87831e-05
										1900.1	9031.97	0.209246	9.99451e-05
										1876.4	8926.23	0.209122	0.000101466
										1860.71	8859.91	0.209045	0.000103242
										1854.11	8837.56	0.209018	0.000105151
										1857.05	8860.68	0.209045	0.000107065
										1869.33	8927.71	0.209122	0.000108852
										1890.11	9034.07	0.209246	0.000110391
										1917.98	9172.51	0.209406	0.000111577
										1951.03	9333.61	0.209594	0.000112329
										1987.01	9506.39	0.209794	0.000112595
										2023.48	9679.06	0.209995	0.000112359
										2057.94	9839.86	0.210182	0.000111635
										2088.05	9977.84	0.210343	0.000110473
										2111.76	10083.6	0.210466	0.000108952
										2127.44	10149.9	0.210544	0.000107176
										2134.04	10172.3	0.21057	0.000105266
										1782.28	8537.34	0.20955	0.000124256
										1780.4	8520.52	0.209524	0.000122323
										1771.77	8471.88	0.209446	0.000120515
										1756.97	8394.72	0.209322	0.000118956
										1737.02	8294.31	0.20916	0.000117753
										1713.27	8177.49	0.208972	0.000116987
										1687.34	8052.21	0.20877	0.00011671
										1661.01	7927.02	0.208568	0.000116942
										1636.05	7810.44	0.20838	0.000117667
										1614.19	7710.43	0.208218	0.000118834
										1596.9	7633.79	0.208095	0.000120366
										1585.36	7585.75	0.208017	0.000122156
										1580.36	7569.59	0.20799	0.000124084
										1582.24	7586.41	0.208017	0.000126018
										1590.88	7635.05	0.208095	0.000127826
										1605.67	7712.2	0.208218	0.000129384
										1625.63	7812.62	0.20838	0.000130588
										1649.38	7929.44	0.208568	0.000131354
										1675.3	8054.72	0.20877	0.00013163
										1701.64	8179.91	0.208972	0.000131398
										1726.59	8296.49	0.20916	0.000130674
										1748.46	8396.5	0.209322	0.000129506
										1765.75	8473.14	0.209446	0.000127975
										1777.29	8521.17	0.209524	0.000126184
										1782.28	8537.34	0.20955	0.000124256
										1641.21	7830.87	0.210285	0.000135971
										1639.1	7814.45	0.210261	0.000133703
										1630.37	7766.85	0.210191	0.000131587
										1615.61	7691.3	0.21008	0.000129766
										1595.82	7592.97	0.209934	0.000128365
										1572.36	7478.54	0.209765	0.000127479
										1546.82	7355.82	0.209584	0.00012717
										1520.94	7233.17	0.209402	0.000127457
										1496.49	7118.95	0.209233	0.000128321
										1475.13	7020.94	0.209088	0.000129704
										1458.32	6945.82	0.208976	0.000131511
										1447.21	6898.72	0.208906	0.000133619
										1442.54	6882.84	0.208882	0.000135884
										1444.65	6899.26	0.208906	0.000138152
										1453.38	6946.86	0.208976	0.000140269
										1468.14	7022.4	0.209088	0.00014209
										1487.93	7120.74	0.209233	0.00014349
										1511.39	7235.17	0.209402	0.000144376
										1536.93	7357.89	0.209584	0.000144686
										1562.81	7480.54	0.209765	0.000144399
										1587.26	7594.76	0.209934	0.000143534
										1608.62	7692.77	0.21008	0.000142152
										1625.43	7767.88	0.210191	0.000140345
										1636.54	7814.99	0.210261	0.000138237
										1641.21	7830.87	0.210285	0.000135971
