# Supplementary material for: Exploring a link between the Middle Eocene Climatic Optimum and Neotethys continental arc flare-up
Source: Copernicus journal article supplement (doi:10.5194/cp-17-229-2021), 2021-01-18
Supplement: Supplementary file 23 [file S31_VU107-A6_1.xls]

## Sheet: Summary Table
	Relative Abundances			36Ar [fA]	%1s	37Ar [fA]	%1s	38Ar [fA]	%1s	39Ar [fA]	%1s	40Ar [fA]	%1s	40(r)/39(k)	± 2s	Age	± 2s	40Ar(r)	39Ar(k)	K/Ca	± 2s		Procedure Blanks		36Ar [fA]	1s	37Ar [fA]	1s	38Ar [fA]	1s	39Ar [fA]	1s	40Ar [fA]	1s		Sample Parameters		Sample	Material	Location	Analyst	Standard	%1s	J	%1s	MDF	%1s	Volume Ratio	Sensitivity
																(Ma)		(%)	(%)																							(in Ma)							(mol/volt)
	069_VU107-A6	10		0.016614	1.81731	0.168032	14.8851	0.0216175	1.02117	1.57154	0.144365	15.2764	0.0629758	6.57239	0.117141	56.5981	0.993321	67.6077	0.595201	4.02134	1.19722		069_VU107-A6	10	0.008471	7.81e-05	0.0125497	0.000135	0.0056612	8.84e-05	0.0106243	0.0002027	2.4832	0.0036195		069_VU107-A6	10	069_VU107-A6	groundmass	IR216	Klaudia Kuiper	28.201	0.08	0.0047753	0.1	0.986385	0.1	1	1e-13
	070_VU107-A6	11.3		0.0285774	0.913735	0.389246	7.50422	0.0454691	0.706713	3.40886	0.11693	28.8154	0.0510641	5.95876	0.0488875	51.3872	0.415734	70.4868	1.29106	3.76548	0.565209		070_VU107-A6	11.3	0.008471	7.81e-05	0.0125497	0.000135	0.0056612	8.84e-05	0.0106243	0.0002027	2.4832	0.0036195		070_VU107-A6	11.3	070_VU107-A6	groundmass	IR216	Klaudia Kuiper	28.201	0.08	0.0047753	0.1	0.986385	0.1	1	1e-13
	071_VU107-A6	12.5		0.0209842	0.903184	0.717062	3.48355	0.0748788	0.453804	6.04057	0.129694	36.4546	0.0508883	5.0067	0.0237171	43.2731	0.202583	82.9549	2.28777	3.62205	0.252527		071_VU107-A6	12.5	0.008471	7.81e-05	0.0125497	0.000135	0.0056612	8.84e-05	0.0106243	0.0002027	2.4832	0.0036195		071_VU107-A6	12.5	071_VU107-A6	groundmass	IR216	Klaudia Kuiper	28.201	0.08	0.0047753	0.1	0.986385	0.1	1	1e-13
	072_VU107-A6	13.7	4	0.0111465	2.05328	0.801238	4.34683	0.0775137	0.494041	6.38569	0.111207	33.8206	0.0475759	4.7846	0.0244676	41.375	0.209211	90.3307	2.41847	3.42672	0.298005		072_VU107-A6	13.7	0.008471	7.81e-05	0.0125497	0.000135	0.0056612	8.84e-05	0.0106243	0.0002027	2.4832	0.0036195		072_VU107-A6	13.7	072_VU107-A6	groundmass	IR216	Klaudia Kuiper	28.201	0.08	0.0047753	0.1	0.986385	0.1	1	1e-13
	074_VU107-A6	15	4	0.00544622	3.03025	1.25614	2.20267	0.131997	0.370671	10.9527	0.10726	53.769	0.0434465	4.76929	0.0142875	41.2441	0.122174	97.1425	4.14818	3.74903	0.165353		074_VU107-A6	15	0.0085847	0.0001088	0.0126386	0.0001555	0.0058736	6.25e-05	0.0152971	0.0001967	2.48307	0.0036635		074_VU107-A6	15	074_VU107-A6	groundmass	IR216	Klaudia Kuiper	28.201	0.08	0.0047753	0.1	0.986385	0.1	1	1e-13
	075_VU107-A6	16	4	0.00195049	8.86459	1.28803	2.46493	0.137579	0.372062	11.5301	0.108656	55.4463	0.0393256	4.76663	0.0142141	41.2213	0.121548	99.1149	4.36686	3.84896	0.189933		075_VU107-A6	16	0.0085847	0.0001088	0.0126386	0.0001555	0.0058736	6.25e-05	0.0152971	0.0001967	2.48307	0.0036635		075_VU107-A6	16	075_VU107-A6	groundmass	IR216	Klaudia Kuiper	28.201	0.08	0.0047753	0.1	0.986385	0.1	1	1e-13
	076_VU107-A6	17	4	0.00111304	15.0679	1.36446	2.35814	0.15212	0.335514	12.7856	0.10549	61.2339	0.0385152	4.77121	0.0132856	41.2605	0.113606	99.615	4.84237	4.029	0.190209		076_VU107-A6	17	0.0085847	0.0001088	0.0126386	0.0001555	0.0058736	6.25e-05	0.0152971	0.0001967	2.48307	0.0036635		076_VU107-A6	17	076_VU107-A6	groundmass	IR216	Klaudia Kuiper	28.201	0.08	0.0047753	0.1	0.986385	0.1	1	1e-13
	077_VU107-A6	18	4	0.00102727	19.1138	1.52843	2.41101	0.169677	0.341918	14.2383	0.108318	68.3784	0.0407994	4.78884	0.0138209	41.4113	0.118174	99.7097	5.39256	4.00543	0.193337		077_VU107-A6	18	0.0085847	0.0001088	0.0126386	0.0001555	0.0058736	6.25e-05	0.0152971	0.0001967	2.48307	0.0036635		077_VU107-A6	18	077_VU107-A6	groundmass	IR216	Klaudia Kuiper	28.201	0.08	0.0047753	0.1	0.986385	0.1	1	1e-13
	079_VU107-A6	19	4	0.00132401	10.8948	1.49879	2.29509	0.180175	0.453448	15.1679	0.107548	72.848	0.042624	4.78397	0.012453	41.3696	0.10648	99.6016	5.74467	4.35134	0.199953		079_VU107-A6	19	0.0081637	0.0001021	0.0129941	0.0001365	0.0057007	0.0001035	0.0171255	0.0002094	2.42508	0.0038368		079_VU107-A6	19	079_VU107-A6	groundmass	IR216	Klaudia Kuiper	28.201	0.08	0.0047753	0.1	0.986385	0.1	1	1e-13
	080_VU107-A6	20	4	0.00138503	11.6017	1.44262	2.12223	0.161505	0.428793	13.5898	0.106578	65.2465	0.0418636	4.77857	0.0130362	41.3234	0.111469	99.5226	5.14696	4.05038	0.172134		080_VU107-A6	20	0.0081637	0.0001021	0.0129941	0.0001365	0.0057007	0.0001035	0.0171255	0.0002094	2.42508	0.0038368		080_VU107-A6	20	080_VU107-A6	groundmass	IR216	Klaudia Kuiper	28.201	0.08	0.0047753	0.1	0.986385	0.1	1	1e-13
	081_VU107-A6	21	4	0.00142046	16.7495	1.58972	1.88433	0.184496	0.274662	15.6368	0.130037	75.1168	0.0681476	4.7842	0.0167448	41.3716	0.143177	99.5843	5.92227	4.22928	0.159766		081_VU107-A6	21	0.0081637	0.0001021	0.0129941	0.0001365	0.0057007	0.0001035	0.0171255	0.0002094	2.42508	0.0038368		081_VU107-A6	21	081_VU107-A6	groundmass	IR216	Klaudia Kuiper	28.201	0.08	0.0047753	0.1	0.986385	0.1	1	1e-13
	082_VU107-A6	22	4	0.000908408	21.582	1.19483	2.47654	0.142523	0.426118	11.9711	0.105854	57.264	0.0405525	4.76819	0.0145876	41.2347	0.124741	99.6729	4.53393	4.30792	0.213569		082_VU107-A6	22	0.0081637	0.0001021	0.0129941	0.0001365	0.0057007	0.0001035	0.0171255	0.0002094	2.42508	0.0038368		082_VU107-A6	22	082_VU107-A6	groundmass	IR216	Klaudia Kuiper	28.201	0.08	0.0047753	0.1	0.986385	0.1	1	1e-13
	084_VU107-A6	23.5	4	0.00136864	14.7488	1.80324	2.13187	0.197941	0.348533	16.6335	0.110795	79.491	0.0404645	4.76244	0.0133801	41.1855	0.114419	99.6468	6.29972	3.96612	0.169333		084_VU107-A6	23.5	0.0082684	0.0001327	0.0124387	0.0001077	0.0057456	0.0001058	0.0273734	0.0001882	2.50164	0.00325		084_VU107-A6	23.5	084_VU107-A6	groundmass	IR216	Klaudia Kuiper	28.201	0.08	0.0047753	0.1	0.986385	0.1	1	1e-13
	085_VU107-A6	25	4	0.00124893	15.4593	1.98189	1.77044	0.215303	0.367043	18.0911	0.10948	86.3328	0.0367938	4.75962	0.0127163	41.1614	0.108743	99.731	6.85178	3.92484	0.13924		085_VU107-A6	25	0.0082684	0.0001327	0.0124387	0.0001077	0.0057456	0.0001058	0.0273734	0.0001882	2.50164	0.00325		085_VU107-A6	25	085_VU107-A6	groundmass	IR216	Klaudia Kuiper	28.201	0.08	0.0047753	0.1	0.986385	0.1	1	1e-13
	086_VU107-A6	27		0.0020831	9.52911	2.26073	1.75224	0.240815	0.397134	20.1925	0.115508	96.0845	0.0464819	4.73594	0.0131864	40.9589	0.112776	99.5201	7.64764	3.84041	0.134878		086_VU107-A6	27	0.0082684	0.0001327	0.0124387	0.0001077	0.0057456	0.0001058	0.0273734	0.0001882	2.50164	0.00325		086_VU107-A6	27	086_VU107-A6	groundmass	IR216	Klaudia Kuiper	28.201	0.08	0.0047753	0.1	0.986385	0.1	1	1e-13
	087_VU107-A6	29.5		0.00218843	8.42022	2.54121	1.23387	0.255868	0.336341	21.4253	0.105288	101.632	0.0335335	4.72194	0.0116393	40.8391	0.0995515	99.5361	8.1145	3.62509	0.0897827		087_VU107-A6	29.5	0.0082684	0.0001327	0.0124387	0.0001077	0.0057456	0.0001058	0.0273734	0.0001882	2.50164	0.00325		087_VU107-A6	29.5	087_VU107-A6	groundmass	IR216	Klaudia Kuiper	28.201	0.08	0.0047753	0.1	0.986385	0.1	1	1e-13
	089_VU107-A6	35		0.00244911	8.58074	2.85641	1.41182	0.28092	0.316649	23.399	0.110868	110.941	0.0398902	4.71917	0.0123573	40.8155	0.105694	99.5257	8.86198	3.52215	0.0997592		089_VU107-A6	35	0.008279	8.3e-05	0.012654	0.0001238	0.0059809	0.0001179	0.0358448	0.0002252	2.54338	0.0031073		089_VU107-A6	35	089_VU107-A6	groundmass	IR216	Klaudia Kuiper	28.201	0.08	0.0047753	0.1	0.986385	0.1	1	1e-13
	090_VU107-A6	50		0.00395321	5.83715	2.92145	1.58655	0.234292	0.391454	19.4705	0.106348	92.0271	0.0383683	4.67731	0.012745	40.4574	0.109031	98.9495	7.37399	2.86552	0.09113		090_VU107-A6	50	0.008279	8.3e-05	0.012654	0.0001238	0.0059809	0.0001179	0.0358448	0.0002252	2.54338	0.0031073		090_VU107-A6	50	090_VU107-A6	groundmass	IR216	Klaudia Kuiper	28.201	0.08	0.0047753	0.1	0.986385	0.1	1	1e-13
	091_VU107-A6	80		0.00276932	4.64364	2.1178	1.81998	0.119836	0.424891	9.96733	0.113774	47.3639	0.0431807	4.68552	0.0137978	40.5276	0.118033	98.5887	3.77473	2.02349	0.0737982		091_VU107-A6	80	0.008279	8.3e-05	0.012654	0.0001238	0.0059809	0.0001179	0.0358448	0.0002252	2.54338	0.0031073		091_VU107-A6	80	091_VU107-A6	groundmass	IR216	Klaudia Kuiper	28.201	0.08	0.0047753	0.1	0.986385	0.1	1	1e-13
	092_VU107-A6	16		0.00353623	6.03725	2.5037	1.48868	0.137578	0.410747	11.5797	0.113609	55.2947	0.0505059	4.70083	0.0160926	40.6586	0.137654	98.4295	4.38535	1.98848	0.0593763		092_VU107-A6	16	0.008279	8.3e-05	0.012654	0.0001238	0.0059809	0.0001179	0.0358448	0.0002252	2.54338	0.0031073		092_VU107-A6	16	092_VU107-A6	groundmass	IR216	Klaudia Kuiper	28.201	0.08	0.0047753	0.1	0.986385	0.1	1	1e-13
			S	0.111494	0.814184	32.225	0.473547	3.16211	0.0908454	264.038	0.0270091	1292.84	0.0103026
	Information on Analysis and Constants Used in Calculations									Results		40(a)/36(a)	± 2s	40(r)/39(k)	± 2s	Age	± 2s	MSWD	39Ar(k)	K/Ca	± 2s
																(Ma)			(%,n)
	Sample = 069_VU107-A6				Age Equations = Min et al. (2000)					Age Plateau Error Mean				4.7734	0.00607879	41.2792	0.0967783	2.0245	55.6678	4.00681	0.130368
	Material = groundmass				Negative Intensities = Allowed										0.00127347		0.00234448	0.0270185	11
	Location = IR216				Decay Constant 40K = 5.460 ± 0.053 E-10 1/a					Full External Error							0.86249	1.89443	2σ Confidence Limit
	Analyst = Klaudia Kuiper				Decay Constant 39Ar = 2.940 ± 0.016 E-07 1/h					Analytical Error							0.0519796	1.42285	Error Magnification
	Project = VU107				Decay Constant 37Ar = 8.230 ± 0.012 E-04 1/h
	Mass Discrimination Law = LIN				Decay Constant 36Cl = 2.257 ± 0.015 E-06 1/a					Total Fusion Age				4.77949	0.0034525	41.3313	0.0869041		20	3.52294	0.0334198
	Irradiation = VU107				Decay Activity 40K(EC,β⁺) = 3.310 ± 0.030 1/gs										0.000722357		0.00210262
	J = 0.00477530 ± 0.00000478				Decay Activity 40K(β⁻) = 27.890 ± 0.150 1/gs					Full External Error							0.862505
	FCs = 28.201 ± 0.023 Ma				Atmospheric Ratio 40/36(a) = 298.56 ± 0.31					Analytical Error							0.0295214
	IGSN = Undefined				Atmospheric Ratio 38/36(a) = 0.1885 ± 0.0003
	Preferred Age = Undefined				Production Ratio 39/37(ca) = 0.000673 ± 0.000004					Normal Isochron		303.579	19.2947	4.77126	0.00653557	41.2609	0.0989019	1.78847	55.6678
	Classification = Undefined				Production Ratio 36/37(ca) = 0.000264 ± 0.000002								0.0635575		0.00136978		0.00239699	0.0648993	11
	Experiment Type = Undefined				Production Ratio 40/39(k) = 0.000860 ± 0.000070					Full External Error							0.862357	1.94281	2σ Confidence Limit
	Extraction Method = Undefined				Production Ratio 38/39(k) = 0.012110 ± 0.000030					Analytical Error							0.055886	1.33734	Error Magnification
	Heating = 720 sec				Production Ratio 36/38(cl) = 262.80 ± 1.71												1		Number of Iterations
	Isolation = 18.00 min				Scaling Ratio K/Ca = 0.430												9.95888e-08		Convergence
	Instrument = HELIX				Abundance Ratio 40K/K = 1.1700 ± 0.0100 E-04
	Lithology = Undefined				Atomic Weight K = 39.0983 ± 0.0001 g					Inverse Isochron Error Chron		303.909	21.1837	4.77263	0.00710505	41.2727	0.101751	2.18687	55.6678
	Lat-Lon = Undefined - Undefined												0.0697042		0.00148871		0.00246534	0.0199809	11
	Feature = Undefined									Full External Error							0.862929	1.94281	2σ Confidence Limit
										Analytical Error							0.0607553	1.47881	Error Magnification
																	2		Number of Iterations
																	0.000405093		Convergence
																	0.0990225		Spreading Factor
[truncated: 39 more columns]

## Sheet: Hidden Data
Double Line Plot Age Plateau			Double Line Plot K/Ca Plateau			X-Y Plot Normal Isochron		X-Y Plot Inverse Isochron		Error Ellipses Normal Isochron		Error Ellipses Inverse Isochron
Ar39k%	Line 1	Line 2	Ar39k%	Line 1	Line 2	X-axis	Y-axis	X-axis	Y-axis	X-axis	Y-axis	X-axis	Y-axis
0	55.6048	57.5914	0	2.82412	5.21856	94.8375	921.869	0.102875	0.00108475			0.103199	0.00108531
0.595201	55.6048	57.5914	0.595201	2.82412	5.21856	119.707	1011.86	0.118303	0.000988277			0.103188	0.00107505
0.595201	51.8029	50.9715	0.595201	4.33069	3.20027	290.46	1752.8	0.165711	0.000570514			0.103156	0.00106545
1.88626	51.8029	50.9715	1.88626	4.33069	3.20027	583.923	3092.4	0.188825	0.000323374			0.103104	0.00105717
1.88626	43.0705	43.4757	1.88626	3.36953	3.87458	2141.29	10511	0.203719	9.51383e-05			0.103037	0.00105077
4.17403	43.0705	43.4757	4.17403	3.36953	3.87458	7159.02	34423	0.207972	2.90504e-05			0.102959	0.00104668
4.17403	41.5842	41.1658	4.17403	3.72472	3.12871	16982.3	81324.7	0.208821	1.22964e-05			0.102875	0.00104519
6.5925	41.5842	41.1658	6.5925	3.72472	3.12871	22824.6	109602	0.20825	9.12393e-06			0.102791	0.0010464
6.5925	41.1219	41.3663	6.5925	3.58368	3.91438	16337.8	78457.9	0.208236	1.27457e-05			0.102713	0.00105021
10.7407	41.1219	41.3663	10.7407	3.58368	3.91438	13532.2	64963.4	0.208306	1.53933e-05			0.102646	0.00105639
10.7407	41.3429	41.0998	10.7407	4.0389	3.65903	15623.7	75045.4	0.20819	1.33253e-05			0.102595	0.00106449
15.1075	41.3429	41.0998	15.1075	4.0389	3.65903	20186.9	96553.6	0.209075	1.03569e-05			0.102562	0.00107398
15.1075	41.1469	41.3741	15.1075	3.83879	4.2192	18633.9	89041.1	0.209272	1.12308e-05			0.102551	0.0010842
19.9499	41.1469	41.3741	19.9499	3.83879	4.2192	24927.1	118942	0.209573	8.40747e-06			0.102562	0.00109446
19.9499	41.5295	41.2931	19.9499	4.19876	3.81209	13585.1	64636.5	0.210176	1.54711e-05			0.102594	0.00110405
25.3425	41.5295	41.2931	25.3425	4.19876	3.81209	14117.2	66959.3	0.210833	1.49344e-05			0.102646	0.00111233
25.3425	41.2631	41.4761	25.3425	4.15139	4.55129	13803.5	65439.5	0.210935	1.52813e-05			0.102713	0.00111874
31.0871	41.2631	41.4761	31.0871	4.15139	4.55129	6118.42	28916.3	0.211591	3.45826e-05			0.102791	0.00112282
31.0871	41.4349	41.212	31.0871	4.22252	3.87825	4509	21425.6	0.21045	4.66732e-05			0.102875	0.00112431
36.2341	41.4349	41.212	36.2341	4.22252	3.87825	4026.78	19227.8	0.209425	5.20082e-05			0.102959	0.00112311
36.2341	41.2284	41.5148	36.2341	4.06951	4.38904							0.103037	0.00111929
42.1564	41.2284	41.5148	42.1564	4.06951	4.38904							0.103104	0.00111312
42.1564	41.3594	41.1099	42.1564	4.52148	4.09435							0.103156	0.00110501
46.6903	41.3594	41.1099	46.6903	4.52148	4.09435							0.103188	0.00109553
46.6903	41.0711	41.2999	46.6903	3.79679	4.13546							0.103199	0.00108531
52.99	41.0711	41.2999	52.99	3.79679	4.13546
52.99	41.2701	41.0526	52.99	4.06408	3.7856							0.118605	0.000988682
59.8418	41.2701	41.0526	59.8418	4.06408	3.7856							0.118595	0.000983969
59.8418	40.8461	41.0717	59.8418	3.70553	3.97529							0.118565	0.000979549
67.4894	40.8461	41.0717	67.4894	3.70553	3.97529							0.118517	0.000975725
67.4894	40.9387	40.7396	67.4894	3.71488	3.53531							0.118454	0.000972755
75.6039	40.9387	40.7396	75.6039	3.71488	3.53531							0.118381	0.000970843
75.6039	40.7098	40.9212	75.6039	3.4224	3.62191							0.118303	0.00097012
84.4659	40.7098	40.9212	84.4659	3.4224	3.62191							0.118225	0.000970633
84.4659	40.5664	40.3483	84.4659	2.95665	2.77439							0.118152	0.00097235
91.8399	40.5664	40.3483	91.8399	2.95665	2.77439							0.11809	0.000975151
91.8399	40.4095	40.6456	91.8399	1.94969	2.09729							0.118042	0.000978847
95.6146	40.4095	40.6456	95.6146	1.94969	2.09729							0.118012	0.000983186
95.6146	40.7962	40.5209	95.6146	2.04786	1.9291							0.118001	0.000987871
100	40.7962	40.5209	100	2.04786	1.9291							0.118012	0.000992585
												0.118042	0.000997004
												0.11809	0.00100083
												0.118152	0.0010038
												0.118225	0.00100571
												0.118303	0.00100643
												0.118381	0.00100592
												0.118454	0.0010042
												0.118517	0.0010014
												0.118565	0.000997707
												0.118595	0.000993368
												0.118605	0.000988682
												0.166173	0.000570727
												0.166157	0.000568023
												0.166111	0.000565488
												0.166038	0.000563296
												0.165942	0.000561597
												0.165831	0.000560504
												0.165711	0.000560094
												0.165592	0.000560394
												0.165481	0.000561384
												0.165385	0.000562996
												0.165311	0.00056512
												0.165265	0.000567612
												0.16525	0.000570302
												0.165265	0.000573006
												0.165311	0.00057554
												0.165385	0.000577732
												0.165481	0.000579432
												0.165592	0.000580524
												0.165711	0.000580934
												0.165831	0.000580634
												0.165942	0.000579644
												0.166038	0.000578032
												0.166111	0.000575908
												0.166157	0.000573416
												0.166173	0.000570727
												0.189282	0.000323495
												0.189267	0.000319984
												0.189221	0.000316703
												0.189148	0.000313878
												0.189054	0.000311699
												0.188943	0.000310316
												0.188825	0.000309823
												0.188707	0.000310253
												0.188597	0.000311578
												0.188502	0.000313706
												0.18843	0.000316493
												0.188384	0.000319749
												0.188368	0.000323252
												0.188384	0.000326764
												0.18843	0.000330044
												0.188502	0.00033287
												0.188597	0.000335048
												0.188707	0.000336431
												0.188825	0.000336924
												0.188943	0.000336494
												0.189054	0.000335169
												0.189148	0.000333041
												0.189221	0.000330254
												0.189267	0.000326998
												0.189282	0.000323495
												0.204191	9.51694e-05
												0.204174	9.35774e-05
												0.204127	9.20918e-05
												0.204052	9.08139e-05
												0.203955	8.98306e-05
												0.203841	8.92091e-05
												0.203719	8.89916e-05
												0.203597	8.9193e-05
												0.203483	8.97995e-05
												0.203385	9.07699e-05
												0.203311	9.2038e-05
												0.203263	9.35174e-05
												0.203247	9.51072e-05
												0.203263	9.66991e-05
												0.203311	9.81847e-05
												0.203385	9.94627e-05
												0.203483	0.000100446
												0.203597	0.000101067
												0.203719	0.000101285
												0.203841	0.000101084
												0.203955	0.000100477
												0.204052	9.95066e-05
												0.204127	9.82385e-05
												0.204174	9.67592e-05
												0.204191	9.51694e-05
												0.208453	2.90582e-05
												0.208437	2.74414e-05
												0.208388	2.59343e-05
												0.208312	2.46395e-05
												0.208213	2.36453e-05
												0.208097	2.30195e-05
												0.207972	2.28047e-05
												0.207848	2.30155e-05
												0.207732	2.36375e-05
												0.207632	2.46285e-05
												0.207556	2.59208e-05
												0.207508	2.74263e-05
												0.207491	2.90426e-05
												0.207508	3.06594e-05
												0.207556	3.21665e-05
												0.207632	3.34613e-05
												0.207732	3.44555e-05
												0.207848	3.50813e-05
												0.207972	3.52961e-05
												0.208097	3.50853e-05
												0.208213	3.44632e-05
												0.208312	3.34723e-05
												0.208388	3.218e-05
												0.208437	3.06744e-05
												0.208453	2.90582e-05
												0.20929	1.22996e-05
												0.209274	1.08796e-05
												0.209227	9.55607e-06
												0.209153	8.41931e-06
												0.209055	7.54677e-06
												0.208942	6.9979e-06
												0.208821	6.81012e-06
												0.2087	6.99622e-06
												0.208586	7.54351e-06
												0.208489	8.41471e-06
												0.208415	9.55043e-06
												0.208368	1.08733e-05
												0.208352	1.22931e-05
												0.208368	1.37132e-05
												0.208415	1.50367e-05
												0.208489	1.61735e-05
												0.208586	1.7046e-05
												0.2087	1.75949e-05
												0.208821	1.77827e-05
												0.208942	1.75966e-05
												0.209055	1.70493e-05
												0.209153	1.61781e-05
												0.209227	1.50423e-05
												0.209274	1.37195e-05
												0.20929	1.22996e-05
												0.208732	9.12656e-06
												0.208716	7.63783e-06
												0.208667	6.25038e-06
												0.208591	5.05876e-06
												0.208491	4.14417e-06
												0.208375	3.56894e-06
												0.20825	3.37228e-06
												0.208125	3.56758e-06
												0.208009	4.14154e-06
												0.207909	5.05504e-06
												0.207832	6.24583e-06
												0.207784	7.63275e-06
												0.207768	9.1213e-06
												0.207784	1.061e-05
												0.207832	1.19975e-05
												0.207909	1.31891e-05
												0.208009	1.41037e-05
												0.208125	1.46789e-05
												0.20825	1.48756e-05
												0.208375	1.46803e-05
												0.208491	1.41063e-05
												0.208591	1.31928e-05
												0.208667	1.2002e-05
												0.208716	1.06151e-05
												0.208732	9.12657e-06
												0.208718	1.27497e-05
												0.208702	1.17222e-05
												0.208653	1.07644e-05
												0.208577	9.94171e-06
												0.208477	9.31007e-06
												0.208361	8.91255e-06
												0.208236	8.77626e-06
												0.208111	8.91048e-06
												0.207995	9.30606e-06
												0.207895	9.93604e-06
												0.207819	1.07575e-05
												0.207771	1.17145e-05
												0.207754	1.27417e-05
												0.207771	1.37692e-05
												0.207819	1.47269e-05
												0.207895	1.55497e-05
												0.207995	1.61813e-05
												0.208111	1.65788e-05
												0.208236	1.67151e-05
												0.208361	1.65809e-05
												0.208477	1.61853e-05
												0.208577	1.55553e-05
												0.208653	1.47339e-05
												0.208702	1.37769e-05
												0.208718	1.27497e-05
												0.208783	1.5398e-05
												0.208767	1.4121e-05
												0.208719	1.29308e-05
												0.208643	1.19083e-05
												0.208544	1.11234e-05
												0.208429	1.06294e-05
												0.208306	1.04601e-05
												0.208182	1.06269e-05
												0.208067	1.11186e-05
												0.207968	1.19016e-05
												0.207893	1.29226e-05
												0.207845	1.41119e-05
												0.207829	1.53886e-05
												0.207845	1.66655e-05
												0.207893	1.78558e-05
												0.207968	1.88783e-05
												0.208067	1.96632e-05
												0.208182	2.01572e-05
												0.208306	2.03265e-05
												0.208429	2.01596e-05
												0.208544	1.96679e-05
												0.208643	1.88849e-05
												0.208719	1.7864e-05
												0.208767	1.66747e-05
												0.208783	1.5398e-05
												0.208801	1.33337e-05
												0.20878	1.16926e-05
												0.208719	1.01627e-05
												0.208622	8.84837e-06
												0.208495	7.83912e-06
												0.208348	7.20374e-06
												0.20819	6.98554e-06
												0.208031	7.19938e-06
												0.207884	7.83068e-06
												0.207757	8.83644e-06
												0.20766	1.01481e-05
												0.207599	1.16763e-05
												0.207578	1.33168e-05
												0.207599	1.4958e-05
												0.20766	1.64878e-05
												0.207757	1.78022e-05
												0.207884	1.88114e-05
												0.208031	1.94468e-05
												0.20819	1.9665e-05
												0.208348	1.94512e-05
												0.208495	1.88199e-05
												0.208622	1.78141e-05
												0.208719	1.65025e-05
												0.20878	1.49743e-05
												0.208801	1.33337e-05
												0.209549	1.036e-05
												0.209533	8.58581e-06
												0.209485	6.93237e-06
												0.20941	5.5123e-06
												0.209312	4.42239e-06
												0.209197	3.73691e-06
												0.209075	3.50257e-06
												0.208952	3.73535e-06
												0.208838	4.41938e-06
												0.208739	5.50804e-06
												0.208664	6.92715e-06
												0.208617	8.57999e-06
												0.208601	1.03539e-05
												0.208617	1.21281e-05
												0.208664	1.37815e-05
												0.208739	1.52016e-05
												0.208838	1.62915e-05
												0.208952	1.6977e-05
												0.209075	1.72113e-05
												0.209197	1.69785e-05
												0.209312	1.62945e-05
												0.20941	1.52059e-05
												0.209485	1.37867e-05
												0.209533	1.21339e-05
												0.209549	1.036e-05
												0.209766	1.12339e-05
												0.209749	9.91725e-06
												0.2097	8.69013e-06
												0.209622	7.63615e-06
												0.209519	6.82713e-06
												0.2094	6.31822e-06
												0.209272	6.14409e-06
												0.209145	6.3166e-06
												0.209026	6.82401e-06
												0.208923	7.63173e-06
												0.208845	8.68472e-06
												0.208795	9.91122e-06
												0.208779	1.12276e-05
												0.208795	1.25443e-05
												0.208845	1.37714e-05
												0.208923	1.48254e-05
												0.209026	1.56344e-05
												0.209145	1.61433e-05
												0.209272	1.63174e-05
												0.2094	1.61449e-05
												0.209519	1.56375e-05
												0.209622	1.48298e-05
												0.2097	1.37768e-05
												0.209749	1.25503e-05
												0.209766	1.12339e-05
												0.210058	8.40944e-06
												0.210041	7.25e-06
												0.209993	6.16944e-06
												0.209916	5.2414e-06
												0.209815	4.52912e-06
												0.209699	4.08115e-06
												0.209573	3.928e-06
												0.209448	4.08012e-06
												0.209331	4.52715e-06
												0.209231	5.23861e-06
												0.209154	6.16602e-06
												0.209106	7.24619e-06
												0.209089	8.40549e-06
												0.209106	9.56493e-06
												0.209154	1.06455e-05
												0.209231	1.15735e-05
												0.209331	1.22858e-05
												0.209448	1.27338e-05
												0.209573	1.28869e-05
												0.209699	1.27348e-05
												0.209815	1.22878e-05
												0.209916	1.15763e-05
												0.209993	1.06489e-05
												0.210041	9.56875e-06
												0.210058	8.40944e-06
												0.210699	1.54765e-05
												0.210682	1.4405e-05
												0.210629	1.34062e-05
												0.210546	1.25482e-05
												0.210438	1.18893e-05
												0.210311	1.14745e-05
												0.210176	1.13321e-05
												0.210041	1.14717e-05
												0.209914	1.18839e-05
												0.209806	1.25406e-05
												0.209723	1.33969e-05
												0.20967	1.43947e-05
												0.209653	1.54657e-05
												0.20967	1.65372e-05
												0.209723	1.7536e-05
												0.209806	1.83941e-05
												0.209914	1.9053e-05
												0.210041	1.94678e-05
												0.210176	1.96102e-05
												0.210311	1.94705e-05
												0.210438	1.90583e-05
												0.210546	1.84017e-05
												0.210629	1.75453e-05
												0.210682	1.65476e-05
												0.210699	1.54765e-05
												0.211299	1.49375e-05
												0.211283	1.39975e-05
												0.211237	1.31213e-05
												0.211163	1.23687e-05
												0.211066	1.1791e-05
												0.210954	1.14274e-05
												0.210833	1.13029e-05
												0.210713	1.14259e-05
												0.2106	1.17879e-05
												0.210504	1.23644e-05
												0.21043	1.3116e-05
												0.210383	1.39916e-05
												0.210367	1.49314e-05
												0.210383	1.58714e-05
												0.21043	1.67476e-05
												0.210504	1.75002e-05
												0.2106	1.80779e-05
												0.210713	1.84414e-05
												0.210833	1.8566e-05
												0.210954	1.8443e-05
												0.211066	1.8081e-05
												0.211163	1.75045e-05
												0.211237	1.67528e-05
												0.211283	1.58773e-05
												0.211299	1.49375e-05
												0.211432	1.52854e-05
												0.211415	1.4303e-05
												0.211365	1.33873e-05
												0.211286	1.26007e-05
												0.211183	1.19967e-05
												0.211063	1.16166e-05
												0.210935	1.14862e-05
												0.210806	1.16144e-05
												0.210686	1.19926e-05
												0.210583	1.25948e-05
												0.210504	1.33802e-05
												0.210455	1.42951e-05
												0.210438	1.52772e-05
												0.210455	1.62595e-05
												0.210504	1.71753e-05
												0.210583	1.79619e-05
												0.210686	1.85659e-05
												0.210806	1.8946e-05
												0.210935	1.90764e-05
												0.211063	1.89481e-05
												0.211183	1.857e-05
												0.211286	1.79677e-05
												0.211365	1.71824e-05
												0.211415	1.62675e-05
												0.211432	1.52854e-05
												0.212069	3.45916e-05
												0.212053	3.32909e-05
												0.212005	3.20783e-05
												0.211929	3.10364e-05
												0.21183	3.02361e-05
												0.211715	2.9732e-05
												0.211591	2.95585e-05
												0.211467	2.97273e-05
												0.211351	3.0227e-05
												0.211252	3.10236e-05
												0.211176	3.20627e-05
												0.211128	3.32735e-05
												0.211112	3.45735e-05
												0.211128	3.58742e-05
												0.211176	3.70868e-05
												0.211252	3.81288e-05
												0.211351	3.8929e-05
												0.211467	3.94331e-05
												0.211591	3.96067e-05
												0.211715	3.94378e-05
												0.21183	3.89381e-05
												0.211929	3.81415e-05
												0.212005	3.71024e-05
												0.212053	3.58916e-05
												0.212069	3.45916e-05
												0.210962	4.66876e-05
												0.210944	4.52764e-05
												0.210893	4.39605e-05
												0.210812	4.28294e-05
												0.210706	4.19602e-05
												0.210582	4.14123e-05
												0.21045	4.12229e-05
												0.210317	4.14049e-05
												0.210193	4.19459e-05
												0.210087	4.28091e-05
												0.210006	4.39356e-05
												0.209955	4.52487e-05
												0.209937	4.66589e-05
												0.209955	4.80701e-05
												0.210006	4.9386e-05
												0.210087	5.05171e-05
												0.210193	5.13862e-05
												0.210317	5.19342e-05
												0.21045	5.21236e-05
												0.210582	5.19416e-05
												0.210706	5.14006e-05
												0.210812	5.05374e-05
												0.210893	4.94108e-05
												0.210944	4.80977e-05
												0.210962	4.66876e-05
												0.209946	5.20295e-05
												0.209928	5.00273e-05
												0.209876	4.81601e-05
												0.209794	4.65551e-05
												0.209686	4.53217e-05
												0.20956	4.4544e-05
												0.209425	4.4275e-05
												0.209291	4.45329e-05
												0.209165	4.53003e-05
												0.209057	4.65248e-05
												0.208974	4.8123e-05
												0.208922	4.9986e-05
												0.208904	5.19868e-05
												0.208922	5.3989e-05
												0.208974	5.58562e-05
												0.209057	5.74612e-05
												0.209165	5.86946e-05
												0.209291	5.94723e-05
												0.209425	5.97414e-05
												0.20956	5.94834e-05
												0.209686	5.8716e-05
												0.209794	5.74915e-05
												0.209876	5.58933e-05
												0.209928	5.40303e-05
												0.209946	5.20295e-05
