# Supplementary material for: Exploring a link between the Middle Eocene Climatic Optimum and Neotethys continental arc flare-up
Source: Copernicus journal article supplement (doi:10.5194/cp-17-229-2021), 2021-01-18
Supplement: Supplementary file 24 [file S32_VU107-A6_2.xls]

## Sheet: Summary Table
	Relative Abundances			36Ar [fA]	%1s	37Ar [fA]	%1s	38Ar [fA]	%1s	39Ar [fA]	%1s	40Ar [fA]	%1s	40(r)/39(k)	± 2s	Age	± 2s	40Ar(r)	39Ar(k)	K/Ca	± 2s		Procedure Blanks		36Ar [fA]	1s	37Ar [fA]	1s	38Ar [fA]	1s	39Ar [fA]	1s	40Ar [fA]	1s		Sample Parameters		Sample	Material	Location	Analyst	Standard	%1s	J	%1s	MDF	%1s	Volume Ratio	Sensitivity
																(Ma)		(%)	(%)																							(in Ma)							(mol/volt)
	067_VU107-A6_2	13		0.151815	0.664024	2.32309	1.69268	0.284853	0.388965	22.049	0.24841	166.496	0.0609601	5.5033	0.0399513	47.51	0.340462	72.8751	2.75235	4.08095	0.139635		067_VU107-A6_2	13	0.0095155	0.0001197	0.0112895	0.0001587	0.00581	9.01e-05	0.201574	0.0351709	2.93662	0.0040544		067_VU107-A6_2	13	067_VU107-A6_2	IR216	groundmass	Klaudia Kuiper	28.201	0.08	0.0047753	0.1	0.985339	0.1	1	1e-13
	068_VU107-A6_2	15.3		0.0465634	0.64349	4.82493	1.34818	0.497803	0.326138	41.403	0.180933	208.677	0.0535161	4.71307	0.0184189	40.7633	0.157544	93.5032	5.16825	3.68957	0.100376		068_VU107-A6_2	15.3	0.0095155	0.0001197	0.0112895	0.0001587	0.00581	9.01e-05	0.201574	0.0351709	2.93662	0.0040544		068_VU107-A6_2	15.3	068_VU107-A6_2	IR216	groundmass	Klaudia Kuiper	28.201	0.08	0.0047753	0.1	0.985339	0.1	1	1e-13
	069_VU107-A6_2	17		0.0118867	1.93448	5.44347	1.44209	0.587354	0.240569	49.4763	0.174388	235.034	0.056642	4.68686	0.0174365	40.5391	0.149159	98.6545	6.17605	3.90803	0.113536		069_VU107-A6_2	17	0.0095155	0.0001197	0.0112895	0.0001587	0.00581	9.01e-05	0.201574	0.0351709	2.93662	0.0040544		069_VU107-A6_2	17	069_VU107-A6_2	IR216	groundmass	Klaudia Kuiper	28.201	0.08	0.0047753	0.1	0.985339	0.1	1	1e-13
	071_VU107-A6_2	18.8	4	0.00622881	3.86719	5.98854	1.06337	0.673992	0.310944	56.7324	0.163713	268.847	0.0598993	4.71388	0.0166429	40.7702	0.142352	99.4657	7.08184	4.07331	0.0876497		071_VU107-A6_2	18.8	0.0106102	0.0001204	0.0120527	0.0001219	0.0066044	0.0001208	0.248828	0.0093075	3.37886	0.0040506		071_VU107-A6_2	18.8	071_VU107-A6_2	IR216	groundmass	Klaudia Kuiper	28.201	0.08	0.0047753	0.1	0.985339	0.1	1	1e-13
	072_VU107-A6_2	20.5	4	0.00582283	4.08021	6.83428	1.0548	0.801221	0.284451	67.6725	0.168223	321.043	0.0593453	4.7258	0.0170001	40.8721	0.1454	99.6082	8.44751	4.25754	0.090952		072_VU107-A6_2	20.5	0.0106102	0.0001204	0.0120527	0.0001219	0.0066044	0.0001208	0.248828	0.0093075	3.37886	0.0040506		072_VU107-A6_2	20.5	072_VU107-A6_2	IR216	groundmass	Klaudia Kuiper	28.201	0.08	0.0047753	0.1	0.985339	0.1	1	1e-13
	073_VU107-A6_2	23	4	0.0055952	4.06512	7.77897	1.02876	0.925584	0.26278	78.3776	0.164885	371.952	0.0728487	4.73161	0.0171573	40.9218	0.14674	99.6976	9.78383	4.33221	0.0902735		073_VU107-A6_2	23	0.0106102	0.0001204	0.0120527	0.0001219	0.0066044	0.0001208	0.248828	0.0093075	3.37886	0.0040506		073_VU107-A6_2	23	073_VU107-A6_2	IR216	groundmass	Klaudia Kuiper	28.201	0.08	0.0047753	0.1	0.985339	0.1	1	1e-13
	075_VU107-A6_2	25	4	0.00758536	3.63329	8.4626	0.970999	0.955982	0.297505	81.0172	0.179353	384.245	0.101868	4.72251	0.0196104	40.8441	0.167728	99.5661	10.1133	4.11634	0.0812917		075_VU107-A6_2	25	0.0096441	0.0001403	0.0112666	0.0001397	0.0069975	0.0001256	0.3295	0.0124423	3.30886	0.0067108		075_VU107-A6_2	25	075_VU107-A6_2	IR216	groundmass	Klaudia Kuiper	28.201	0.08	0.0047753	0.1	0.985339	0.1	1	1e-13
	076_VU107-A6_2	27	4	0.00640769	4.02561	7.62773	0.975918	0.835937	0.265994	70.4686	0.173973	333.446	0.0810088	4.7127	0.0182358	40.7601	0.155978	99.5884	8.79649	3.97226	0.0787544		076_VU107-A6_2	27	0.0096441	0.0001403	0.0112666	0.0001397	0.0069975	0.0001256	0.3295	0.0124423	3.30886	0.0067108		076_VU107-A6_2	27	076_VU107-A6_2	IR216	groundmass	Klaudia Kuiper	28.201	0.08	0.0047753	0.1	0.985339	0.1	1	1e-13
	077_VU107-A6_2	30.5		0.00919344	2.78654	9.97922	1.04181	1.02611	0.226026	86.243	0.168193	405.341	0.0765413	4.67678	0.0173933	40.4529	0.148797	99.4986	10.7655	3.71588	0.0784276		077_VU107-A6_2	30.5	0.0096441	0.0001403	0.0112666	0.0001397	0.0069975	0.0001256	0.3295	0.0124423	3.30886	0.0067108		077_VU107-A6_2	30.5	077_VU107-A6_2	IR216	groundmass	Klaudia Kuiper	28.201	0.08	0.0047753	0.1	0.985339	0.1	1	1e-13
	079_VU107-A6_2	35		0.00914936	2.95932	9.9596	1.0136	0.994262	0.282952	84.0151	0.156594	393.599	0.0574724	4.6612	0.0156819	40.3195	0.134166	99.4871	10.4874	3.62702	0.0743991		079_VU107-A6_2	35	0.0097697	0.0001027	0.0116323	0.0001238	0.0081692	0.0001571	0.405435	0.0070774	3.82137	0.0052471		079_VU107-A6_2	35	079_VU107-A6_2	IR216	groundmass	Klaudia Kuiper	28.201	0.08	0.0047753	0.1	0.985339	0.1	1	1e-13
	080_VU107-A6_2	50		0.0148225	1.85861	12.9365	0.999609	1.10727	0.215653	92.9775	0.156427	433.725	0.0549003	4.62778	0.0154636	40.0336	0.132319	99.1963	11.606	3.09022	0.0625324		080_VU107-A6_2	50	0.0097697	0.0001027	0.0116323	0.0001238	0.0081692	0.0001571	0.405435	0.0070774	3.82137	0.0052471		080_VU107-A6_2	50	080_VU107-A6_2	IR216	groundmass	Klaudia Kuiper	28.201	0.08	0.0047753	0.1	0.985339	0.1	1	1e-13
	081_VU107-A6_2	16		0.0232605	1.5626	17.8615	0.905352	0.849853	0.235572	70.6753	0.164508	332.701	0.0726595	4.62904	0.0169861	40.0444	0.145346	98.3175	8.82143	1.70116	0.0313075		081_VU107-A6_2	16	0.0097697	0.0001027	0.0116323	0.0001238	0.0081692	0.0001571	0.405435	0.0070774	3.82137	0.0052471		081_VU107-A6_2	16	081_VU107-A6_2	IR216	groundmass	Klaudia Kuiper	28.201	0.08	0.0047753	0.1	0.985339	0.1	1	1e-13
			S	0.298331	0.451528	100.02	0.322054	9.54022	0.0794132	801.108	0.0504753	3855.11	0.0211514
	Information on Analysis and Constants Used in Calculations									Results		40(a)/36(a)	± 2s	40(r)/39(k)	± 2s	Age	± 2s	MSWD	39Ar(k)	K/Ca	± 2s
																(Ma)			(%,n)
	Sample = 067_VU107-A6_2				Age Equations = Min et al. (2000)					Age Plateau				4.72137	0.00788723	40.8342	0.105232	0.855614	44.2229	4.1378	0.128883
	Material = IR216				Negative Intensities = Allowed										0.00167054		0.00257704	0.489766	5
	Location = groundmass				Decay Constant 40K = 5.460 ± 0.053 E-10 1/a					Full External Error							0.85439	2.41421	2σ Confidence Limit
	Analyst = Klaudia Kuiper				Decay Constant 39Ar = 2.940 ± 0.016 E-07 1/h					Analytical Error							0.0674599	1	Error Magnification
	Project = VU107				Decay Constant 37Ar = 8.230 ± 0.012 E-04 1/h
	Mass Discrimination Law = LIN				Decay Constant 36Cl = 2.257 ± 0.015 E-06 1/a					Total Fusion Age				4.71041	0.00527177	40.7405	0.0923395		12	3.44377	0.0224524
	Irradiation = VU107				Decay Activity 40K(EC,β⁺) = 3.310 ± 0.030 1/gs										0.00111917		0.00226653
	J = 0.00477530 ± 0.00000478				Decay Activity 40K(β⁻) = 27.890 ± 0.150 1/gs					Full External Error							0.850981
	FCs = 28.201 ± 0.023 Ma				Atmospheric Ratio 40/36(a) = 298.56 ± 0.31					Analytical Error							0.045092
	IGSN = Undefined				Atmospheric Ratio 38/36(a) = 0.1885 ± 0.0003
	Preferred Age = Undefined				Production Ratio 39/37(ca) = 0.000673 ± 0.000004					Normal Isochron		-225.303	640.627	4.75456	0.0411838	41.1181	0.361459	0.405613	44.2229
	Classification = Undefined				Production Ratio 36/37(ca) = 0.000264 ± 0.000002								2.84341		0.00866195		0.00879073	0.748969	5
	Experiment Type = Undefined				Production Ratio 40/39(k) = 0.000860 ± 0.000070					Full External Error							0.927095	2.63299	2σ Confidence Limit
	Extraction Method = Undefined				Production Ratio 38/39(k) = 0.012110 ± 0.000030					Analytical Error							0.352192	1	Error Magnification
	Heating = 720 sec				Production Ratio 36/38(cl) = 262.80 ± 1.71												1		Number of Iterations
	Isolation = 18.00 min				Scaling Ratio K/Ca = 0.430												2.37107e-06		Convergence
	Instrument = HELIX				Abundance Ratio 40K/K = 1.1700 ± 0.0100 E-04
	Lithology = Undefined				Atomic Weight K = 39.0983 ± 0.0001 g					Inverse Isochron Clustered Points		-181.779	295.306	4.75168	0.0411316	41.0935	0.361017	0.403515	44.2229
	Lat-Lon = Undefined - Undefined												1.62453		0.00865621		0.00878527	0.750476	5
	Feature = Undefined									Full External Error							0.926456	2.63299	2σ Confidence Limit
										Analytical Error							0.351751	1	Error Magnification
																	4		Number of Iterations
																	1.16579e-05		Convergence
																	0.00291495		Spreading Factor
[truncated: 39 more columns]

## Sheet: Hidden Data
Double Line Plot Age Plateau			Double Line Plot K/Ca Plateau			X-Y Plot Normal Isochron		X-Y Plot Inverse Isochron		Error Ellipses Normal Isochron		Error Ellipses Inverse Isochron
Ar39k%	Line 1	Line 2	Ar39k%	Line 1	Line 2	X-axis	Y-axis	X-axis	Y-axis	X-axis	Y-axis	X-axis	Y-axis
0	47.1695	47.8504	0	3.94132	4.22059	145.815	1101.02	0.132436	0.000908247			0.133113	0.000908511
2.75235	47.1695	47.8504	2.75235	3.94132	4.22059	914.111	4606.83	0.198425	0.000217069			0.13309	0.000905355
2.75235	40.9208	40.6057	2.75235	3.78994	3.58919	4734.41	22488.1	0.21053	4.4468e-05			0.133022	0.000902396
7.92061	40.9208	40.6057	7.92061	3.78994	3.58919	12205.3	57833.1	0.211044	1.72912e-05			0.132915	0.000899836
7.92061	40.3899	40.6883	7.92061	3.79449	4.02156	16838.8	79875.1	0.210814	1.25195e-05			0.132774	0.000897849
14.0967	40.3899	40.6883	14.0967	3.79449	4.02156	22129.4	105006	0.210744	9.52325e-06			0.132611	0.000896571
14.0967	40.9125	40.6278	14.0967	4.16096	3.98566	15138.8	71791.9	0.210871	1.39291e-05			0.132436	0.000896088
21.1785	40.9125	40.6278	21.1785	4.16096	3.98566	16036.4	75873.4	0.211357	1.31799e-05			0.13226	0.000896434
21.1785	40.7267	41.0175	21.1785	4.16658	4.34849	13147.9	61788.6	0.212789	1.61842e-05			0.132097	0.000897585
29.626	40.7267	41.0175	29.626	4.16658	4.34849	12884.7	60356.6	0.213476	1.65682e-05			0.131957	0.000899463
29.626	41.0685	40.7751	29.626	4.42248	4.24193	8149.94	38014.7	0.214389	2.63056e-05			0.131849	0.000901939
39.4098	41.0685	40.7751	39.4098	4.42248	4.24193	3810.34	17936.8	0.212432	5.57513e-05			0.131781	0.000904845
39.4098	40.6763	41.0118	39.4098	4.03505	4.19763							0.131758	0.000907983
49.5231	40.6763	41.0118	49.5231	4.03505	4.19763							0.131781	0.000911139
49.5231	40.9161	40.6042	49.5231	4.05101	3.8935							0.131849	0.000914098
58.3196	40.9161	40.6042	58.3196	4.05101	3.8935							0.131957	0.000916658
58.3196	40.3041	40.6017	58.3196	3.63746	3.79431							0.132097	0.000918645
69.0851	40.3041	40.6017	69.0851	3.63746	3.79431							0.13226	0.000919924
69.0851	40.4537	40.1854	69.0851	3.70141	3.55262							0.132436	0.000920407
79.5726	40.4537	40.1854	79.5726	3.70141	3.55262							0.132611	0.000920061
79.5726	39.9013	40.1659	79.5726	3.02769	3.15276							0.132774	0.00091891
91.1786	39.9013	40.1659	91.1786	3.02769	3.15276							0.132915	0.000917032
91.1786	40.1897	39.899	91.1786	1.73247	1.66985							0.133022	0.000914556
100	40.1897	39.899	100	1.73247	1.66985							0.13309	0.000911649
												0.133113	0.000908511
												0.199174	0.000217135
												0.199149	0.000216386
												0.199074	0.000215683
												0.198955	0.000215075
												0.1988	0.000214602
												0.198619	0.000214298
												0.198425	0.000214182
												0.198231	0.000214264
												0.198051	0.000214536
												0.197896	0.000214981
												0.197777	0.000215569
												0.197702	0.000216258
												0.197676	0.000217003
												0.197702	0.000217752
												0.197777	0.000218455
												0.197896	0.000219064
												0.198051	0.000219536
												0.198231	0.00021984
												0.198425	0.000219956
												0.198619	0.000219874
												0.1988	0.000219602
												0.198955	0.000219157
												0.199074	0.00021857
												0.199149	0.00021788
												0.199174	0.000217135
												0.211302	4.44836e-05
												0.211275	4.39739e-05
												0.211198	4.34979e-05
												0.211076	4.30881e-05
												0.210916	4.27722e-05
												0.21073	4.25719e-05
												0.21053	4.25009e-05
												0.21033	4.25639e-05
												0.210144	4.27566e-05
												0.209984	4.3066e-05
												0.209861	4.3471e-05
												0.209784	4.39438e-05
												0.209758	4.44524e-05
												0.209784	4.49621e-05
												0.209861	4.54381e-05
												0.209984	4.5848e-05
												0.210144	4.61638e-05
												0.21033	4.63641e-05
												0.21053	4.64352e-05
												0.210729	4.63722e-05
												0.210916	4.61794e-05
												0.211076	4.587e-05
												0.211198	4.54651e-05
												0.211275	4.49922e-05
												0.211302	4.44836e-05
												0.21178	1.72983e-05
												0.211755	1.68326e-05
												0.211682	1.63982e-05
												0.211565	1.60246e-05
												0.211412	1.57373e-05
												0.211235	1.5556e-05
												0.211044	1.54928e-05
												0.210854	1.55523e-05
												0.210676	1.57302e-05
												0.210524	1.60145e-05
												0.210407	1.63858e-05
												0.210334	1.68188e-05
												0.210308	1.7284e-05
												0.210334	1.77497e-05
												0.210407	1.81841e-05
												0.210524	1.85577e-05
												0.210676	1.8845e-05
												0.210854	1.90263e-05
												0.211044	1.90895e-05
												0.211235	1.903e-05
												0.211412	1.88521e-05
												0.211565	1.85678e-05
												0.211682	1.81965e-05
												0.211755	1.77635e-05
												0.21178	1.72983e-05
												0.211566	1.25245e-05
												0.21154	1.21395e-05
												0.211465	1.17804e-05
												0.211345	1.14716e-05
												0.21119	1.12343e-05
												0.211008	1.10846e-05
												0.210814	1.10326e-05
												0.210619	1.1082e-05
												0.210437	1.12294e-05
												0.210282	1.14646e-05
												0.210162	1.17718e-05
												0.210087	1.21299e-05
												0.210061	1.25146e-05
												0.210087	1.28996e-05
												0.210162	1.32587e-05
												0.210282	1.35674e-05
												0.210437	1.38048e-05
												0.210619	1.39545e-05
												0.210813	1.40064e-05
												0.211008	1.39571e-05
												0.21119	1.38097e-05
												0.211345	1.35744e-05
												0.211465	1.32673e-05
												0.21154	1.29092e-05
												0.211566	1.25245e-05
												0.211504	9.52886e-06
												0.211478	9.21017e-06
												0.211402	8.91281e-06
												0.211281	8.65706e-06
												0.211124	8.46033e-06
												0.21094	8.33604e-06
												0.210744	8.29265e-06
												0.210547	8.33313e-06
												0.210364	8.45472e-06
												0.210207	8.64912e-06
												0.210086	8.90309e-06
												0.21001	9.19933e-06
												0.209984	9.51764e-06
												0.21001	9.83634e-06
												0.210086	1.01337e-05
												0.210207	1.03895e-05
												0.210364	1.05862e-05
												0.210547	1.07105e-05
												0.210744	1.07539e-05
												0.21094	1.07134e-05
												0.211124	1.05918e-05
												0.211281	1.03974e-05
												0.211402	1.01434e-05
												0.211478	9.84718e-06
												0.211504	9.52887e-06
												0.211741	1.39432e-05
												0.211711	1.35696e-05
												0.211624	1.32206e-05
												0.211486	1.29199e-05
												0.211306	1.26879e-05
												0.211096	1.25406e-05
												0.210871	1.24878e-05
												0.210646	1.25333e-05
												0.210436	1.26739e-05
												0.210256	1.29001e-05
												0.210118	1.31963e-05
												0.210031	1.35426e-05
												0.210001	1.39151e-05
												0.210031	1.42886e-05
												0.210118	1.46377e-05
												0.210256	1.49384e-05
												0.210436	1.51704e-05
												0.210646	1.53177e-05
												0.210871	1.53705e-05
												0.211096	1.5325e-05
												0.211306	1.51844e-05
												0.211486	1.49582e-05
												0.211624	1.46619e-05
												0.211711	1.43157e-05
												0.211741	1.39432e-05
												0.212169	1.31889e-05
												0.212141	1.27864e-05
												0.21206	1.24107e-05
												0.211931	1.20874e-05
												0.211763	1.18386e-05
												0.211567	1.16812e-05
												0.211357	1.16259e-05
												0.211147	1.16765e-05
												0.210952	1.18296e-05
												0.210784	1.20746e-05
												0.210655	1.23951e-05
												0.210574	1.27689e-05
												0.210546	1.31708e-05
												0.210574	1.35733e-05
												0.210655	1.3949e-05
												0.210784	1.42723e-05
												0.210952	1.45211e-05
												0.211147	1.46785e-05
												0.211357	1.47338e-05
												0.211567	1.46832e-05
												0.211763	1.45302e-05
												0.211931	1.42851e-05
												0.21206	1.39647e-05
												0.212141	1.35908e-05
												0.212169	1.31889e-05
												0.213575	1.61945e-05
												0.213549	1.58643e-05
												0.21347	1.55559e-05
												0.213345	1.52903e-05
												0.213182	1.50857e-05
												0.212993	1.49559e-05
												0.212789	1.49098e-05
												0.212585	1.49506e-05
												0.212396	1.50754e-05
												0.212233	1.52758e-05
												0.212108	1.55381e-05
												0.212029	1.58445e-05
												0.212002	1.6174e-05
												0.212029	1.65041e-05
												0.212108	1.68125e-05
												0.212233	1.70781e-05
												0.212396	1.72828e-05
												0.212585	1.74125e-05
												0.212789	1.74586e-05
												0.212993	1.74179e-05
												0.213182	1.7293e-05
												0.213345	1.70926e-05
												0.21347	1.68303e-05
												0.213549	1.6524e-05
												0.213575	1.61945e-05
												0.214188	1.65748e-05
												0.214164	1.6216e-05
												0.214093	1.58812e-05
												0.21398	1.55932e-05
												0.213832	1.53716e-05
												0.21366	1.52316e-05
												0.213476	1.51827e-05
												0.213292	1.52282e-05
												0.21312	1.53651e-05
												0.212972	1.55839e-05
												0.212859	1.58698e-05
												0.212788	1.62033e-05
												0.212764	1.65616e-05
												0.212788	1.69205e-05
												0.212859	1.72553e-05
												0.212972	1.75432e-05
												0.21312	1.77648e-05
												0.213292	1.79048e-05
												0.213476	1.79537e-05
												0.21366	1.79082e-05
												0.213832	1.77713e-05
												0.21398	1.75525e-05
												0.214093	1.72666e-05
												0.214164	1.69331e-05
												0.214188	1.65748e-05
												0.2151	2.63152e-05
												0.215076	2.59824e-05
												0.215005	2.56716e-05
												0.214892	2.54041e-05
												0.214745	2.5198e-05
												0.214573	2.50673e-05
												0.214389	2.50211e-05
												0.214205	2.50624e-05
												0.214034	2.51884e-05
												0.213887	2.53905e-05
												0.213774	2.56551e-05
												0.213703	2.59639e-05
												0.213678	2.62961e-05
												0.213703	2.66288e-05
												0.213774	2.69396e-05
												0.213887	2.72072e-05
												0.214034	2.74133e-05
												0.214205	2.75439e-05
												0.214389	2.75902e-05
												0.214573	2.75489e-05
												0.214745	2.74229e-05
												0.214892	2.72207e-05
												0.215005	2.69562e-05
												0.215076	2.66473e-05
												0.2151	2.63152e-05
												0.213196	5.57841e-05
												0.21317	5.52112e-05
												0.213094	5.46751e-05
												0.212972	5.42124e-05
												0.212814	5.38546e-05
												0.21263	5.3626e-05
												0.212432	5.35422e-05
												0.212234	5.3609e-05
												0.21205	5.38218e-05
												0.211891	5.41661e-05
												0.21177	5.46184e-05
												0.211694	5.51479e-05
												0.211668	5.57186e-05
												0.211694	5.62914e-05
												0.21177	5.68275e-05
												0.211891	5.72902e-05
												0.21205	5.76481e-05
												0.212234	5.78767e-05
												0.212432	5.79604e-05
												0.21263	5.78936e-05
												0.212814	5.76808e-05
												0.212972	5.73365e-05
												0.213094	5.68842e-05
												0.21317	5.63547e-05
												0.213196	5.57841e-05
