# Supplementary material for: Exploring a link between the Middle Eocene Climatic Optimum and Neotethys continental arc flare-up
Source: Copernicus journal article supplement (doi:10.5194/cp-17-229-2021), 2021-01-18
Supplement: Supplementary file 25 [file S3_Literature list.docx]

List of references for literature data:

Aghazadeh, M., Castro, A., Badrzadeh, Z., Vogt, K., 2011. Post-collisional polycyclic plutonism from the Zagros hinterland: the Shaivar Dagh plutonic complex, Alborz belt, Iran. Geol. Mag. 148, 980–1008. https://doi.org/10.1017/S0016756811000380

Aghazadeh, M., Castro, A., Omran, N.R., Emami, M.H., Moinvaziri, H., Badrzadeh, Z., Rashidnejad, N., Hashem, M., Moinvaziri, H., Badrzadeh, Z., 2010. The gabbro (shoshonitic)-monzonite-granodiorite association of Khankandi pluton, Alborz Mountains, NW Iran. J. Asian Earth Sci. 38, 199–219. https://doi.org/10.1016/j.jseaes.2010.01.002

Aghazadeh, M., Hou, Z., Badrzadeh, Z., Zhou, L., 2015. Temporal-spatial distribution and tectonic setting of porphyry copper deposits in Iran: Constraints from zircon U-Pb and molybdenite Re-Os geochronology. Ore Geol. Rev. 70, 385–406. https://doi.org/10.1016/j.oregeorev.2015.03.003

Ahmadian, J., Sarjoughian, F., Lentz, D., Esna-Ashari, A., Murata, M., Ozawa, H., 2016. Eocene K-rich adakitic rocks in the Central Iran: Implications for evaluating its Cu-Au-Mo metallogenic potential. Ore Geol. Rev. 72, 323–342. https://doi.org/10.1016/j.oregeorev.2015.07.017

Alaminia, Z., Karimpour, M.H., Homam, S.M., Finger, F., 2013. The magmatic record in the Arghash region (northeast Iran) and tectonic implications. Int. J. Earth Sci. 102, 1603–1625. https://doi.org/10.1007/s00531-013-0897-1

Alizadeh, E., Ghadami, G., Esmaeily, D., Ma, C., Lentz, D.R., Omrani, J., Golmohammadi, A., 2017. Origin of 1.8 Ga zircons in Post Eocene mafic dikes in the Roshtkhar area, NE Iran. Int. Geol. Rev. 00, 1–28. https://doi.org/10.1080/00206814.2017.1396259

Allen, M.B., Mark, D.F., Kheirkhah, M., Barfod, D., Emami, M.H., Saville, C., 2011. 40Ar/39Ar dating of Quaternary lavas in northwest Iran: constraints on the landscape evolution and incision rates of the Turkish-Iranian plateau. Geophys. J. Int. 185, 1175–1188. https://doi.org/10.1111/j.1365-246X.2011.05022.x

Almasi, A., Karimpour, M.H., Arjmandzadeh, R., Santos, J.F., Ebrahimi Nasrabadi, K., 2019. Zircon U-Pb geochronology, geochemistry, Sr-Nd isotopic compositions, and tectonomagmatic implications of Nay (NE Iran) postcollisional intrusives in the Sabzevar zone. Turkish J. Earth Sci. 28, 372–397. https://doi.org/10.3906/yer-1805-36

Ao, S., Xiao, W., Khalatbari Jafari, M., Talebian, M., Chen, L., Wan, B., Ji, W., Zhang, Z., Khalatbari-Jafari, M., Talebian, M., Chen, L., Wan, B., Ji, W., Zhang, Z., Khalatbari Jafari, M., Talebian, M., Chen, L., Wan, B., Ji, W., Zhang, Z., 2016. U – Pb zircon ages, field geology and geochemistry of the Kermanshah ophiolite (Iran): From continental rifting at 79 Ma to oceanic core complex at ca . 36 Ma in the southern Neo-Tethys. Gondwana Res. 31, 1–14. https://doi.org/10.1016/j.gr.2015.01.014

Azizi, H., Asahara, Y., Mehrabi, B., Chung, S.L., 2011a. Geochronological and geochemical constraints on the petrogenesis of high-K granite from the Suffi abad area, Sanandaj-Sirjan Zone, NW Iran. Chemie der Erde - Geochemistry 71, 363–376. https://doi.org/10.1016/j.chemer.2011.06.005

Azizi, H., Hadad, S., Stern, R.J., Asahara, Y., 2018. Age, geochemistry, and emplacement of the ~40-Ma Baneh granite–appinite complex in a transpressional tectonic regime, Zagros suture zone, northwest Iran. Int. Geol. Rev. 61, 195–223. https://doi.org/10.1080/00206814.2017.1422394

Azizi, H., Tanaka, T., Asahara, Y., Chung, S.L., Zarrinkoub, M.H., 2011b. Discrimination of the age and tectonic setting for magmatic rocks along the Zagros thrust zone, northwest Iran, using the zircon U–Pb age and Sr–Nd isotopes. J. Geodyn. 52, 304–320. https://doi.org/10.1016/j.jog.2011.03.001

Babazadeh, S., Ghorbani, M.R., Bröcker, M., D’Antonio, M., Cottle, J., Gebbing, T., Carmine Mazzeo, F., Ahmadi, P., 2017. Late Oligocene–Miocene mantle upwelling and interaction inferred from mantle signatures in gabbroic to granitic rocks from the Urumieh–Dokhtar arc, south Ardestan, Iran. Int. Geol. Rev. 1–19. https://doi.org/10.1080/00206814.2017.1286613

Ballato, P., Cifelli, F., Heidarzadeh, G., Ghassemi, M.R., Wickert, A.D., Hassanzadeh, J., Dupont-Nivet, G., Balling, P., Sudo, M., Zeilinger, G., Schmitt, A.K., Mattei, M., Strecker, M.R., 2016. Tectono-sedimentary evolution of the northern Iranian Plateau: insights from middle-late Miocene foreland-basin deposits. Basin Res. 1, 1–30. https://doi.org/10.1017/CBO9781107415324.004

Bina, M.M., Bucur, I., Prevot, M., Meyerfeld, Y., Daly, L., Cantagrel, J.M., Mergoil, J., 1986. Palaeomagnetism, petrology and geochronology of Tertiary magmatic and sedimentary units from Iran. Tectonophysics 121, 303–329.

Caillat, C., Dehlavi, P., Jantin, B.M., 1978. Géologie de la région de Saveh (Iran): contribution a l 'etude du volcanisme et du plutonisme tertiaires de la zone de l ’ Iran central.

Castro, A., Aghazadeh, M., Badrzadeh, Z., Chichorro, M., 2013. Late Eocene-Oligocene post-collisional monzonitic intrusions from the Alborz magmatic belt, NW Iran. An example of monzonite magma generation from a metasomatized mantle source. Lithos 180–181, 109–127. https://doi.org/10.1016/j.lithos.2013.08.003

Chiu, H.-Y., Chung, S.-L., Zarrinkoub, M.H., Melkonyan, R., Pang, K.-N., Lee, H.-Y., Wang, K.-L., Mohammadi, S.S., Khatib, M.M., 2017. Zircon Hf isotopic constraints on magmatic and tectonic evolution in Iran: Implications for crustal growth in the Tethyan orogenic belt. J. Asian Earth Sci. 145, 652–669. https://doi.org/10.1016/j.jseaes.2017.06.011

Chiu, H.-Y., Chung, S.-L., Zarrinkoub, M.H., Mohammadi, S.S., Khatib, M.M., Iizuka, Y., 2013. Zircon U–Pb age constraints from Iran on the magmatic evolution related to Neotethyan subduction and Zagros orogeny. Lithos 162–163, 70–87. https://doi.org/10.1016/j.lithos.2013.01.006

Deevsalar, R., Shinjo, R., Wang, K.-L., Hadi, Y., Neill, I., 2018. Gabbroic – dioritic dykes from the Sanandaj – Sirjan Zone: windows on Jurassic and Eocene geodynamic processes in the Zagros Orogen, western Iran. J. Geol. Soc. London. 175, 915–933.

Delavari, M., Amini, S., Schmitt, A.K., McKeegan, K.D., Mark Harrison, T., 2014. U-Pb geochronology and geochemistry of Bibi-Maryam pluton, eastern Iran: Implication for the late stage of the tectonic evolution of the Sistan Ocean. Lithos 200–201, 197–211. https://doi.org/10.1016/j.lithos.2014.04.015

Etemadi, A., Nadermezerji, S., Karimpour, M.H., Shafaroudi, A.M., Santos, J.F., Ribeiro, S., 2020. Geochemistry, petrogenesis, zircon U Pb geochronology and Sr Nd isotopic composition of Kuh-e-Shah volcanic rocks: Implications for an active continental margin along with eastern Iran during the Paleogene. Lithos 105778. https://doi.org/10.1016/j.lithos.2020.105778

Guest, B., Horton, B.K., Axen, G.J., Hassanzadeh, J., McIntosh, W.C., 2007. Middle to late Cenozoic basin evolution in the western Alborz Mountains: Implications for the onset of collisional deformation in northern Iran. Tectonics 26, 1–26. https://doi.org/10.1029/2006TC002091

Haghighi Bardineh, S.N., Zarei Sahamieh, R., Zamanian, H., Ahmadi Khalaji, A., 2018. Geochemical, Sr-Nd isotopic investigations and U-Pb zircon chronology of the Takht granodiorite, west Iran: Evidence for post-collisional magmatism in the northern part of the Urumieh-Dokhtar magmatic assemblage. J. African Earth Sci. 139, 354–366. https://doi.org/10.1016/j.jafrearsci.2017.12.030

Honarmand, M., Li, X.-H., Nabatian, G., Neubauer, F., 2017. In-situ zircon U-Pb age and Hf-O isotopic constraints on the origin of the Hasan-Robat A-type granite from Sanandaj–Sirjan zone, Iran: implications for reworking of Cadomian arc igneous rocks. Mineral. Petrol. https://doi.org/10.1007/s00710-016-0490-y

Honarmand, M., Rashidnejad Omran, N., Neubauer, F., Hashem Emami, M., Nabatian, G., Liu, X., Dong, Y., von Quadt, A., Chen, B., 2014. Laser-ICP-MS U–Pb zircon ages and geochemical and Sr–Nd–Pb isotopic compositions of the Niyasar plutonic complex, Iran: constraints on petrogenesis and tectonic evolution. Int. Geol. Rev. 56, 104–132. https://doi.org/10.1080/00206814.2013.820375

Hosseinkhani, A., Karimpour, M.H., Malekzadeh Shafaroudi, A., Santos, J.F., 2017. U-Pb geochronology and petrogenesis of intrusive rocks: Constraints on the mode of genesis and timing of Cu mineralization in SWSK area, Lut Block. J. Geochemical Explor. 177, 11–27. https://doi.org/10.1016/j.gexplo.2017.02.001

Jamshidi, K., Ghasemi, H., Miao, L., Sadeghian, M., 2018. Adakite magmatism within the Sabzevar ophiolite zone, NE Iran: U-Pb geochronology and Sr-Nd isotopic evidences. Geopersia 8, 111–130. https://doi.org/10.22059/geope.2017.242944.648352

Javidi Moghaddam, M., Karimpour, M.H., Malekzadeh Shafaroudi, A., Santos, J.F., Corfu, F., 2020. Middle Eocene magmatism in the Khur region (Lut Block, Eastern Iran): implications for petrogenesis and tectonic setting. Int. Geol. Rev. 00, 1–16. https://doi.org/10.1080/00206814.2019.1708815

Javidi Moghaddam, M., Karimpour, M.H., Malekzadeh Shafaroudi, A., Santos, J.F., Mendes, M.H., 2019. Geochemistry, Sr-Nd isotopes and zircon U-Pb geochronology of intrusive rocks: Constraint on the genesis of the Cheshmeh Khuri Cu mineralization and its link with granitoids in the Lut Block, Eastern Iran. J. Geochemical Explor. 202, 59–76. https://doi.org/10.1016/j.gexplo.2019.04.001

Kazemi, K., Kananian, A., Xiao, Y., Sarjoughian, F., 2019. Petrogenesis of Middle-Eocene granitoids and their Mafic microgranular enclaves in central Urmia-Dokhtar Magmatic Arc (Iran): Evidence for interaction between felsic and mafic magmas. Geosci. Front. 10, 705–723. https://doi.org/10.1016/j.gsf.2018.04.006

Khaksar, T., Rashidnejad-Omran, N., Chen, F., Song, S.-G., Li, S.-Q., Ghaderi, M., 2020. Zircon U-P Pb Ages and Magmatic History of the Kashan Plutons in the Central Urumieh-Dokhtar Magmatic Arc, Iran: Evidence for Neotethyan Subduction during Paleogene – Neogene. J. Earth Sci. 31, 53–68.

Mahmoudi, S., Corfu, F., Masoudi, F., Mehrabi, B., Mohajjel, M., 2011. U-Pb dating and emplacement history of granitoid plutons in the northern Sanandaj-Sirjan Zone, Iran. J. Asian Earth Sci. 41, 238–249. https://doi.org/10.1016/j.jseaes.2011.03.006

Maleki, S., Alirezaei, S., Corfu, F., 2019. Dating of Oligocene granitoids in the Khak-Sorkh area, Central Urumieh-Dokhtar arc, Iran, and a genetic linkage with the associated skarn iron deposit. J. Asian Earth Sci. 182, 103930. https://doi.org/10.1016/j.jseaes.2019.103930

Mazhari, N., Malekzadeh Shafaroudi, A., Ghaderi, M., Lackey, J.S., Farmer, G.L., Karimpour, M.H., 2017. Geochronological and geochemical characteristics of fractionated I-type granites associated with the skarn mineralization in the Sangan mining region, NE Iran. Ore Geol. Rev. 84, 116–133. https://doi.org/10.1016/j.oregeorev.2017.01.003

Mazhari, S.A., Ghalamghash, J., Kumar, S., Gregory Shellnutt, J., Bea, F., 2020. Tectonomagmatic development of the Eocene Pasevh pluton (NW Iran): Implications for the Arabia-Eurasia collision. J. Asian Earth Sci. 203, 104551. https://doi.org/10.1016/j.jseaes.2020.104551

Mcinnes, B.I.A., Evans, N.J., Fu, F.Q., Garwin, S., Belousova, E., Griffin, W.L., Bertens, A., Sukarna, D., Permanadewi, S., Andrew, R.L., Deckart, K., 2005. Thermal History Analysis of Selected Chilean, Indonesian and Iranian Porphyry Cu-Mo-Au Deposits. Super Porphyry Copp. Gold Depos. A Glob. Perspect.

Mirnejad, H., Mathur, R., Hassanzadeh, J., Shafie, B., Nourali, S., 2013. Linking Cu mineralization to host porphyry emplacement: Re-Os ages of molybdenites versus U-Pb ages of zircons and sulfur isotope compositions of pyrite and chalcopyrite from the Iju and Sarkuh porphyry deposits in Southeast Iran. Econ. Geol. 108, 861–870.

Mirnejad, H., Raeisi, D., McFarlane, C., Sheibi, M., 2018. Tafresh intrusive rocks within the Urumieh-Dokhtar Magmatic Arc: Appraisal of Neo-Tethys subduction. Geol. J. 1–11. https://doi.org/10.1002/gj.3266

Moghadam, H.S., Corfu, F., Stern, R.J., 2013. U-Pb zircon ages of Late Cretaceous Nain-Dehshir ophiolites, central Iran. J. Geol. Soc. London. 170, 175–184. https://doi.org/10.1144/jgs2012-066.U

Moghadam, H.S., Ghorbani, G., Zaki Khedr, M., Fazlnia, N., Chiaradia, M., Eyuboglu, Y., Santosh, M., Galindo Francisco, C., Lopez Martinez, M., Gourgaud, A., Arai, S., 2014. Late Miocene K-rich volcanism in the Eslamieh Peninsula (Saray), NW Iran: Implications for geodynamic evolution of the Turkish-Iranian High Plateau. Gondwana Res. 26, 1028–1050. https://doi.org/10.1016/j.gr.2013.09.015

Moghadam, H.S., Li, X.-H., Ling, X.-X., Santos, J.F., Stern, R.J., Li, Q.-L., Ghorbani, G., 2015. Eocene Kashmar granitoids (NE Iran): Petrogenetic constraints from U-Pb zircon geochronology and isotope geochemistry. Lithos 216–217, 118–135. https://doi.org/10.1016/j.lithos.2014.12.012

Moghadam, H.S., Rossetti, F., Lucci, F., Chiaradia, M., Gerdes, A., Martinez, M.L., Ghorbani, G., Nasrabady, M., Lopez Martinez, M., Ghorbani, G., Nasrabady, M., Martinez, M.L., Ghorbani, G., Nasrabady, M., 2016. The calc-alkaline and adakitic volcanism of the Sabzevar structural zone (NE Iran): Implications for the Eocene magmatic flare-up in Central Iran. Lithos 248–251, 517–535. https://doi.org/10.1016/j.lithos.2016.01.019

Mohammadi, A., Burg, J.-P., Bouilhol, P., Ruh, J., 2016. U-Pb geochronology and geochemistry of Zahedan and Shah Kuh plutons, southeast Iran: Implication for closure of the South Sistan suture zone. Lithos 248, 293–308. https://doi.org/10.1016/j.lithos.2016.02.003

Nabatian, G., Ghaderi, M., Corfu, F., Neubauer, F., Bernroider, M., Prokofiev, V., Honarmand, M., 2014a. Geology, alteration, age, and origin of iron oxide–apatite deposits in Upper Eocene quartz monzonite, Zanjan district, NW Iran. Miner. Depos. 49, 217–234. https://doi.org/10.1007/s00126-013-0484-1

Nabatian, G., Ghaderi, M., Neubauer, F., Honarmand, M., Liu, X., Dong, Y., Jiang, S., von Quadt, A., Bernroider, M., 2014b. Petrogenesis of Tarom high-potassic granitoids in the Alborz – Azarbaijan belt, Iran: Geochemical, U-Pb zircon and Sr-Nd-Pb isotopic constraints. Lithos 184–187, 324–345. https://doi.org/10.1016/j.lithos.2013.11.002

Nabatian, G., Jiang, S., Honarmand, M., Neubauer, F., 2016. Zircon U-Pb ages, geochemical and Sr-Nd-Pb-Hf isotopic constraints on petrogenesis of the Tarom-Olya pluton, Alborz magmatic belt, NW Iran. Lithos 244, 43–58. https://doi.org/10.1016/j.lithos.2015.11.020

Nazarinia, A., Mortazavi, M., Arvin, M., Hu, R., Zhao, C., Poosti, M., 2018. U-Pb zircon dating, Sr-Nd isotope and petrogenesis of Sarduiyeh granitoid in SE of the UDMA, Iran: implication for the source origin and magmatic evolution. Int. Geol. Rev. https://doi.org/10.1080/00206814.2018.1514668

Nouri, F., Azizi, H., Golonka, J., Asahara, Y., Orihashi, Y., Yamamoto, K., Tsuboi, M., Anma, R., 2016. Age and petrogenesis of Na-rich felsic rocks in western Iran: Evidence for closure of the southern branch of the Neo-Tethys in the Late Cretaceous. Tectonophysics 671, 151–172.

Nouri, F., Azizi, H., Stern, R.J., Asahara, Y., Khodaparast, S., Madanipour, S., Yamamoto, K., 2018. Zircon U-Pb dating, geochemistry and evolution of the Late Eocene Saveh magmatic complex, central Iran: Partial melts of sub-continental lithospheric mantle and magmatic differentiation. Lithos 314–315, 274–292. https://doi.org/10.1016/j.lithos.2018.06.013

Pang, K.-N., Chung, S.-L., Hossein, M., Li, X.-H., Lee, H.-Y., Lin, T.-H., Chiu, H.-Y., 2016. New age and geochemical constraints on the origin of Quaternary adakite-like lavas in the Arabia-Eurasia collision zone. Lithos 264, 348–359. https://doi.org/10.1016/j.lithos.2016.08.042

Pang, K.-N., Chung, S.-L., Zarrinkoub, M.H., Mohammadi, S.S., Yang, H.-M., Chu, C.-H., Lee, H.-Y., Lo, C.-H., 2012. Age, geochemical characteristics and petrogenesis of Late Cenozoic intraplate alkali basalts in the Lut-Sistan region, eastern Iran. Chem. Geol. 306–307, 40–53. https://doi.org/10.1016/j.chemgeo.2012.02.020

Rabiee, A., Rossetti, F., Asahara, Y., Azizi, H., Lucci, F., Lustrino, M., Nozaem, R., 2020. Long-lived, Eocene-Miocene stationary magmatism in NW Iran along a transform plate boundary. Gondwana Res. 85, 237–262. https://doi.org/10.1016/j.gr.2020.03.014

Rabiee, A., Rossetti, F., Tecce, F., Asahara, Y., Azizi, H., Glodny, J., Lucci, F., Nozaem, R., Opitz, J., Selby, D., 2019. Multiphase magma intrusion, ore-enhancement and hydrothermal carbonatisation in the Siah-Kamar porphyry Mo deposit, Urumieh-Dokhtar magmatic zone, NW Iran. Ore Geol. Rev. 110, 102930. https://doi.org/10.1016/j.oregeorev.2019.05.016

Rossetti, F., Nasrabady, M., Theye, T., Gerdes, A., Monié, P., Lucci, F., Vignaroli, G., 2014. Adakite differentiation and emplacement in a subduction channel: The late Paleocene Sabzevar magmatism (NE Iran). Bull. Geol. Soc. Am. 126, 317–343. https://doi.org/10.1130/B30913.1

Sarjoughian, F., Kananian, A., 2017. Zircon U-Pb geochronology and emplacement history of intrusive rocks in the Ardestan section, central Iran. Geol. Acta 15, 25–36. https://doi.org/10.1344/GeologicaActa2017.15.1.3

Sepidbar, F., Ao, S., Palin, R.M., Li, Q.-L., Zhang, Z., 2019a. Origin, age and petrogenesis of barren (low-grade) granitoids from the Bezenjan-Bardsir magmatic complex, southeast of the Urumieh-Dokhtar magmatic belt, Iran. Ore Geol. Rev. 104, 132–147. https://doi.org/10.1016/j.oregeorev.2018.10.008

Sepidbar, F., Mirnejad, H., Ma, C., Moghadam, H.S., 2018. Identification of Eocene-Oligocene magmatic pulses associated with flare-up in east Iran: Timing and sources. Gondwana Res. 57, 141–156. https://doi.org/10.1016/j.gr.2018.01.008

Sepidbar, F., Shafaii Moghadam, H., Zhang, L., Li, J.W., Ma, J., Stern, R.J., Lin, C., 2019b. Across-arc geochemical variations in the Paleogene magmatic belt of Iran. Lithos 344–345, 280–296. https://doi.org/10.1016/j.lithos.2019.06.022

Shafaii Moghadam, H., Li, Q.L., Li, X.H., Stern, R.J., Levresse, G., Santos, J.F., Lopez Martinez, M., Ducea, M.N., Ghorbani, G., Hassannezhad, A., 2020. Neotethyan Subduction Ignited the Iran Arc and Backarc Differently. J. Geophys. Res. Solid Earth 125, 1–30. https://doi.org/10.1029/2019JB018460

Shafaroudi, A.M., Karimpour, M.H., Stern, C.R., 2014. The Khopik porphyry copper prospect, Lut Block, Eastern Iran: Geology, alteration and mineralization, fluid inclusion, and oxygen isotope studies. Ore Geol. Rev. https://doi.org/10.1016/j.oregeorev.2014.04.015

Shahbazi, H., Siebel, W., Pourmoafee, M., Ghorbani, M., Sepahi, A.A., Shang, C.K., Vousoughi Abedini, M., 2010. Geochemistry and U-Pb zircon geochronology of the Alvand plutonic complex in Sanandaj-Sirjan Zone (Iran): New evidence for Jurassic magmatism. J. Asian Earth Sci. 39, 668–683. https://doi.org/10.1016/j.jseaes.2010.04.014

Siani, M.G., Mehrabi, B., Azizi, H., Wilkinson, C.M., Ganerød, M., 2015. Geochemistry and geochronology of the volcano-plutonic rocks associated with the Glojeh epithermal gold mineralization, NW Iran. Open Geosci. 7, 207–222. https://doi.org/10.1515/geo-2015-0024

Simmonds, V., 2019. Characteristics and timing of the Cu–Mo mineralization in the Kighal porphyry stock, NW Iran: Implications for the timing of porphyry Cu-related magmatism in Iran and southern Armenia. Ore Geol. Rev. 113, 103108. https://doi.org/10.1016/j.oregeorev.2019.103108

Simmonds, V., Moazzen, M., 2015. Re – Os dating of molybdenites from Oligocene Cu – Mo – Au mineralized veins in the Qarachilar area, Qaradagh batholith (northwest Iran): implications for understanding Cenozoic mineralization in South Armenia, Nakhchivan, and Iran. Int. Geol. Rev. 57, 290–304. https://doi.org/10.1080/00206814.2014.1003339

Simmonds, V., Moazzen, M., Mathur, R., 2016. Investigation on the age of mineralization in the Sungun porphyry Cu-Mo deposit, NW Iran with a regional metallogenic perspective. EGU Gen. Assem. 18, 6335.

Verdel, C., Wernicke, B.P., Hassanzadeh, J., Guest, B., 2011. A Paleogene extensional arc flare-up in Iran. Tectonics 30, 1–20. https://doi.org/10.1029/2010TC002809

Vincent, S.J., Allen, M.B., Ismail-Zadeh, A.D., Flecker, R., Foland, K.A., Simmons, M.D., 2005. Insights from the Talysh of Azerbaijan into the Paleogene evolution of the South Caspian region. Geol. Soc. Am. Bull. 117, 1513–1533. https://doi.org/10.1130/B25690.1

Whitechurch, H., Omrani, J., Agard, P., Humbert, F., Montigny, R., Jolivet, L., 2013. Evidence for Paleocene–Eocene evolution of the foot of the Eurasian margin (Kermanshah ophiolite, SW Iran) from back-arc to arc: Implications for regional geodynamics and obduction. Lithos 182–183, 11–32. https://doi.org/10.1016/j.lithos.2013.07.017

Yeganehfar, H., Ghorbani, M.R., Shinjo, R., Ghaderi, M., 2013. Magmatic and geodynamic evolution of Urumieh–Dokhtar basic volcanism, Central Iran: major, trace element, isotopic, and geochronologic implications. Int. Geol. Rev. 55, 767–786. https://doi.org/10.1080/00206814.2012.752554
