# Supplementary material for: Exploring a link between the Middle Eocene Climatic Optimum and Neotethys continental arc flare-up
Source: Copernicus journal article supplement (doi:10.5194/cp-17-229-2021), 2021-01-18
Supplement: Supplementary file 27 [file S6_VU101B-A1c.xls]

## Sheet: Summary Table
	Relative Abundances			36Ar [fA]	%1s	37Ar [fA]	%1s	38Ar [fA]	%1s	39Ar [fA]	%1s	40Ar [fA]	%1s	40(r)/39(k)	± 2s	Age	± 2s	40Ar(r)	39Ar(k)	K/Ca	± 2s		Procedure Blanks		36Ar [fA]	1s	37Ar [fA]	1s	38Ar [fA]	1s	39Ar [fA]	1s	40Ar [fA]	1s		Sample Parameters		Sample	Material	Location	Analyst	Standard	%1s	J	%1s	MDF	%1s	Volume Ratio	Sensitivity
																(Ma)		(%)	(%)																							(in Ma)							(mol/volt)
	12_VU101B-A1	8		0.0185466	2.36729	0.728395	1.36562	0.00532982	4.72986	0.150625	0.544526	6.805	0.276006	8.82557	1.76835	48.93	9.67405	19.4713	0.905296	0.0886304	0.00260723		12_VU101B-A1	8	0.0174489	0.0001547	0.0056883	9.02e-05	0.0071514	0.0001239	0.0038996	0.0001368	5.30661	0.0096519		12_VU101B-A1	8	12_VU101B-A1	groundmass	AZ16A	Klaudia Kuiper	28.201	0.08	0.0030679	0.1	0.971118	0.2	1	1e-13
	13_VU101B-A1	11		0.00549026	7.16522	1.60851	1.21132	0.0078713	2.68942	0.560426	0.575641	6.28141	0.691382	8.52527	0.458496	47.2865	2.51053	75.9153	3.37278	0.149528	0.00401221		13_VU101B-A1	11	0.0174489	0.0001547	0.0056883	9.02e-05	0.0071514	0.0001239	0.0038996	0.0001368	5.30661	0.0096519		13_VU101B-A1	11	13_VU101B-A1	groundmass	AZ16A	Klaudia Kuiper	28.201	0.08	0.0030679	0.1	0.971118	0.2	1	1e-13
	14_VU101B-A1	14		0.00193529	12.6617	1.79788	1.13028	0.0119992	1.94924	0.928557	0.26394	7.72275	0.283333	7.85672	0.169893	43.6221	0.93213	94.3434	5.5918	0.221794	0.00514902		14_VU101B-A1	14	0.0174489	0.0001547	0.0056883	9.02e-05	0.0071514	0.0001239	0.0038996	0.0001368	5.30661	0.0096519		14_VU101B-A1	14	14_VU101B-A1	groundmass	AZ16A	Klaudia Kuiper	28.201	0.08	0.0030679	0.1	0.971118	0.2	1	1e-13
	16_VU101B-A1	80	4	0.0118762	2.54654	10.4219	0.900501	0.0409735	0.913514	3.20467	0.283758	26.7713	0.206287	7.51936	0.0790383	41.7702	0.434087	89.8137	19.2815	0.131933	0.0024918		16_VU101B-A1	80	0.017535	0.0001974	0.0058437	0.0001188	0.0077805	0.0001204	0.0040729	0.0001257	5.37429	0.0146509		16_VU101B-A1	80	16_VU101B-A1	groundmass	AZ16A	Klaudia Kuiper	28.201	0.08	0.0030679	0.1	0.971118	0.2	1	1e-13
	17_VU101B-A1	8		0.0262651	2.21005	0.539504	1.93677	0.0222156	1.09092	1.4866	0.255907	20.037	0.18034	8.23325	0.242179	45.6868	1.32723	61.0696	8.96182	1.18457	0.0462838		17_VU101B-A1	8	0.017535	0.0001974	0.0058437	0.0001188	0.0077805	0.0001204	0.0040729	0.0001257	5.37429	0.0146509		17_VU101B-A1	8	17_VU101B-A1	groundmass	AZ16A	Klaudia Kuiper	28.201	0.08	0.0030679	0.1	0.971118	0.2	1	1e-13
	18_VU101B-A1	11		0.0046941	6.64284	1.11409	1.50119	0.0481271	1.09895	3.98944	0.213351	31.9016	0.1127	7.6678	0.0597997	42.5853	0.328281	95.8714	24.0514	1.53949	0.0466861		18_VU101B-A1	11	0.017535	0.0001974	0.0058437	0.0001188	0.0077805	0.0001204	0.0040729	0.0001257	5.37429	0.0146509		18_VU101B-A1	11	18_VU101B-A1	groundmass	AZ16A	Klaudia Kuiper	28.201	0.08	0.0030679	0.1	0.971118	0.2	1	1e-13
	20_VU101B-A1	14	4	0.00264045	16.5949	0.927247	1.31565	0.0344776	0.946424	2.74758	0.273506	21.1312	0.216323	7.43139	0.108785	41.287	0.59762	96.6043	16.5638	1.27387	0.0342362		20_VU101B-A1	14	0.0173878	0.0002972	0.0057583	9.75e-05	0.0076889	0.0001411	0.0052422	0.0001568	5.35763	0.017169		20_VU101B-A1	14	20_VU101B-A1	groundmass	AZ16A	Klaudia Kuiper	28.201	0.08	0.0030679	0.1	0.971118	0.2	1	1e-13
	21_VU101B-A1	80	4	0.00618796	6.93103	1.70299	1.00638	0.0446191	1.04365	3.52883	0.254119	27.9339	0.205154	7.43198	0.088065	41.2902	0.48379	93.8562	21.2715	0.890727	0.0184912		21_VU101B-A1	80	0.0173878	0.0002972	0.0057583	9.75e-05	0.0076889	0.0001411	0.0052422	0.0001568	5.35763	0.017169		21_VU101B-A1	80	21_VU101B-A1	groundmass	AZ16A	Klaudia Kuiper	28.201	0.08	0.0030679	0.1	0.971118	0.2	1	1e-13
			S	0.0776359	1.47378	18.8405	0.544672	0.215613	0.455593	16.5967	0.108386	148.584	0.0788885
	Information on Analysis and Constants Used in Calculations									Results		40(a)/36(a)	± 2s	40(r)/39(k)	± 2s	Age	± 2s	MSWD	39Ar(k)	K/Ca	± 2s
																(Ma)			(%,n)
	Sample = 12_VU101B-A1				Age Equations = Min et al. (2000)					Age Plateau				7.46929	0.0613143	41.4952	0.346648	1.40422	57.1169	0.151307	0.182154
	Material = groundmass				Negative Intensities = Allowed										0.00820885		0.00835392	0.245559	3
	Location = AZ16A				Decay Constant 40K = 5.460 ± 0.053 E-10 1/a					Full External Error							0.928616	3	2σ Confidence Limit
	Analyst = Klaudia Kuiper				Decay Constant 39Ar = 2.940 ± 0.016 E-07 1/h					Analytical Error							0.336796	1.185	Error Magnification
	Project = VU101				Decay Constant 37Ar = 8.230 ± 0.012 E-04 1/h
	Mass Discrimination Law = LIN				Decay Constant 36Cl = 2.257 ± 0.015 E-06 1/a					Total Fusion Age				7.6505	0.0466429	42.4903	0.269494		8	0.3785	0.00420413
	Irradiation = VU101				Decay Activity 40K(EC,β⁺) = 3.310 ± 0.030 1/gs										0.00609671		0.00634247
	J = 0.00306790 ± 0.00000307				Decay Activity 40K(β⁻) = 27.890 ± 0.150 1/gs					Full External Error							0.922217
	FCs = 28.201 ± 0.023 Ma				Atmospheric Ratio 40/36(a) = 298.56 ± 0.31					Analytical Error							0.256067
	IGSN = Undefined				Atmospheric Ratio 38/36(a) = 0.1885 ± 0.0003
	Preferred Age = Undefined				Production Ratio 39/37(ca) = 0.000673 ± 0.000004					Normal Isochron No Convergence		339.994	70.3752	7.38983	0.151336	41.0587	0.835436	0.372311	57.1169
	Classification = Undefined				Production Ratio 36/37(ca) = 0.000264 ± 0.000002								0.20699		0.020479		0.0203474	0.541747	3
	Experiment Type = Undefined				Production Ratio 40/39(k) = 0.000860 ± 0.000070					Full External Error							1.19361	3.82843	2σ Confidence Limit
	Extraction Method = Undefined				Production Ratio 38/39(k) = 0.012110 ± 0.000030					Analytical Error							0.83148	1	Error Magnification
	Heating = 45 sec				Production Ratio 36/38(cl) = 262.80 ± 1.71												100		Number of Iterations
	Isolation = 5.00 min				Scaling Ratio K/Ca = 0.430												7.4006e-05		Convergence
	Instrument = HELIX				Abundance Ratio 40K/K = 1.1700 ± 0.0100 E-04
	Lithology = Undefined				Atomic Weight K = 39.0983 ± 0.0001 g					Inverse Isochron Overestimated Error		350.27	71.3623	7.36684	0.15436	40.9324	0.852008	0.261009	57.1169
	Lat-Lon = Undefined - Undefined												0.203735		0.0209534		0.020815	0.609428	3
	Feature = Undefined									Full External Error							1.20344	3.82843	2σ Confidence Limit
										Analytical Error							0.848154	1	Error Magnification
																	3		Number of Iterations
																	7.91326e-07		Convergence
																	0.0777495		Spreading Factor
[truncated: 39 more columns]

## Sheet: Hidden Data
Double Line Plot Age Plateau			Double Line Plot K/Ca Plateau			X-Y Plot Normal Isochron		X-Y Plot Inverse Isochron		Error Ellipses Normal Isochron		Error Ellipses Inverse Isochron
Ar39k%	Line 1	Line 2	Ar39k%	Line 1	Line 2	X-axis	Y-axis	X-axis	Y-axis	X-axis	Y-axis	X-axis	Y-axis
0	39.256	58.6041	0	0.0860231	0.0912376	8.17982	370.752	0.0220628	0.00269722			0.0223329	0.00270595
0.905296	39.256	58.6041	0.905296	0.0860231	0.0912376	110.421	1239.93	0.0890542	0.0008065			0.0223247	0.00267211
0.905296	49.797	44.7759	0.905296	0.15354	0.145516	634.949	5287.17	0.120092	0.000189137			0.0222988	0.00263998
4.27808	49.797	44.7759	4.27808	0.15354	0.145516	350.442	2933.66	0.119456	0.000340871			0.0222567	0.00261175
4.27808	42.6899	44.5542	4.27808	0.216645	0.226943	56.8942	766.984	0.0741791	0.00130381			0.0222015	0.00258934
9.86988	42.6899	44.5542	9.86988	0.216645	0.226943	906.524	7249.61	0.125045	0.000137938			0.0221368	0.00257429
9.86988	42.2043	41.3361	9.86988	0.134425	0.129441	1146.75	8820.48	0.130009	0.000113373			0.022067	0.00256762
29.1514	42.2043	41.3361	29.1514	0.134425	0.129441	614.779	4867.58	0.126301	0.000205441			0.021997	0.00256978
29.1514	44.3595	47.014	29.1514	1.13828	1.23085							0.0219314	0.00258062
38.1132	44.3595	47.014	38.1132	1.13828	1.23085							0.0218748	0.00259941
38.1132	42.9136	42.257	38.1132	1.58618	1.49281							0.021831	0.00262487
62.1646	42.9136	42.257	62.1646	1.58618	1.49281							0.021803	0.00265525
62.1646	40.6894	41.8846	62.1646	1.23963	1.3081							0.0217928	0.0026885
78.7285	40.6894	41.8846	78.7285	1.23963	1.3081							0.0218009	0.00272234
78.7285	41.774	40.8065	78.7285	0.909218	0.872236							0.0218268	0.00275447
100	41.774	40.8065	100	0.909218	0.872236							0.0218689	0.0027827
												0.0219242	0.0028051
												0.0219889	0.00282016
												0.0220586	0.00282683
												0.0221287	0.00282467
												0.0221942	0.00281383
												0.0222508	0.00279504
												0.0222946	0.00276958
												0.0223226	0.0027392
												0.0223329	0.00270595
												0.0906579	0.000815117
												0.0906035	0.000782347
												0.0904434	0.000751223
												0.0901887	0.000723867
												0.0898567	0.000702141
												0.0894699	0.000687527
												0.0890549	0.000681022
												0.0886398	0.000683067
												0.088253	0.000693524
												0.0879207	0.00071168
												0.0876657	0.000736298
												0.0875053	0.0007657
												0.0874505	0.000797882
												0.087505	0.000830652
												0.087665	0.000861776
												0.0879198	0.000889133
												0.0882518	0.000910858
												0.0886385	0.000925472
												0.0890535	0.000931978
												0.0894686	0.000929933
												0.0898555	0.000919476
												0.0901877	0.000901319
												0.0904427	0.000876702
												0.0906031	0.000847299
												0.0906579	0.000815117
												0.121023	0.000189925
												0.120991	0.000173465
												0.120898	0.000158074
												0.12075	0.000144799
												0.120558	0.000134546
												0.120333	0.000128014
												0.120092	0.000125647
												0.119851	0.000127606
												0.119627	0.000133759
												0.119434	0.000143686
												0.119286	0.00015671
												0.119193	0.000171944
												0.119162	0.000188349
												0.119193	0.000204809
												0.119286	0.0002202
												0.119434	0.000233475
												0.119627	0.000243728
												0.119851	0.00025026
												0.120092	0.000252628
												0.120333	0.000250668
												0.120558	0.000244515
												0.12075	0.000234589
												0.120898	0.000221564
												0.120991	0.00020633
												0.121023	0.000189925
												0.120295	0.000341698
												0.120266	0.000335784
												0.120183	0.000330218
												0.120049	0.000325377
												0.119875	0.000321592
												0.119673	0.000319121
												0.119456	0.000318133
												0.119238	0.000318694
												0.119036	0.000320766
												0.118862	0.000324208
												0.118729	0.000328786
												0.118645	0.000334188
												0.118616	0.000340044
												0.118645	0.000345958
												0.118729	0.000351524
												0.118862	0.000356365
												0.119036	0.00036015
												0.119238	0.000362621
												0.119456	0.000363609
												0.119673	0.000363048
												0.119875	0.000360976
												0.120049	0.000357534
												0.120183	0.000352956
												0.120266	0.000347554
												0.120295	0.000341698
												0.0746437	0.00130656
												0.0746279	0.00129144
												0.0745816	0.00127716
												0.0745079	0.00126469
												0.0744117	0.00125489
												0.0742997	0.00124843
												0.0741795	0.00124574
												0.0740592	0.001247
												0.0739472	0.00125214
												0.0738509	0.0012608
												0.073777	0.00127239
												0.0737305	0.00128612
												0.0737146	0.00130106
												0.0737303	0.00131618
												0.0737767	0.00133046
												0.0738504	0.00134292
												0.0739466	0.00135272
												0.0740586	0.00135919
												0.0741788	0.00136188
												0.074299	0.00136061
												0.0744111	0.00135547
												0.0745074	0.00134681
												0.0745813	0.00133523
												0.0746278	0.0013215
												0.0746437	0.00130656
												0.125648	0.000138084
												0.125628	0.000133018
												0.125567	0.000128287
												0.125471	0.000124214
												0.125346	0.000121076
												0.125201	0.000119087
												0.125045	0.000118383
												0.124888	0.000119012
												0.124743	0.00012093
												0.124618	0.000124008
												0.124522	0.000128035
												0.124462	0.000132737
												0.124441	0.000137793
												0.124462	0.000142859
												0.124522	0.00014759
												0.124618	0.000151663
												0.124743	0.000154801
												0.124888	0.00015679
												0.125045	0.000157494
												0.125201	0.000156865
												0.125346	0.000154947
												0.125471	0.000151869
												0.125567	0.000147842
												0.125628	0.00014314
												0.125648	0.000138084
												0.130916	0.000113677
												0.130885	0.000102931
												0.130795	9.28966e-05
												0.130651	8.42574e-05
												0.130463	7.76023e-05
												0.130244	7.33849e-05
												0.130009	7.18925e-05
												0.129775	7.3227e-05
												0.129556	7.72973e-05
												0.129368	8.38261e-05
												0.129224	9.23685e-05
												0.129133	0.000102342
												0.129103	0.000113068
												0.129133	0.000123814
												0.129224	0.000133848
												0.129368	0.000142488
												0.129556	0.000149143
												0.129775	0.00015336
												0.130009	0.000154853
												0.130244	0.000153518
												0.130463	0.000149448
												0.130651	0.000142919
												0.130795	0.000134377
												0.130885	0.000124403
												0.130916	0.000113678
												0.127126	0.000205971
												0.127098	0.000198002
												0.127015	0.00019054
												0.126884	0.000184093
												0.126713	0.000179101
												0.126514	0.000175905
												0.126301	0.000174721
												0.126087	0.00017563
												0.125888	0.000178571
												0.125717	0.000183343
												0.125586	0.000189621
												0.125504	0.000196978
												0.125475	0.000204911
												0.125504	0.00021288
												0.125586	0.000220342
												0.125717	0.000226788
												0.125888	0.00023178
												0.126087	0.000234977
												0.126301	0.000236161
												0.126514	0.000235251
												0.126713	0.00023231
												0.126884	0.000227538
												0.127015	0.00022126
												0.127098	0.000213904
												0.127126	0.000205971
