# Supplementary material for: Exploring a link between the Middle Eocene Climatic Optimum and Neotethys continental arc flare-up
Source: Copernicus journal article supplement (doi:10.5194/cp-17-229-2021), 2021-01-18
Supplement: Supplementary file 28 [file S7_VU101B-A1da.xls]

## Sheet: Summary Table
	Relative Abundances			36Ar [fA]	%1s	37Ar [fA]	%1s	38Ar [fA]	%1s	39Ar [fA]	%1s	40Ar [fA]	%1s	40(r)/39(k)	± 2s	Age	± 2s	40Ar(r)	39Ar(k)	K/Ca	± 2s		Procedure Blanks		36Ar [fA]	1s	37Ar [fA]	1s	38Ar [fA]	1s	39Ar [fA]	1s	40Ar [fA]	1s		Sample Parameters		Sample	Material	Location	Analyst	Standard	%1s	J	%1s	MDF	%1s	Volume Ratio	Sensitivity
																(Ma)		(%)	(%)																							(in Ma)							(mol/volt)
	30_VU101B-A1A	10		0.112647	0.717522	0.247217	12.6048	0.0241271	1.2749	-0.463213	8.20382	33.9809	0.0614282	-0.798462	1.06441	-4.49198	5.9955	1.08882	-0.161378	-0.805984	0.242404		30_VU101B-A1A	10	0.0194515	8.21e-05	0.0075518	6.03e-05	0.0067959	0.0001012	0.628378	0.0362655	5.14447	0.0060983		30_VU101B-A1A	10	30_VU101B-A1a	groundmass	AZ16A	Klaudia Kuiper	28.201	0.08	0.0030679	0.1	0.973437	0.13	1	1e-13
	31_VU101B-A1A	20		0.47968	0.607046	15.6238	1.0585	0.679717	0.323385	52.6494	0.158143	544.054	0.0359776	7.63746	0.0419759	42.4187	0.230455	73.8947	18.3322	1.44873	0.0310103		31_VU101B-A1A	20	0.0194515	8.21e-05	0.0075518	6.03e-05	0.0067959	0.0001012	0.628378	0.0362655	5.14447	0.0060983		31_VU101B-A1A	20	31_VU101B-A1a	groundmass	AZ16A	Klaudia Kuiper	28.201	0.08	0.0030679	0.1	0.973437	0.13	1	1e-13
	33_VU101B-A1A	60		0.137993	0.82649	27.0064	0.970678	1.29605	0.290636	112.287	0.134181	844.277	0.0324156	7.17124	0.0207795	39.8573	0.114243	95.3609	39.0992	1.78757	0.0350332		33_VU101B-A1A	60	0.0269479	0.0002424	0.0082837	0.0001115	0.0088587	0.0001085	0.0245526	0.0044051	5.58019	0.0043474		33_VU101B-A1A	60	33_VU101B-A1a	groundmass	AZ16A	Klaudia Kuiper	28.201	0.08	0.0030679	0.1	0.973437	0.13	1	1e-13
	34_VU101B-A1A	45	4	0.0472801	1.23903	20.6232	1.00492	0.721366	0.333675	62.5131	0.137983	452.029	0.0412396	7.03185	0.0210767	39.0908	0.115925	97.2249	21.7662	1.30313	0.0264366		34_VU101B-A1A	45	0.0269479	0.0002424	0.0082837	0.0001115	0.0088587	0.0001085	0.0245526	0.0044051	5.58019	0.0043474		34_VU101B-A1A	45	34_VU101B-A1a	groundmass	AZ16A	Klaudia Kuiper	28.201	0.08	0.0030679	0.1	0.973437	0.13	1	1e-13
	36_VU101B-A1A	60	4	0.0290923	2.13084	7.25425	1.2341	0.194189	0.568774	16.692	0.147832	125.655	0.03617	7.04297	0.0309445	39.152	0.170194	93.5312	5.8115	0.989138	0.0245885		36_VU101B-A1A	60	0.0269479	0.0002424	0.0082837	0.0001115	0.0088587	0.0001085	0.0245526	0.0044051	5.58019	0.0043474		36_VU101B-A1A	60	36_VU101B-A1a	groundmass	AZ16A	Klaudia Kuiper	28.201	0.08	0.0030679	0.1	0.973437	0.13	1	1e-13
	43_VU101B-A1A	180	4	0.0211145	2.30003	19.7667	0.962536	0.494106	0.379295	43.5214	0.139705	309.847	0.0410165	7.01165	0.0215259	38.9797	0.118403	98.4562	15.1523	0.946462	0.0184111		43_VU101B-A1A	180	0.025672	0.0002216	0.0082936	0.0001159	0.0084064	9.08e-05	0.0009146	0.0039854	5.21912	0.0049701		43_VU101B-A1A	180	43_VU101B-A1a	groundmass	AZ16A	Klaudia Kuiper	28.201	0.08	0.0030679	0.1	0.973437	0.13	1	1e-13
			S	0.827807	0.407807	90.5216	0.474133	3.40956	0.159679	287.2	0.0720538	2309.84	0.0176716
	Information on Analysis and Constants Used in Calculations									Results		40(a)/36(a)	± 2s	40(r)/39(k)	± 2s	Age	± 2s	MSWD	39Ar(k)	K/Ca	± 2s
																(Ma)			(%,n)
	Sample = 30_VU101B-A1A				Age Equations = Min et al. (2000)					Age Plateau				7.02598	0.0173644	39.0585	0.122864	1.64437	42.7299	1.04272	0.206851
	Material = groundmass				Negative Intensities = Allowed										0.00247146		0.00314564	0.193134	3
	Location = AZ16A				Decay Constant 40K = 5.460 ± 0.053 E-10 1/a					Full External Error							0.820569	3	2σ Confidence Limit
	Analyst = Klaudia Kuiper				Decay Constant 39Ar = 2.940 ± 0.016 E-07 1/h					Analytical Error							0.0955087	1.28233	Error Magnification
	Project = VU101				Decay Constant 37Ar = 8.230 ± 0.012 E-04 1/h
	Mass Discrimination Law = LIN				Decay Constant 36Cl = 2.257 ± 0.015 E-06 1/a					Total Fusion Age				7.20759	0.012907	40.0571	0.106367		6	1.36398	0.0130828
	Irradiation = VU101				Decay Activity 40K(EC,β⁺) = 3.310 ± 0.030 1/gs										0.00179075		0.00265538
	J = 0.00306790 ± 0.00000307				Decay Activity 40K(β⁻) = 27.890 ± 0.150 1/gs					Full External Error							0.838658
	FCs = 28.201 ± 0.023 Ma				Atmospheric Ratio 40/36(a) = 298.56 ± 0.31					Analytical Error							0.0709529
	IGSN = Undefined				Atmospheric Ratio 38/36(a) = 0.1885 ± 0.0003
	Preferred Age = Undefined				Production Ratio 39/37(ca) = 0.000673 ± 0.000004					Normal Isochron		329.264	32.5757	7.00161	0.027684	38.9245	0.170653	1.1327	42.7299
	Classification = Undefined				Production Ratio 36/37(ca) = 0.000264 ± 0.000002								0.0989349		0.00395395		0.00438421	0.287199	3
	Experiment Type = Undefined				Production Ratio 40/39(k) = 0.000860 ± 0.000070					Full External Error							0.826369	3.82843	2σ Confidence Limit
	Extraction Method = Undefined				Production Ratio 38/39(k) = 0.012110 ± 0.000030					Analytical Error							0.152281	1.06429	Error Magnification
	Heating = 45 sec				Production Ratio 36/38(cl) = 262.80 ± 1.71												1		Number of Iterations
	Isolation = 5.00 min				Scaling Ratio K/Ca = 0.430												2.61547e-05		Convergence
	Instrument = HELIX				Abundance Ratio 40K/K = 1.1700 ± 0.0100 E-04
	Lithology = Undefined				Atomic Weight K = 39.0983 ± 0.0001 g					Inverse Isochron		322.017	30.5144	7.00888	0.0259631	38.9644	0.162297	0.823874	42.7299
	Lat-Lon = Undefined - Undefined												0.0947602		0.00370432		0.00416526	0.36405	3
	Feature = Undefined									Full External Error							0.825491	3.82843	2σ Confidence Limit
										Analytical Error							0.142811	1	Error Magnification
																	3		Number of Iterations
																	3.59972e-05		Convergence
																	0.0534011		Spreading Factor
[truncated: 39 more columns]

## Sheet: Hidden Data
Double Line Plot Age Plateau			Double Line Plot K/Ca Plateau			X-Y Plot Normal Isochron		X-Y Plot Inverse Isochron		Error Ellipses Normal Isochron		Error Ellipses Inverse Isochron
Ar39k%	Line 1	Line 2	Ar39k%	Line 1	Line 2	X-axis	Y-axis	X-axis	Y-axis	X-axis	Y-axis	X-axis	Y-axis
0	-10.4875	1.50352	0	-1.04839	-0.56358	-4.11607	301.847	-0.0136363	0.00331294			-0.0113997	0.00331297
-0.161378	-10.4875	1.50352	-0.161378	-1.04839	-0.56358	110.689	1143.95	0.0967611	0.000874168			-0.0114759	0.00330061
-0.161378	42.6491	42.1882	-0.161378	1.47974	1.41772	857.91	6450.84	0.132992	0.000155019			-0.0116993	0.00328909
18.1708	42.6491	42.1882	18.1708	1.47974	1.41772	1493.93	10803.6	0.13828	9.25616e-05			-0.0120548	0.0032792
18.1708	39.743	39.9715	18.1708	1.75254	1.8226	614.011	4623.03	0.132816	0.000216309			-0.012518	0.00327161
57.2701	39.743	39.9715	57.2701	1.75254	1.8226	2737.02	19489.6	0.140435	5.13094e-05			-0.0130574	0.00326683
57.2701	39.2067	38.9748	57.2701	1.32956	1.27669							-0.0136363	0.00326519
79.0362	39.2067	38.9748	79.0362	1.32956	1.27669							-0.0142152	0.00326681
79.0362	38.9818	39.3222	79.0362	0.964549	1.01373							-0.0147546	0.00327158
84.8477	38.9818	39.3222	84.8477	0.964549	1.01373							-0.0152179	0.00327916
84.8477	39.0981	38.8613	84.8477	0.964873	0.928051							-0.0155733	0.00328904
100	39.0981	38.8613	100	0.964873	0.928051							-0.0157967	0.00330055
												-0.015873	0.00331291
												-0.0157967	0.00332527
												-0.0155733	0.00333679
												-0.0152179	0.00334668
												-0.0147546	0.00335428
												-0.0142152	0.00335905
												-0.0136363	0.00336069
												-0.0130574	0.00335907
												-0.012518	0.00335431
												-0.0120548	0.00334673
												-0.0116993	0.00333684
												-0.0114759	0.00332533
												-0.0113997	0.00331297
												0.097075	0.000874307
												0.0970643	0.000871527
												0.0970329	0.000868926
												0.0969831	0.000866683
												0.096918	0.00086495
												0.0968423	0.000863845
												0.0967611	0.000863443
												0.0966798	0.000863772
												0.0966041	0.00086481
												0.0965391	0.000866485
												0.0964892	0.000868684
												0.0964578	0.000871257
												0.0964471	0.000874028
												0.0964578	0.000876808
												0.0964892	0.000879409
												0.0965391	0.000881652
												0.0966041	0.000883385
												0.0966798	0.00088449
												0.0967611	0.000884892
												0.0968423	0.000884563
												0.096918	0.000883525
												0.096983	0.00088185
												0.0970329	0.000879651
												0.0970643	0.000877078
												0.097075	0.000874307
												0.133359	0.000155042
												0.133347	0.00015434
												0.13331	0.000153684
												0.133252	0.000153118
												0.133176	0.000152683
												0.133087	0.000152406
												0.132992	0.000152308
												0.132897	0.000152394
												0.132808	0.000152659
												0.132732	0.000153085
												0.132674	0.000153643
												0.132637	0.000154294
												0.132625	0.000154995
												0.132637	0.000155697
												0.132674	0.000156354
												0.132732	0.000156919
												0.132808	0.000157355
												0.132897	0.000157631
												0.132992	0.00015773
												0.133087	0.000157643
												0.133176	0.000157378
												0.133252	0.000156952
												0.13331	0.000156395
												0.133347	0.000155743
												0.133359	0.000155042
												0.138679	9.25835e-05
												0.138665	9.19075e-05
												0.138625	9.1276e-05
												0.138562	9.07322e-05
												0.138479	9.0313e-05
												0.138383	9.00471e-05
												0.13828	8.99525e-05
												0.138177	9.00358e-05
												0.138081	9.02911e-05
												0.137998	9.07012e-05
												0.137935	9.12381e-05
												0.137895	9.18652e-05
												0.137882	9.25398e-05
												0.137895	9.32158e-05
												0.137935	9.38472e-05
												0.137998	9.43911e-05
												0.138081	9.48103e-05
												0.138177	9.50762e-05
												0.13828	9.51708e-05
												0.138383	9.50875e-05
												0.138479	9.48321e-05
												0.138562	9.4422e-05
												0.138625	9.38851e-05
												0.138665	9.32581e-05
												0.138679	9.25835e-05
												0.13322	0.000216346
												0.133207	0.000213788
												0.133166	0.000211402
												0.133102	0.00020935
												0.133018	0.000207772
												0.132921	0.000206776
												0.132816	0.00020643
												0.132711	0.000206757
												0.132614	0.000207735
												0.13253	0.000209297
												0.132466	0.000211337
												0.132425	0.000213716
												0.132412	0.000216271
												0.132425	0.000218829
												0.132466	0.000221215
												0.13253	0.000223267
												0.132614	0.000224845
												0.132711	0.000225841
												0.132816	0.000226187
												0.132921	0.00022586
												0.133018	0.000224882
												0.133102	0.00022332
												0.133166	0.00022128
												0.133207	0.000218901
												0.13322	0.000216346
												0.140844	5.13212e-05
												0.14083	5.05031e-05
												0.140789	4.97399e-05
												0.140724	4.90837e-05
												0.14064	4.85791e-05
												0.140541	4.82606e-05
												0.140435	4.81499e-05
												0.140329	4.82545e-05
												0.14023	4.85673e-05
												0.140146	4.90669e-05
												0.140081	4.97194e-05
												0.14004	5.04802e-05
												0.140026	5.12975e-05
												0.14004	5.21156e-05
												0.140081	5.28788e-05
												0.140146	5.3535e-05
												0.14023	5.40396e-05
												0.140329	5.43581e-05
												0.140435	5.44688e-05
												0.140541	5.43642e-05
												0.14064	5.40515e-05
												0.140724	5.35518e-05
												0.140789	5.28994e-05
												0.14083	5.21386e-05
												0.140844	5.13212e-05
