# Supplementary material for: Exploring a link between the Middle Eocene Climatic Optimum and Neotethys continental arc flare-up
Source: Copernicus journal article supplement (doi:10.5194/cp-17-229-2021), 2021-01-18
Supplement: Supplementary file 29 [file S8_VU101B-A1db.xls]

## Sheet: Summary Table
	Relative Abundances			36Ar [fA]	%1s	37Ar [fA]	%1s	38Ar [fA]	%1s	39Ar [fA]	%1s	40Ar [fA]	%1s	40(r)/39(k)	± 2s	Age	± 2s	40Ar(r)	39Ar(k)	K/Ca	± 2s		Procedure Blanks		36Ar [fA]	1s	37Ar [fA]	1s	38Ar [fA]	1s	39Ar [fA]	1s	40Ar [fA]	1s		Sample Parameters		Sample	Material	Location	Analyst	Standard	%1s	J	%1s	MDF	%1s	Volume Ratio	Sensitivity
																(Ma)		(%)	(%)																							(in Ma)							(mol/volt)
	45_VU101B-A1B	10		0.0819529	0.874631	0.0349209	113.466	0.0167582	2.13588	0.14367	5.51507	25.4458	0.0993154	6.8262	3.11389	37.9593	17.1375	3.85351	0.0384328	1.76879	4.01869		45_VU101B-A1B	10	0.0263502	0.0001496	0.0085564	0.0001081	0.0083649	0.000119	0.0003278	0.0055506	5.21924	0.0052493		45_VU101B-A1B	10	45_VU101B-A1b	groundmass	AZ16A	Klaudia Kuiper	28.201	0.08	0.0030679	0.1	0.973437	0.13	1	1e-13
	46_VU101B-A1B	15		0.257428	0.670822	2.25924	2.05429	0.141998	0.498838	8.2635	0.167385	143.857	0.0348698	8.13001	0.129765	45.1209	0.711382	46.6922	2.21051	1.5725	0.0648217		46_VU101B-A1B	15	0.0263502	0.0001496	0.0085564	0.0001081	0.0083649	0.000119	0.0003278	0.0055506	5.21924	0.0052493		46_VU101B-A1B	15	46_VU101B-A1b	groundmass	AZ16A	Klaudia Kuiper	28.201	0.08	0.0030679	0.1	0.973437	0.13	1	1e-13
	48_VU101B-A1B	20		0.371589	0.690891	10.5653	1.0086	0.452435	0.369322	34.5529	0.142976	376.231	0.0323305	7.70261	0.0504815	42.7764	0.277098	70.7258	9.24278	1.40599	0.0286454		48_VU101B-A1B	20	0.0266203	0.0002396	0.0085819	0.0001105	0.0084458	0.0001089	0.0118347	0.0043057	5.25428	0.0047306		48_VU101B-A1B	20	48_VU101B-A1b	groundmass	AZ16A	Klaudia Kuiper	28.201	0.08	0.0030679	0.1	0.973437	0.13	1	1e-13
	49_VU101B-A1B	24		0.222454	0.698903	16.96	1.04311	0.733472	0.346055	61.9136	0.135076	520.06	0.0321883	7.34914	0.0255651	40.8351	0.140478	87.476	16.562	1.56946	0.0330156		49_VU101B-A1B	24	0.0266203	0.0002396	0.0085819	0.0001105	0.0084458	0.0001089	0.0118347	0.0043057	5.25428	0.0047306		49_VU101B-A1B	24	49_VU101B-A1b	groundmass	AZ16A	Klaudia Kuiper	28.201	0.08	0.0030679	0.1	0.973437	0.13	1	1e-13
	51_VU101B-A1B	28		0.104716	0.815057	17.3078	1.00214	0.806444	0.315432	69.9526	0.13539	531.864	0.030554	7.1761	0.0212938	39.884	0.117068	94.367	18.7128	1.73764	0.0351436		51_VU101B-A1B	28	0.0274713	0.0002191	0.0085527	7.87e-05	0.0094176	0.0001387	0.0340644	0.0036736	5.68018	0.004032		51_VU101B-A1B	28	51_VU101B-A1b	groundmass	AZ16A	Klaudia Kuiper	28.201	0.08	0.0030679	0.1	0.973437	0.13	1	1e-13
	52_VU101B-A1B	33		0.0530486	1.33442	15.5456	0.950708	0.749606	0.315296	65.1608	0.139013	476.186	0.0345546	7.08389	0.0213554	39.377	0.11744	96.9195	17.4311	1.8021	0.0346299		52_VU101B-A1B	33	0.0274713	0.0002191	0.0085527	7.87e-05	0.0094176	0.0001387	0.0340644	0.0036736	5.68018	0.004032		52_VU101B-A1B	33	52_VU101B-A1b	groundmass	AZ16A	Klaudia Kuiper	28.201	0.08	0.0030679	0.1	0.973437	0.13	1	1e-13
	54_VU101B-A1B	40		0.0332813	1.49088	15.5853	0.988272	0.667709	0.323024	57.9288	0.136285	417.503	0.0312107	7.05727	0.0204191	39.2306	0.1123	97.9023	15.4961	1.59797	0.0318836		54_VU101B-A1B	40	0.0274713	0.0002191	0.0085527	7.87e-05	0.0094176	0.0001387	0.0340644	0.0036736	5.68018	0.004032		54_VU101B-A1B	40	54_VU101B-A1b	groundmass	AZ16A	Klaudia Kuiper	28.201	0.08	0.0030679	0.1	0.973437	0.13	1	1e-13
	55_VU101B-A1B	50	4	0.0209191	2.67287	11.9319	1.07871	0.408783	0.343128	35.4061	0.143364	253.905	0.0564085	7.02211	0.0236766	39.0372	0.130229	97.8986	9.47081	1.27567	0.0277637		55_VU101B-A1B	50	0.0274713	0.0002191	0.0085527	7.87e-05	0.0094176	0.0001387	0.0340644	0.0036736	5.68018	0.004032		55_VU101B-A1B	50	55_VU101B-A1b	groundmass	AZ16A	Klaudia Kuiper	28.201	0.08	0.0030679	0.1	0.973437	0.13	1	1e-13
	57_VU101B-A1B	70	4	0.0129448	3.97975	9.60178	1.11597	0.230171	0.359067	20.0681	0.141186	144.137	0.0389911	7.02895	0.0257249	39.0748	0.141493	97.8318	5.36753	0.898427	0.0202123		57_VU101B-A1B	70	0.0267247	0.0001134	0.008755	8.86e-05	0.0091904	0.0001187	0.0396883	0.0044534	5.50426	0.0053211		57_VU101B-A1B	70	57_VU101B-A1b	groundmass	AZ16A	Klaudia Kuiper	28.201	0.08	0.0030679	0.1	0.973437	0.13	1	1e-13
	58_VU101B-A1B	150	4	0.0156424	2.15096	10.7172	1.05782	0.235675	0.360523	20.4438	0.138934	147.258	0.0383056	7.01753	0.0225574	39.012	0.124074	97.3903	5.46786	0.819968	0.0174967		58_VU101B-A1B	150	0.0267247	0.0001134	0.008755	8.86e-05	0.0091904	0.0001187	0.0396883	0.0044534	5.50426	0.0053211		58_VU101B-A1B	150	58_VU101B-A1b	groundmass	AZ16A	Klaudia Kuiper	28.201	0.08	0.0030679	0.1	0.973437	0.13	1	1e-13
			S	1.17398	0.326265	110.509	0.365259	4.44305	0.123165	373.834	0.0516505	3036.45	0.0124664
	Information on Analysis and Constants Used in Calculations									Results		40(a)/36(a)	± 2s	40(r)/39(k)	± 2s	Age	± 2s	MSWD	39Ar(k)	K/Ca	± 2s
																(Ma)			(%,n)
	Sample = 45_VU101B-A1B				Age Equations = Min et al. (2000)					Age Plateau Overestimated Error				7.02237	0.0137879	39.0386	0.108254	0.22299	20.3062	0.931675	0.237039
	Material = groundmass				Negative Intensities = Allowed										0.00196343		0.00277301	0.800123	3
	Location = AZ16A				Decay Constant 40K = 5.460 ± 0.053 E-10 1/a					Full External Error							0.818102	3	2σ Confidence Limit
	Analyst = Klaudia Kuiper				Decay Constant 39Ar = 2.940 ± 0.016 E-07 1/h					Analytical Error							0.0758378	1	Error Magnification
	Project = VU101				Decay Constant 37Ar = 8.230 ± 0.012 E-04 1/h
	Mass Discrimination Law = LIN				Decay Constant 36Cl = 2.257 ± 0.015 E-06 1/a					Total Fusion Age				7.20874	0.00989001	40.0634	0.0961114		10	1.45433	0.0107299
	Irradiation = VU101				Decay Activity 40K(EC,β⁺) = 3.310 ± 0.030 1/gs										0.00137195		0.00239898
	J = 0.00306790 ± 0.00000307				Decay Activity 40K(β⁻) = 27.890 ± 0.150 1/gs					Full External Error							0.837548
	FCs = 28.201 ± 0.023 Ma				Atmospheric Ratio 40/36(a) = 298.56 ± 0.31					Analytical Error							0.0543677
	IGSN = Undefined				Atmospheric Ratio 38/36(a) = 0.1885 ± 0.0003
	Preferred Age = Undefined				Production Ratio 39/37(ca) = 0.000673 ± 0.000004					Normal Isochron Overestimated Error		240.394	233.604	7.05462	0.129902	39.216	0.718637	0.223025	20.3062
	Classification = Undefined				Production Ratio 36/37(ca) = 0.000264 ± 0.000002								0.971756		0.0184138		0.0183251	0.636744	3
	Experiment Type = Undefined				Production Ratio 40/39(k) = 0.000860 ± 0.000070					Full External Error							1.08626	3.82843	2σ Confidence Limit
	Extraction Method = Undefined				Production Ratio 38/39(k) = 0.012110 ± 0.000030					Analytical Error							0.714436	1	Error Magnification
	Heating = 45 sec				Production Ratio 36/38(cl) = 262.80 ± 1.71												1		Number of Iterations
	Isolation = 5.00 min				Scaling Ratio K/Ca = 0.430												8.3671e-07		Convergence
	Instrument = HELIX				Abundance Ratio 40K/K = 1.1700 ± 0.0100 E-04
	Lithology = Undefined				Atomic Weight K = 39.0983 ± 0.0001 g					Inverse Isochron Overestimated Error		240.429	229.873	7.05465	0.129861	39.2162	0.718413	0.225148	20.3062
	Lat-Lon = Undefined - Undefined												0.956094		0.0184079		0.0183193	0.635145	3
	Feature = Undefined									Full External Error							1.08611	3.82843	2σ Confidence Limit
										Analytical Error							0.71421	1	Error Magnification
																	4		Number of Iterations
																	1.86834e-05		Convergence
																	0.00446848		Spreading Factor
[truncated: 39 more columns]

## Sheet: Hidden Data
Double Line Plot Age Plateau			Double Line Plot K/Ca Plateau			X-Y Plot Normal Isochron		X-Y Plot Inverse Isochron		Error Ellipses Normal Isochron		Error Ellipses Inverse Isochron
Ar39k%	Line 1	Line 2	Ar39k%	Line 1	Line 2	X-axis	Y-axis	X-axis	Y-axis	X-axis	Y-axis	X-axis	Y-axis
0	20.8218	55.0968	0	-2.2499	5.78748	1.75298	310.526	0.00564521	0.00322034			0.00626809	0.00322046
0.0384328	20.8218	55.0968	0.0384328	-2.2499	5.78748	32.1688	560.093	0.0574348	0.00178542			0.00624687	0.00320578
0.0384328	45.8323	44.4095	0.0384328	1.63732	1.50768	93.6708	1020.07	0.0918278	0.000980325			0.00618464	0.00319209
2.24894	45.8323	44.4095	2.24894	1.63732	1.50768	283.986	2385.61	0.119041	0.00041918			0.00608566	0.00318032
2.24894	42.4993	43.0535	2.24894	1.37735	1.43464	698.387	5310.26	0.131517	0.000188315			0.00595666	0.00317129
11.4917	42.4993	43.0535	11.4917	1.37735	1.43464	1331.1	9727.95	0.136833	0.000102797			0.00580643	0.0031656
11.4917	40.9756	40.6946	11.4917	1.60247	1.53644	1985.76	14312.6	0.138742	6.98685e-05			0.00564522	0.00316363
28.0538	40.9756	40.6946	28.0538	1.60247	1.53644	1992.11	14287.4	0.139431	6.99917e-05			0.005484	0.00316554
28.0538	39.767	40.0011	28.0538	1.70249	1.77278	1927.16	13844.5	0.139201	7.22311e-05			0.00533377	0.00317117
46.7666	39.767	40.0011	46.7666	1.70249	1.77278	1594.99	11491.4	0.138798	8.70213e-05			0.00520477	0.00318016
46.7666	39.4944	39.2595	46.7666	1.83673	1.76747							0.00510578	0.00319189
64.1977	39.4944	39.2595	64.1977	1.83673	1.76747							0.00504355	0.00320555
64.1977	39.1183	39.3429	64.1977	1.56609	1.62985							0.00502233	0.00322022
79.6938	39.1183	39.3429	79.6938	1.56609	1.62985							0.00504355	0.0032349
79.6938	39.1675	38.907	79.6938	1.30343	1.24791							0.00510577	0.00324859
89.1646	39.1675	38.907	89.1646	1.30343	1.24791							0.00520476	0.00326036
89.1646	38.9333	39.2163	89.1646	0.878215	0.918639							0.00533376	0.00326939
94.5321	38.9333	39.2163	94.5321	0.878215	0.918639							0.00548398	0.00327508
94.5321	39.1361	38.888	94.5321	0.837465	0.802471							0.0056452	0.00327705
100	39.1361	38.888	100	0.837465	0.802471							0.00580641	0.00327514
												0.00595664	0.00326951
												0.00608564	0.00326052
												0.00618463	0.00324879
												0.00624686	0.00323513
												0.00626809	0.00322046
												0.0576312	0.00178568
												0.0576245	0.00177945
												0.0576049	0.00177362
												0.0575737	0.0017686
												0.057533	0.00176473
												0.0574856	0.00176226
												0.0574348	0.00176138
												0.057384	0.00176213
												0.0573366	0.00176447
												0.0572959	0.00176824
												0.0572647	0.00177317
												0.057245	0.00177895
												0.0572383	0.00178516
												0.057245	0.00179139
												0.0572646	0.00179722
												0.0572958	0.00180224
												0.0573365	0.00180611
												0.0573839	0.00180857
												0.0574347	0.00180946
												0.0574856	0.00180871
												0.057533	0.00180637
												0.0575736	0.0018026
												0.0576049	0.00179766
												0.0576245	0.00179189
												0.0576312	0.00178568
												0.0920971	0.000980466
												0.0920879	0.000976924
												0.092061	0.000973615
												0.0920183	0.000970763
												0.0919625	0.000968563
												0.0918975	0.000967164
												0.0918279	0.000966662
												0.0917582	0.000967091
												0.0916932	0.000968422
												0.0916375	0.000970565
												0.0915947	0.000973372
												0.0915678	0.000976654
												0.0915586	0.000980185
												0.0915678	0.000983726
												0.0915947	0.000987036
												0.0916374	0.000989888
												0.0916932	0.000992088
												0.0917581	0.000993487
												0.0918278	0.000993989
												0.0918975	0.00099356
												0.0919625	0.000992228
												0.0920182	0.000990086
												0.092061	0.000987279
												0.0920879	0.000983997
												0.0920971	0.000980466
												0.119372	0.000419242
												0.11936	0.00041769
												0.119327	0.000416239
												0.119275	0.000414989
												0.119206	0.000414024
												0.119127	0.000413411
												0.119041	0.000413191
												0.118955	0.000413378
												0.118876	0.000413962
												0.118807	0.0004149
												0.118755	0.000416131
												0.118722	0.000417569
												0.11871	0.000419117
												0.118722	0.000420669
												0.118755	0.00042212
												0.118807	0.00042337
												0.118876	0.000424335
												0.118955	0.000424949
												0.119041	0.000425169
												0.119127	0.000424981
												0.119206	0.000424398
												0.119275	0.000423459
												0.119327	0.000422228
												0.11936	0.00042079
												0.119372	0.000419242
												0.131882	0.00018834
												0.131869	0.000187506
												0.131833	0.000186728
												0.131775	0.000186057
												0.131699	0.00018554
												0.131611	0.000185213
												0.131517	0.000185096
												0.131422	0.0001852
												0.131334	0.000185515
												0.131258	0.000186021
												0.1312	0.000186684
												0.131164	0.000187457
												0.131151	0.000188289
												0.131164	0.000189123
												0.1312	0.000189902
												0.131258	0.000190572
												0.131334	0.000191089
												0.131422	0.000191417
												0.131517	0.000191533
												0.131611	0.00019143
												0.131699	0.000191115
												0.131775	0.000190608
												0.131833	0.000189946
												0.131869	0.000189172
												0.131882	0.00018834
												0.137225	0.000102814
												0.137212	0.000102042
												0.137172	0.000101321
												0.13711	0.000100701
												0.137029	0.000100224
												0.136934	9.99217e-05
												0.136833	9.98157e-05
												0.136731	9.99128e-05
												0.136637	0.000100206
												0.136556	0.000100677
												0.136493	0.000101291
												0.136454	0.000102008
												0.136441	0.000102779
												0.136454	0.000103552
												0.136493	0.000104272
												0.136556	0.000104892
												0.136637	0.000105369
												0.136731	0.000105671
												0.136833	0.000105777
												0.136934	0.00010568
												0.137029	0.000105387
												0.13711	0.000104916
												0.137172	0.000104302
												0.137212	0.000103585
												0.137225	0.000102814
												0.13913	6.98782e-05
												0.139117	6.92596e-05
												0.139078	6.86825e-05
												0.139017	6.81862e-05
												0.138936	6.78045e-05
												0.138843	6.75635e-05
												0.138742	6.74796e-05
												0.138642	6.75585e-05
												0.138548	6.77948e-05
												0.138468	6.81724e-05
												0.138406	6.86656e-05
												0.138367	6.92408e-05
												0.138354	6.98587e-05
												0.138367	7.04773e-05
												0.138406	7.10545e-05
												0.138468	7.15508e-05
												0.138548	7.19324e-05
												0.138642	7.21734e-05
												0.138742	7.22574e-05
												0.138843	7.21785e-05
												0.138936	7.19422e-05
												0.139017	7.15646e-05
												0.139078	7.10714e-05
												0.139117	7.04962e-05
												0.13913	6.98782e-05
												0.139861	7.00206e-05
												0.139846	6.88766e-05
												0.139804	6.78085e-05
												0.139735	6.68893e-05
												0.139646	6.61814e-05
												0.139543	6.57332e-05
												0.139431	6.55753e-05
												0.13932	6.57183e-05
												0.139217	6.61525e-05
												0.139128	6.68484e-05
												0.139059	6.77584e-05
												0.139016	6.88207e-05
												0.139002	6.99628e-05
												0.139016	7.11068e-05
												0.139059	7.21749e-05
												0.139128	7.30942e-05
												0.139217	7.3802e-05
												0.13932	7.42502e-05
												0.139431	7.44082e-05
												0.139543	7.42652e-05
												0.139646	7.38309e-05
												0.139735	7.31351e-05
												0.139804	7.2225e-05
												0.139846	7.11627e-05
												0.139861	7.00206e-05
												0.139609	7.22461e-05
												0.139595	7.03915e-05
												0.139554	6.86622e-05
												0.139489	6.71762e-05
												0.139405	6.60346e-05
												0.139306	6.53153e-05
												0.139201	6.50674e-05
												0.139095	6.53076e-05
												0.138997	6.60196e-05
												0.138912	6.71549e-05
												0.138847	6.86362e-05
												0.138807	7.03625e-05
												0.138793	7.22161e-05
												0.138807	7.40707e-05
												0.138847	7.57999e-05
												0.138912	7.7286e-05
												0.138997	7.84275e-05
												0.139095	7.91468e-05
												0.139201	7.93948e-05
												0.139306	7.91546e-05
												0.139405	7.84425e-05
												0.139489	7.73072e-05
												0.139554	7.58259e-05
												0.139595	7.40997e-05
												0.139609	7.22461e-05
												0.139198	8.7039e-05
												0.139185	8.58491e-05
												0.139145	8.4739e-05
												0.139081	8.37845e-05
												0.138998	8.30505e-05
												0.138902	8.25872e-05
												0.138798	8.2426e-05
												0.138694	8.2578e-05
												0.138598	8.30328e-05
												0.138515	8.37594e-05
												0.138451	8.47083e-05
												0.138411	8.58148e-05
												0.138398	8.70036e-05
												0.138411	8.81935e-05
												0.138451	8.93036e-05
												0.138515	9.02581e-05
												0.138598	9.09921e-05
												0.138694	9.14555e-05
												0.138798	9.16166e-05
												0.138902	9.14646e-05
												0.138998	9.10098e-05
												0.139081	9.02832e-05
												0.139145	8.93343e-05
												0.139185	8.82278e-05
												0.139198	8.7039e-05
