# Supplementary material for: Exploring a link between the Middle Eocene Climatic Optimum and Neotethys continental arc flare-up
Source: Copernicus journal article supplement (doi:10.5194/cp-17-229-2021), 2021-01-18
Supplement: Supplementary file 30 [file S9_VU101B-A1f.xls]

## Sheet: Summary Table
	Relative Abundances			36Ar [fA]	%1s	37Ar [fA]	%1s	38Ar [fA]	%1s	39Ar [fA]	%1s	40Ar [fA]	%1s	40(r)/39(k)	± 2s	Age	± 2s	40Ar(r)	39Ar(k)	K/Ca	± 2s		Procedure Blanks		36Ar [fA]	1s	37Ar [fA]	1s	38Ar [fA]	1s	39Ar [fA]	1s	40Ar [fA]	1s		Sample Parameters		Sample	Material	Location	Analyst	Standard	%1s	J	%1s	MDF	%1s	Volume Ratio	Sensitivity
																(Ma)		(%)	(%)																							(in Ma)							(mol/volt)
	16_VU101B-A1C_1	10		0.652657	0.756834	1.55599	9.91669	0.17092	0.473627	3.70617	0.193641	222.682	0.0530848	7.54207	0.806616	41.8949	4.42972	12.549	1.07331	1.02391	0.203115		16_VU101B-A1C_1	10	0.02019	0.0002022	0.0113505	8.96e-05	0.0122153	7.38e-05	0.0235104	0.0002914	4.38469	0.0149345		16_VU101B-A1C_1	10	16_VU101B-A1c	groundmass	AZ16A	Klaudia Kuiper	28.201	0.08	0.0030679	0.1	0.977051	0.17	1	1e-13
	17_VU101B-A1C_1	15		0.470232	0.795827	6.85749	1.99723	0.325256	0.433883	21.0523	0.174608	309.697	0.0450513	8.06868	0.111506	44.7846	0.611397	54.8365	6.09718	1.3198	0.05292		17_VU101B-A1C_1	15	0.02019	0.0002022	0.0113505	8.96e-05	0.0122153	7.38e-05	0.0235104	0.0002914	4.38469	0.0149345		17_VU101B-A1C_1	15	17_VU101B-A1c	groundmass	AZ16A	Klaudia Kuiper	28.201	0.08	0.0030679	0.1	0.977051	0.17	1	1e-13
	18_VU101B-A1C_1	20		0.268223	0.789954	19.4758	1.36437	0.791903	0.383591	66.3868	0.173602	571.05	0.0428202	7.41931	0.0329857	41.2206	0.181216	86.2354	19.2274	1.46544	0.0403107		18_VU101B-A1C_1	20	0.02019	0.0002022	0.0113505	8.96e-05	0.0122153	7.38e-05	0.0235104	0.0002914	4.38469	0.0149345		18_VU101B-A1C_1	20	18_VU101B-A1c	groundmass	AZ16A	Klaudia Kuiper	28.201	0.08	0.0030679	0.1	0.977051	0.17	1	1e-13
	20_VU101B-A1C_1	23		0.0961145	0.954657	19.3206	1.50637	0.888002	0.372424	77.0126	0.172144	576.919	0.0440429	7.13874	0.026447	39.6786	0.145416	95.2785	22.3055	1.71371	0.0519656		20_VU101B-A1C_1	23	0.0203425	0.0002099	0.0116559	0.0001602	0.0132049	0.0001081	0.0349299	0.000453	4.8067	0.0168253		20_VU101B-A1C_1	23	20_VU101B-A1c	groundmass	AZ16A	Klaudia Kuiper	28.201	0.08	0.0030679	0.1	0.977051	0.17	1	1e-13
	21_VU101B-A1C_1	26		0.048061	1.21166	13.0977	1.49206	0.648299	0.395932	56.7081	0.177172	411.287	0.0561498	7.01811	0.0268924	39.0152	0.147919	96.7503	16.4249	1.86145	0.0559381		21_VU101B-A1C_1	26	0.0203425	0.0002099	0.0116559	0.0001602	0.0132049	0.0001081	0.0349299	0.000453	4.8067	0.0168253		21_VU101B-A1C_1	26	21_VU101B-A1c	groundmass	AZ16A	Klaudia Kuiper	28.201	0.08	0.0030679	0.1	0.977051	0.17	1	1e-13
	22_VU101B-A1C_1	29	4	0.0401826	1.45247	10.7573	1.62111	0.469161	0.3882	40.9758	0.173813	297.074	0.0404903	6.97828	0.026389	38.7961	0.145167	96.2352	11.8679	1.63763	0.0534		22_VU101B-A1C_1	29	0.0203425	0.0002099	0.0116559	0.0001602	0.0132049	0.0001081	0.0349299	0.000453	4.8067	0.0168253		22_VU101B-A1C_1	29	22_VU101B-A1c	groundmass	AZ16A	Klaudia Kuiper	28.201	0.08	0.0030679	0.1	0.977051	0.17	1	1e-13
	24_VU101B-A1C_1	32	4	0.0372647	1.33464	7.98309	2.56663	0.294555	0.424205	25.6062	0.172093	188.606	0.0411877	6.95631	0.0273373	38.6752	0.150394	94.423	7.41616	1.37896	0.0709448		24_VU101B-A1C_1	32	0.0199891	0.0001781	0.0115976	8.29e-05	0.013389	0.0001458	0.0578255	0.000486	4.74734	0.0183678		24_VU101B-A1C_1	32	24_VU101B-A1c	groundmass	AZ16A	Klaudia Kuiper	28.201	0.08	0.0030679	0.1	0.977051	0.17	1	1e-13
	25_VU101B-A1C_1	36	4	0.0432858	1.22688	5.93392	1.99477	0.216701	0.516004	18.3923	0.172421	140.068	0.0514605	6.939	0.0305749	38.58	0.168214	91.0961	5.3268	1.3325	0.0533591		25_VU101B-A1C_1	36	0.0199891	0.0001781	0.0115976	8.29e-05	0.013389	0.0001458	0.0578255	0.000486	4.74734	0.0183678		25_VU101B-A1C_1	36	25_VU101B-A1c	groundmass	AZ16A	Klaudia Kuiper	28.201	0.08	0.0030679	0.1	0.977051	0.17	1	1e-13
	26_VU101B-A1C_1	40	4	0.0462907	1.22337	5.14818	2.5497	0.12751	0.498788	10.478	0.175951	85.7998	0.0635462	6.90974	0.041875	38.419	0.230404	84.3545	3.03429	0.874879	0.0447198		26_VU101B-A1C_1	40	0.0199891	0.0001781	0.0115976	8.29e-05	0.013389	0.0001458	0.0578255	0.000486	4.74734	0.0183678		26_VU101B-A1C_1	40	26_VU101B-A1c	groundmass	AZ16A	Klaudia Kuiper	28.201	0.08	0.0030679	0.1	0.977051	0.17	1	1e-13
	28_VU101B-A1C_1	50		0.0723172	1.00898	4.47816	2.75397	0.0767851	0.506645	5.5899	0.189958	59.785	0.0780009	6.89869	0.0844008	38.3582	0.464404	64.4679	1.61843	0.536461	0.0296182		28_VU101B-A1C_1	50	0.0194727	0.0002307	0.0114138	8.67e-05	0.0130253	0.0001182	0.0258521	0.0003378	4.49531	0.0212196		28_VU101B-A1C_1	50	28_VU101B-A1c	groundmass	AZ16A	Klaudia Kuiper	28.201	0.08	0.0030679	0.1	0.977051	0.17	1	1e-13
	29_VU101B-A1C_1	70		0.12422	0.869553	4.41166	3.24128	0.0757623	0.655726	4.56402	0.194306	68.4543	0.0720701	6.95257	0.146636	38.6547	0.806716	46.3244	1.32126	0.444561	0.0288708		29_VU101B-A1C_1	70	0.0194727	0.0002307	0.0114138	8.67e-05	0.0130253	0.0001182	0.0258521	0.0003378	4.49531	0.0212196		29_VU101B-A1C_1	70	29_VU101B-A1c	groundmass	AZ16A	Klaudia Kuiper	28.201	0.08	0.0030679	0.1	0.977051	0.17	1	1e-13
	30_VU101B-A1C_1	150		0.0103897	3.64148	9.55183	1.8661	0.168994	0.473197	14.8046	0.173567	104.983	0.053937	6.93472	0.0295939	38.5565	0.162819	97.7503	4.2868	0.666179	0.0249706		30_VU101B-A1C_1	150	0.0194727	0.0002307	0.0114138	8.67e-05	0.0130253	0.0001182	0.0258521	0.0003378	4.49531	0.0212196		30_VU101B-A1C_1	150	30_VU101B-A1c	groundmass	AZ16A	Klaudia Kuiper	28.201	0.08	0.0030679	0.1	0.977051	0.17	1	1e-13
			S	1.90924	0.359486	108.572	0.587695	4.25385	0.142938	345.277	0.0657683	3036.4	0.0163881
	Information on Analysis and Constants Used in Calculations									Results		40(a)/36(a)	± 2s	40(r)/39(k)	± 2s	Age	± 2s	MSWD	39Ar(k)	K/Ca	± 2s
																(Ma)			(%,n)
	Sample = 16_VU101B-A1C				Age Equations = Min et al. (2000)					Age Plateau Error Mean				6.95325	0.0258317	38.6584	0.161397	2.94544	27.6452	1.25211	0.350084
	Material = groundmass				Negative Intensities = Allowed										0.00371506		0.00417496	0.0315483	4
	Location = AZ16A				Decay Constant 40K = 5.460 ± 0.053 E-10 1/a					Full External Error							0.819133	2.63299	2σ Confidence Limit
	Analyst = Klaudia Kuiper				Decay Constant 39Ar = 2.940 ± 0.016 E-07 1/h					Analytical Error							0.142112	1.71623	Error Magnification
	Project = VU101				Decay Constant 37Ar = 8.230 ± 0.012 E-04 1/h
	Mass Discrimination Law = LIN				Decay Constant 36Cl = 2.257 ± 0.015 E-06 1/a					Total Fusion Age				7.16865	0.0155158	39.843	0.116147		12	1.36718	0.0161701
	Irradiation = VU101				Decay Activity 40K(EC,β⁺) = 3.310 ± 0.030 1/gs										0.00216439		0.00291512
	J = 0.00306790 ± 0.00000307				Decay Activity 40K(β⁻) = 27.890 ± 0.150 1/gs					Full External Error							0.835589
	FCs = 28.201 ± 0.023 Ma				Atmospheric Ratio 40/36(a) = 298.56 ± 0.31					Analytical Error							0.0853043
	IGSN = Undefined				Atmospheric Ratio 38/36(a) = 0.1885 ± 0.0003
	Preferred Age = Undefined				Production Ratio 39/37(ca) = 0.000673 ± 0.000004					Normal Isochron		277.179	13.5638	6.99303	0.0290255	38.8773	0.177233	0.370038	27.6452
	Classification = Undefined				Production Ratio 36/37(ca) = 0.000264 ± 0.000002								0.0489353		0.00415063		0.00455877	0.690708	4
	Experiment Type = Undefined				Production Ratio 40/39(k) = 0.000860 ± 0.000070					Full External Error							0.826803	3	2σ Confidence Limit
	Extraction Method = Undefined				Production Ratio 38/39(k) = 0.012110 ± 0.000030					Analytical Error							0.159664	1	Error Magnification
	Heating = 45 sec				Production Ratio 36/38(cl) = 262.80 ± 1.71												38		Number of Iterations
	Isolation = 5.00 min				Scaling Ratio K/Ca = 0.430												6.93113e-05		Convergence
	Instrument = HELIX				Abundance Ratio 40K/K = 1.1700 ± 0.0100 E-04
	Lithology = Undefined				Atomic Weight K = 39.0983 ± 0.0001 g					Inverse Isochron		278.73	13.5517	6.98928	0.029018	38.8567	0.177179	0.334636	27.6452
	Lat-Lon = Undefined - Undefined												0.0486192		0.00415178		0.00455982	0.715598	4
	Feature = Undefined									Full External Error							0.826377	3	2σ Confidence Limit
										Analytical Error							0.159624	1	Error Magnification
																	3		Number of Iterations
																	2.31359e-05		Convergence
																	0.110638		Spreading Factor
[truncated: 39 more columns]

## Sheet: Hidden Data
Double Line Plot Age Plateau			Double Line Plot K/Ca Plateau			X-Y Plot Normal Isochron		X-Y Plot Inverse Isochron		Error Ellipses Normal Isochron		Error Ellipses Inverse Isochron
Ar39k%	Line 1	Line 2	Ar39k%	Line 1	Line 2	X-axis	Y-axis	X-axis	Y-axis	X-axis	Y-axis	X-axis	Y-axis
0	37.4652	46.3247	0	0.820798	1.22703	5.68057	341.403	0.0166389	0.00292909			0.0167057	0.00293056
1.07331	37.4652	46.3247	1.07331	0.820798	1.22703	44.9332	661.112	0.0679662	0.0015126			0.0167037	0.00291901
1.07331	45.396	44.1732	1.07331	1.37272	1.26688	252.293	2170.4	0.116243	0.000460744			0.0166973	0.00290814
7.17049	45.396	44.1732	7.17049	1.37272	1.26688	846.02	6338.07	0.133482	0.000157777			0.0166868	0.0028987
7.17049	41.0394	41.4018	7.17049	1.42513	1.50575	1271.19	9219.92	0.137874	0.000108461			0.0166731	0.00289133
26.3979	41.0394	41.4018	26.3979	1.42513	1.50575	1097.1	7954.4	0.137923	0.000125717			0.0166571	0.00288653
26.3979	39.824	39.5332	26.3979	1.76567	1.66174	728.183	5364.02	0.135753	0.000186427			0.0166399	0.00288464
48.7035	39.824	39.5332	48.7035	1.76567	1.66174	440.763	3357.01	0.131296	0.000297884			0.0166225	0.00288577
48.7035	38.8673	39.1631	48.7035	1.80551	1.91738	233.121	1909.36	0.122093	0.000523735			0.0166063	0.00288986
65.1283	38.8673	39.1631	65.1283	1.80551	1.91738	78.5393	840.378	0.0934571	0.00118994			0.0165923	0.00289661
65.1283	38.9413	38.651	65.1283	1.69103	1.58423	37.0651	556.258	0.066633	0.00179773			0.0165815	0.00290559
76.9962	38.9413	38.651	76.9962	1.69103	1.58423	1880.8	13341.4	0.140975	7.49545e-05			0.0165746	0.00291616
76.9962	38.5249	38.8256	76.9962	1.30802	1.44991							0.016572	0.00292761
84.4124	38.5249	38.8256	84.4124	1.30802	1.44991							0.0165741	0.00293917
84.4124	38.7482	38.4118	84.4124	1.38586	1.27914							0.0165805	0.00295004
89.7392	38.7482	38.4118	89.7392	1.38586	1.27914							0.0165909	0.00295948
89.7392	38.1886	38.6494	89.7392	0.830159	0.919598							0.0166046	0.00296685
92.7735	38.1886	38.6494	92.7735	0.830159	0.919598							0.0166206	0.00297164
92.7735	38.8226	37.8938	92.7735	0.566079	0.506843							0.0166379	0.00297354
94.3919	38.8226	37.8938	94.3919	0.566079	0.506843							0.0166552	0.00297241
94.3919	37.848	39.4614	94.3919	0.41569	0.473432							0.0166714	0.00296832
95.7132	37.848	39.4614	95.7132	0.41569	0.473432							0.0166854	0.00296156
95.7132	38.7193	38.3937	95.7132	0.691149	0.641208							0.0166963	0.00295259
100	38.7193	38.3937	100	0.691149	0.641208							0.0167032	0.00294202
												0.0167057	0.00293056
												0.0682113	0.00151295
												0.068203	0.00150667
												0.0681785	0.0015008
												0.0681395	0.00149573
												0.0680888	0.00149181
												0.0680296	0.00148931
												0.0679662	0.0014884
												0.0679027	0.00148913
												0.0678436	0.00149147
												0.0677928	0.00149524
												0.0677539	0.0015002
												0.0677293	0.00150601
												0.067721	0.00151226
												0.0677293	0.00151854
												0.0677538	0.00152441
												0.0677928	0.00152948
												0.0678435	0.00153339
												0.0679027	0.0015359
												0.0679661	0.00153681
												0.0680296	0.00153607
												0.0680887	0.00153374
												0.0681395	0.00152996
												0.0681785	0.001525
												0.068203	0.0015192
												0.0682113	0.00151295
												0.116658	0.000460839
												0.116644	0.000458911
												0.116603	0.000457108
												0.116537	0.000455552
												0.116451	0.000454351
												0.11635	0.000453585
												0.116243	0.000453308
												0.116135	0.000453536
												0.116035	0.000454257
												0.115949	0.000455419
												0.115883	0.000456944
												0.115841	0.000458728
												0.115827	0.000460649
												0.115841	0.000462577
												0.115883	0.00046438
												0.115949	0.000465935
												0.116035	0.000467137
												0.116135	0.000467903
												0.116243	0.00046818
												0.11635	0.000467951
												0.116451	0.000467231
												0.116537	0.000466069
												0.116603	0.000464544
												0.116644	0.00046276
												0.116658	0.000460839
												0.133957	0.000157811
												0.133941	0.000156982
												0.133893	0.000156208
												0.133818	0.00015554
												0.133719	0.000155025
												0.133605	0.000154697
												0.133482	0.000154579
												0.133359	0.000154679
												0.133245	0.000154991
												0.133147	0.000155492
												0.133071	0.000156148
												0.133024	0.000156916
												0.133008	0.000157742
												0.133024	0.000158571
												0.133071	0.000159345
												0.133147	0.000160013
												0.133245	0.000160528
												0.133359	0.000160856
												0.133482	0.000160974
												0.133605	0.000160874
												0.133719	0.000160563
												0.133818	0.000160062
												0.133893	0.000159405
												0.133941	0.000158638
												0.133957	0.000157811
												0.138387	0.000108498
												0.13837	0.000107759
												0.138318	0.000107069
												0.138237	0.000106473
												0.138131	0.000106013
												0.138007	0.00010572
												0.137874	0.000105613
												0.137742	0.000105701
												0.137618	0.000105976
												0.137512	0.000106421
												0.137431	0.000107005
												0.137379	0.000107688
												0.137362	0.000108424
												0.137379	0.000109162
												0.137431	0.000109853
												0.137512	0.000110448
												0.137618	0.000110908
												0.137742	0.000111202
												0.137874	0.000111308
												0.138007	0.000111221
												0.138131	0.000110945
												0.138237	0.0001105
												0.138318	0.000109916
												0.13837	0.000109233
												0.138387	0.000108498
												0.138415	0.00012574
												0.138399	0.000124718
												0.13835	0.000123764
												0.138271	0.000122943
												0.138169	0.000122312
												0.138051	0.000121912
												0.137923	0.000121772
												0.137796	0.0001219
												0.137677	0.000122288
												0.137575	0.000122911
												0.137497	0.000123724
												0.137447	0.000124673
												0.137431	0.000125693
												0.137447	0.000126715
												0.137497	0.000127669
												0.137575	0.00012849
												0.137677	0.000129122
												0.137796	0.000129521
												0.137923	0.000129662
												0.138051	0.000129533
												0.138169	0.000129145
												0.138271	0.000128523
												0.13835	0.000127709
												0.138399	0.00012676
												0.138415	0.00012574
												0.136234	0.000186463
												0.136217	0.000185088
												0.136169	0.000183803
												0.136093	0.000182698
												0.135993	0.000181847
												0.135877	0.000181308
												0.135753	0.000181118
												0.135629	0.000181289
												0.135513	0.000181811
												0.135413	0.000182647
												0.135337	0.000183741
												0.135289	0.000185018
												0.135273	0.000186391
												0.135289	0.000187767
												0.135337	0.000189051
												0.135413	0.000190156
												0.135513	0.000191008
												0.135629	0.000191547
												0.135753	0.000191737
												0.135877	0.000191565
												0.135993	0.000191043
												0.136093	0.000190207
												0.136169	0.000189113
												0.136217	0.000187836
												0.136234	0.000186463
												0.131769	0.000297972
												0.131753	0.000296001
												0.131705	0.000294158
												0.13163	0.000292569
												0.131532	0.000291343
												0.131418	0.000290562
												0.131296	0.00029028
												0.131174	0.000290516
												0.13106	0.000291255
												0.130962	0.000292445
												0.130887	0.000294006
												0.13084	0.000295831
												0.130824	0.000297796
												0.13084	0.000299767
												0.130887	0.00030161
												0.130962	0.000303199
												0.13106	0.000304425
												0.131174	0.000305206
												0.131296	0.000305488
												0.131418	0.000305252
												0.131532	0.000304513
												0.13163	0.000303323
												0.131705	0.000301762
												0.131753	0.000299937
												0.131769	0.000297972
												0.12255	0.000523961
												0.122535	0.000520526
												0.122489	0.000517309
												0.122417	0.00051453
												0.122322	0.000512379
												0.122212	0.000511001
												0.122093	0.000510492
												0.121975	0.000510884
												0.121865	0.000512153
												0.12177	0.00051421
												0.121698	0.000516917
												0.121652	0.000520088
												0.121636	0.000523508
												0.121652	0.000526944
												0.121698	0.00053016
												0.12177	0.000532939
												0.121865	0.00053509
												0.121975	0.000536468
												0.122093	0.000536978
												0.122212	0.000536585
												0.122322	0.000535317
												0.122417	0.000533259
												0.122489	0.000530552
												0.122535	0.000527381
												0.12255	0.000523961
												0.0938411	0.00119065
												0.093828	0.00118428
												0.0937897	0.00117831
												0.0937287	0.00117312
												0.0936491	0.00116908
												0.0935565	0.00116646
												0.0934571	0.00116544
												0.0933577	0.0011661
												0.0932651	0.00116837
												0.0931856	0.00117212
												0.0931245	0.00117708
												0.0930862	0.00118292
												0.0930731	0.00118923
												0.0930861	0.0011956
												0.0931245	0.00120158
												0.0931855	0.00120676
												0.093265	0.0012108
												0.0933577	0.00121342
												0.093457	0.00121444
												0.0935564	0.00121379
												0.0936491	0.00121151
												0.0937286	0.00120776
												0.0937896	0.0012028
												0.093828	0.00119697
												0.0938411	0.00119065
												0.0669093	0.00179864
												0.0668999	0.00179041
												0.0668724	0.00178268
												0.0668285	0.00177598
												0.0667713	0.00177075
												0.0667046	0.00176737
												0.0666331	0.00176605
												0.0665616	0.0017669
												0.0664949	0.00176984
												0.0664376	0.00177468
												0.0663937	0.0017811
												0.0663661	0.00178865
												0.0663566	0.00179681
												0.066366	0.00180504
												0.0663936	0.00181277
												0.0664375	0.00181948
												0.0664947	0.0018247
												0.0665614	0.00182808
												0.0666329	0.0018294
												0.0667044	0.00182856
												0.0667711	0.00182561
												0.0668283	0.00182077
												0.0668723	0.00181435
												0.0668999	0.00180681
												0.0669093	0.00179864
												0.141488	7.49785e-05
												0.14147	7.30959e-05
												0.141419	7.13399e-05
												0.141337	6.98302e-05
												0.141231	6.86697e-05
												0.141108	6.79376e-05
												0.140975	6.76836e-05
												0.140842	6.79251e-05
												0.140718	6.86457e-05
												0.140612	6.97962e-05
												0.140531	7.12983e-05
												0.14048	7.30495e-05
												0.140462	7.49305e-05
												0.14048	7.68132e-05
												0.140531	7.85692e-05
												0.140612	8.00789e-05
												0.140718	8.12394e-05
												0.140842	8.19715e-05
												0.140975	8.22255e-05
												0.141108	8.19839e-05
												0.141231	8.12634e-05
												0.141337	8.01129e-05
												0.141419	7.86108e-05
												0.14147	7.68596e-05
												0.141488	7.49785e-05
