# Supplementary material for: Exploring a link between the Middle Eocene Climatic Optimum and Neotethys continental arc flare-up
Source: Copernicus journal article supplement (doi:10.5194/cp-17-229-2021), 2021-01-18
Supplement: Supplementary file [file cp-17-229-2021-supplement-title-page.pdf › cp-17-229-2021-supplement-title-page.pdf]

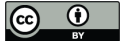

## *Supplement of*

# **Exploring a link between the Middle Eocene Climatic Optimum and Neotethys continental arc flare-up**

**Annique van der Boon et al.**

*Correspondence to:* Annique van der Boon ([avanderboon.work@gmail.com](mailto:avanderboon.work@gmail.com))

- [cp-17-229-2021-supplement-title-page.pdf](#)
- Supplementary material
  - [S10\\_VU101B-A2c.xls](#)
  - [S11\\_VU101B-A2da.xls](#)
  - [S12\\_VU101B-A2db.xls](#)
  - [S13\\_VU101B-A2f.xls](#)
  - [S14\\_VU101B-A3c.xls](#)
  - [S15\\_VU101B-A3da.xls](#)
  - [S16\\_VU101B-A3db.xls](#)
  - [S17\\_VU101B-A4e.xls](#)
  - [S18\\_VU101B-A7a.xls](#)
  - [S19\\_VU101B-A7e.xls](#)
  - [S1\\_Thin sections.jpg](#)
  - [S20\\_VU101B-A8a.xls](#)
  - [S21\\_VU101B-A8b.xls](#)
  - [S22\\_VU101B-A8e.xls](#)
  - [S23\\_VU101C-A4a.xls](#)
  - [S24\\_VU107-A1\\_1.xls](#)
  - [S25\\_VU107-A1\\_2.xls](#)
  - [S26\\_VU107-A2\\_1.xls](#)
  - [S27\\_VU107-A2\\_2.xls](#)
  - [S28\\_VU107-A4\\_1.xls](#)
  - [S29\\_VU107-A5\\_1.xls](#)
  - [S2\\_Literature ages.xlsx](#)

- S30\_VU107-A5\_2.xls
- S31\_VU107-A6\_1.xls
- S32\_VU107-A6\_2.xls
- S33\_Fig2C\_extended.pdf
- S3\_Literature list.docx
- S4\_Age compilation.kmz
- S5\_Detailed description of Ar-Ar.docx
- S6\_VU101B-A1c.xls
- S7\_VU101B-A1da.xls
- S8\_VU101B-A1db.xls
- S9\_VU101B-A1f.xls

The copyright of individual parts of the supplement might differ from the CC BY 4.0 License.
