# Supplementary figures and images for: Exploring a link between the Middle Eocene Climatic Optimum and Neotethys continental arc flare-up
Source: Copernicus journal article supplement (doi:10.5194/cp-17-229-2021), 2021-01-18

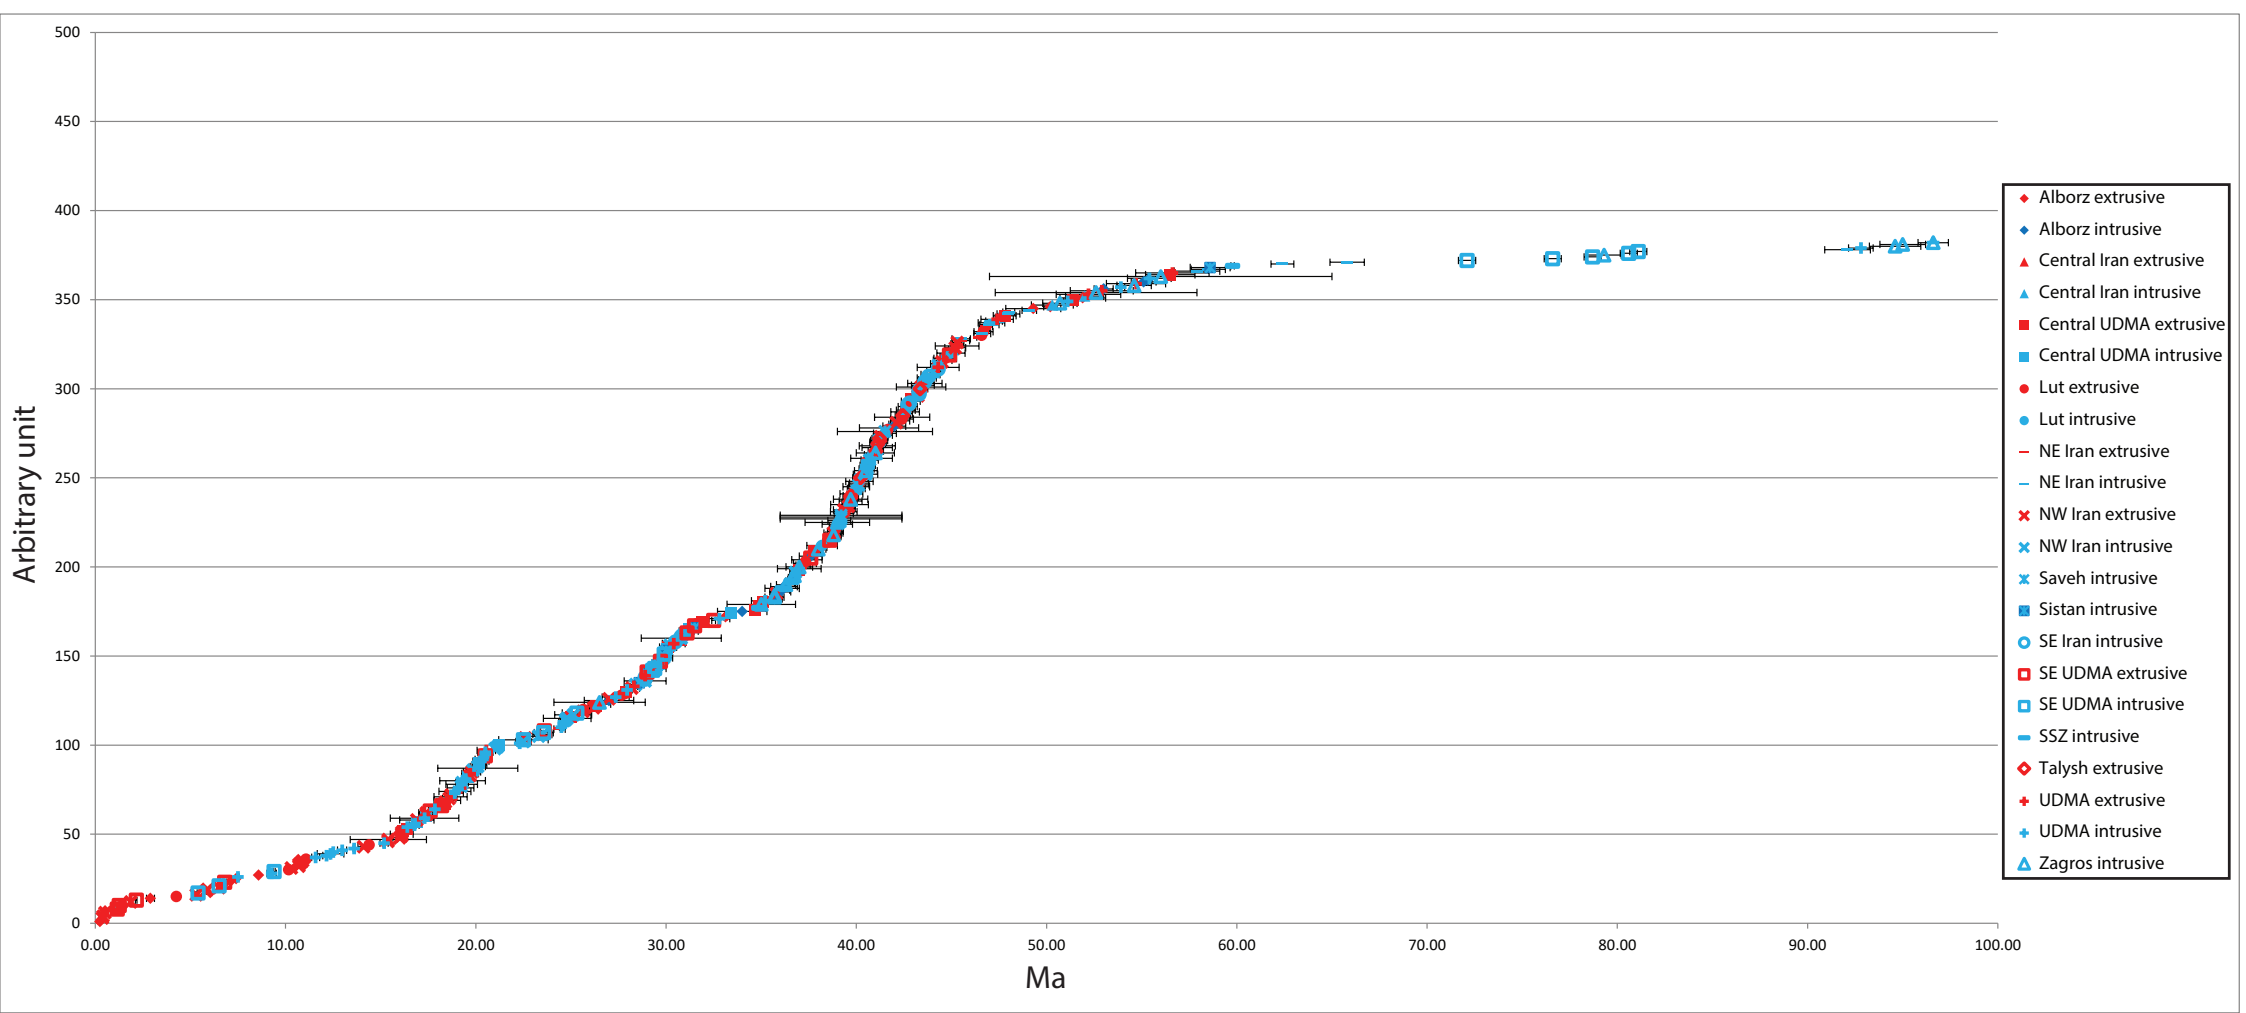

Supplement: Supplementary file 1 [file S33_Fig2C_extended.pdf › Supplementary material/S33_Fig2C_extended.pdf]
